# Supplementary material
Source: PubMed Central journal article supplement (PMC6698888)

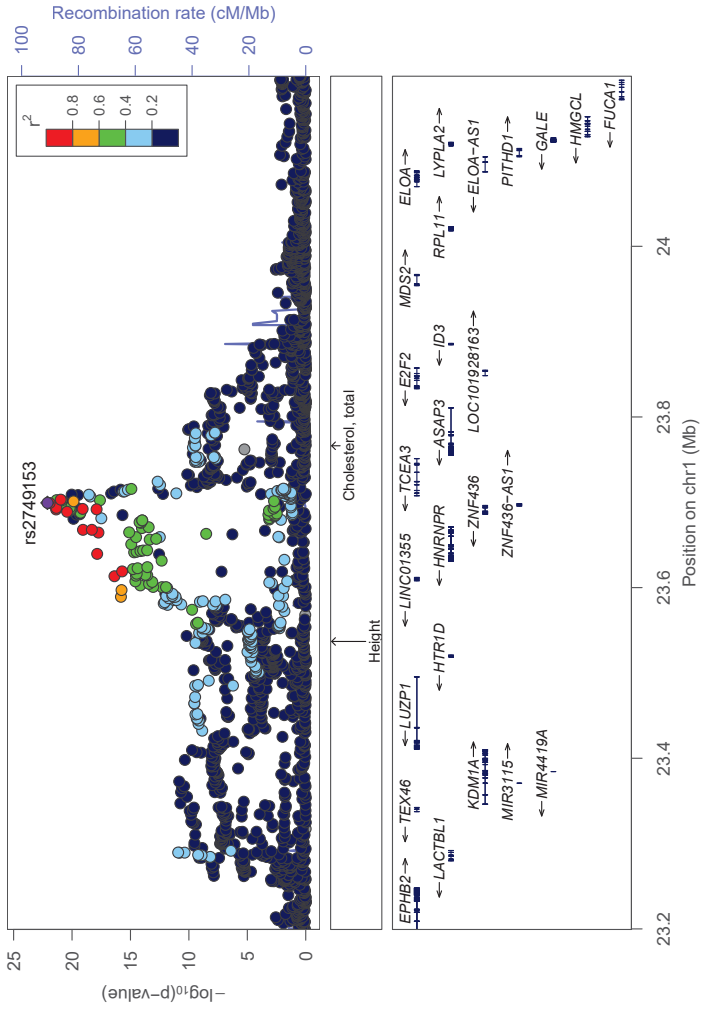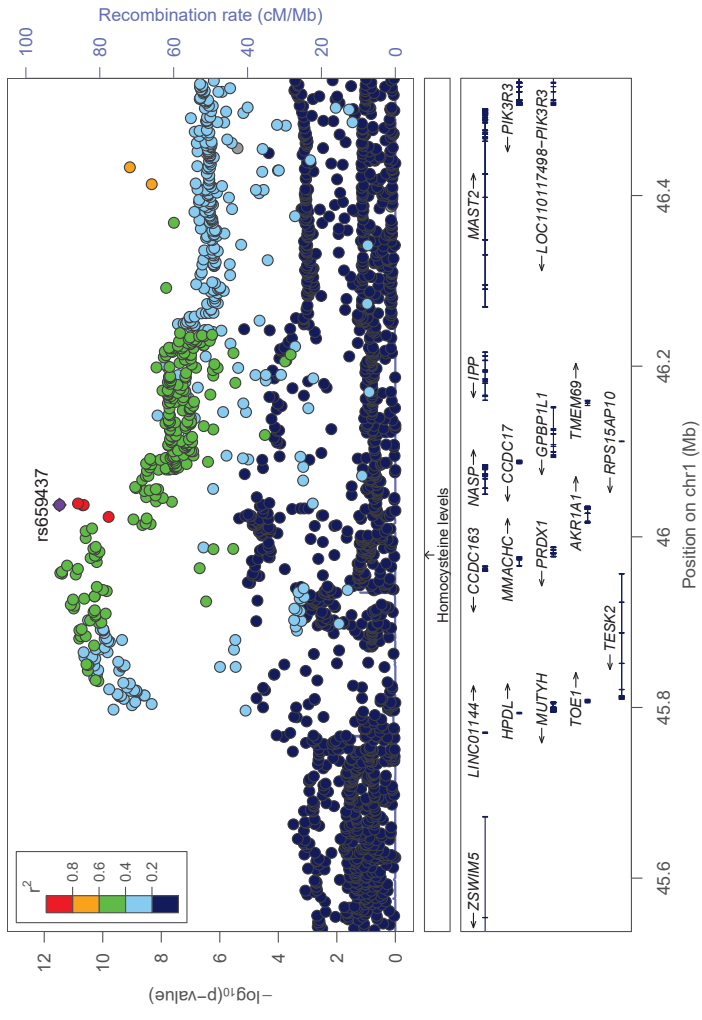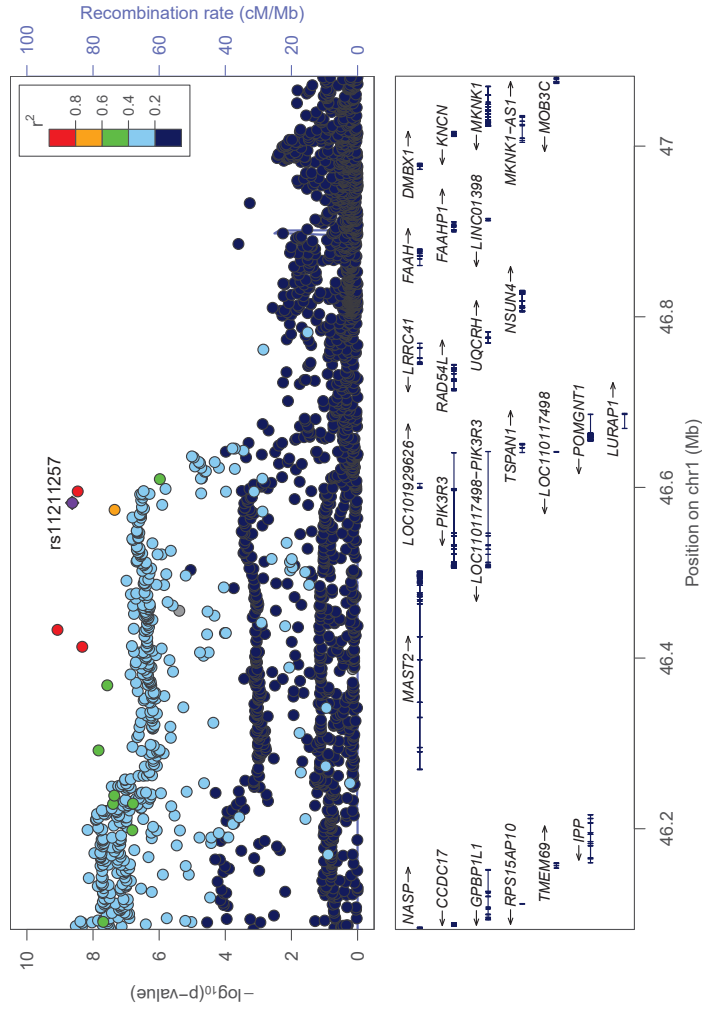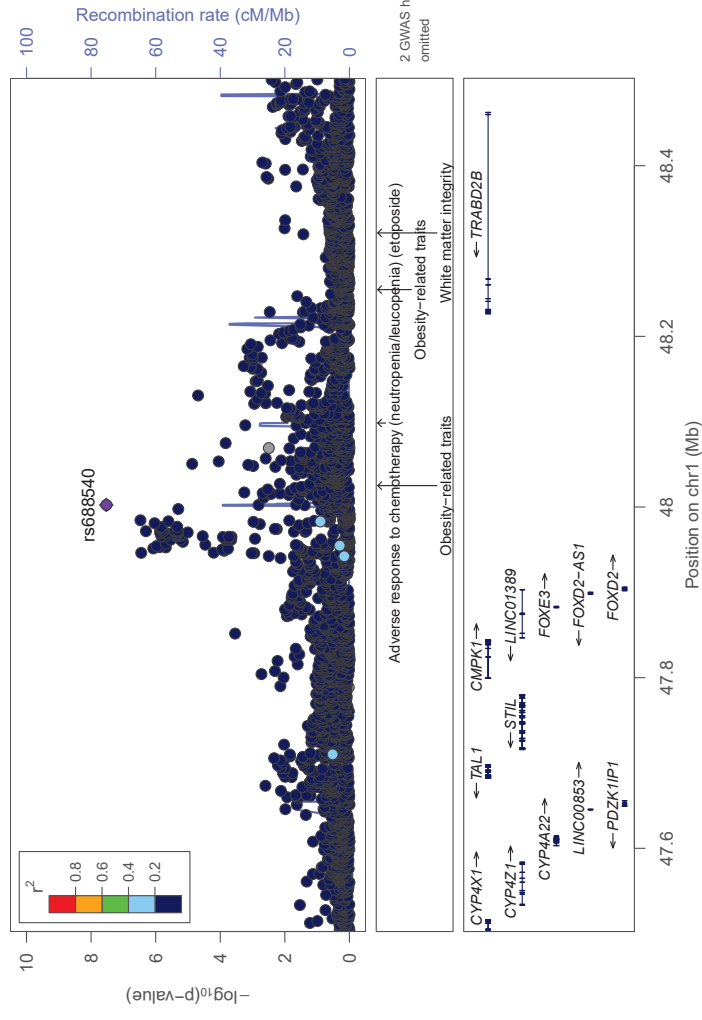

2 GWAS hits omitted

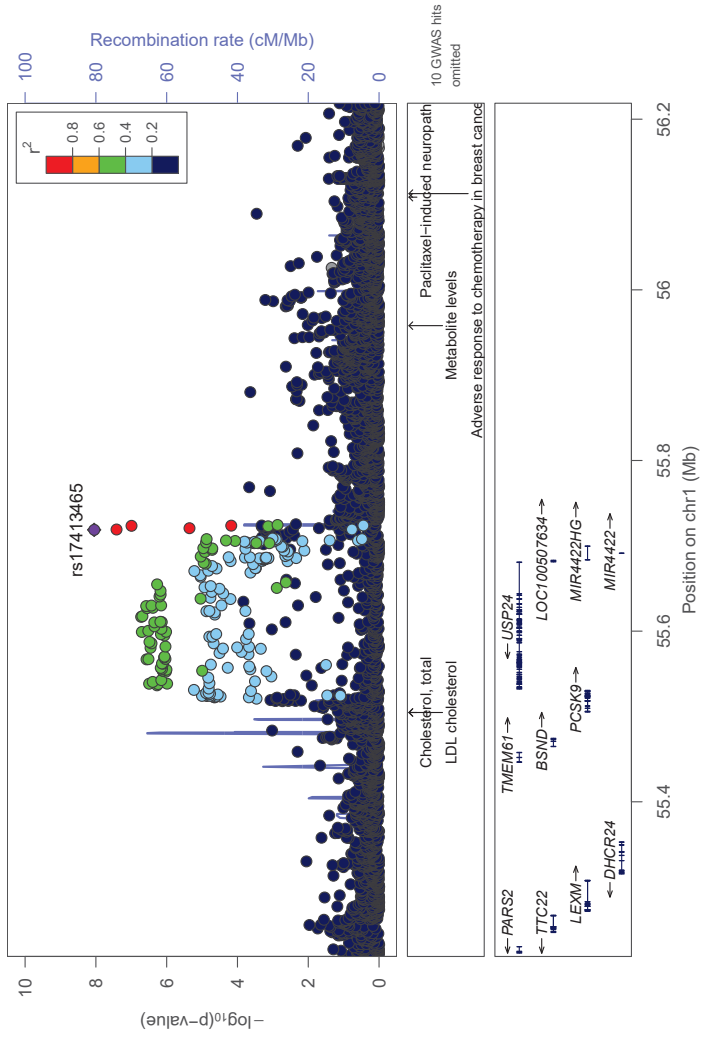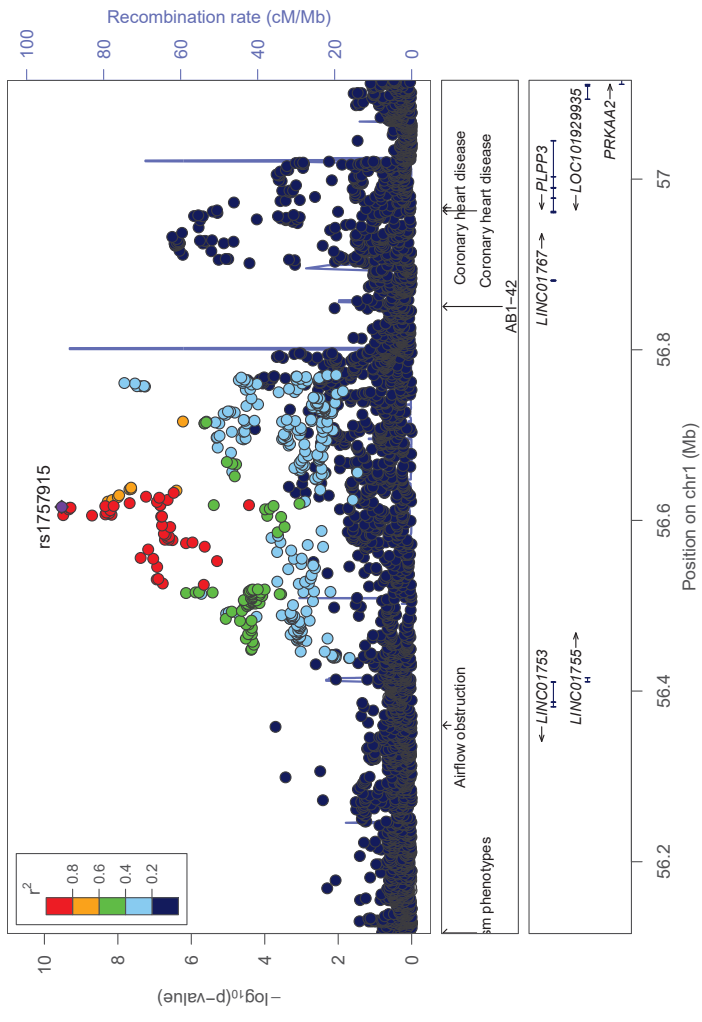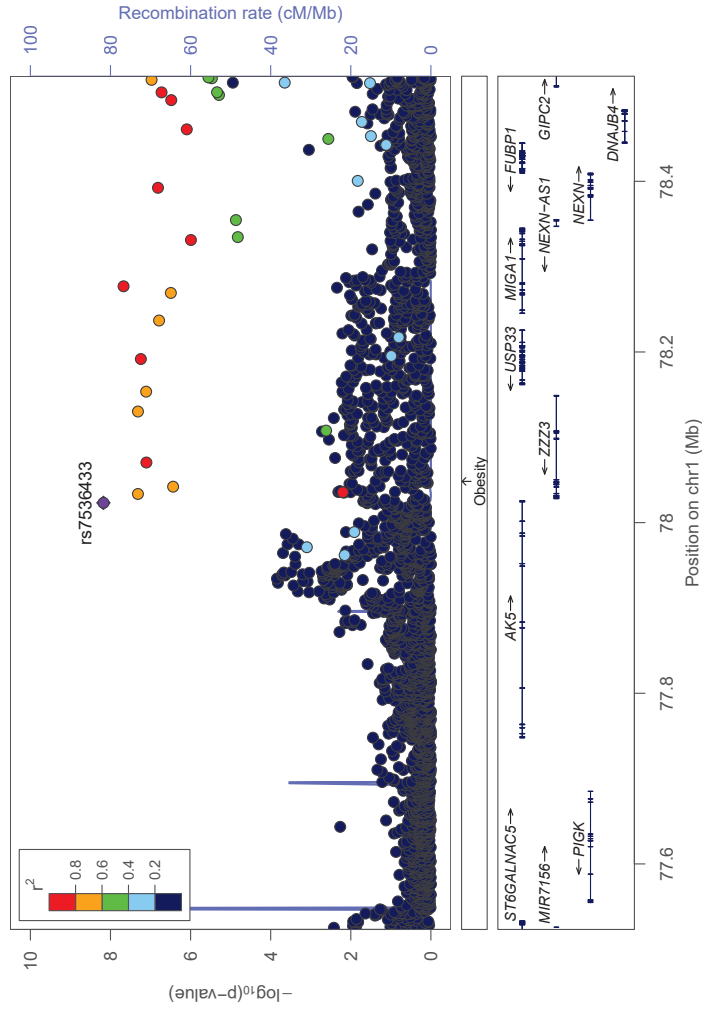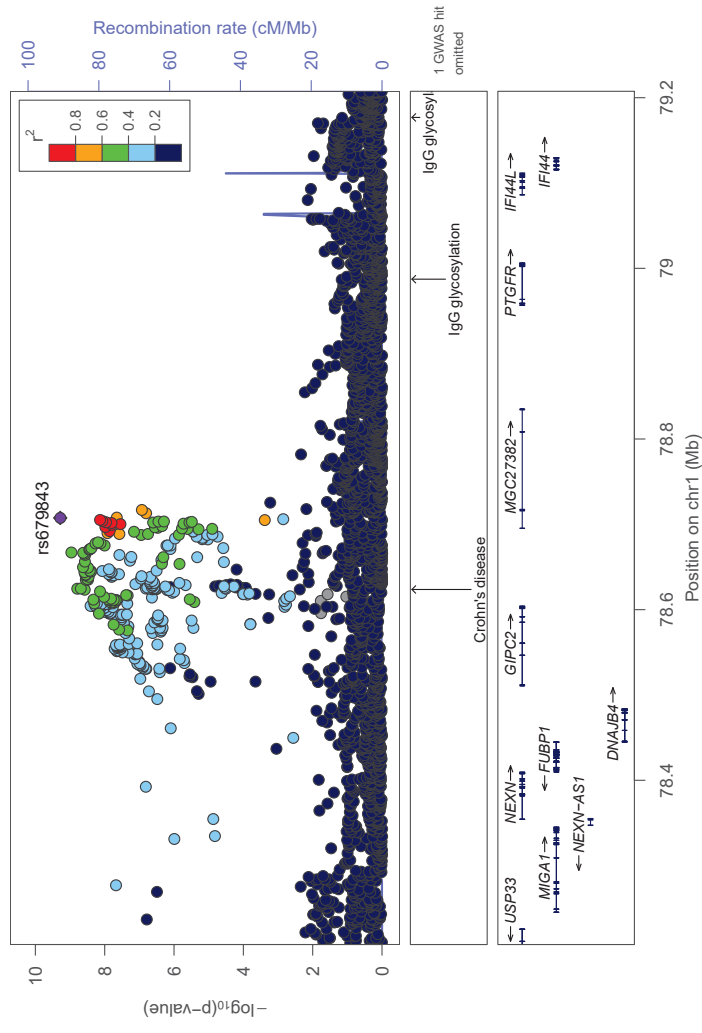

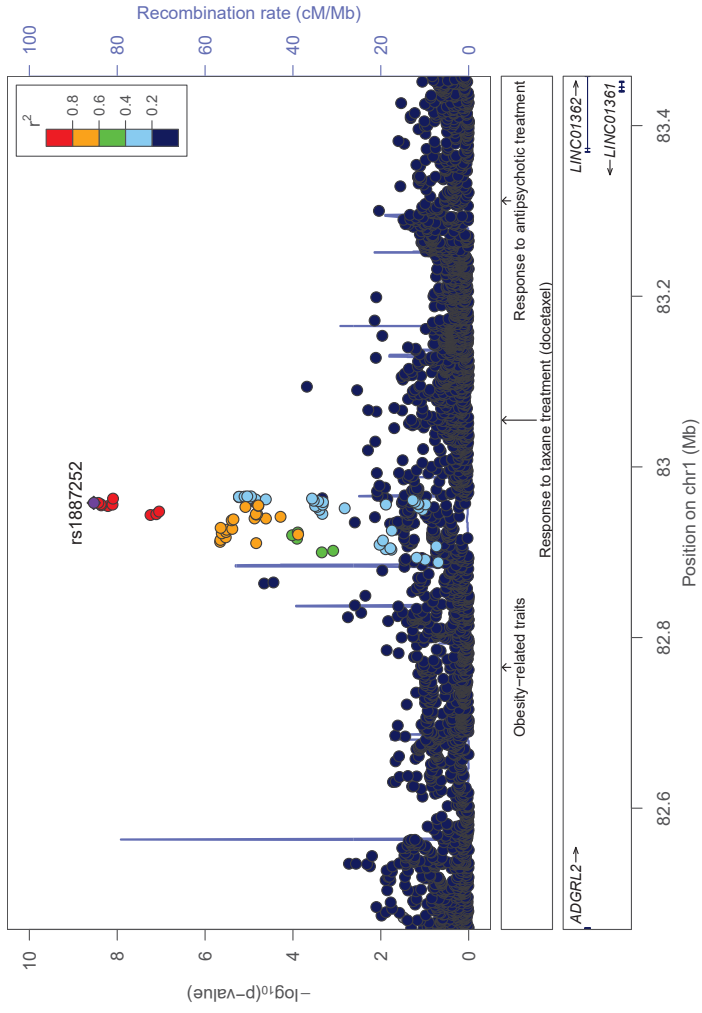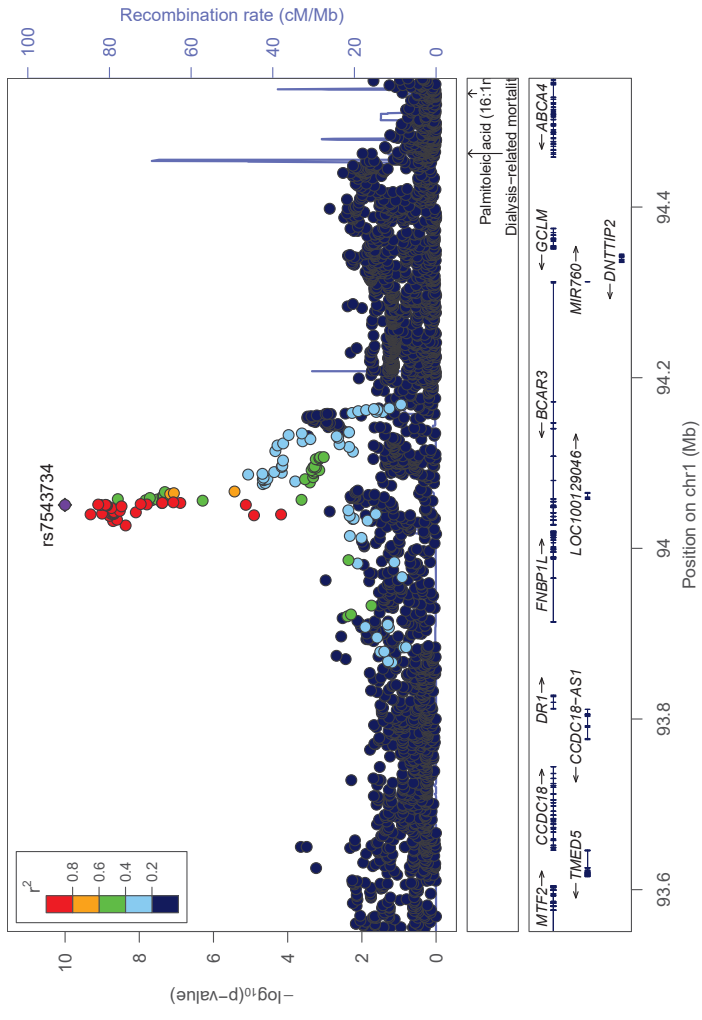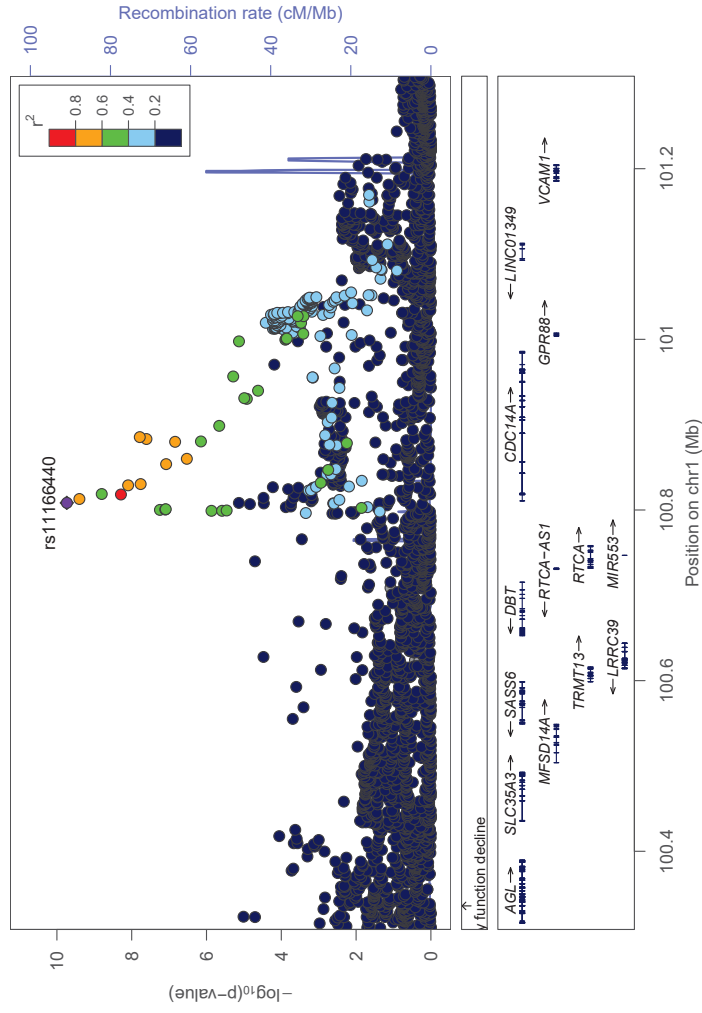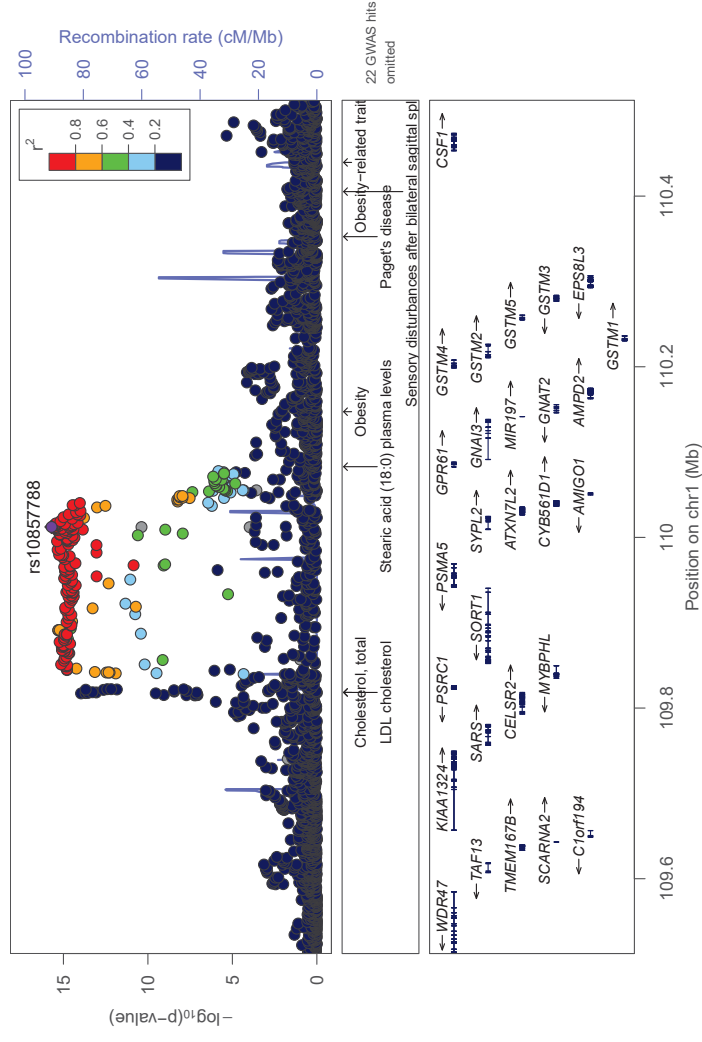

22 GWAS hits omitted



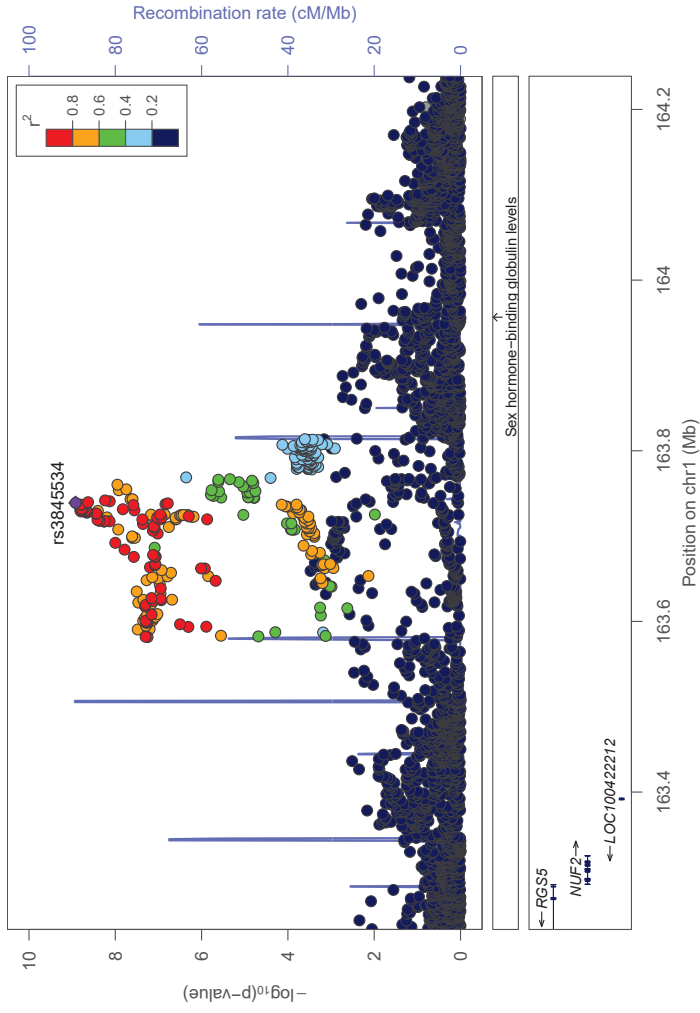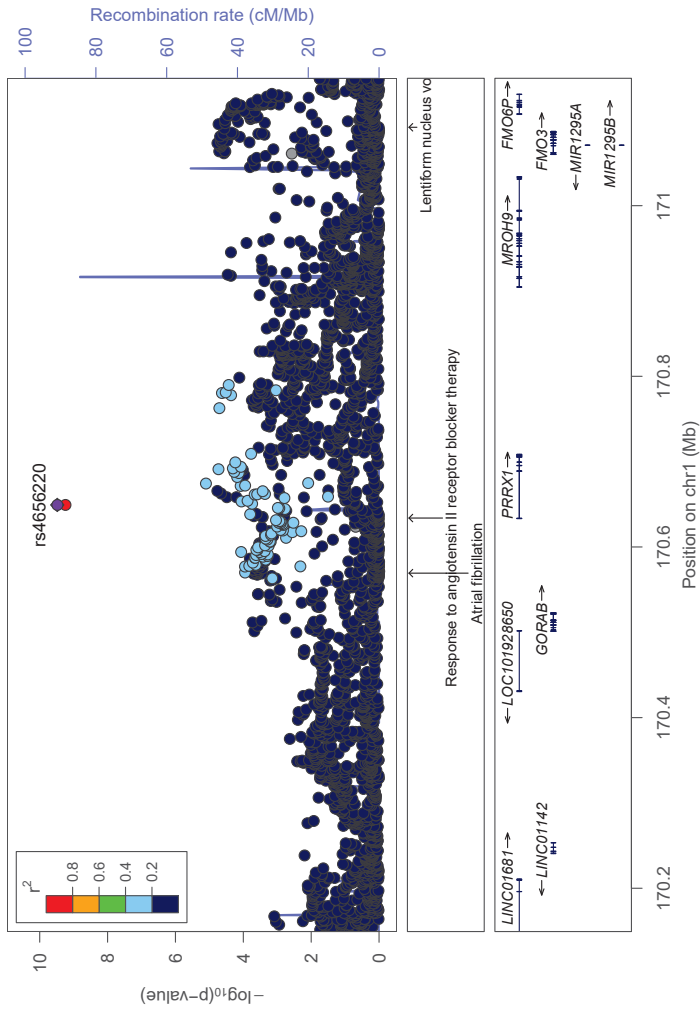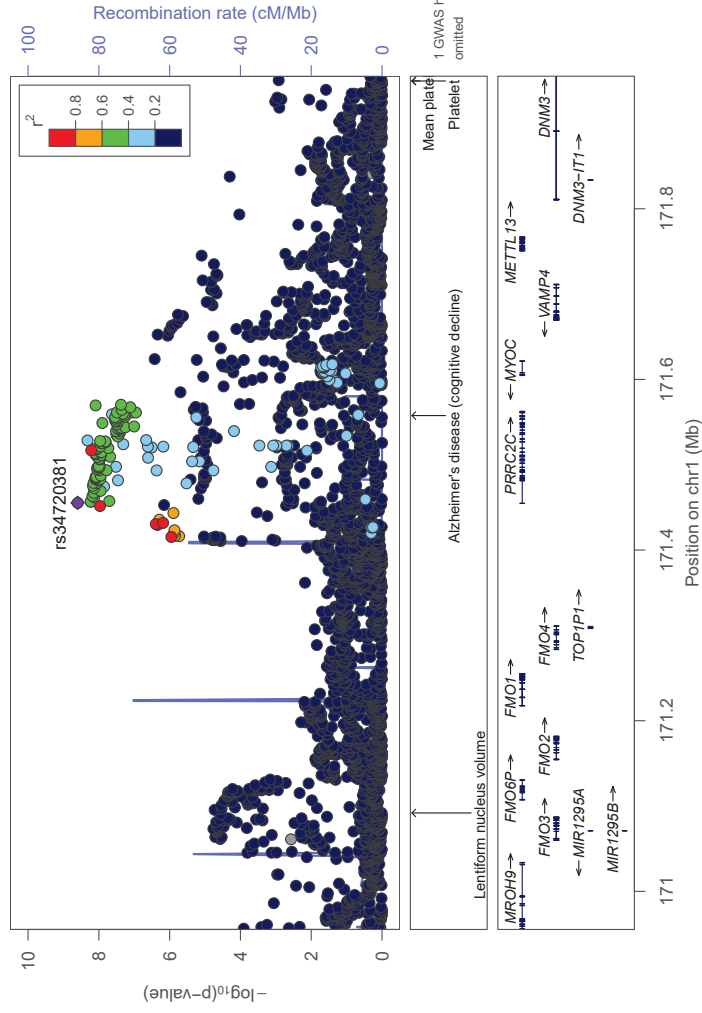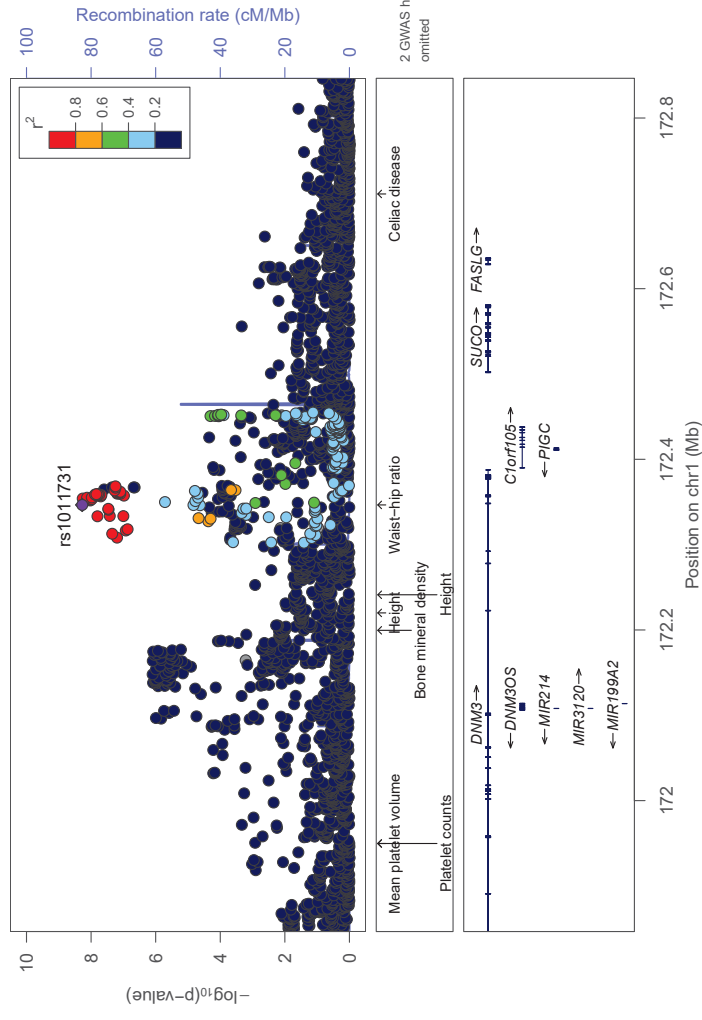

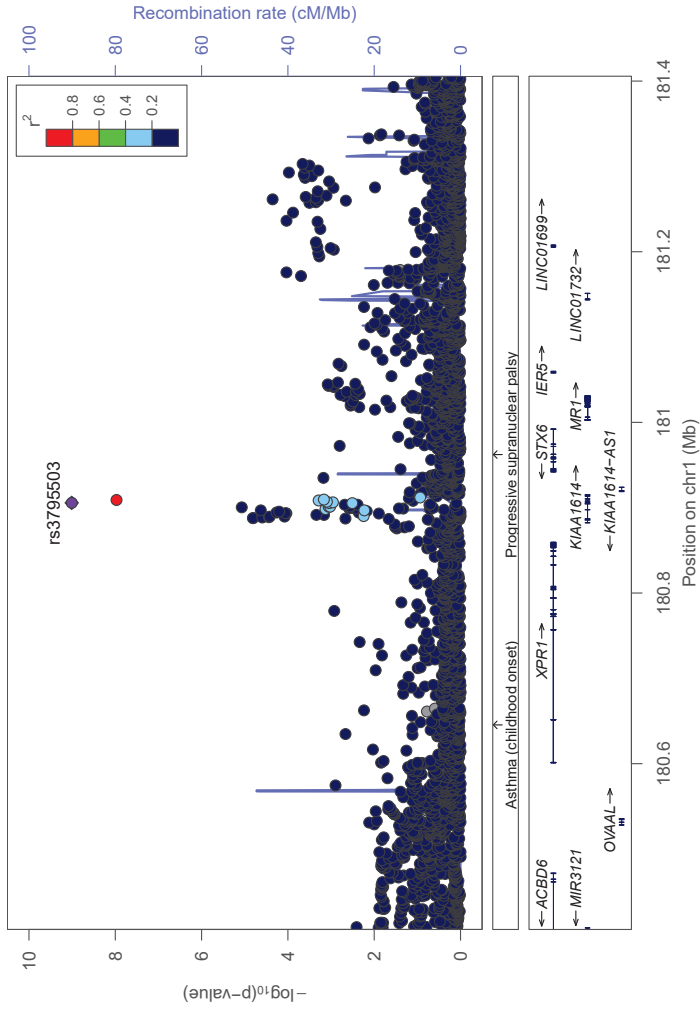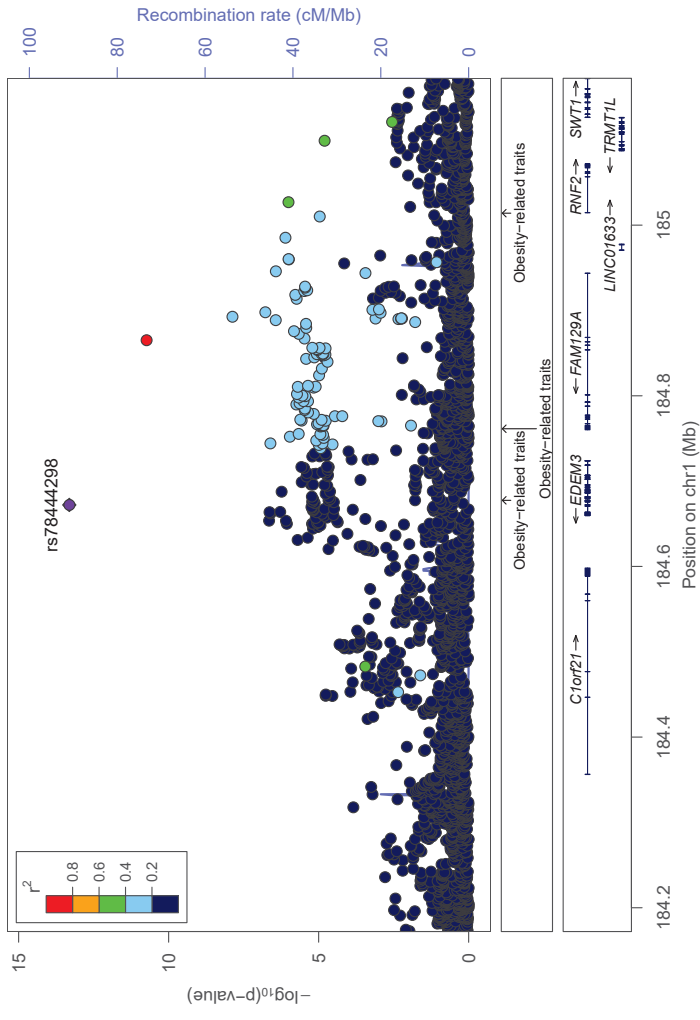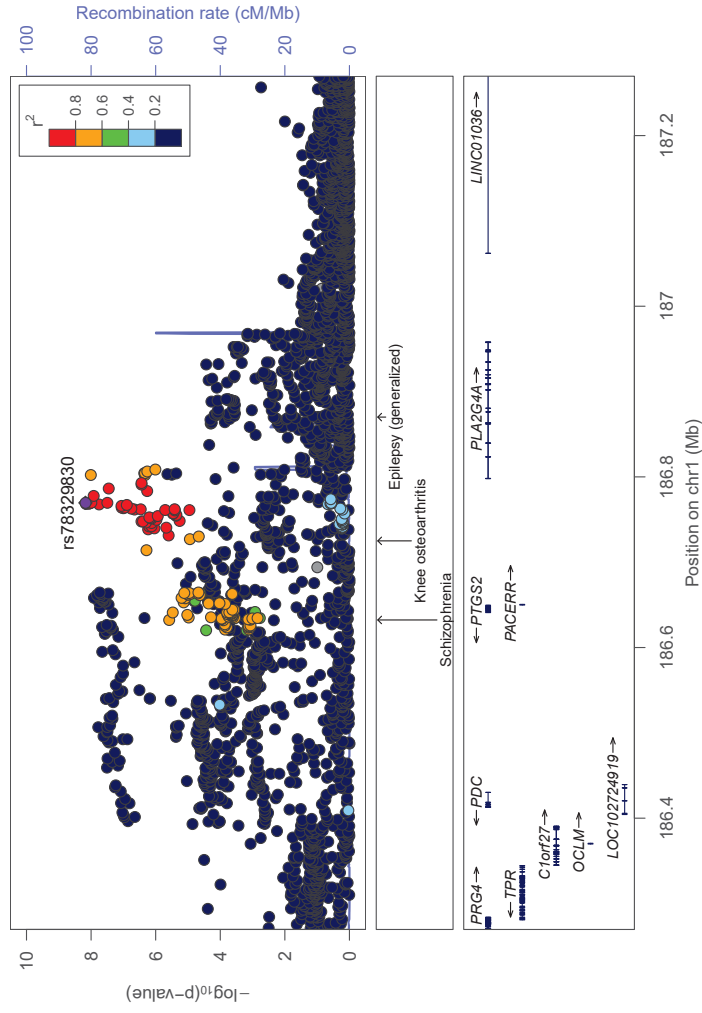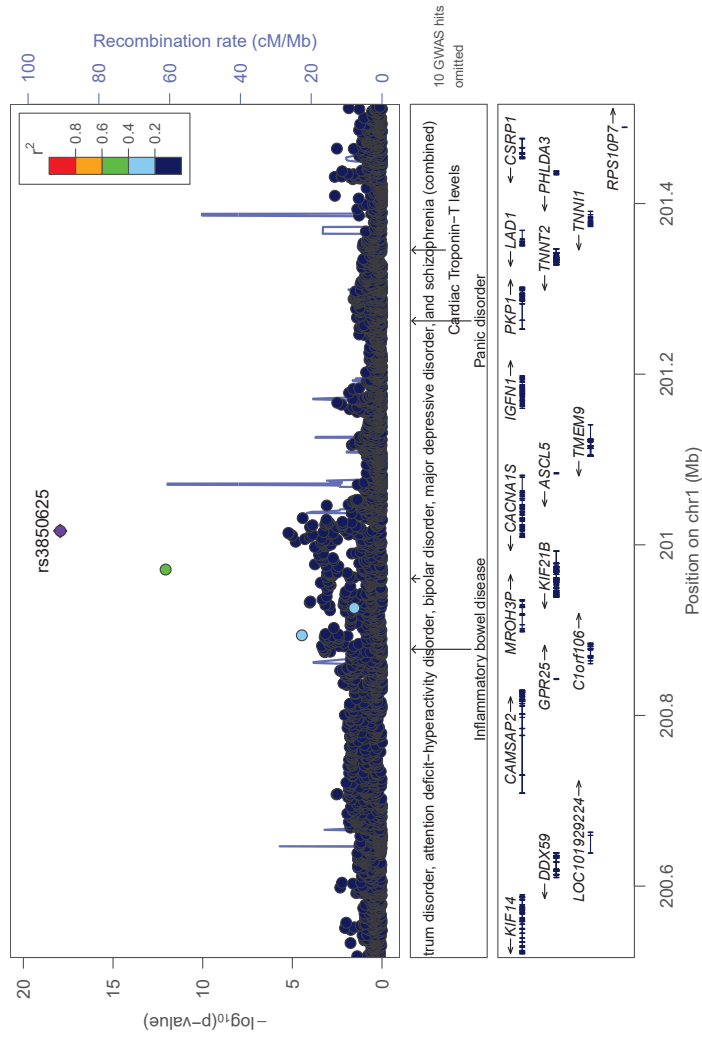

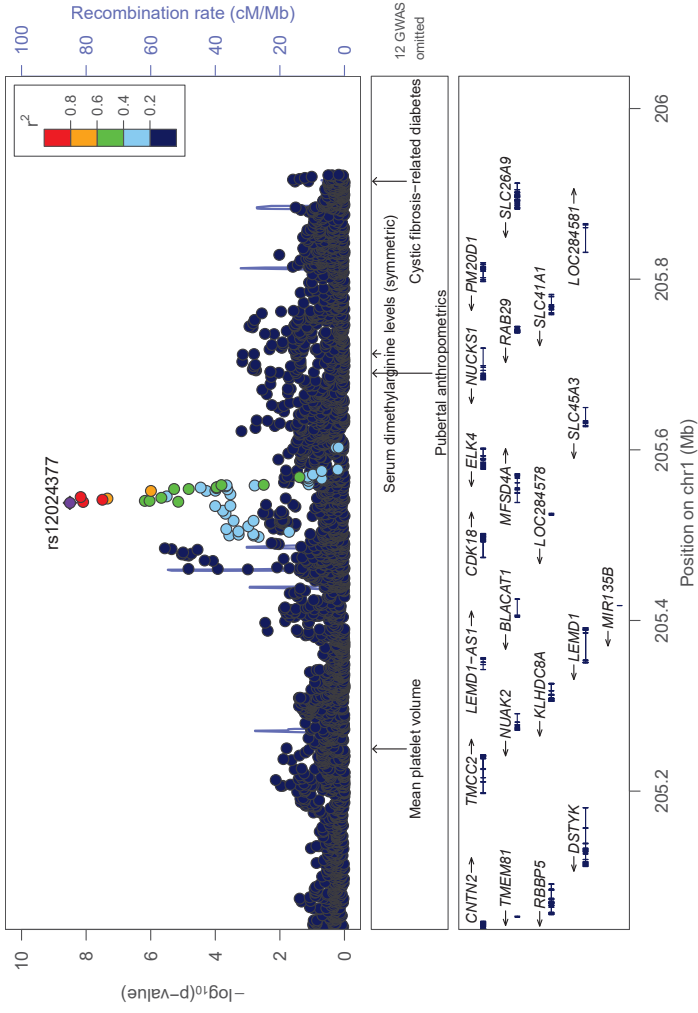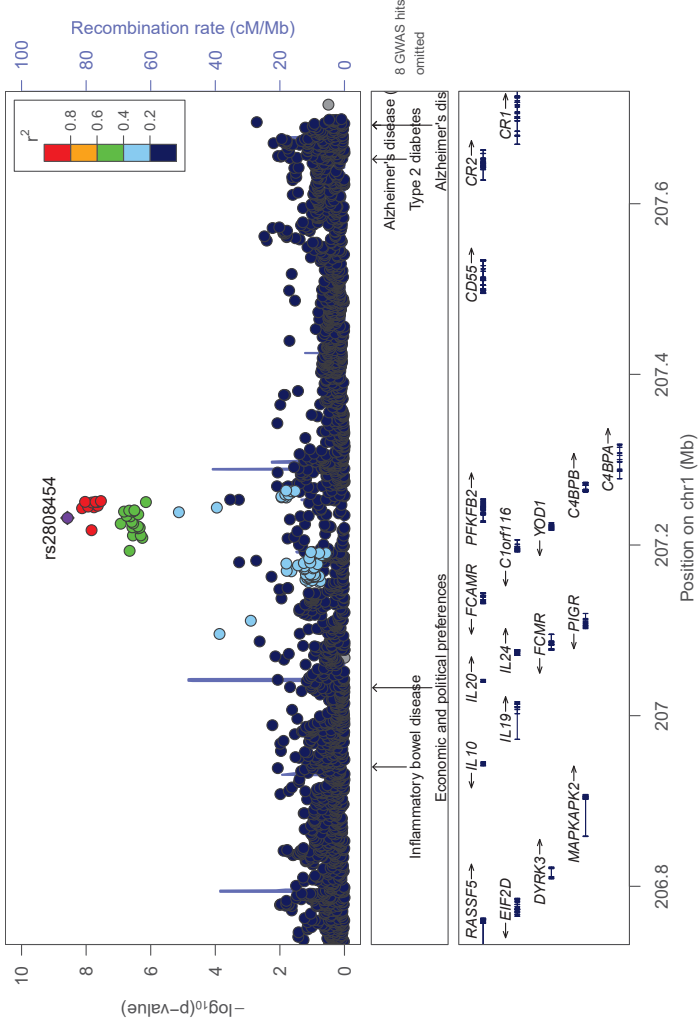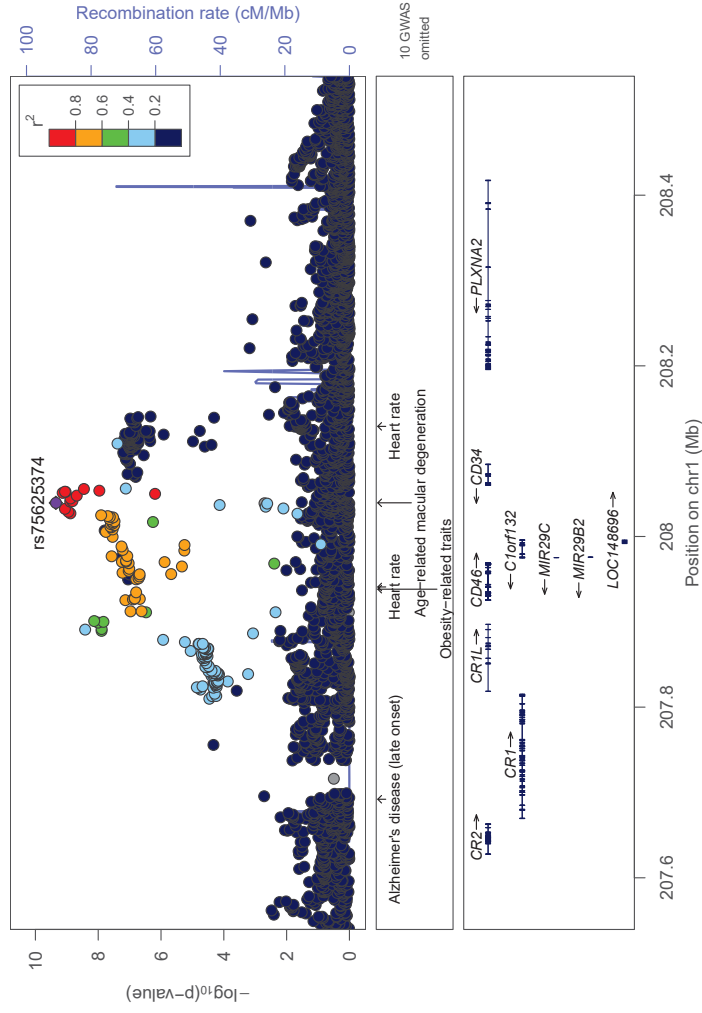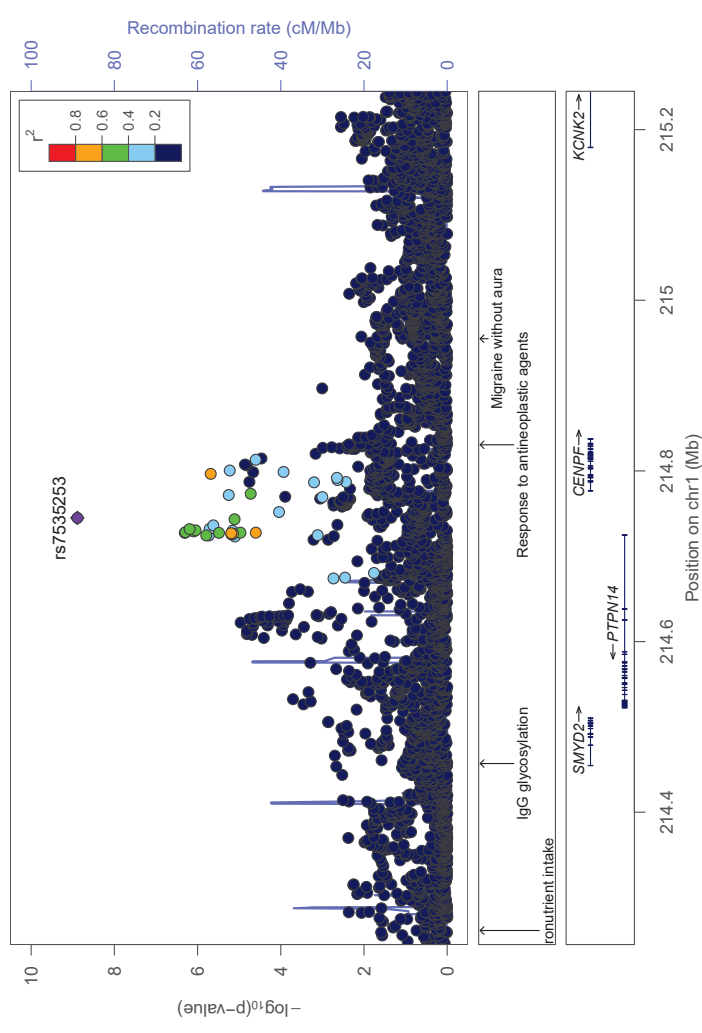



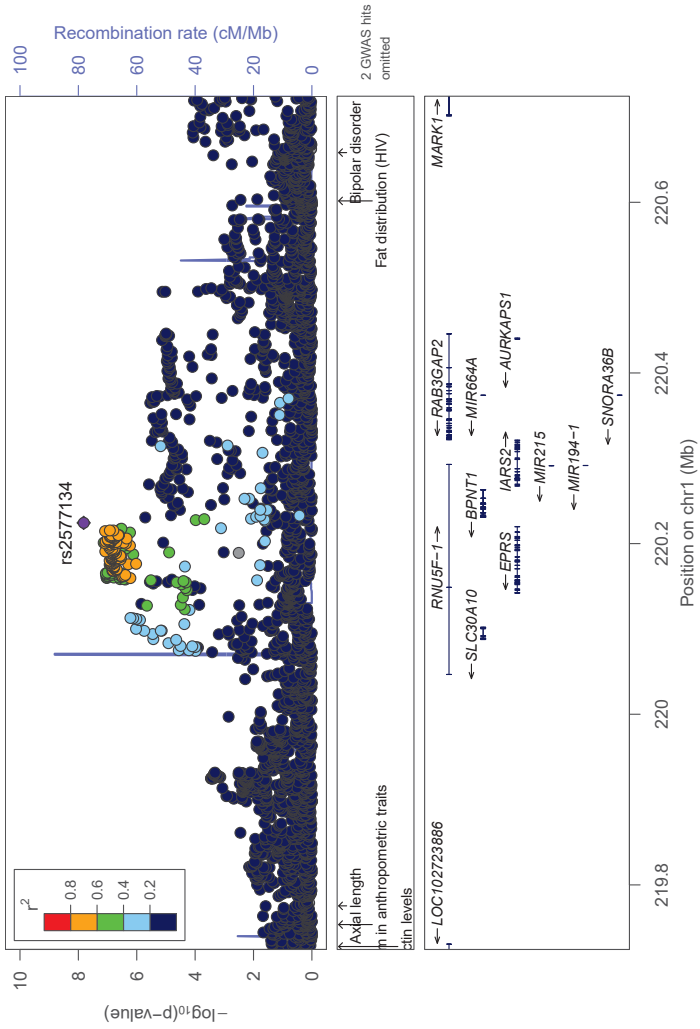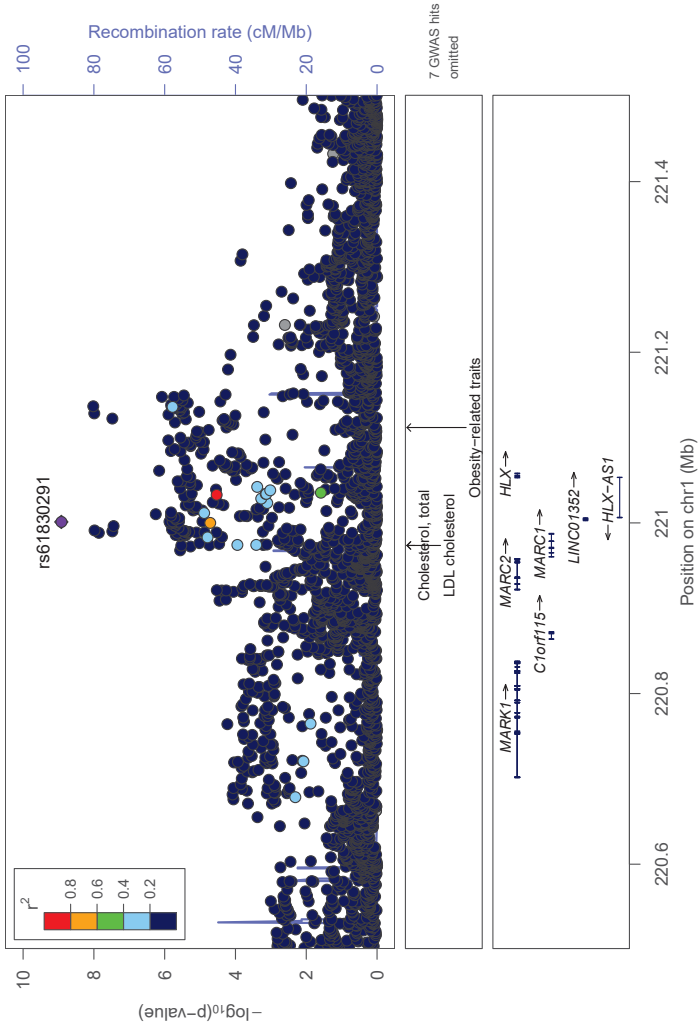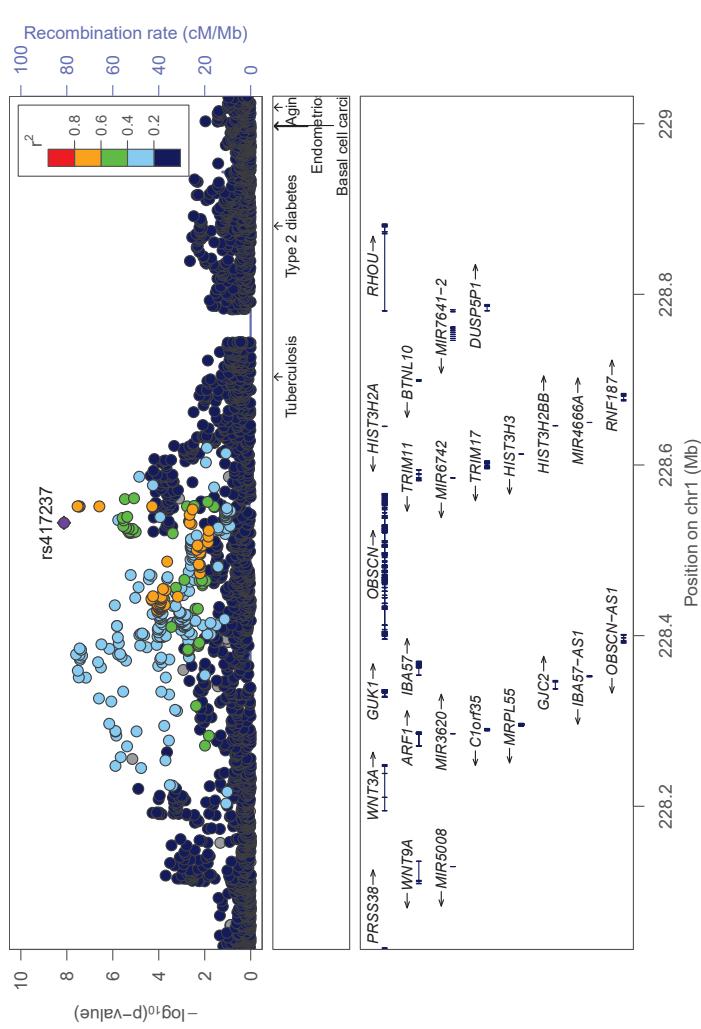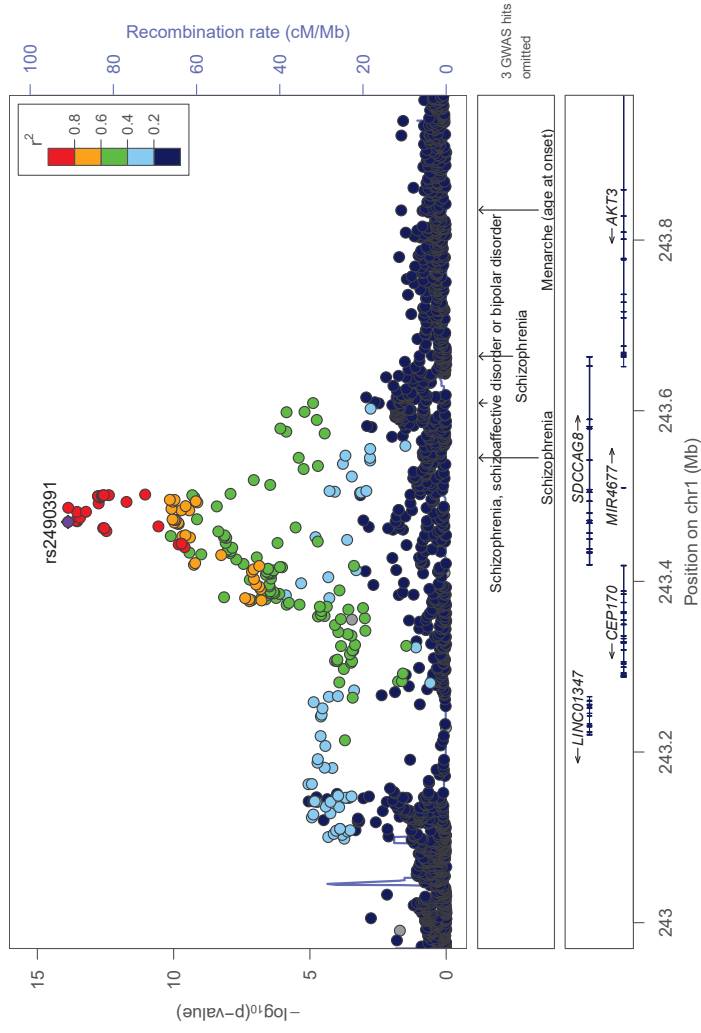

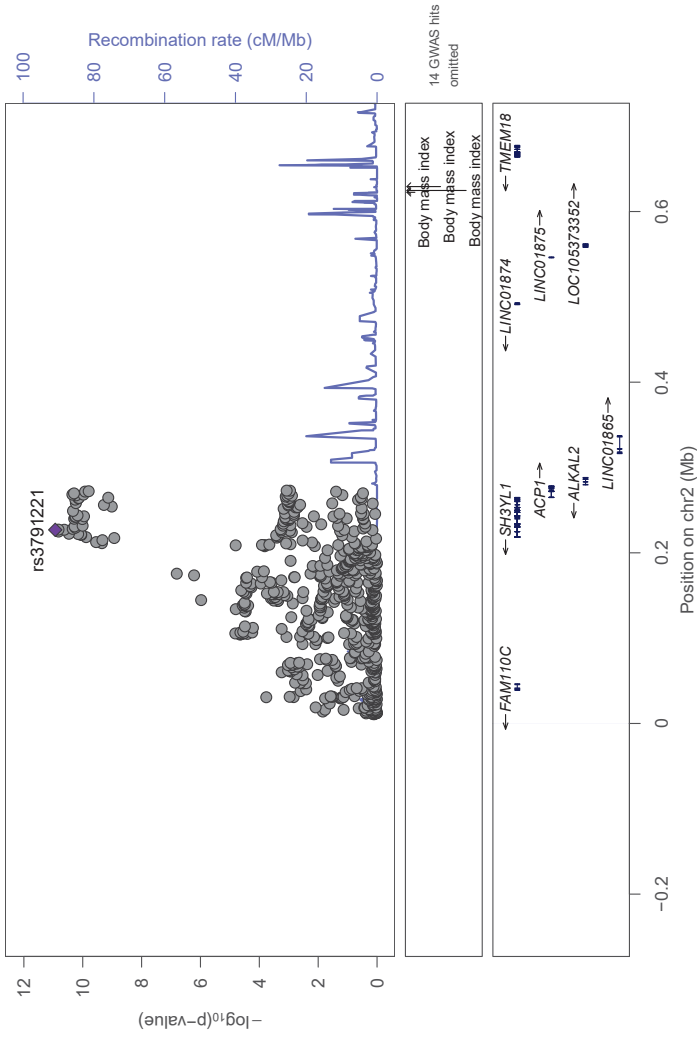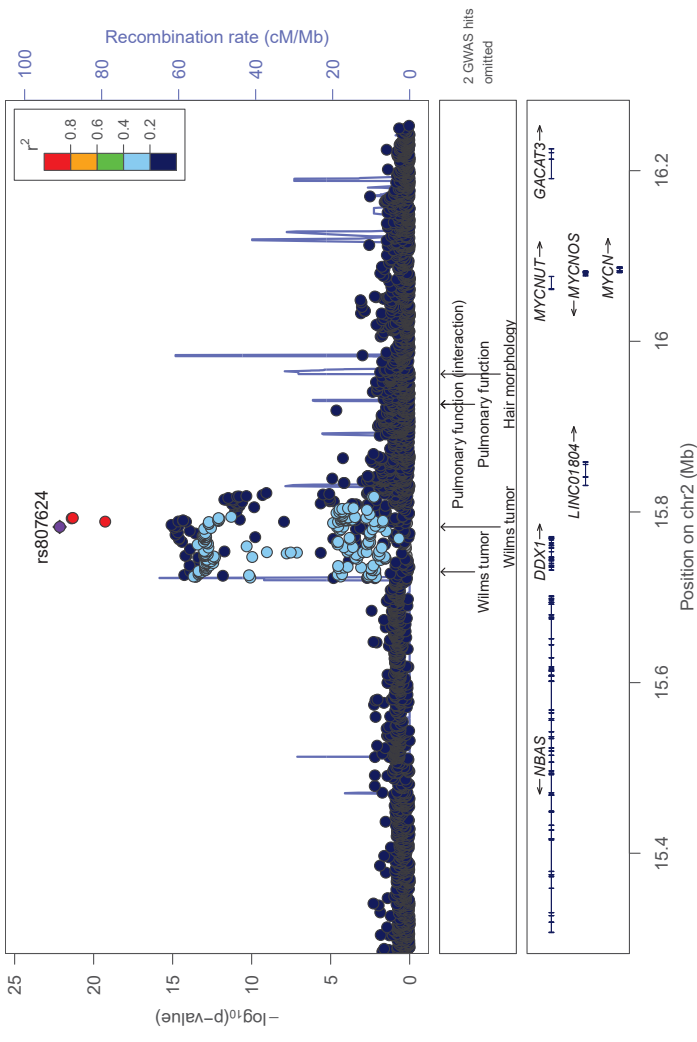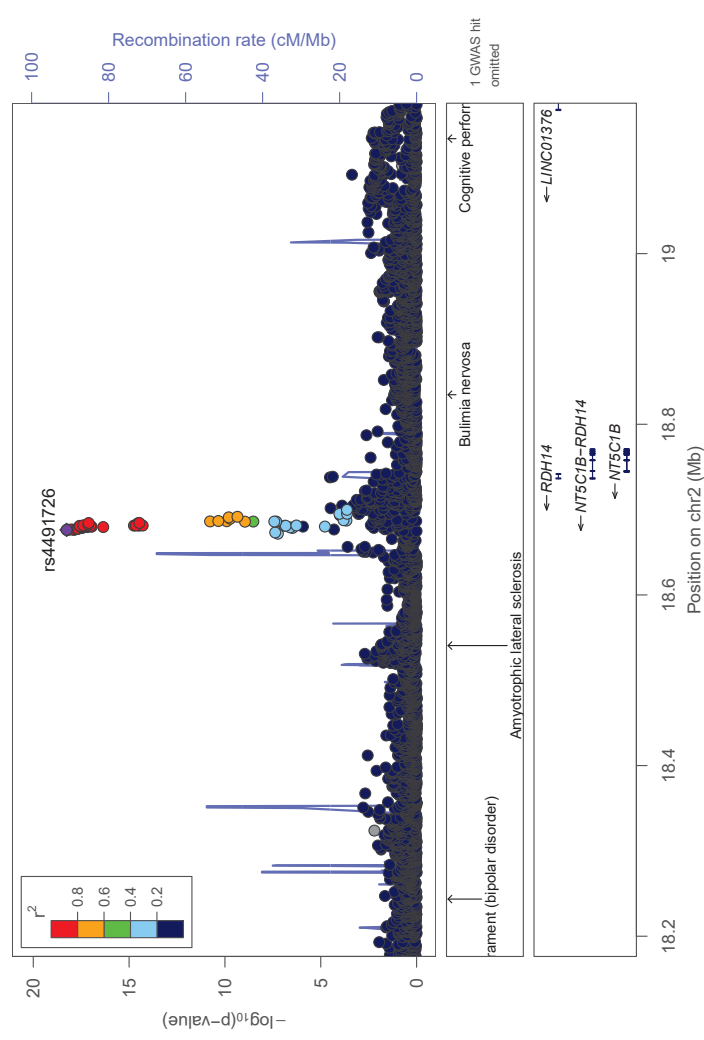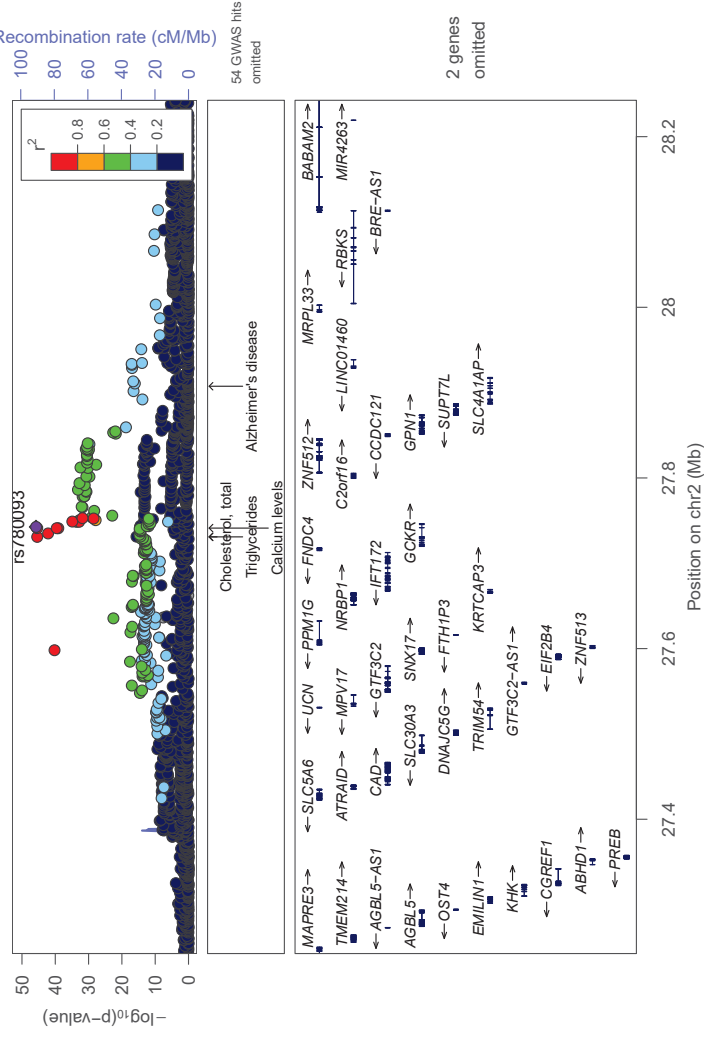

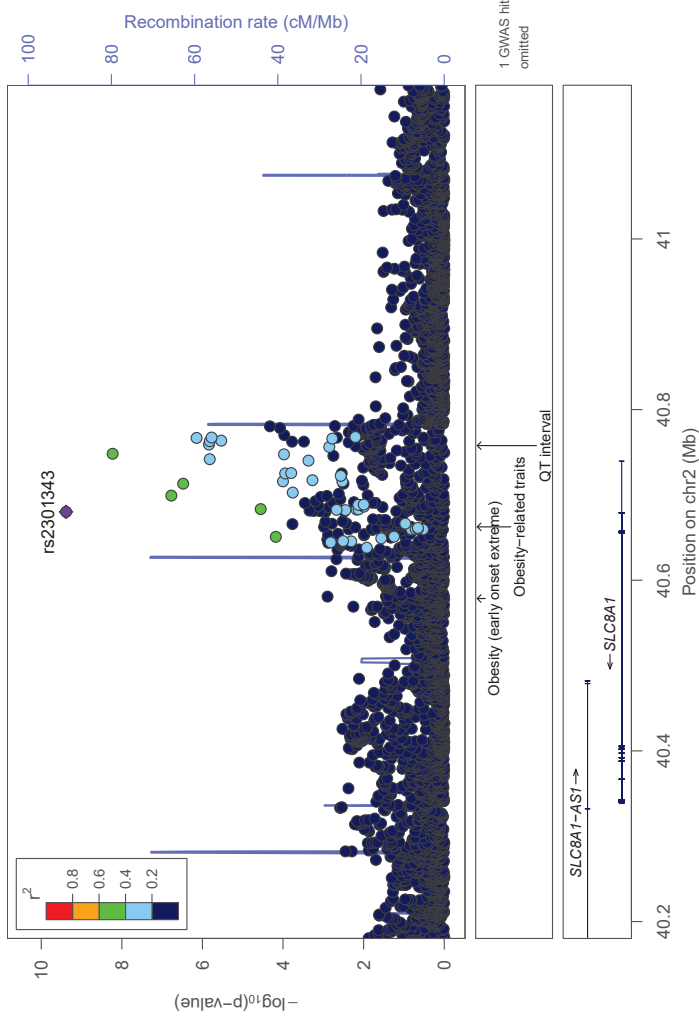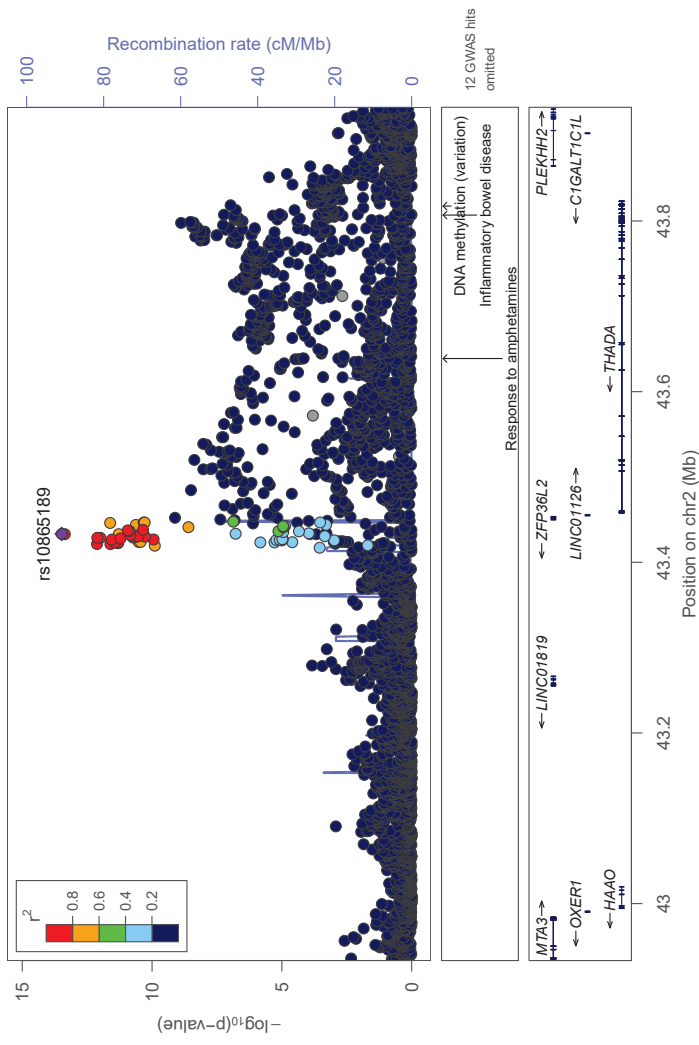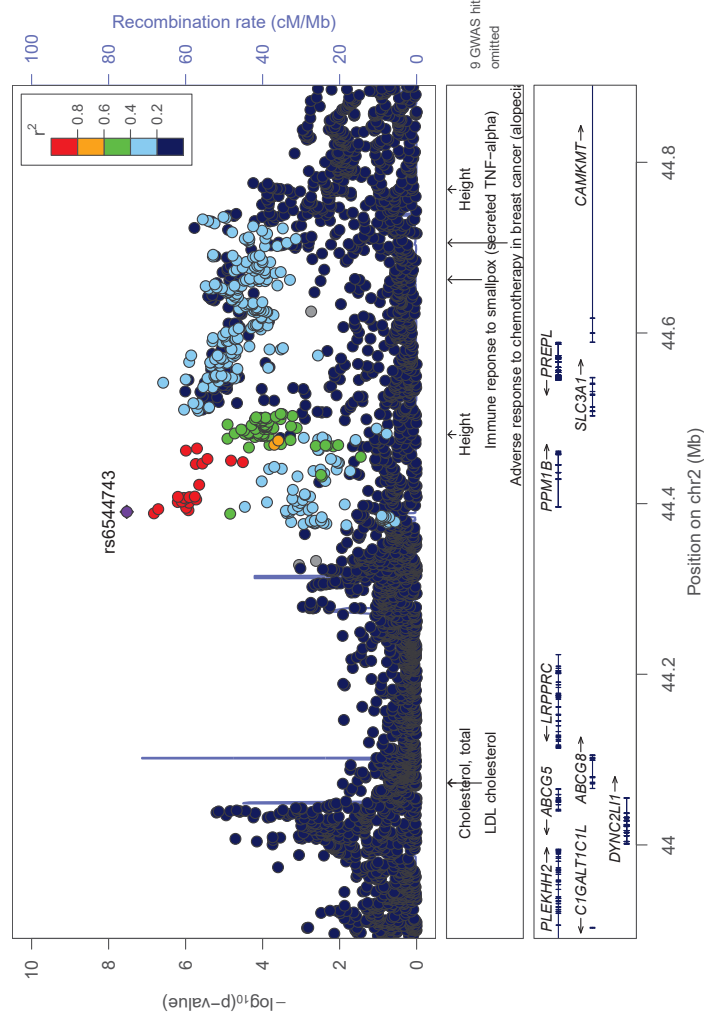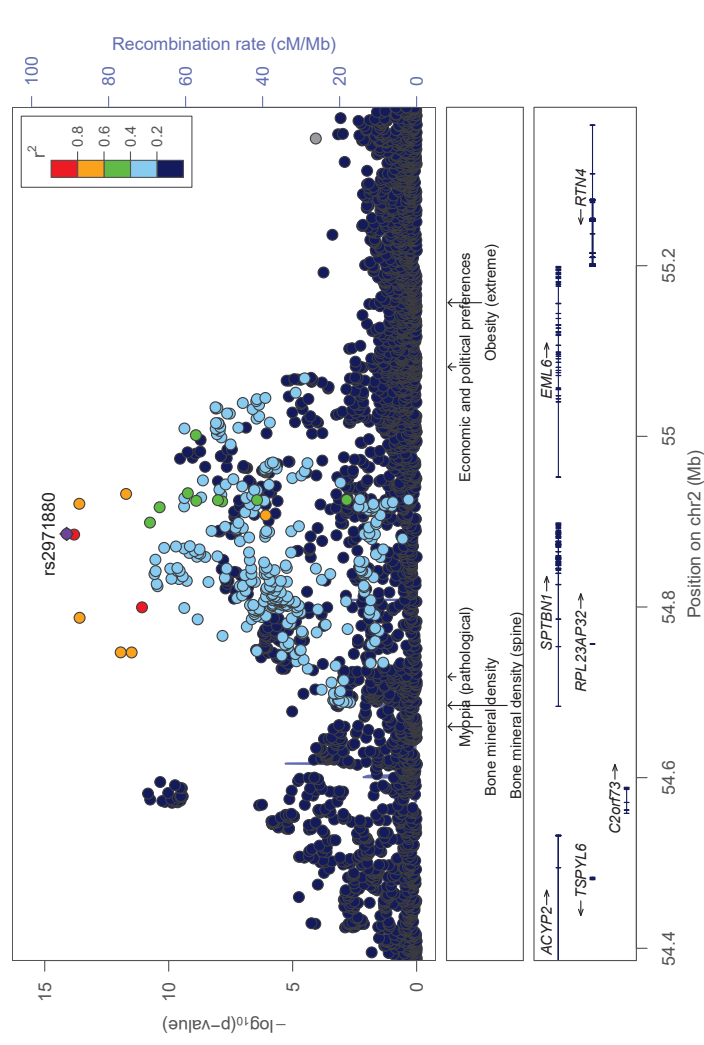



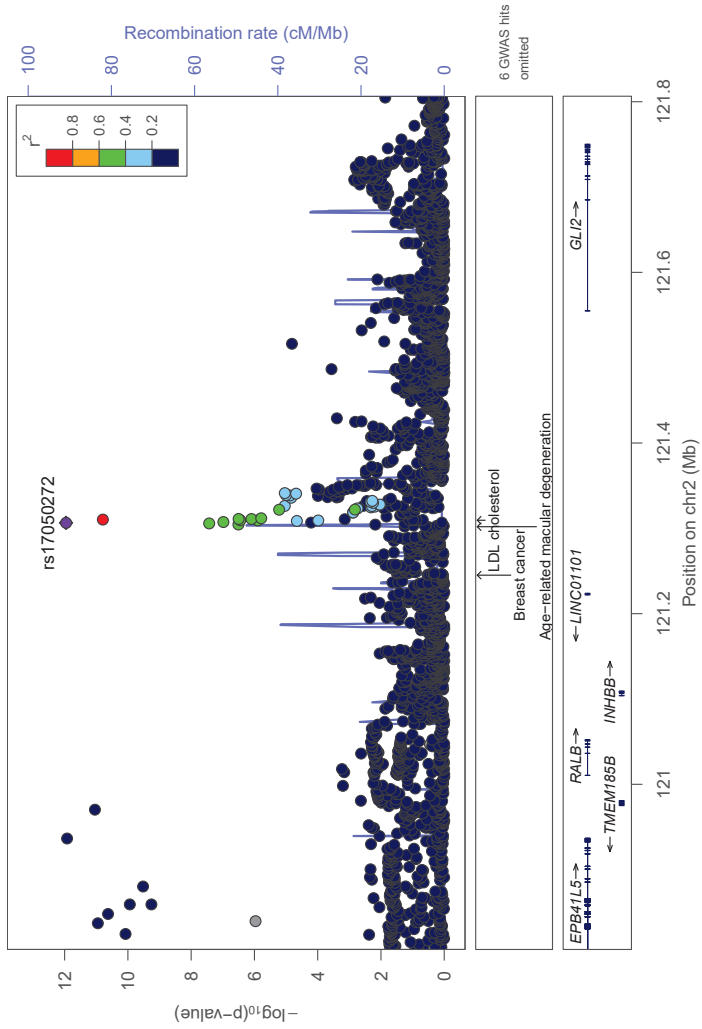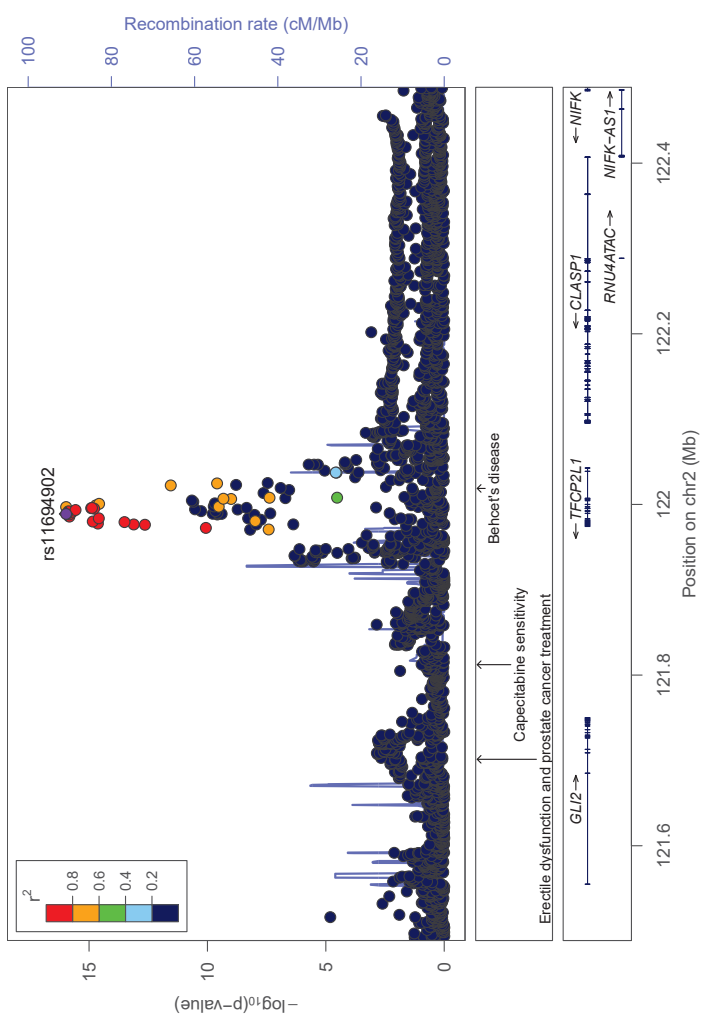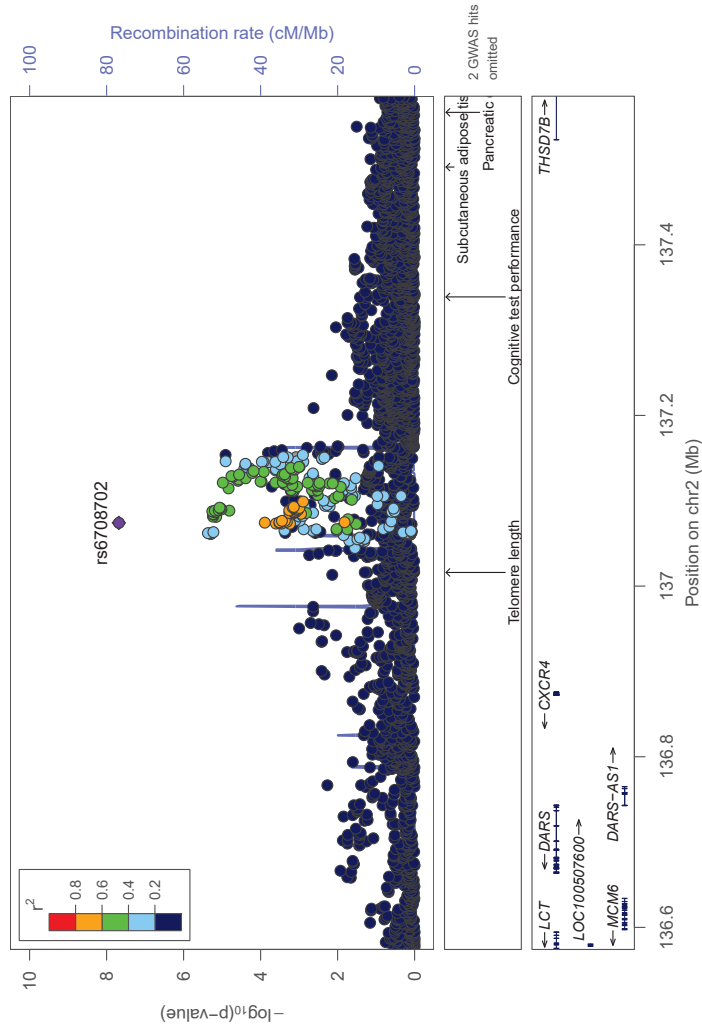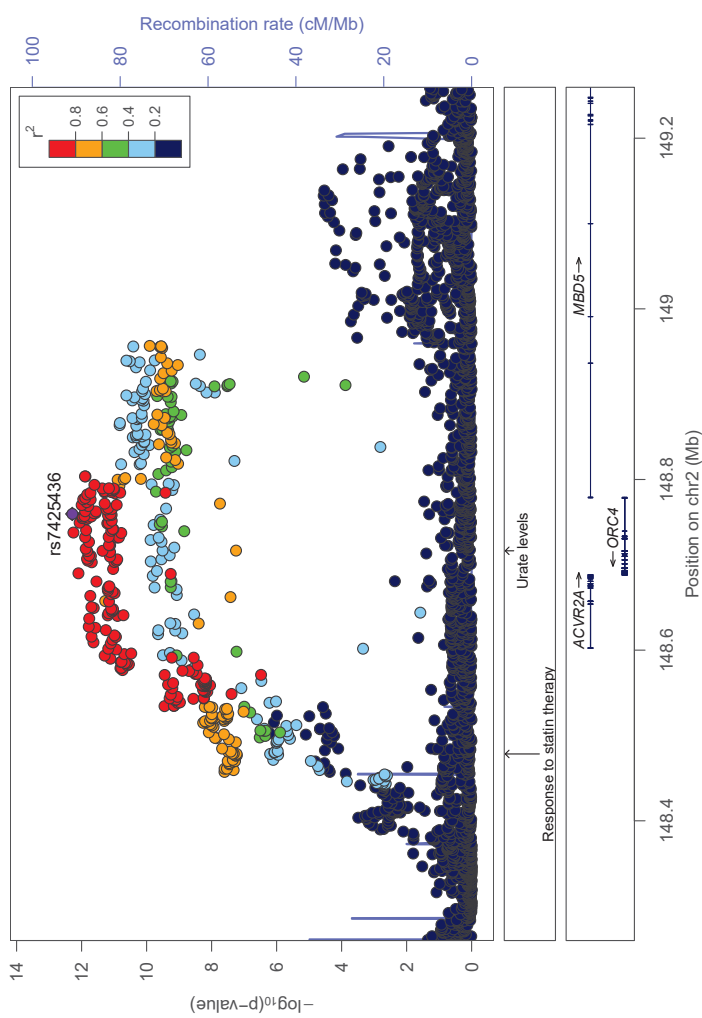

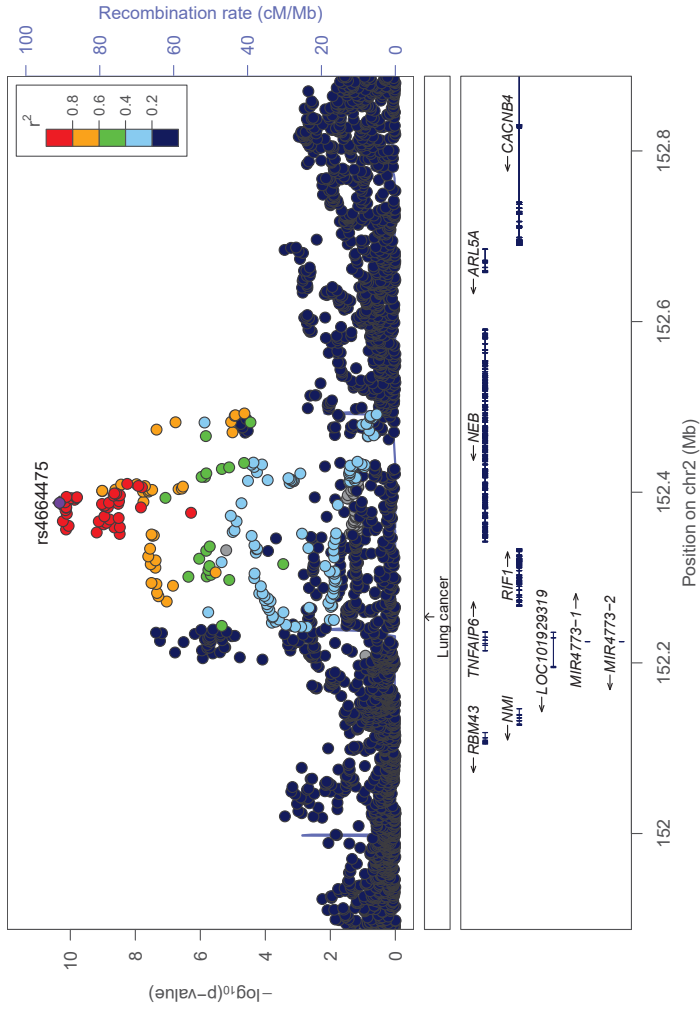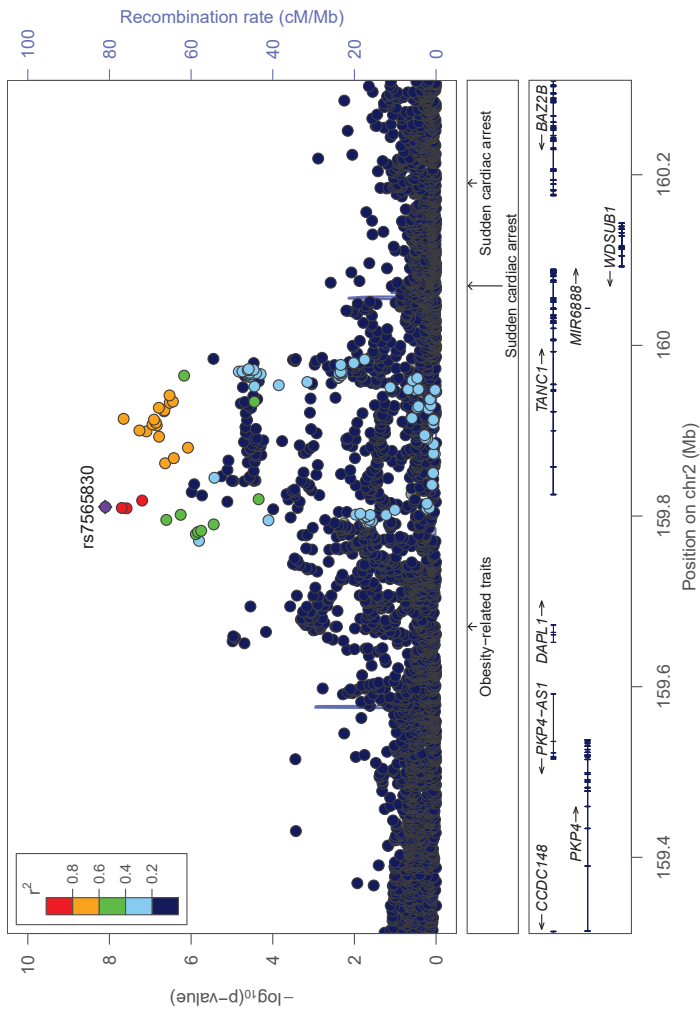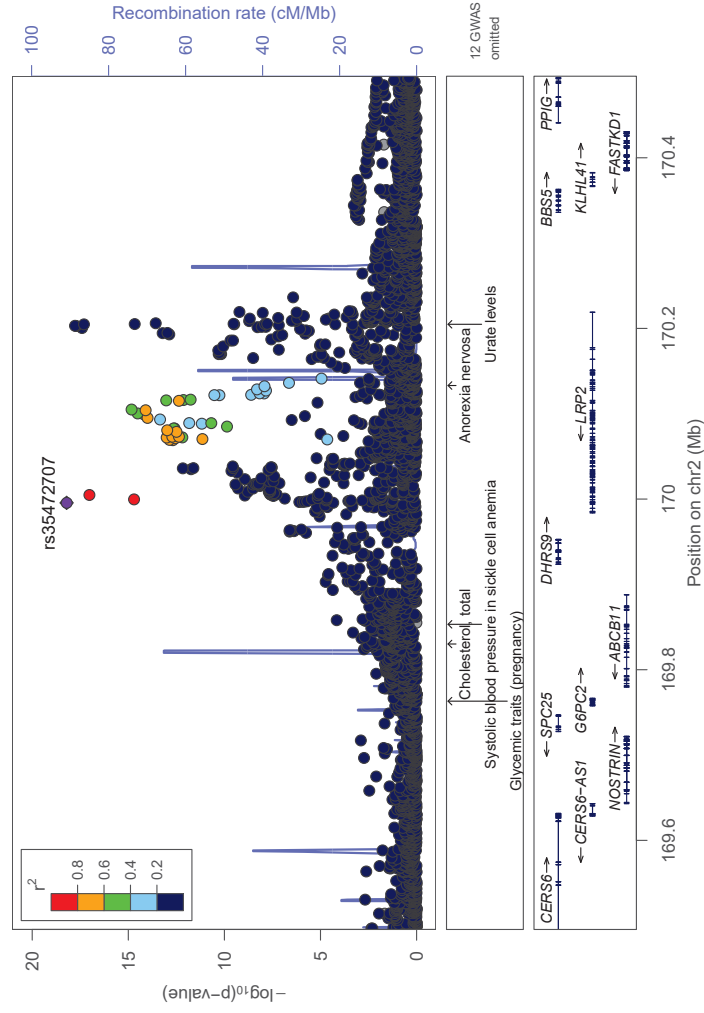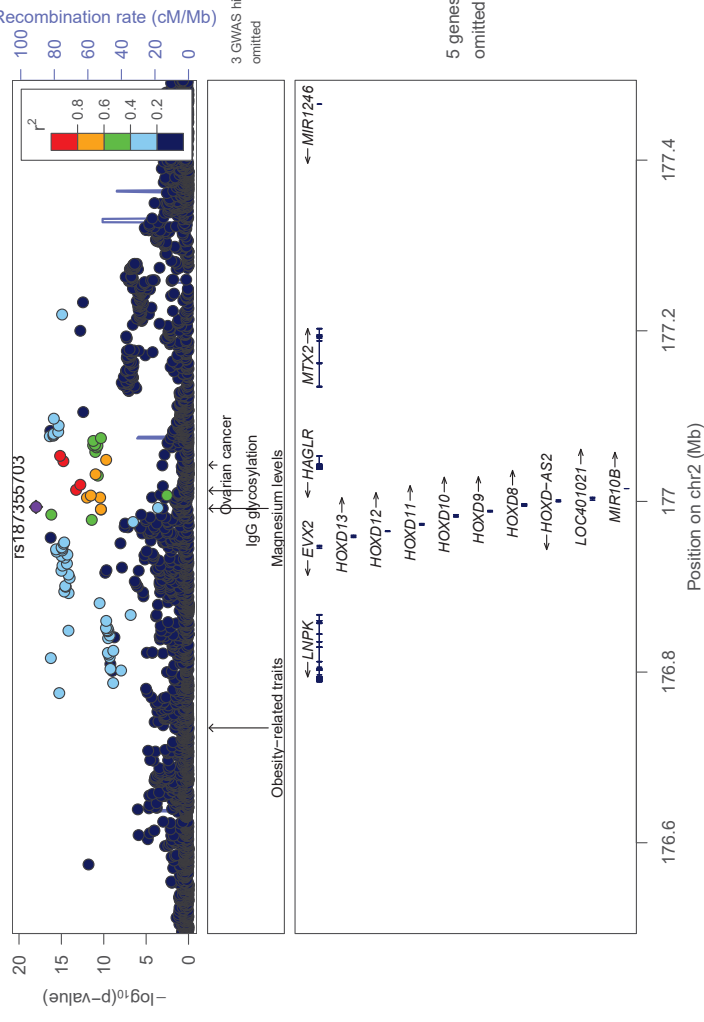

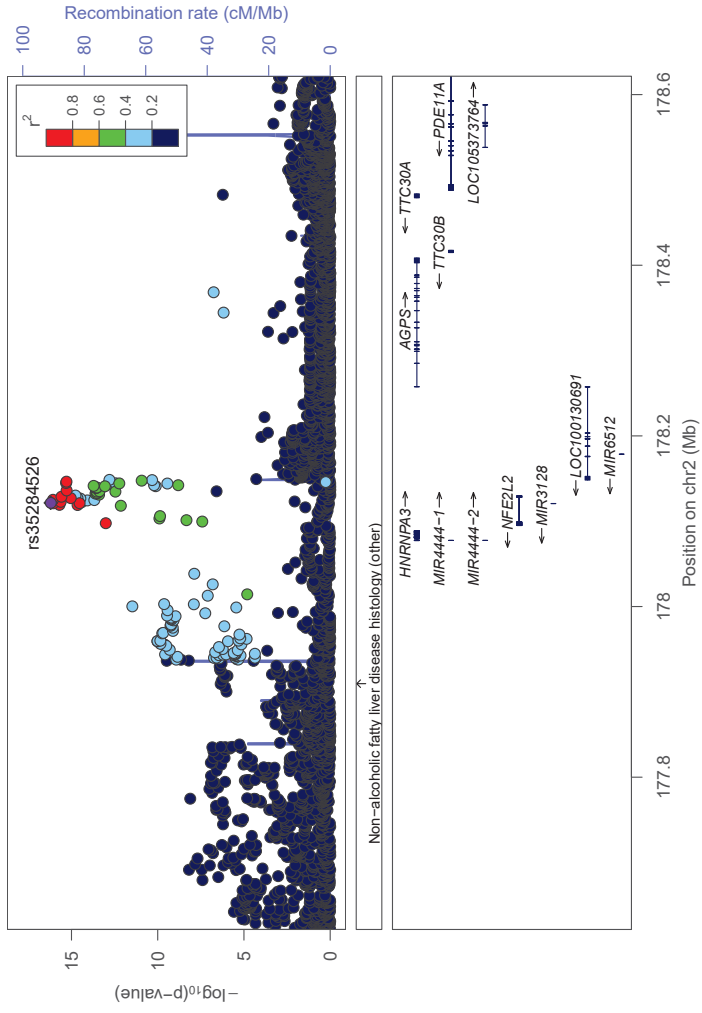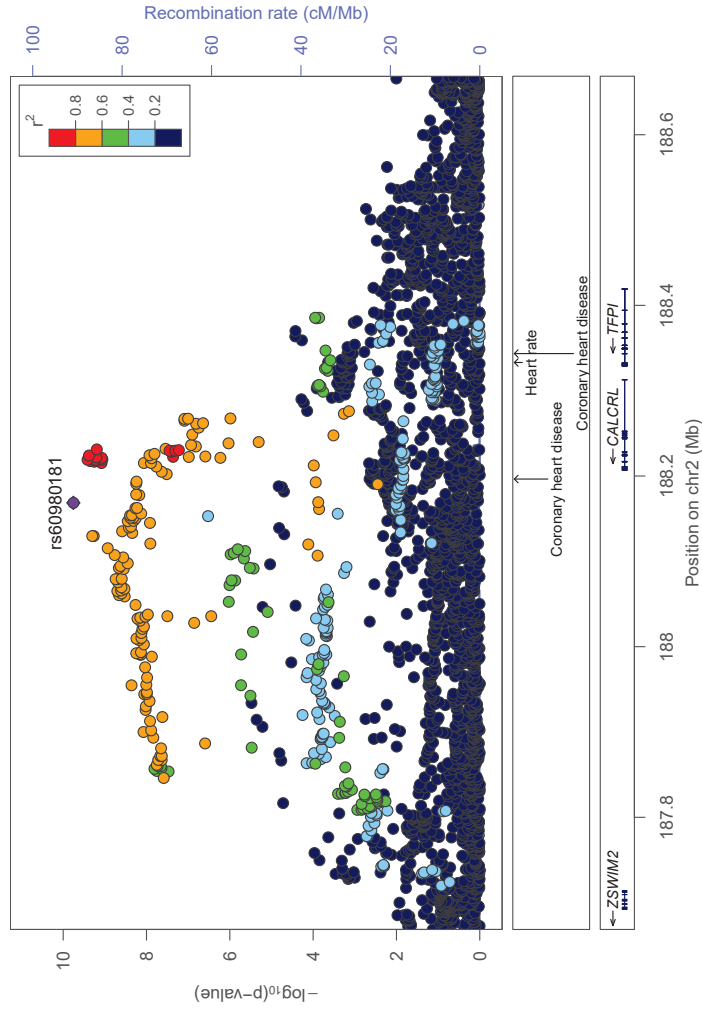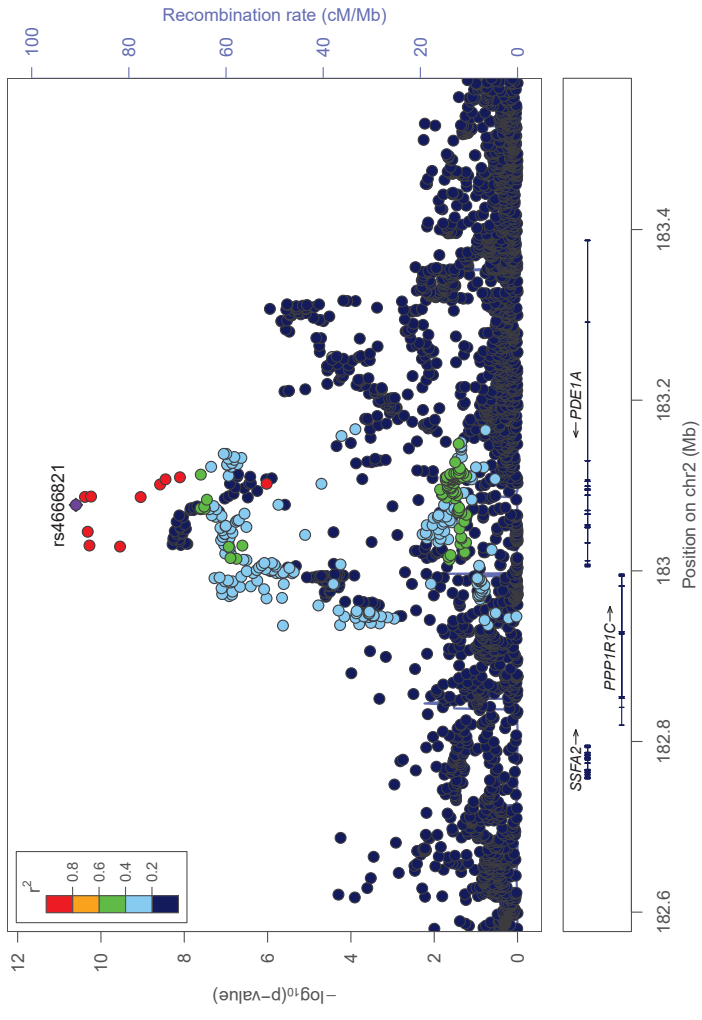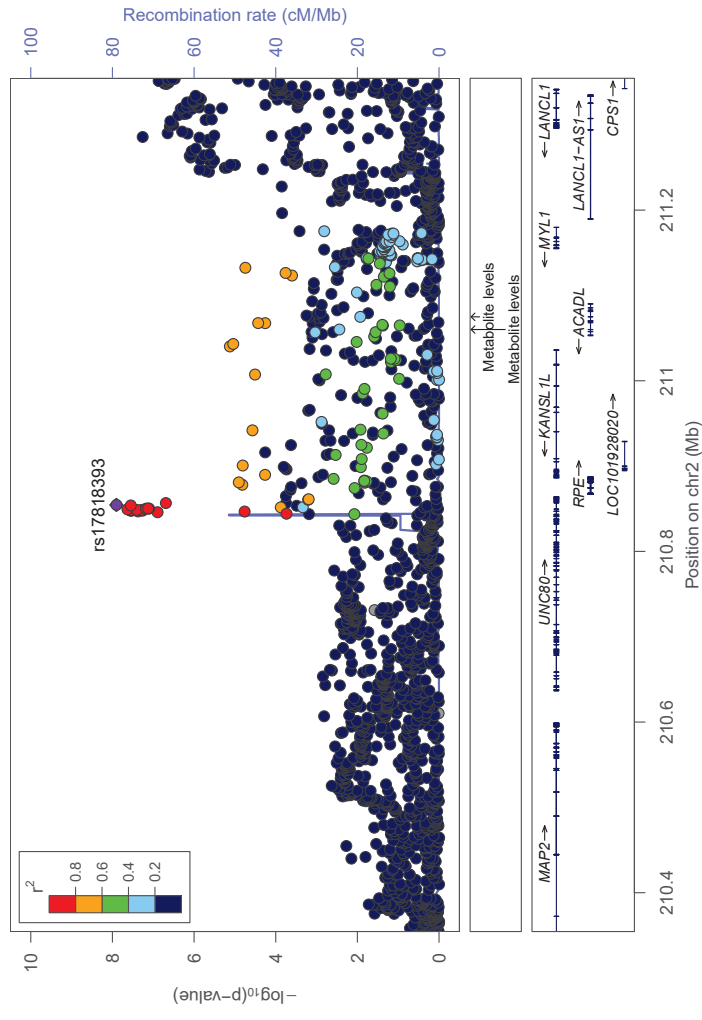

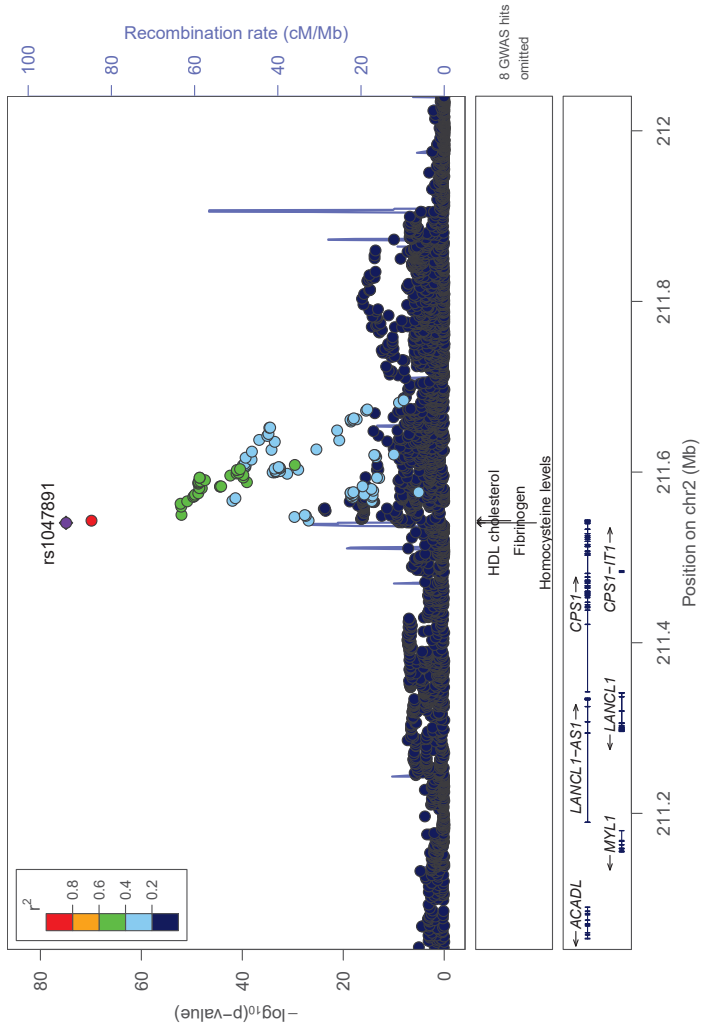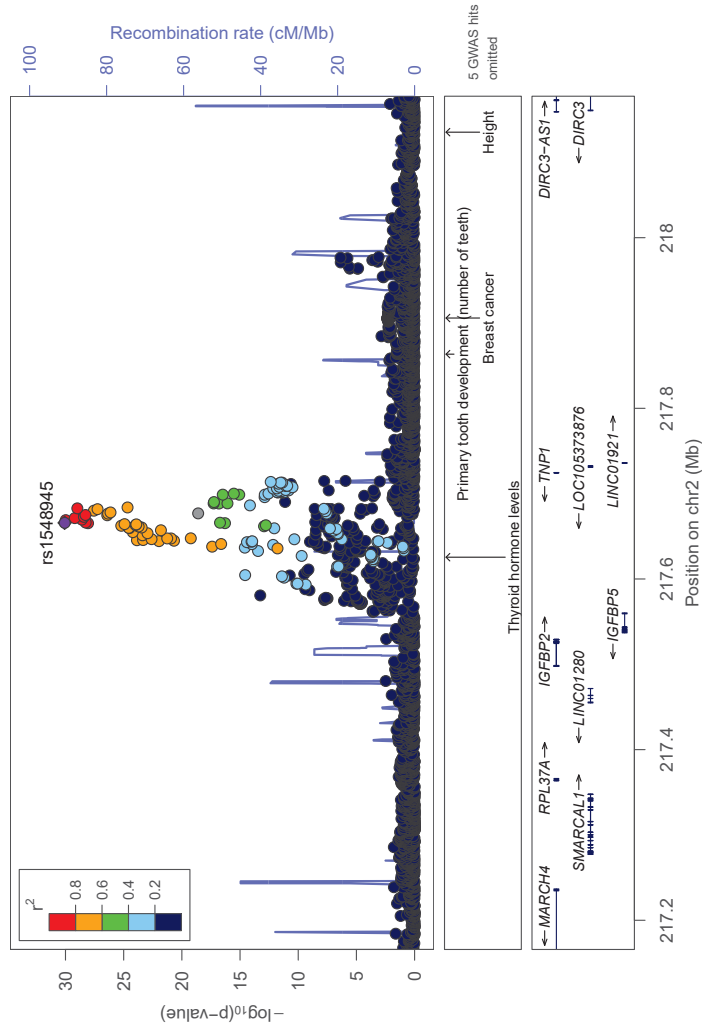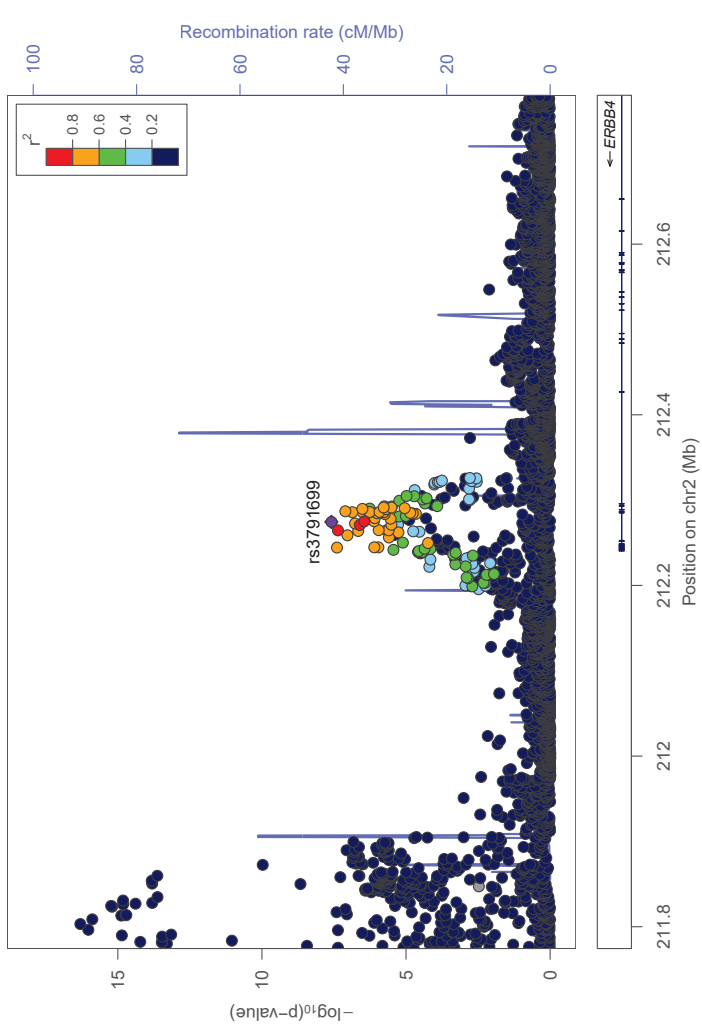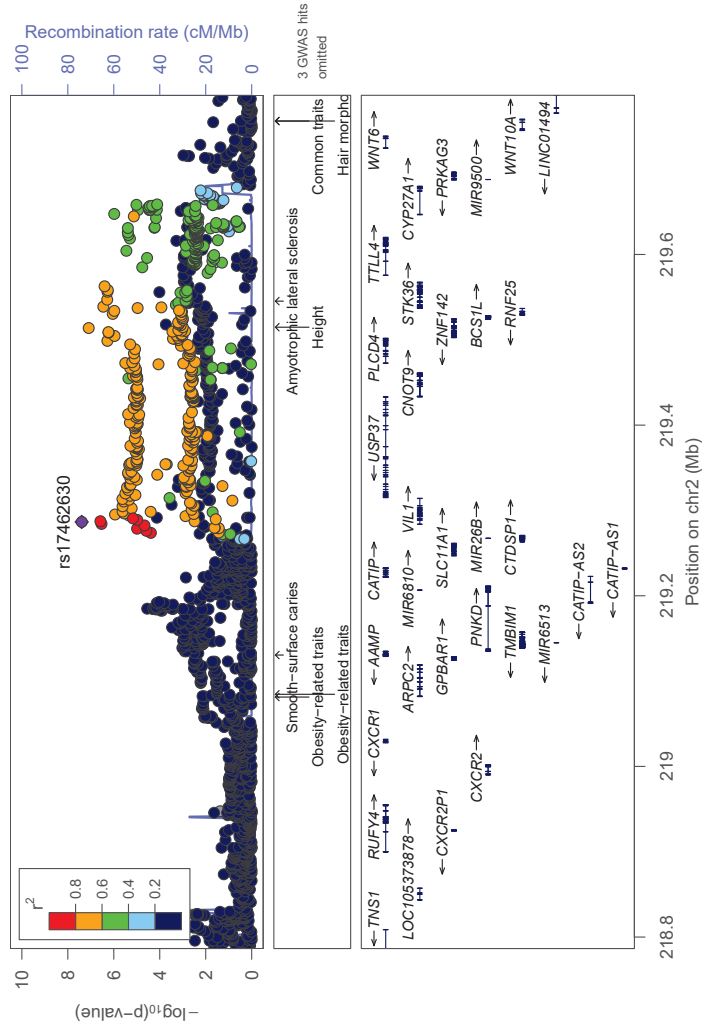



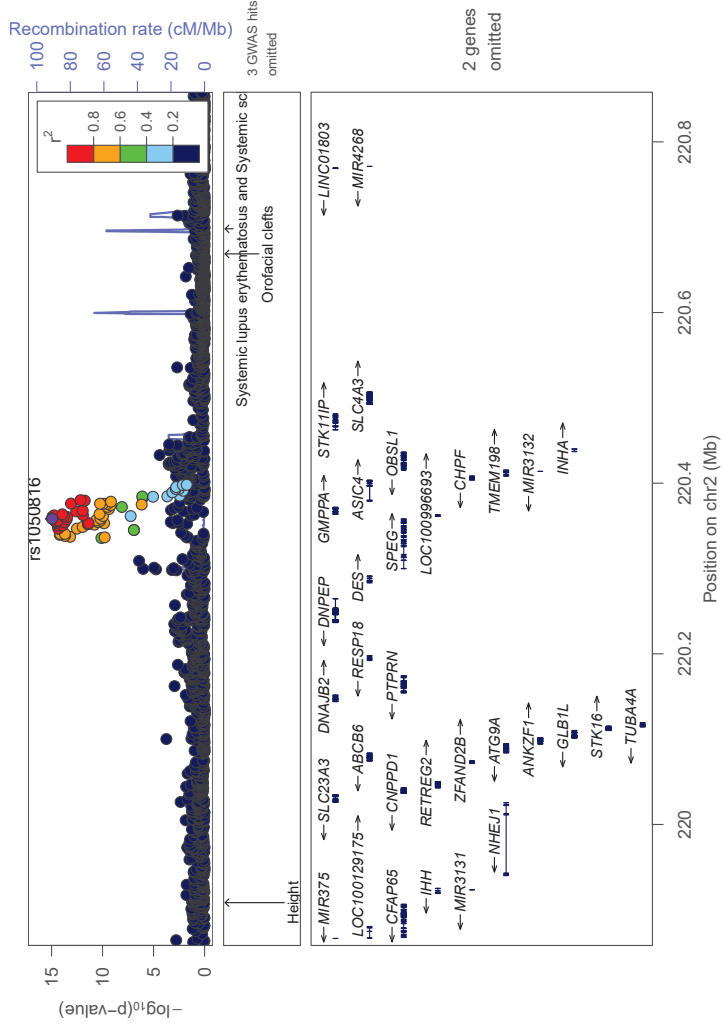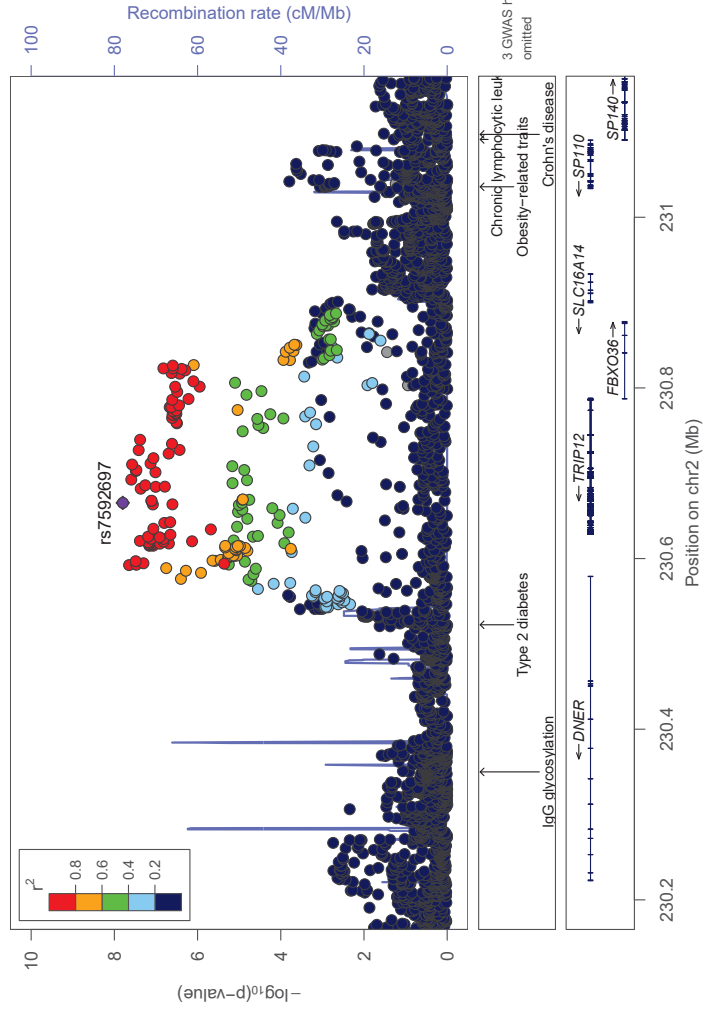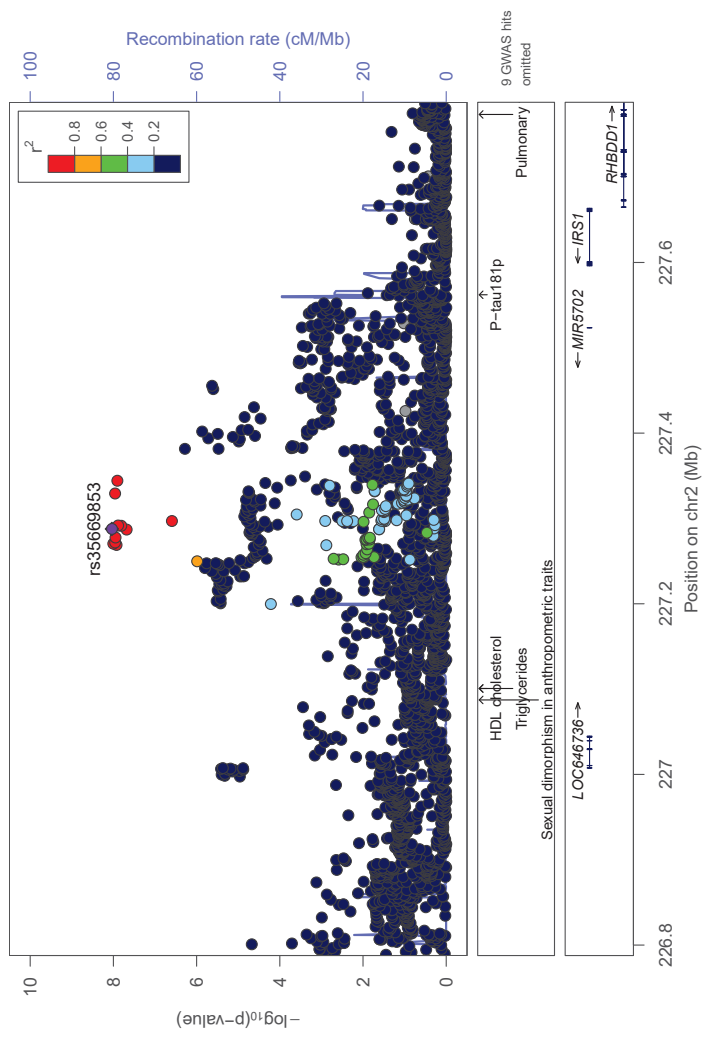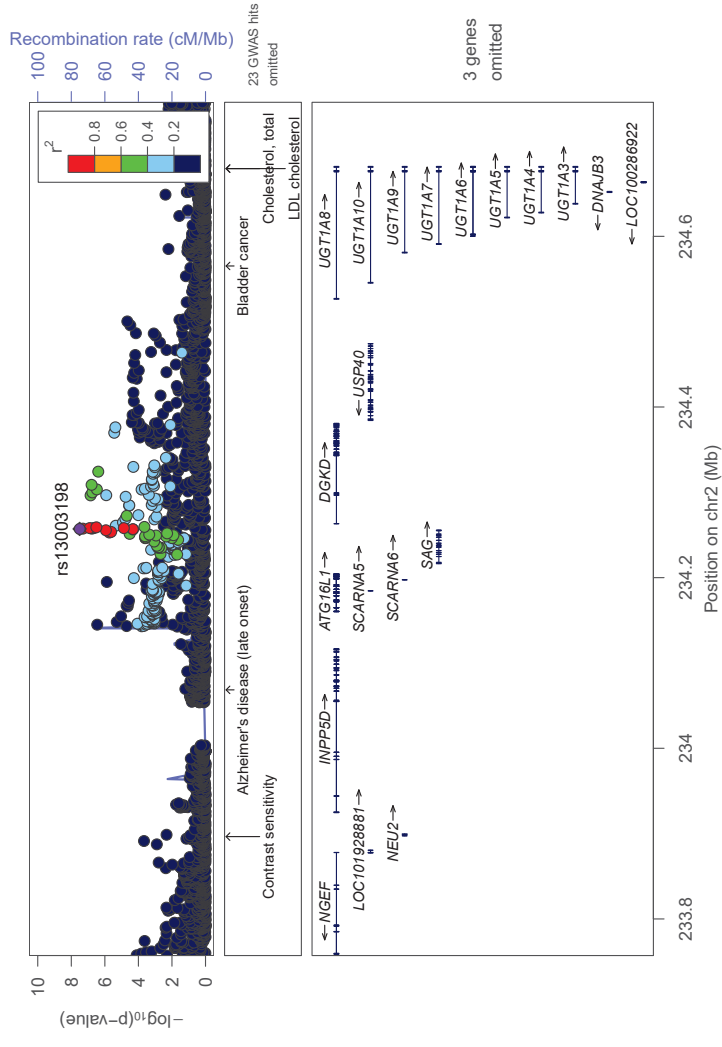

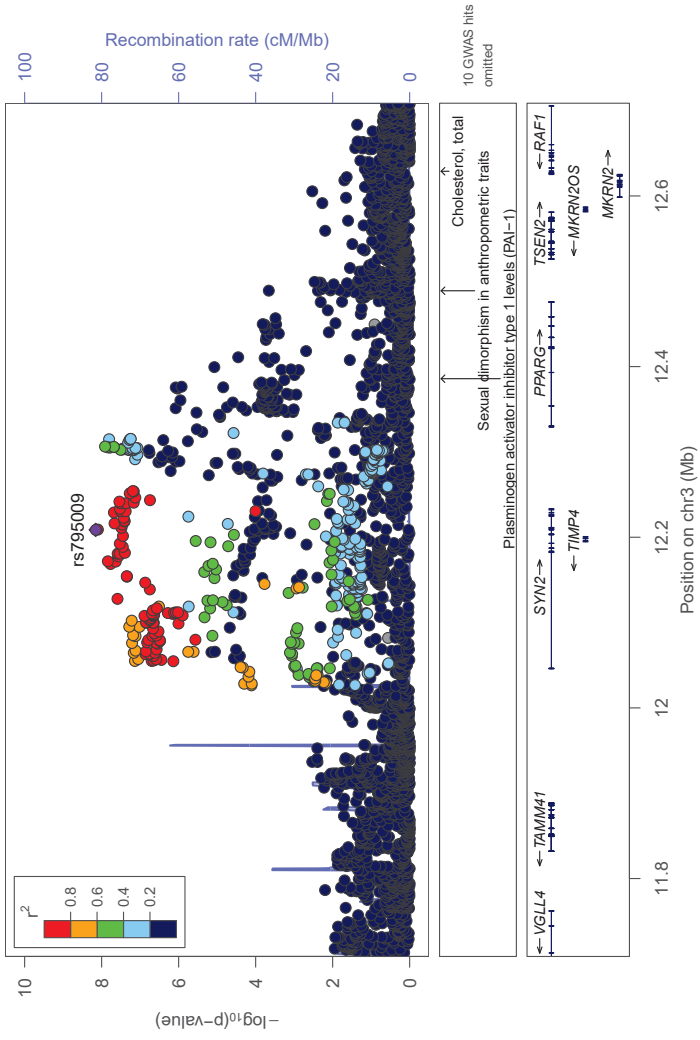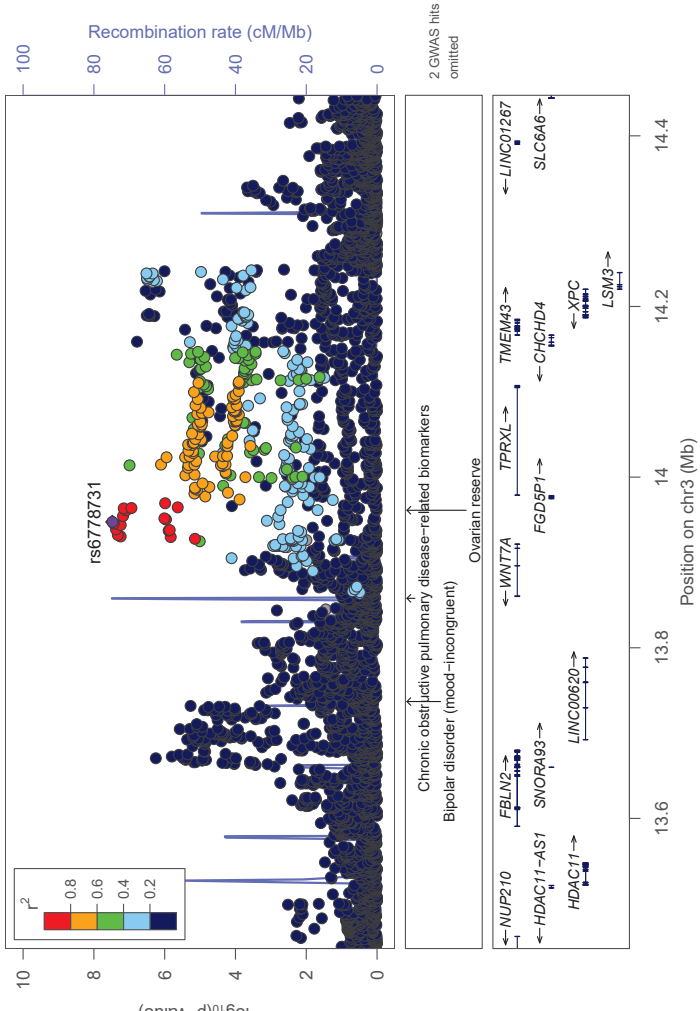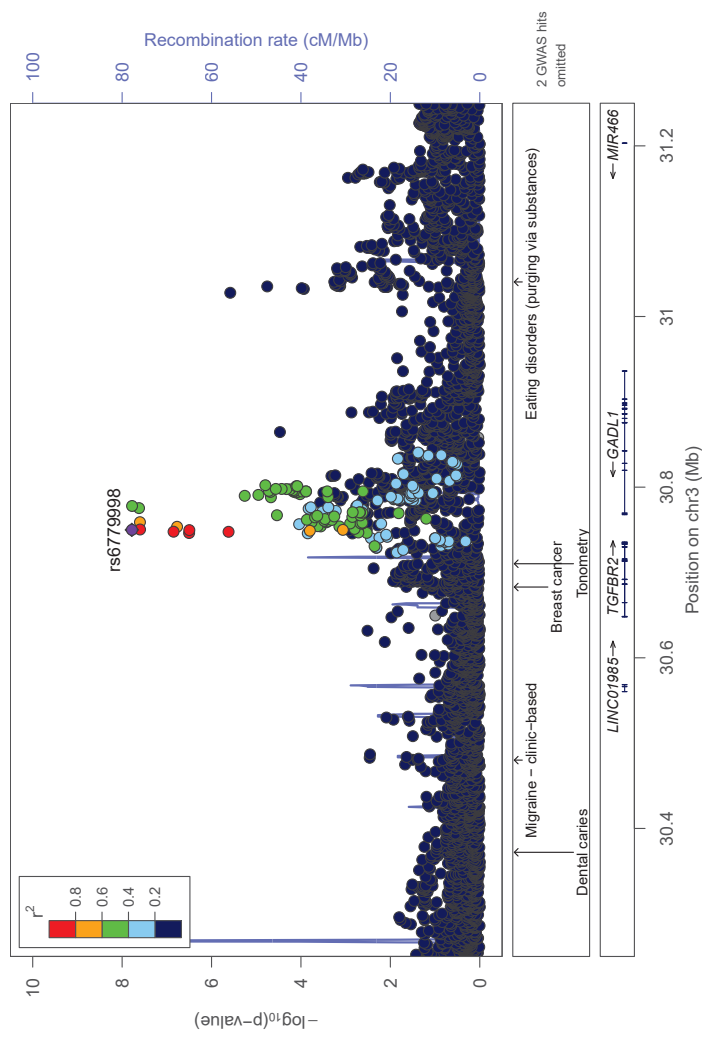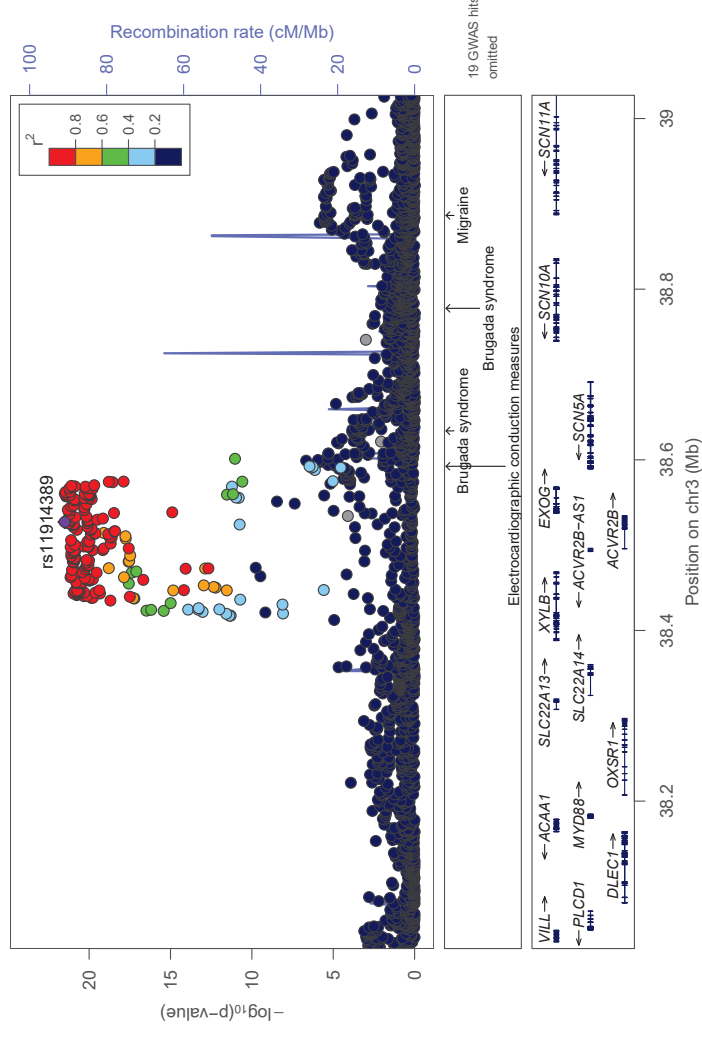

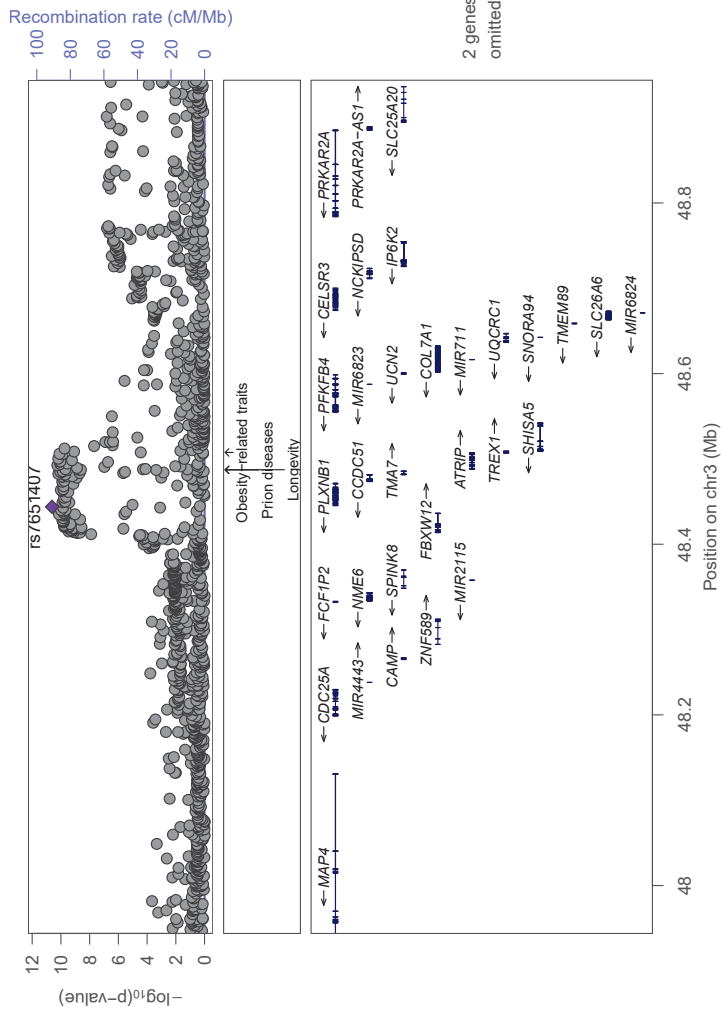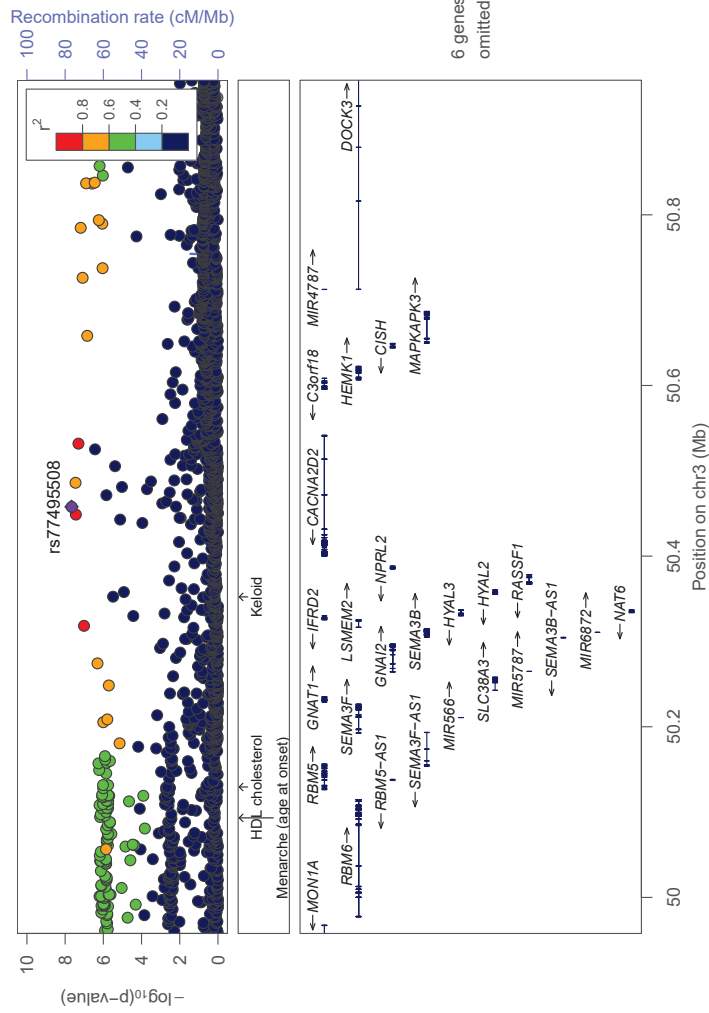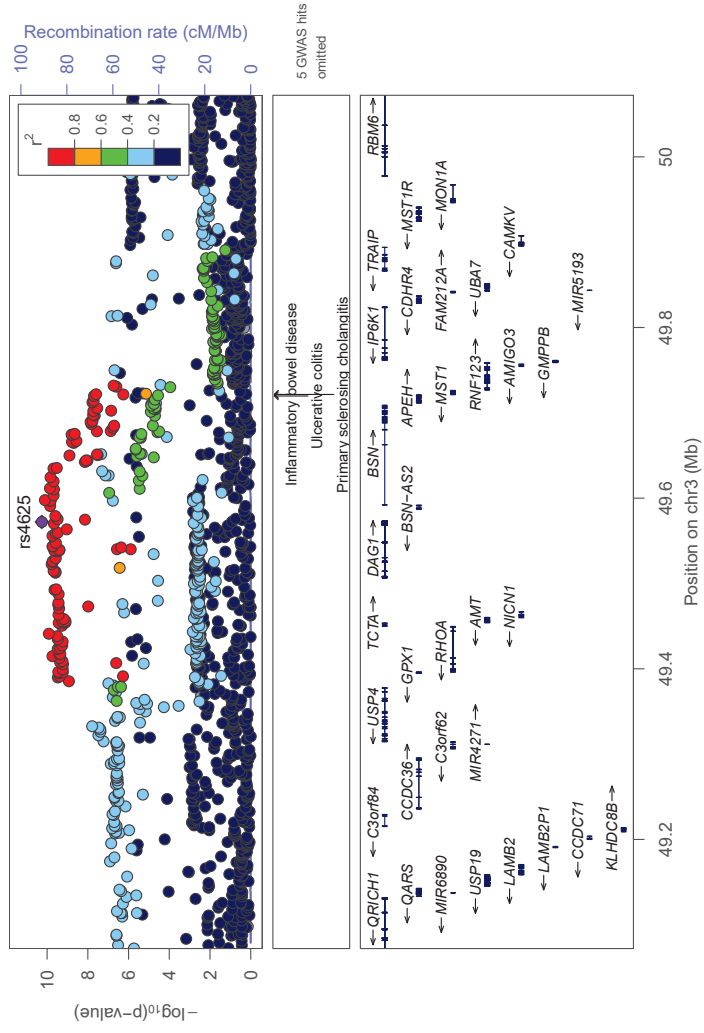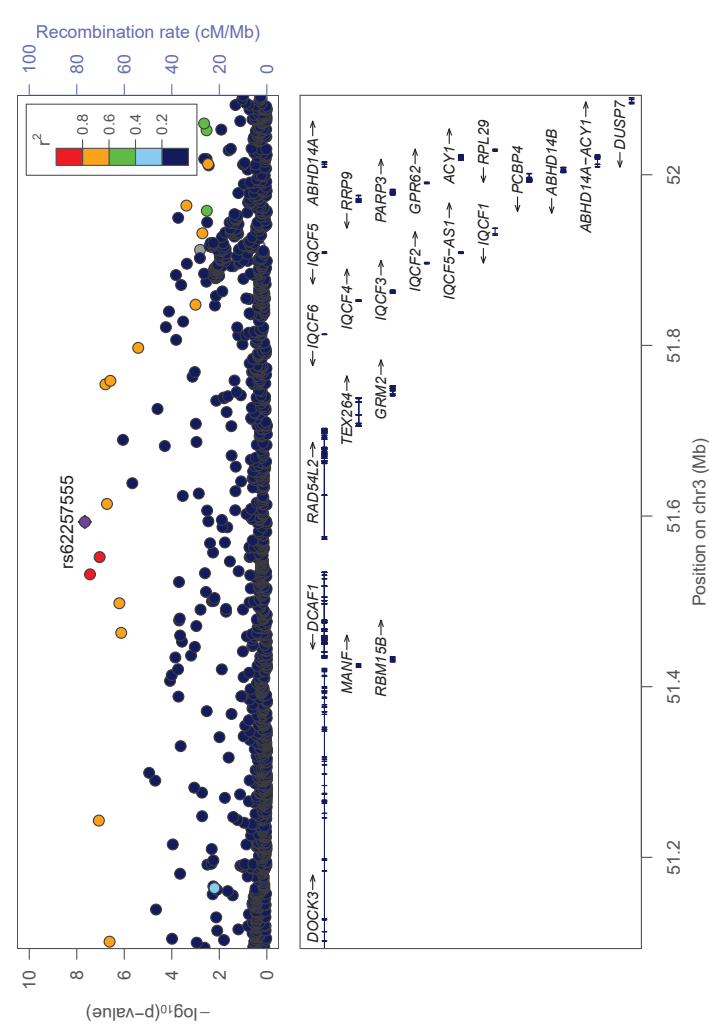

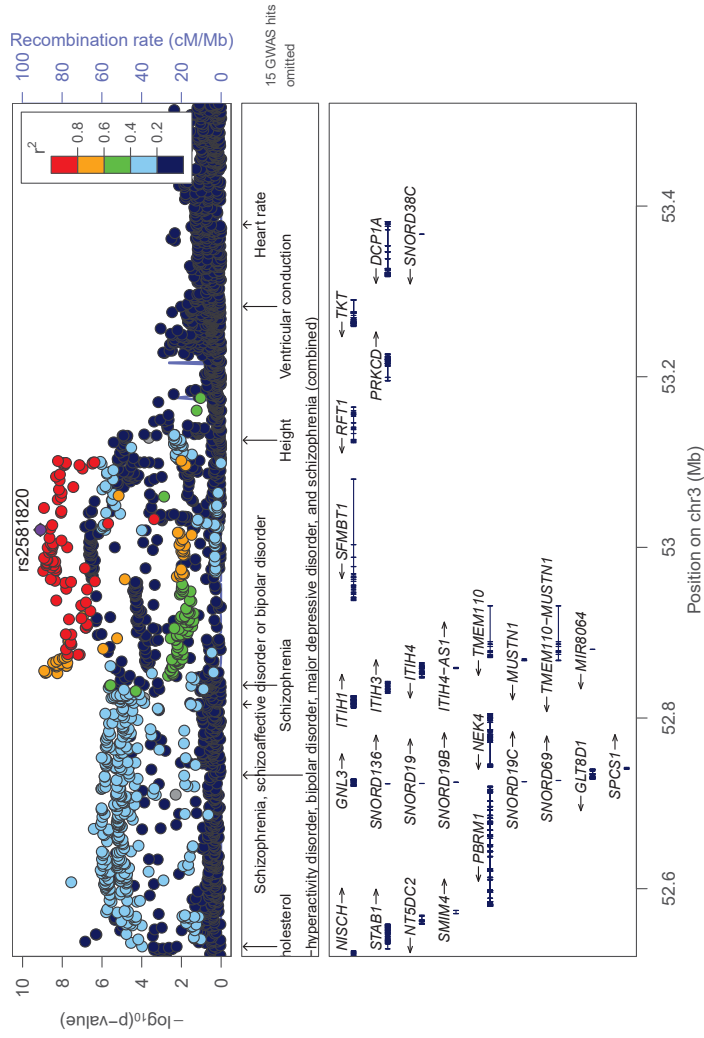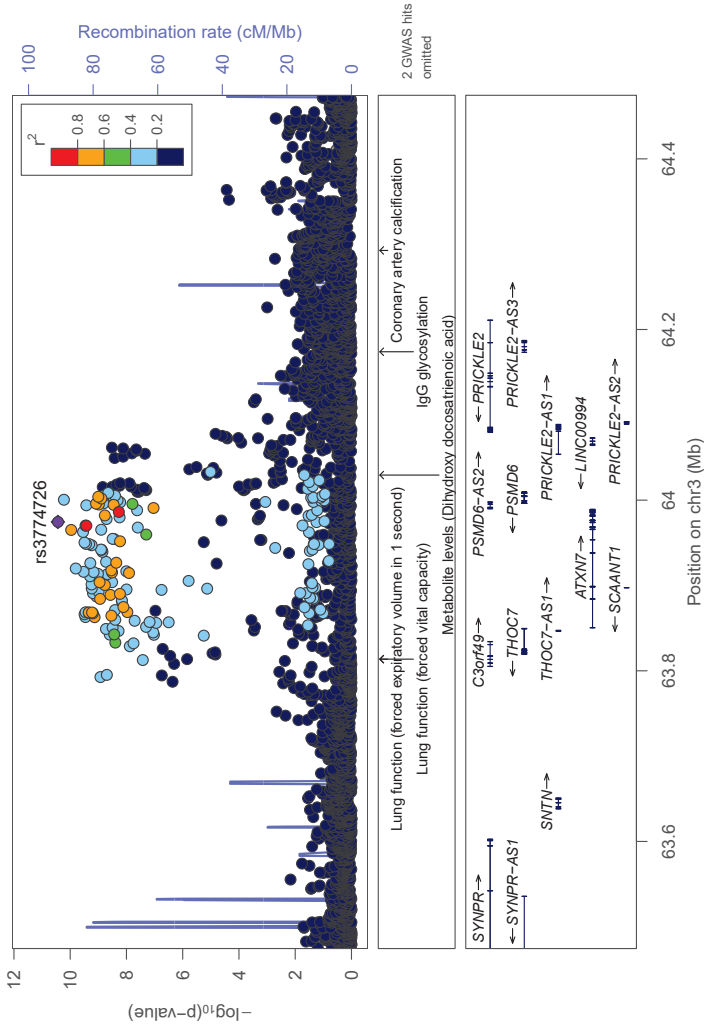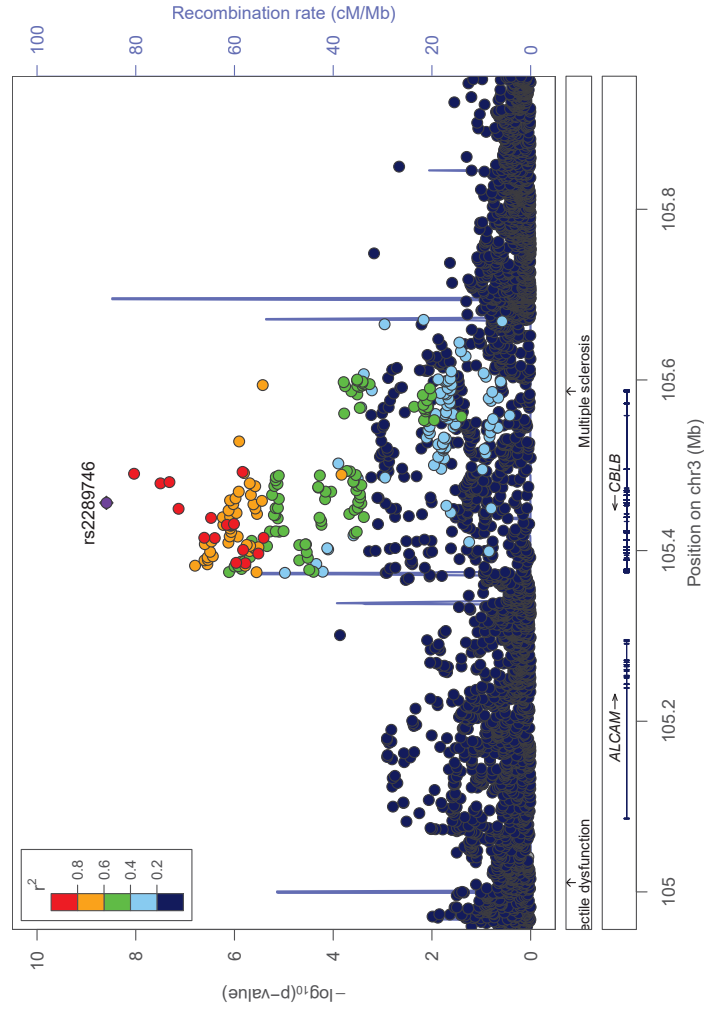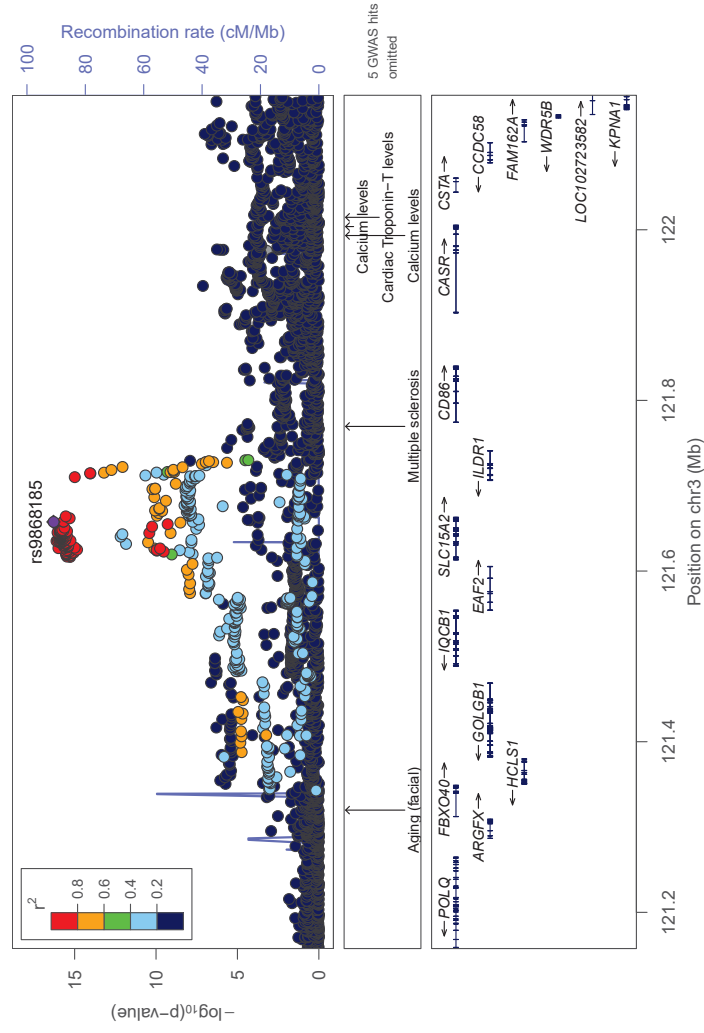

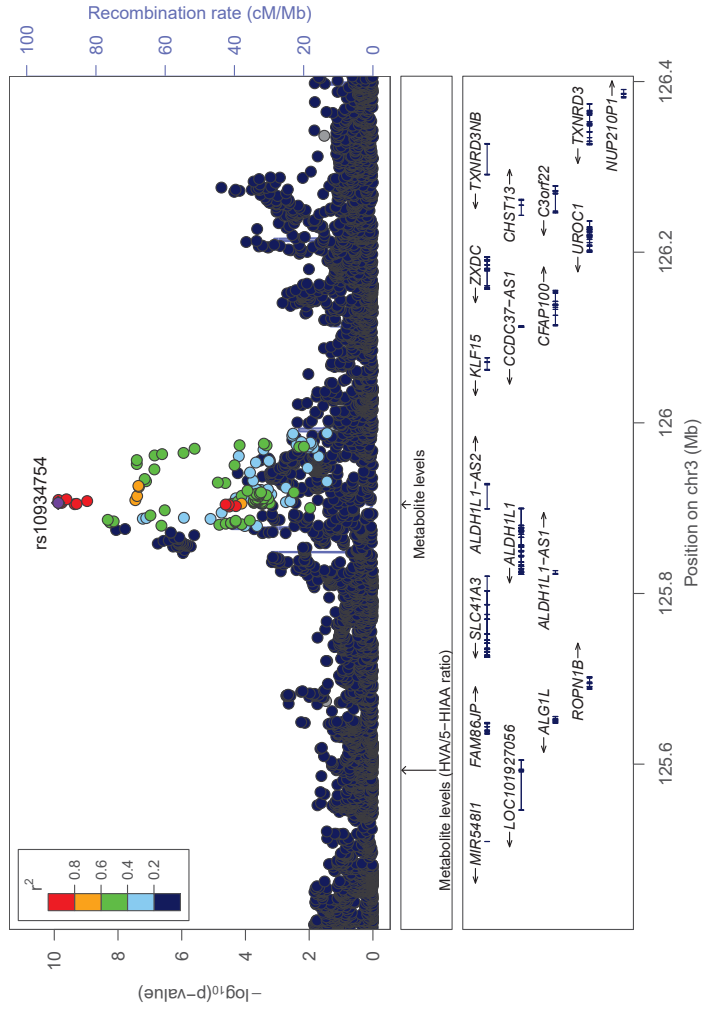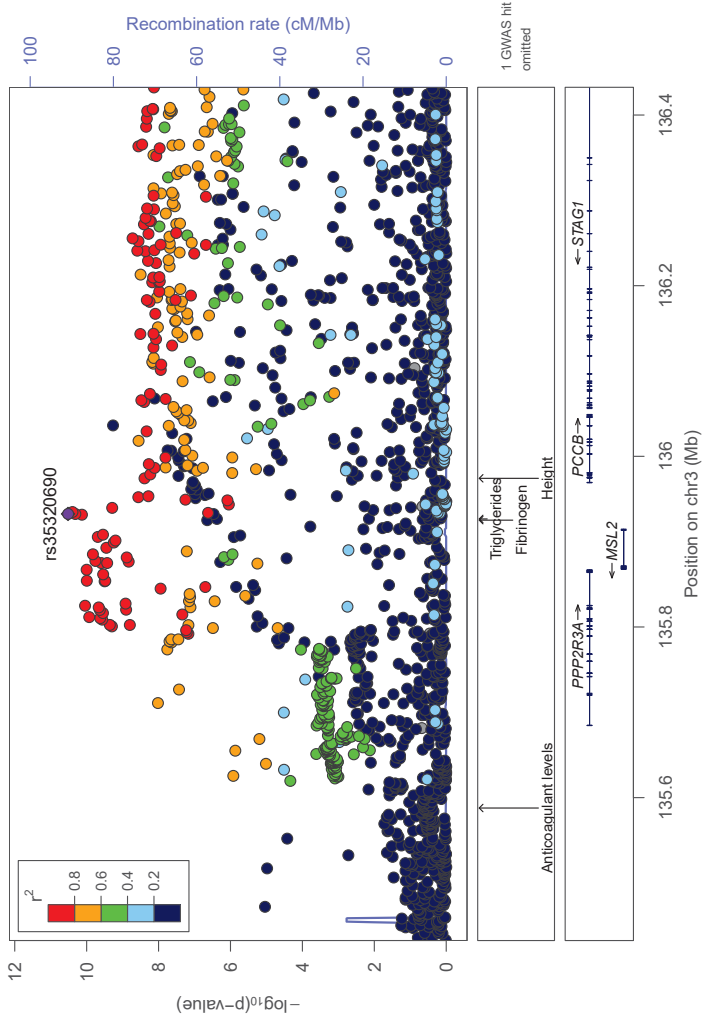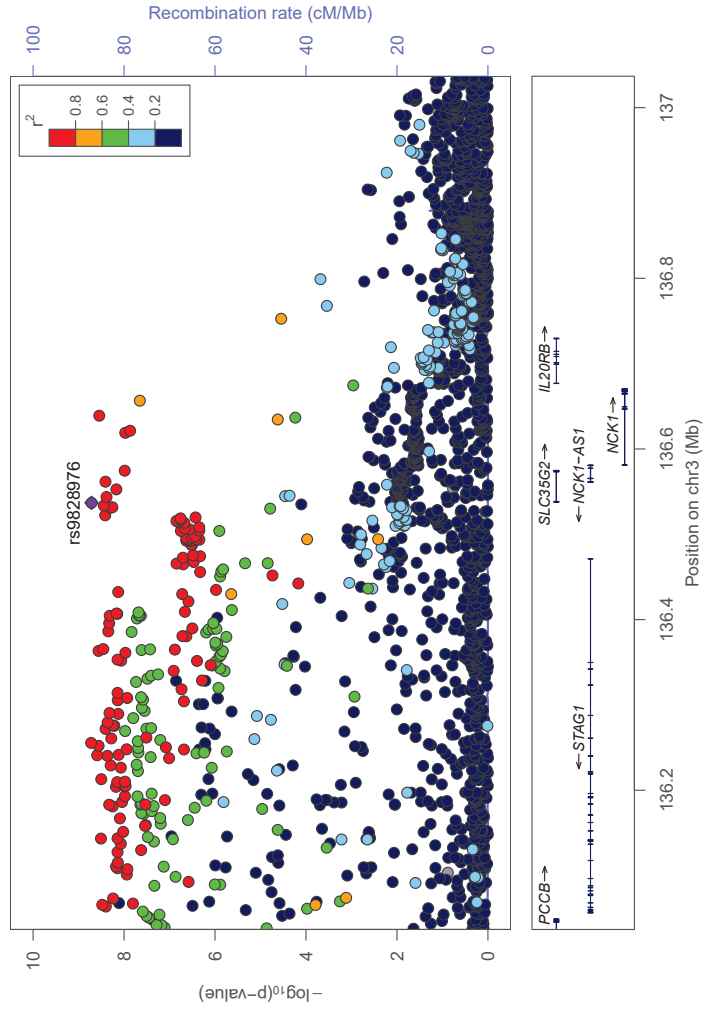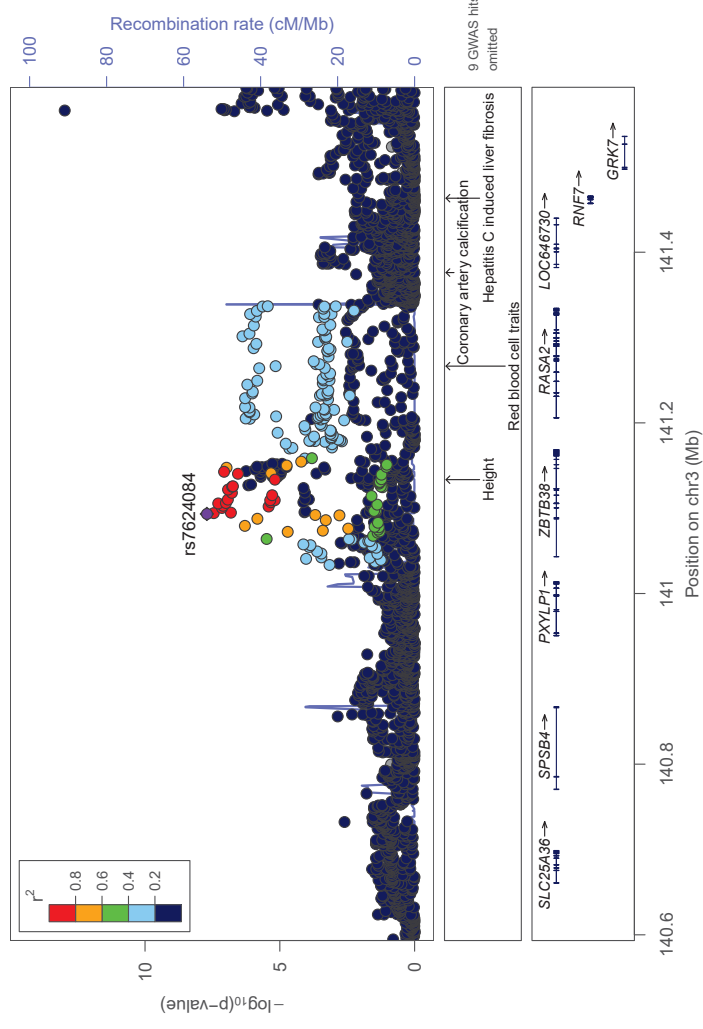

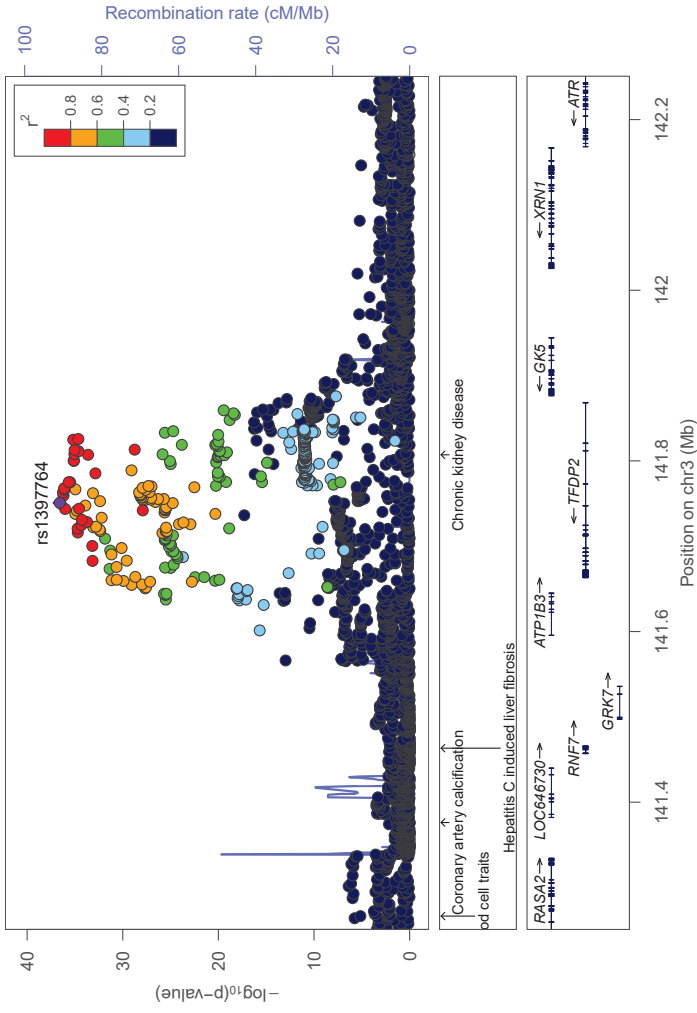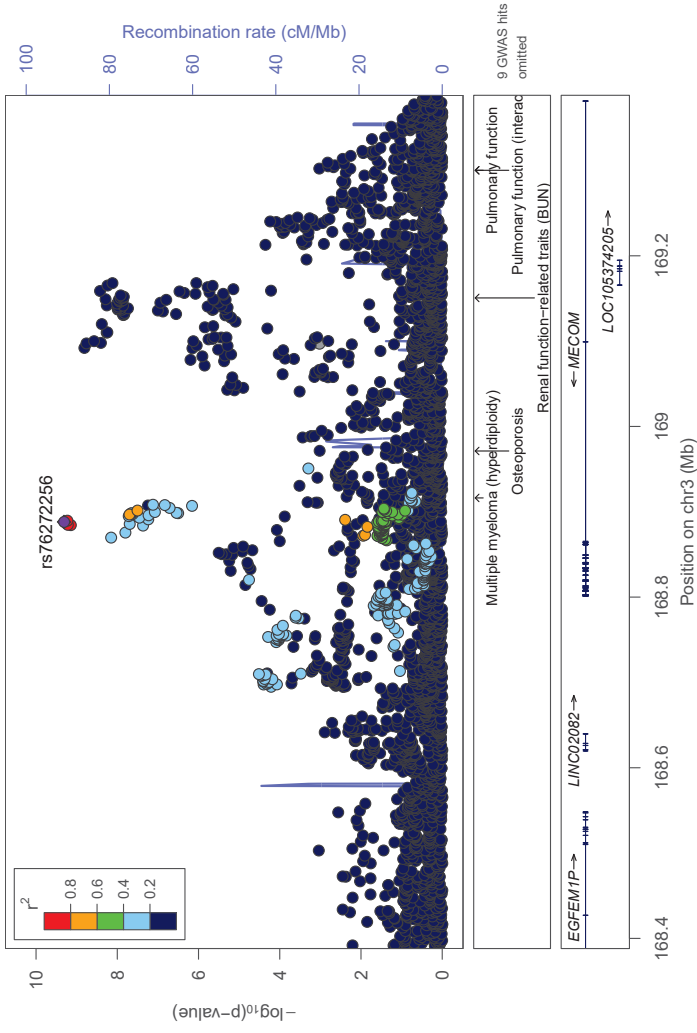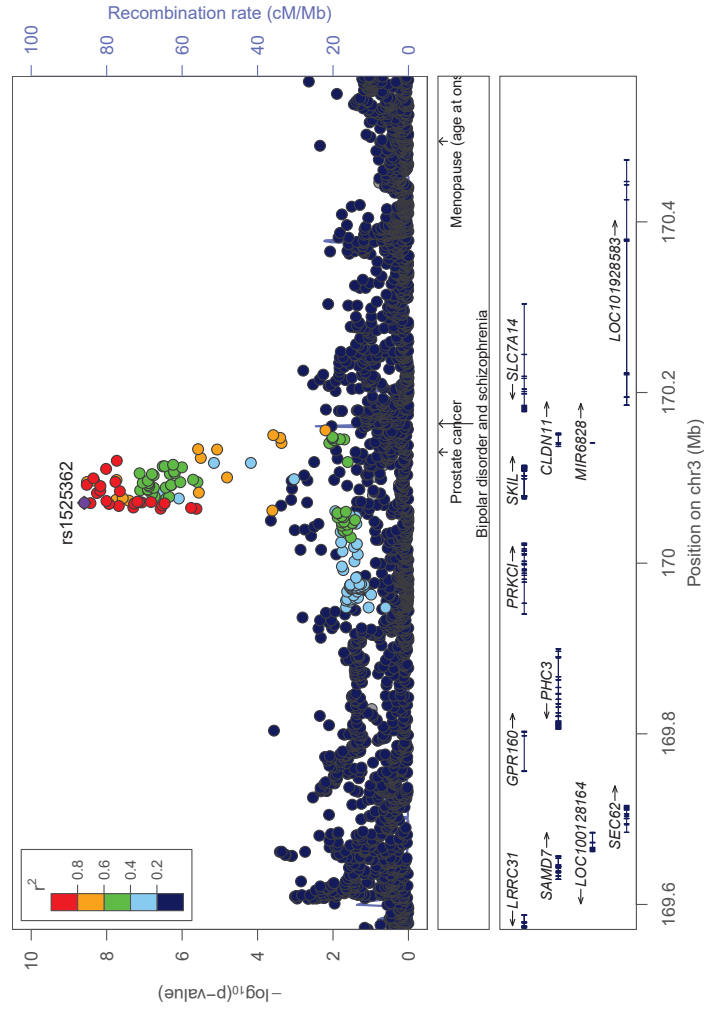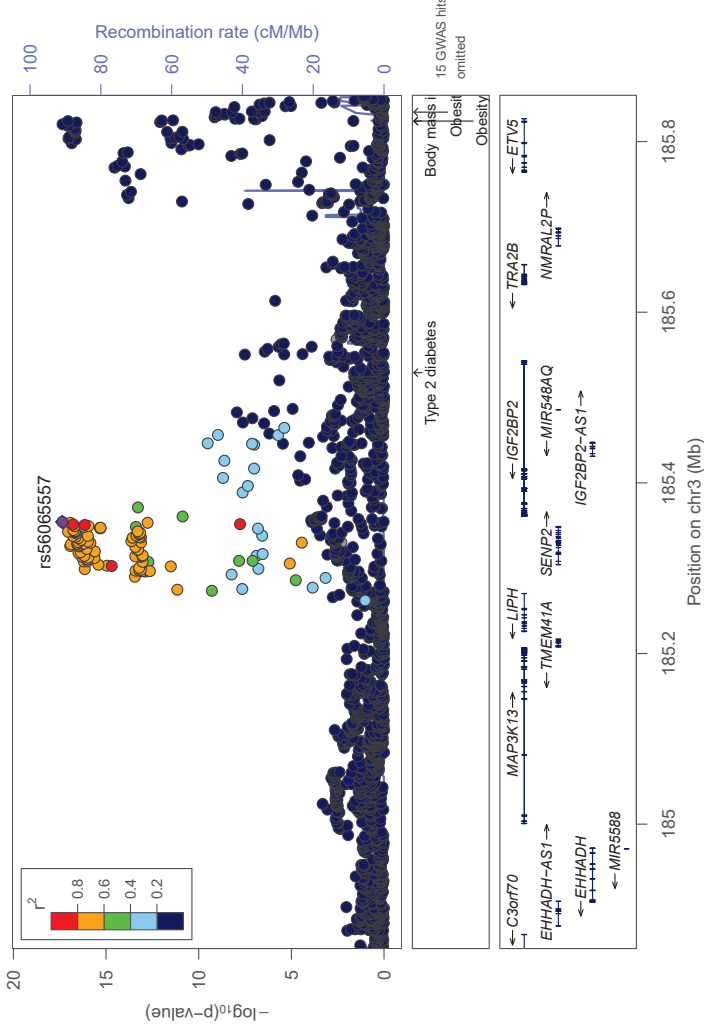

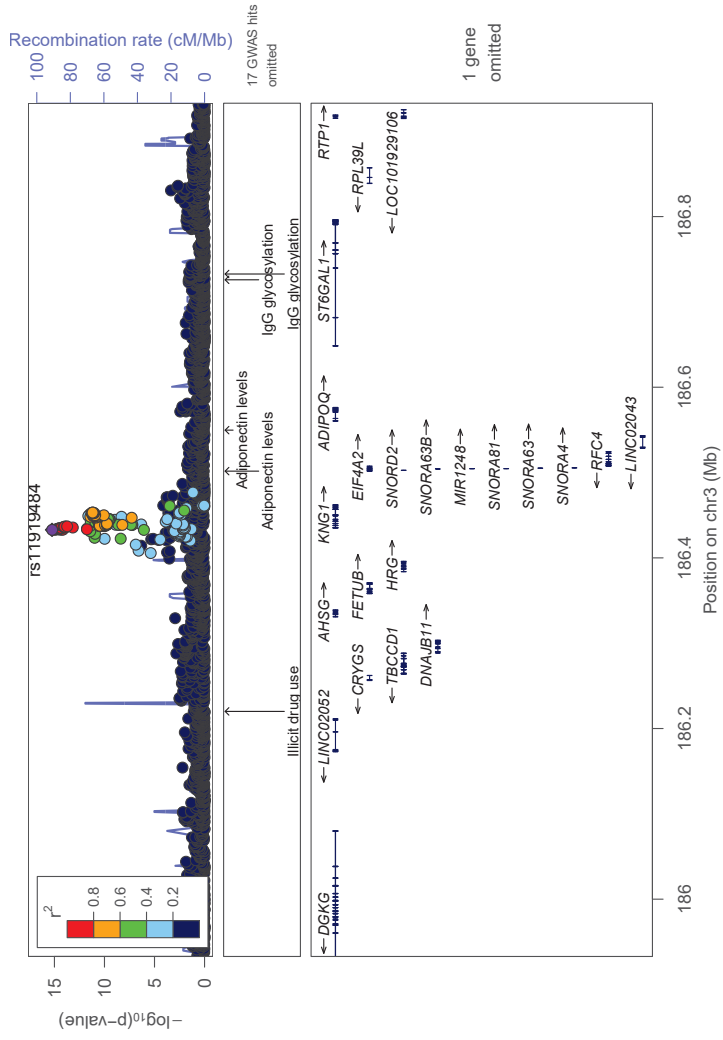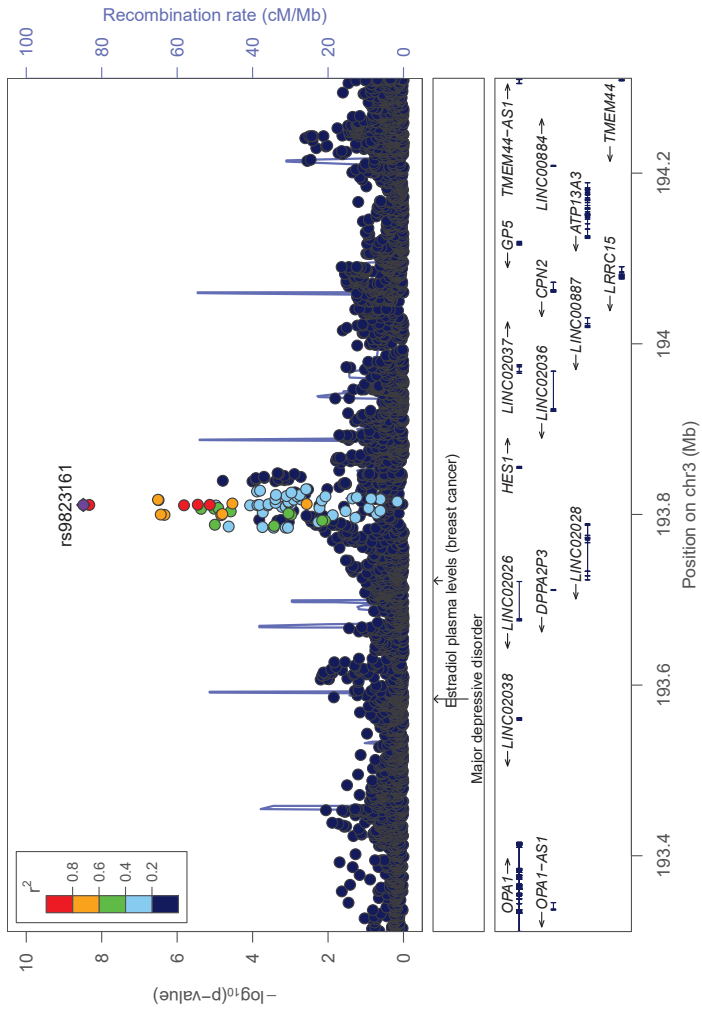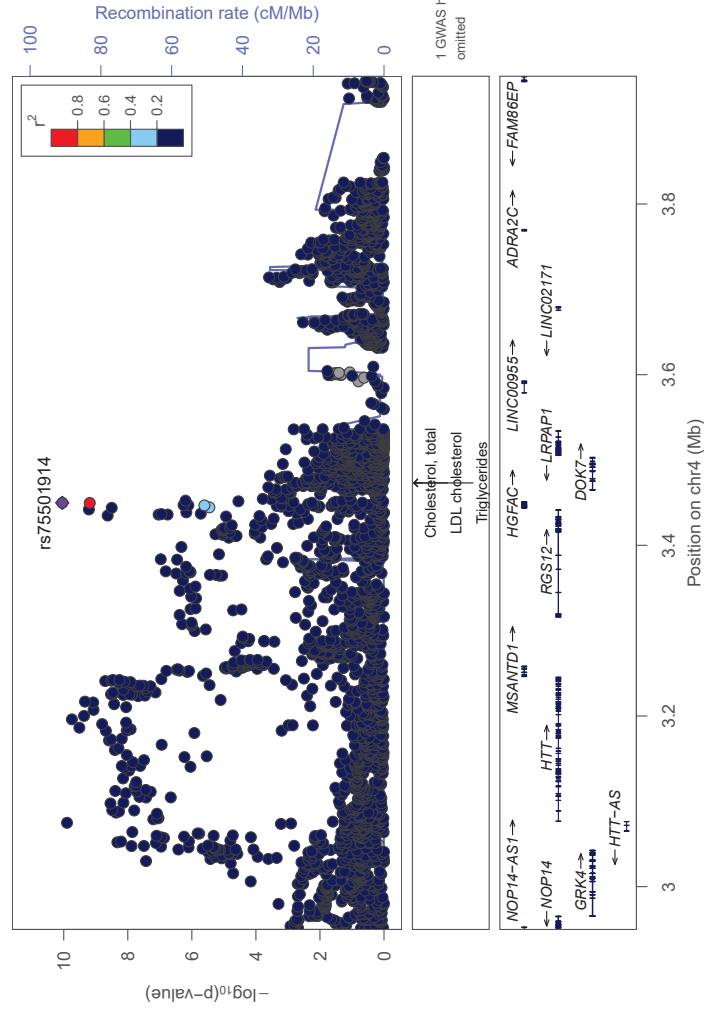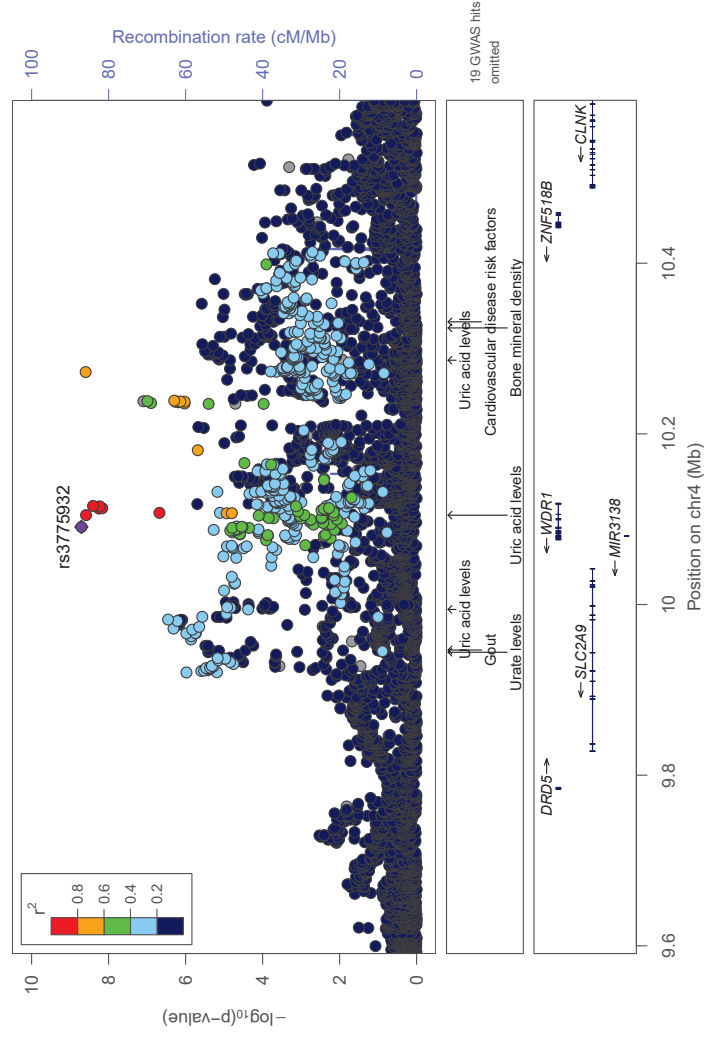

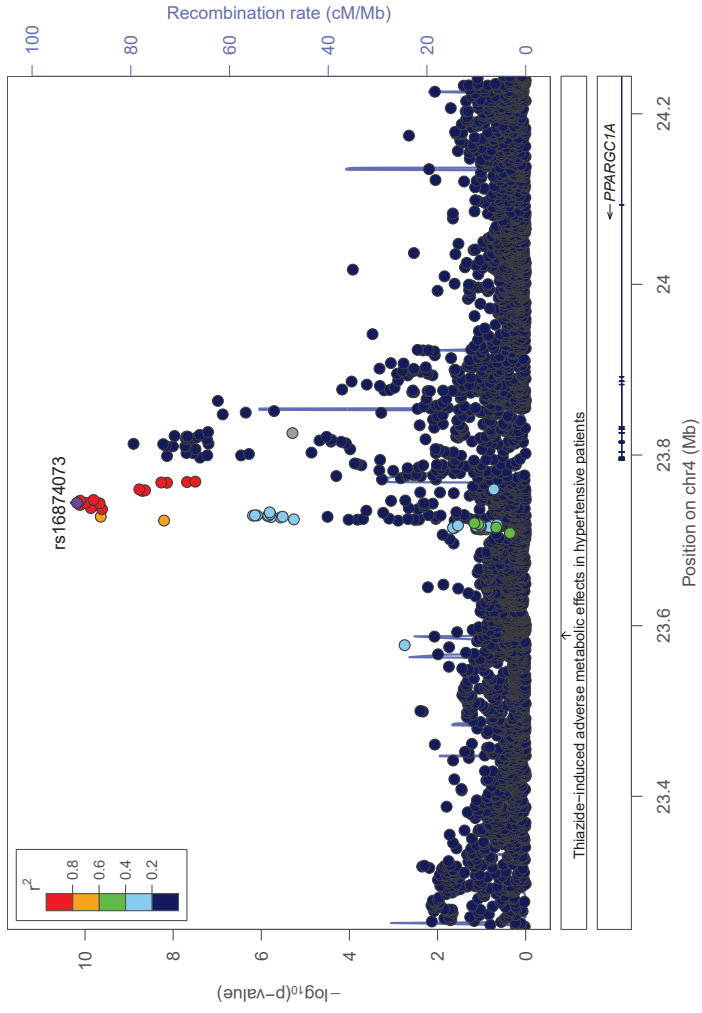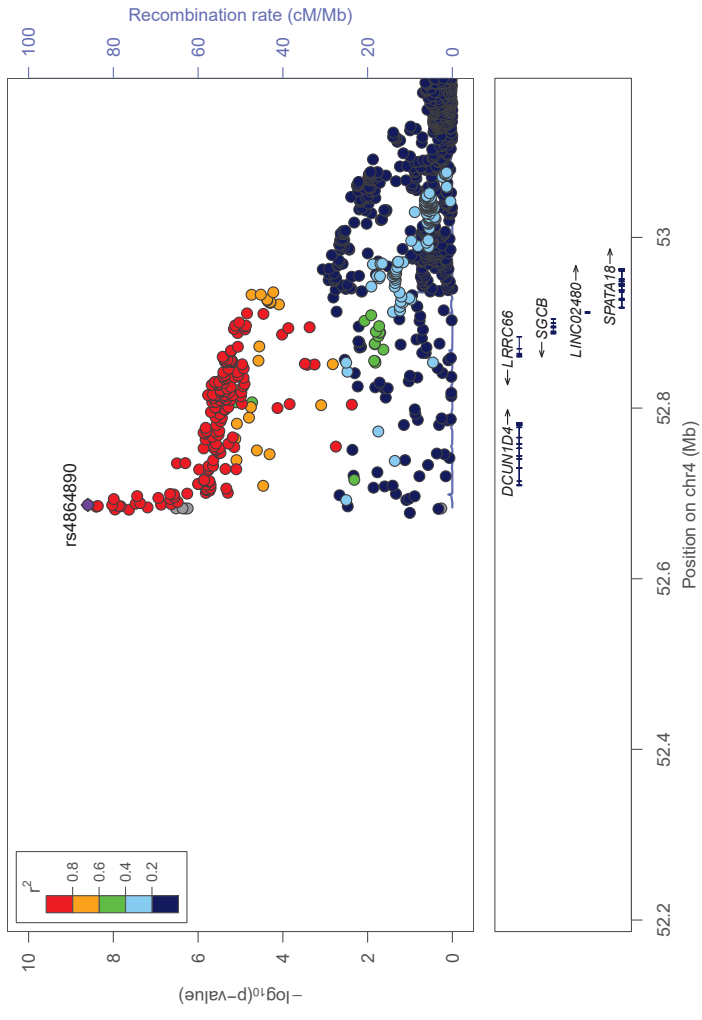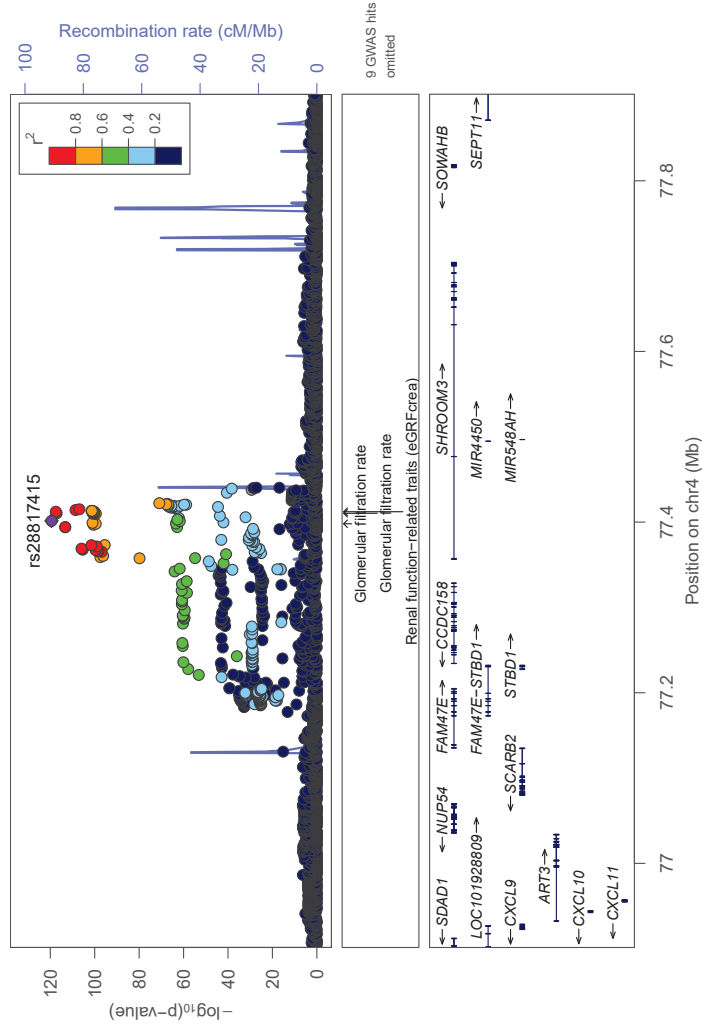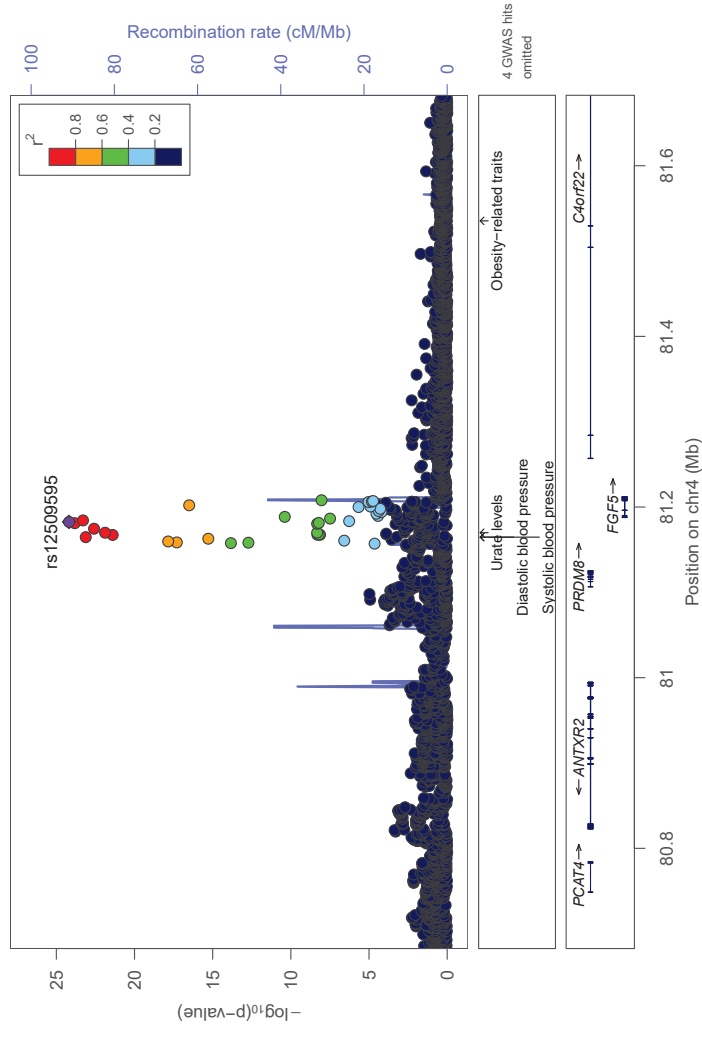



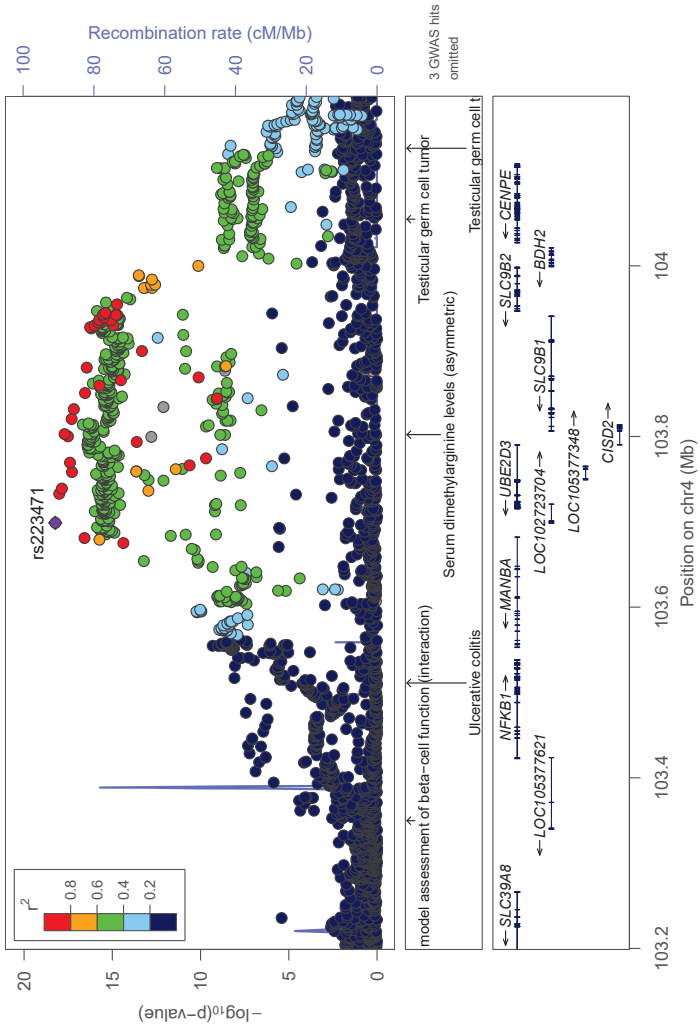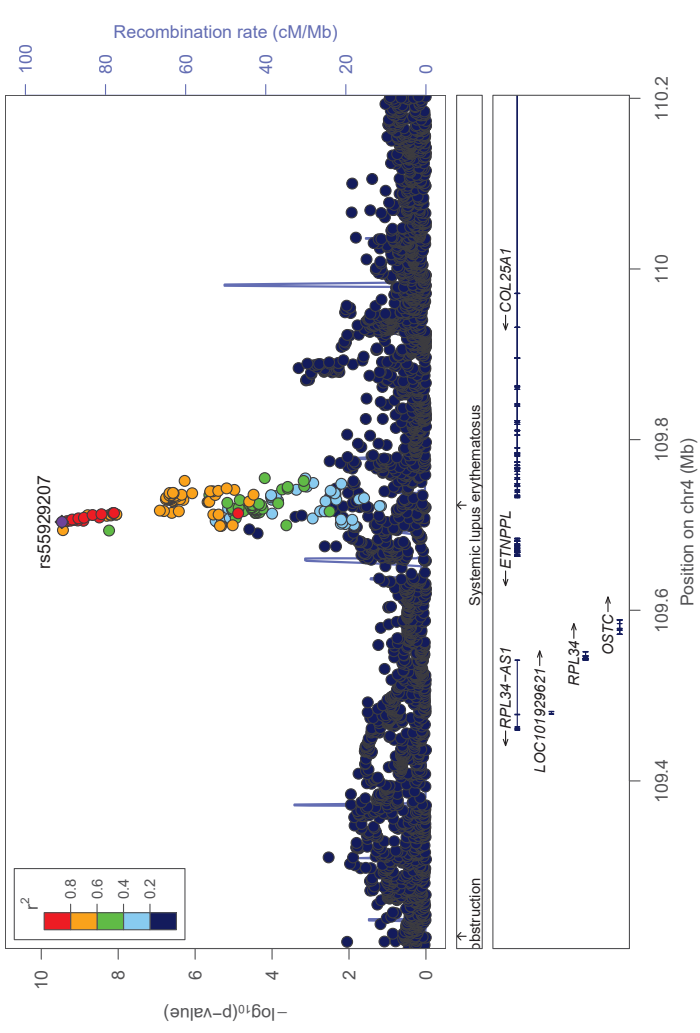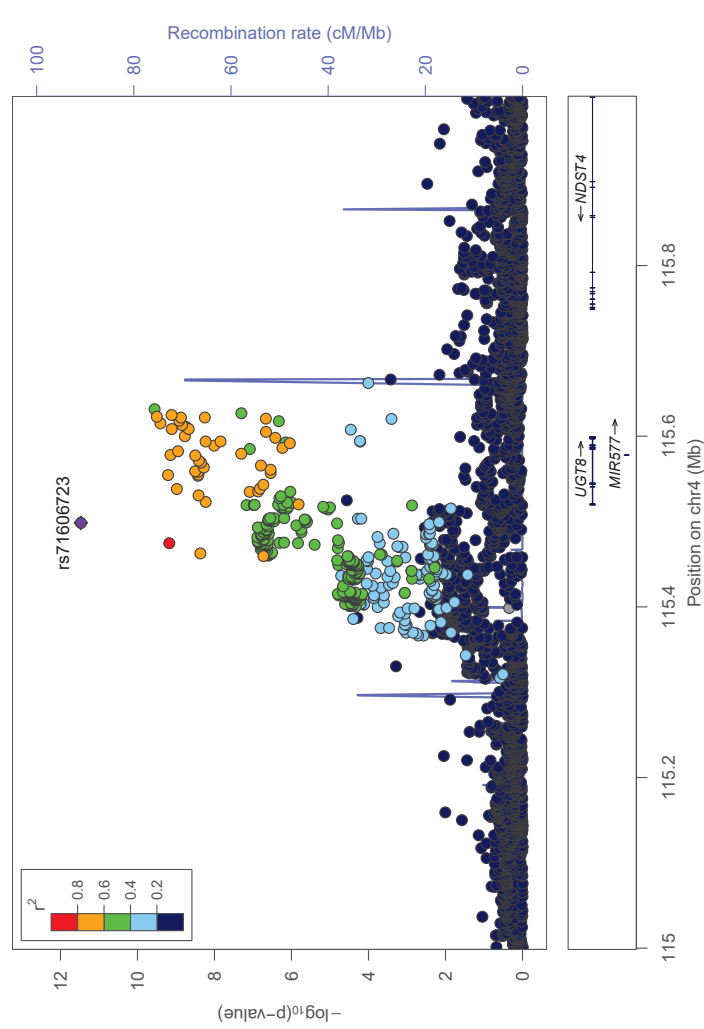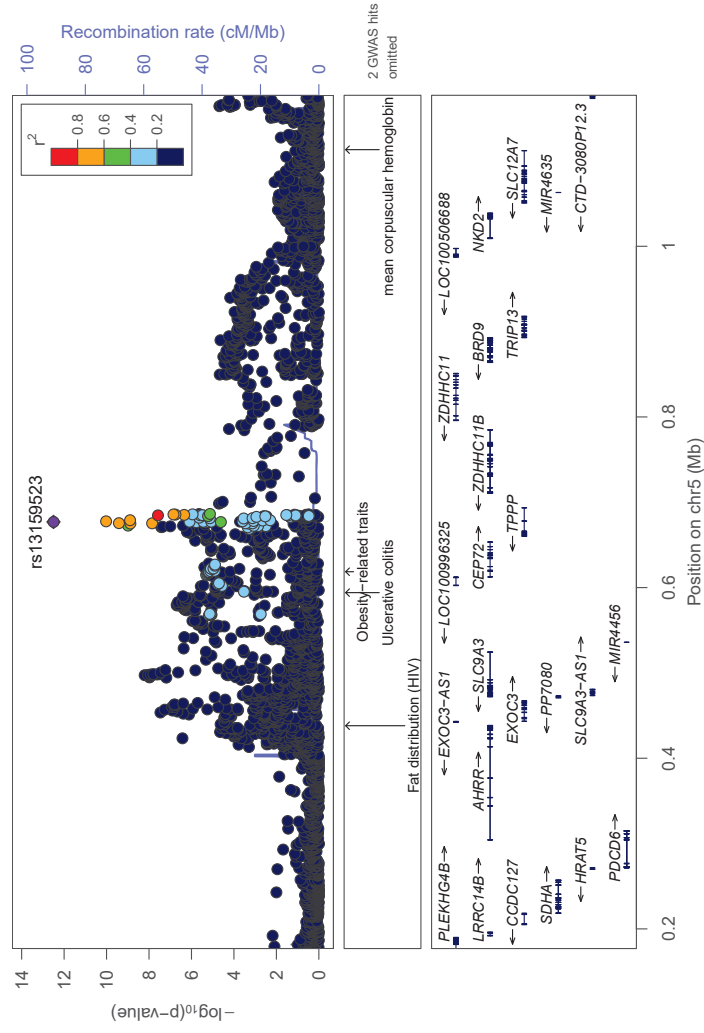

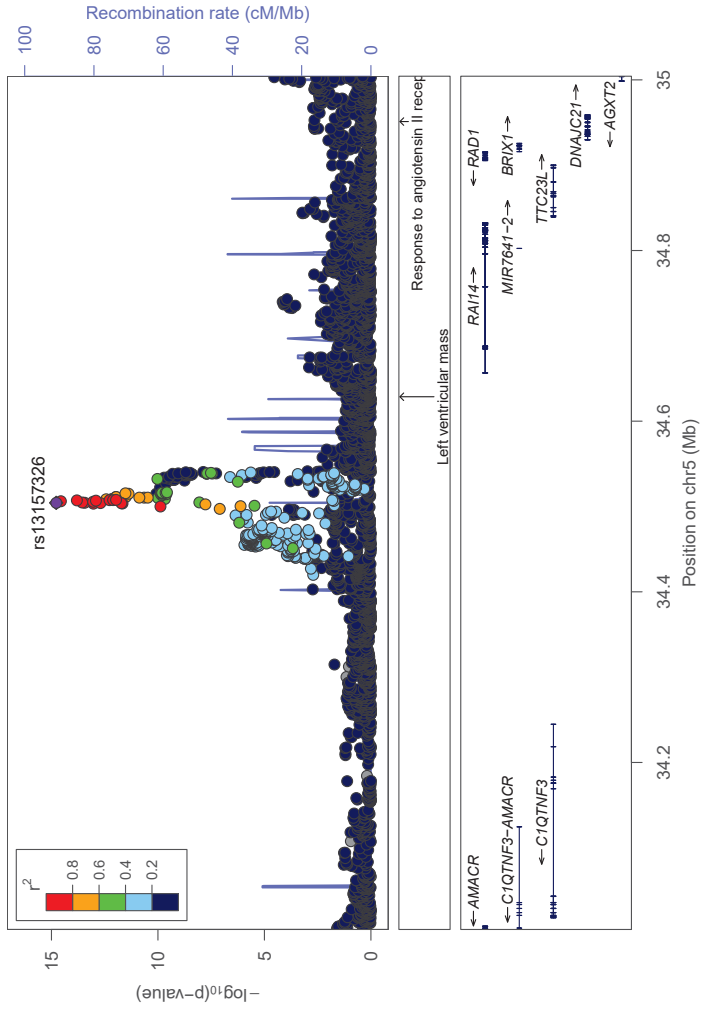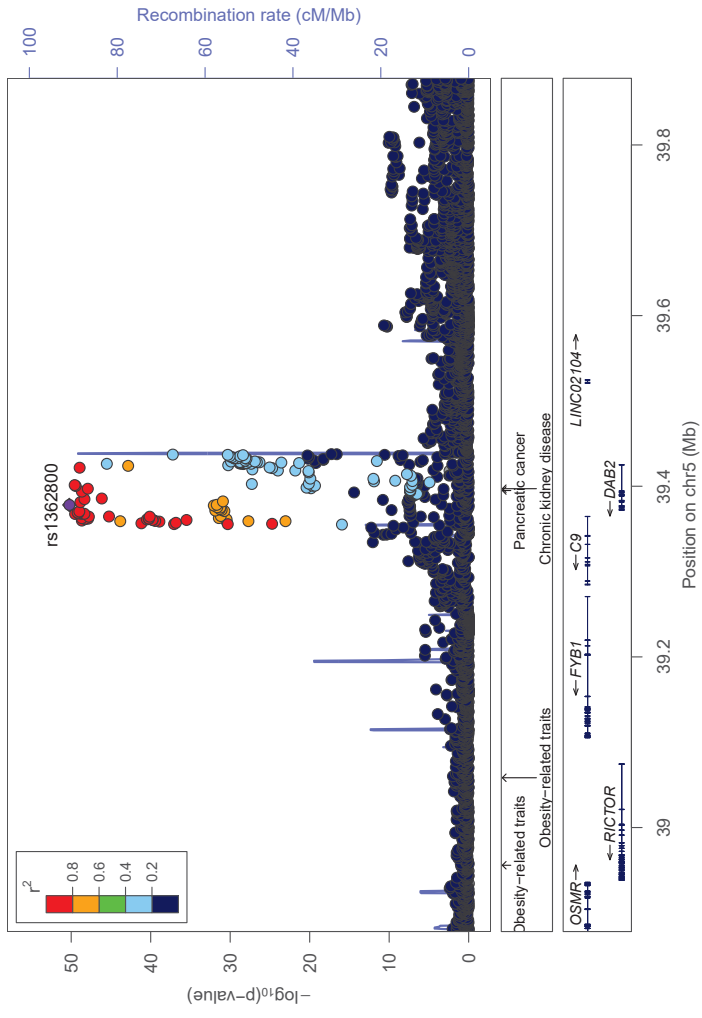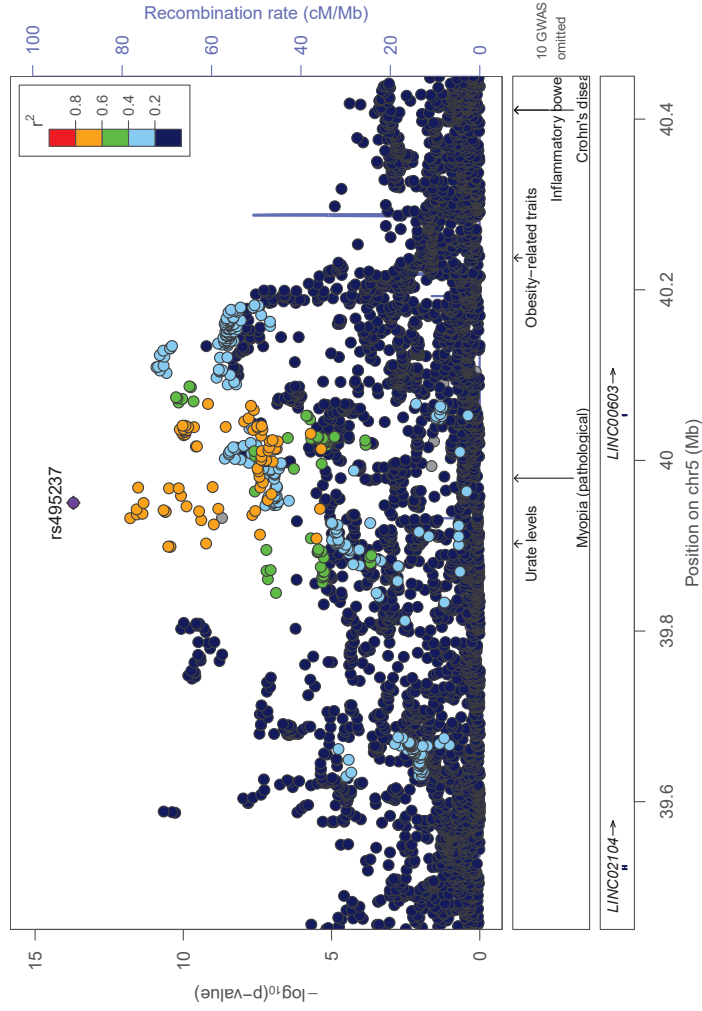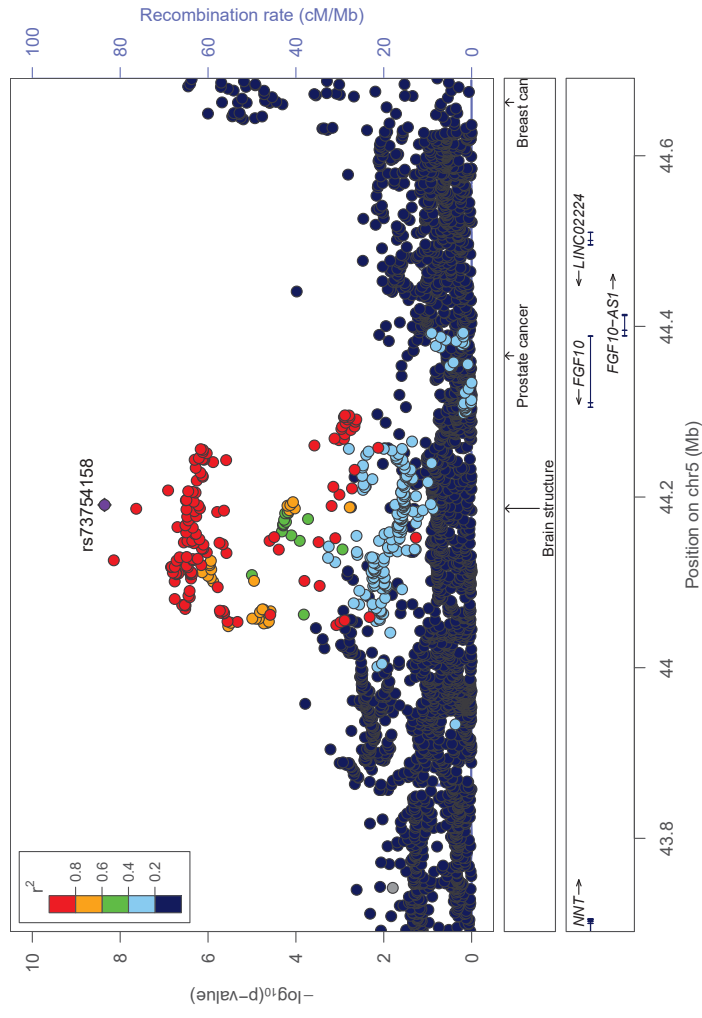

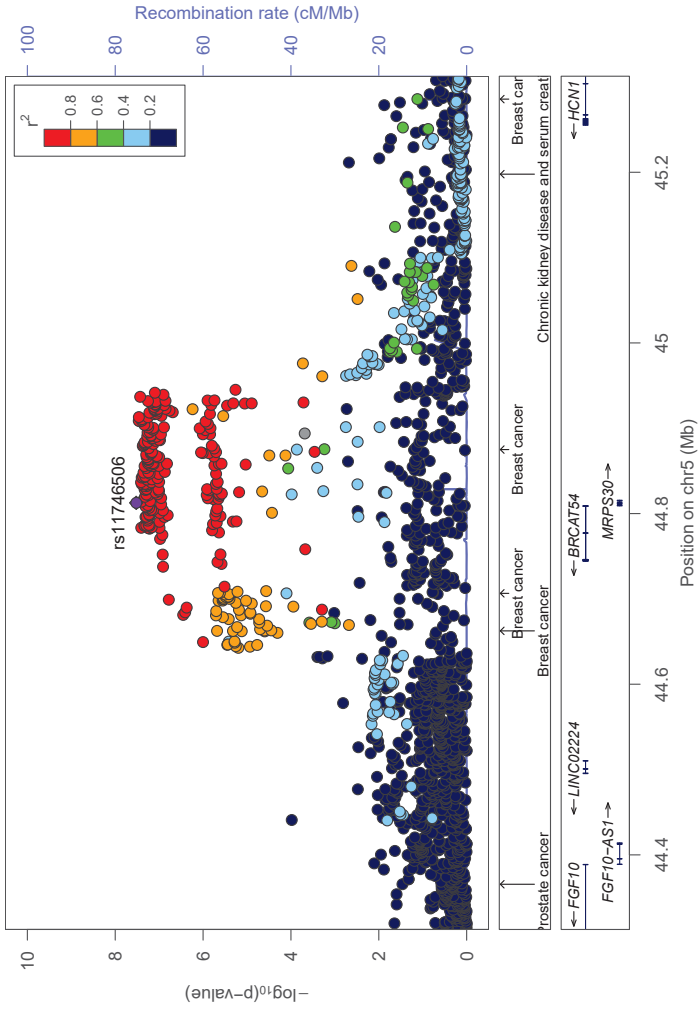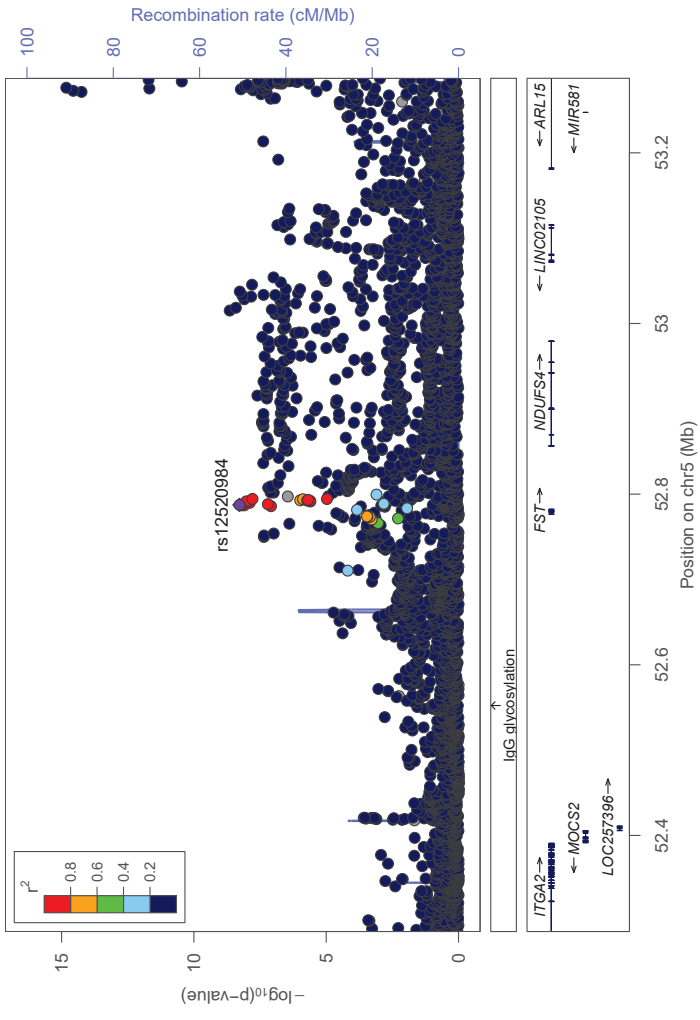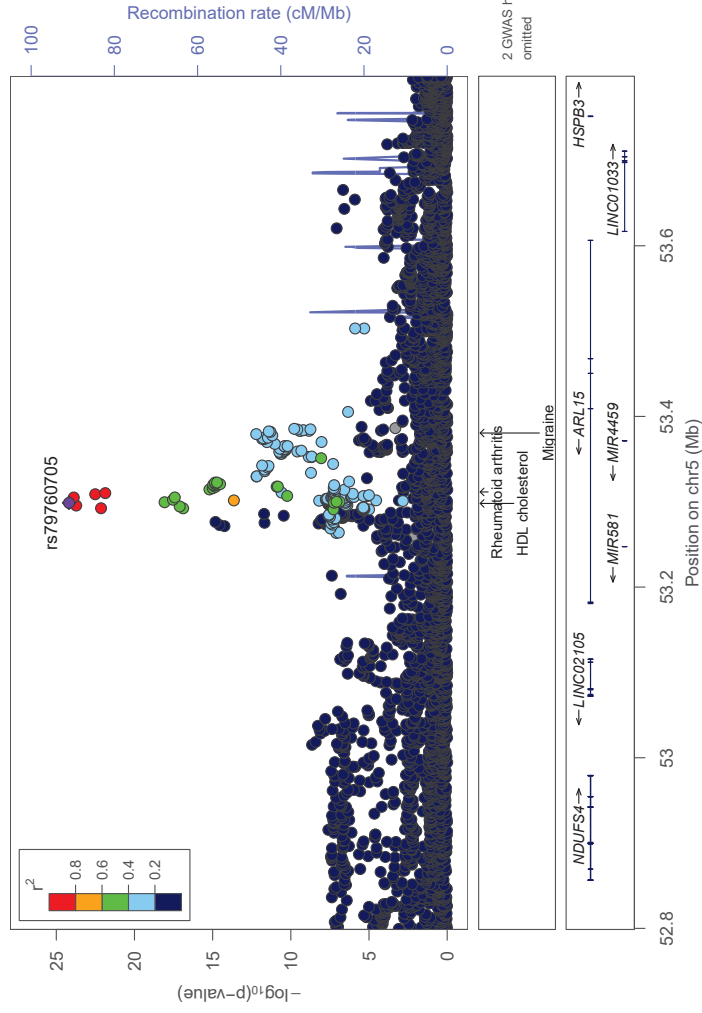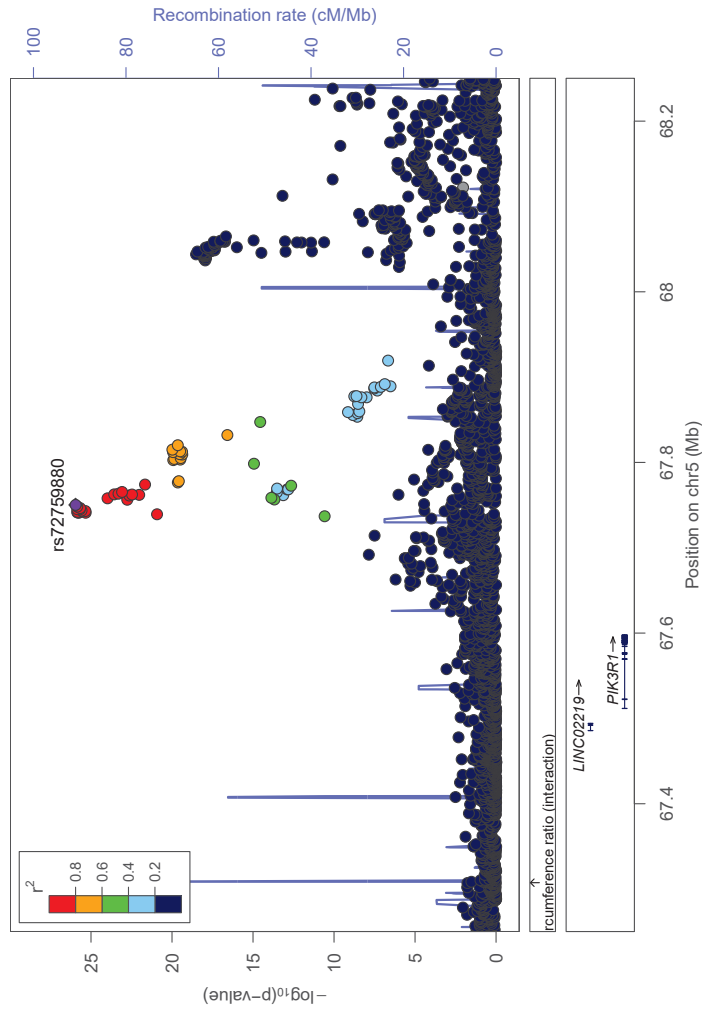

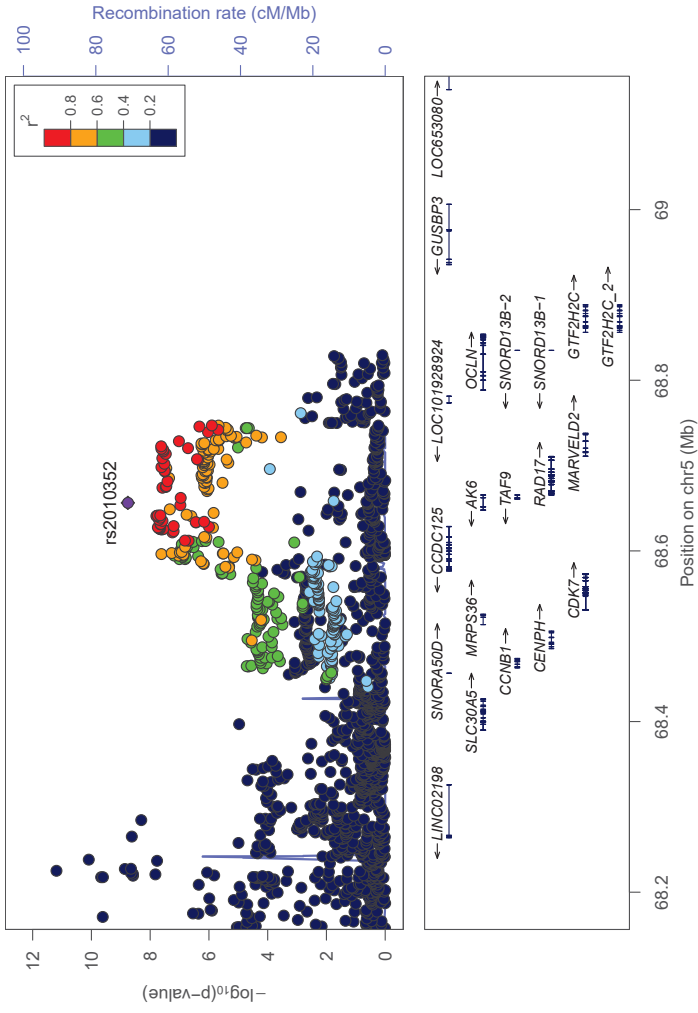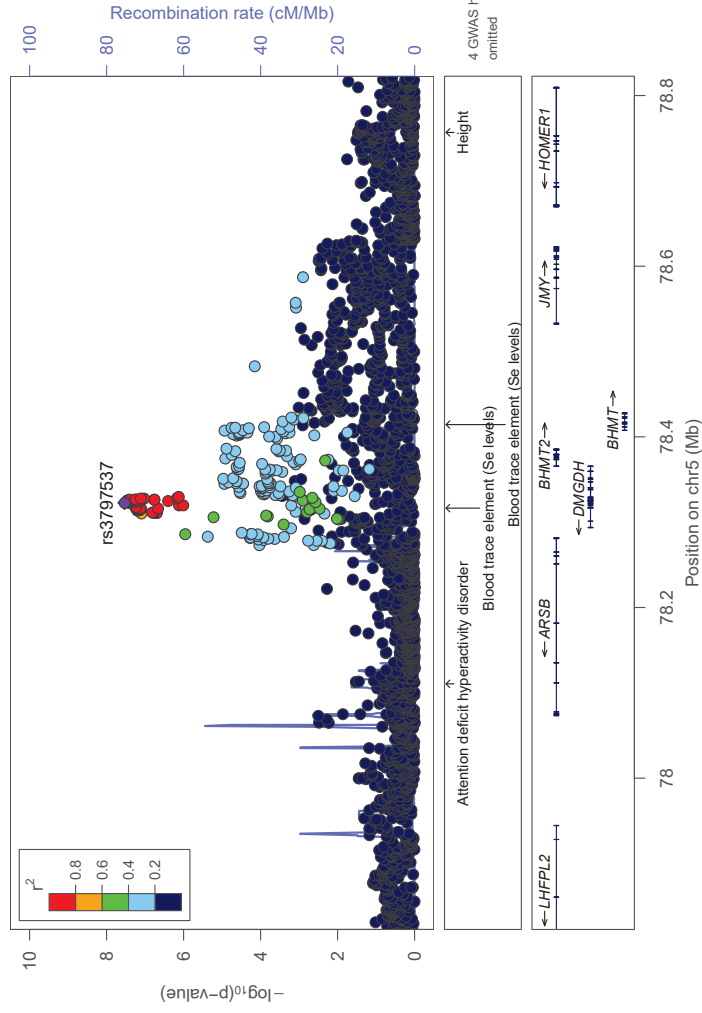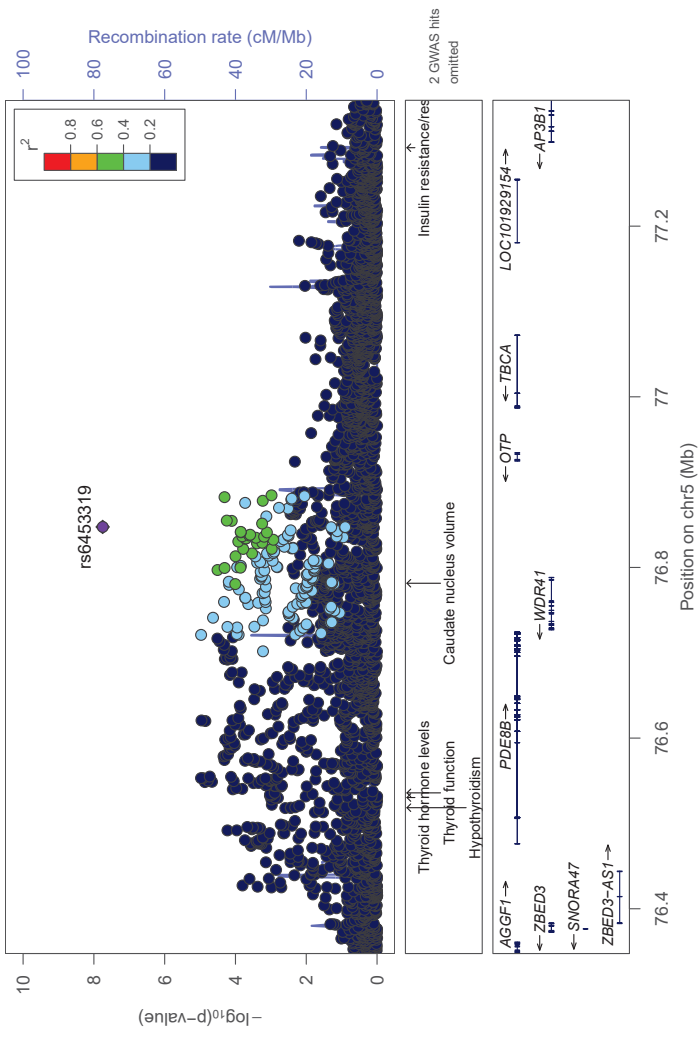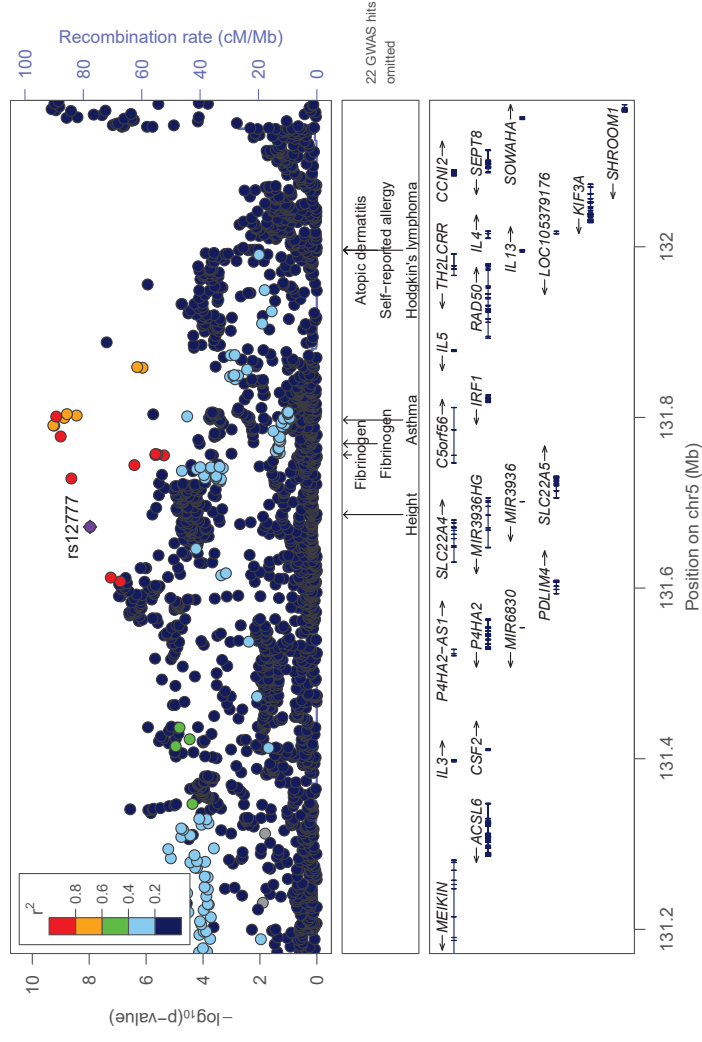

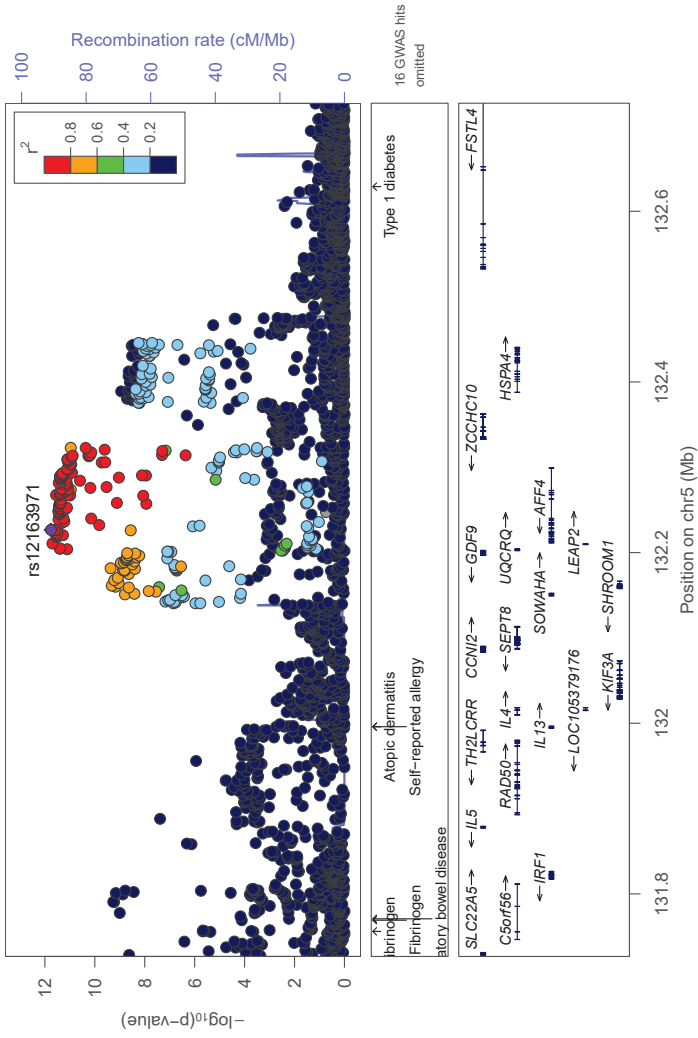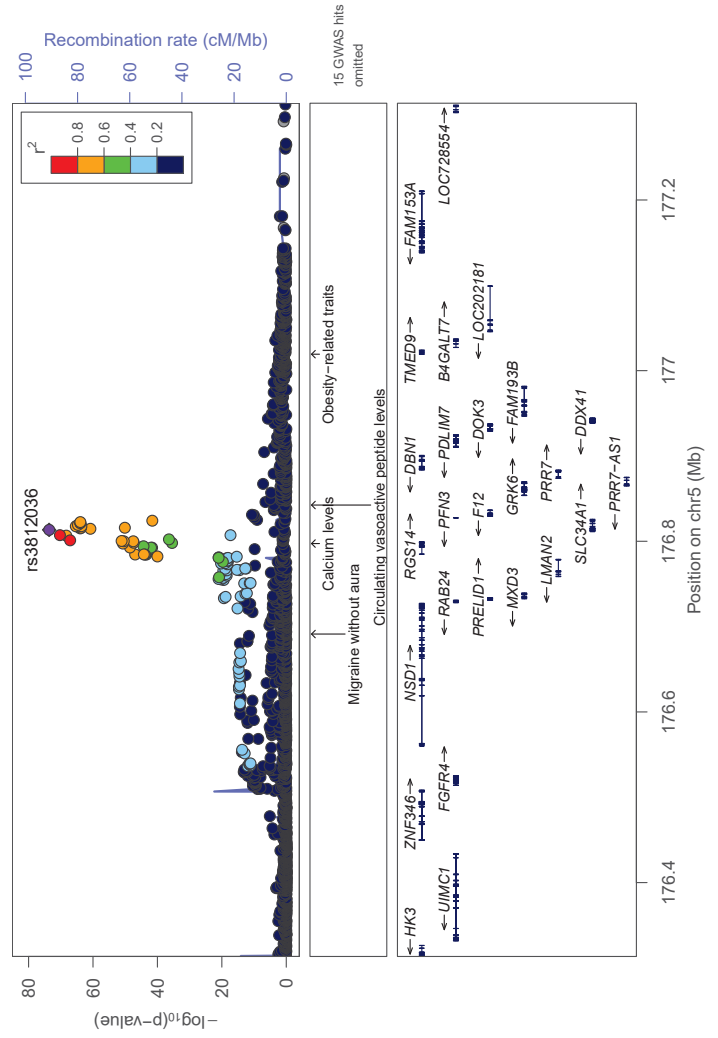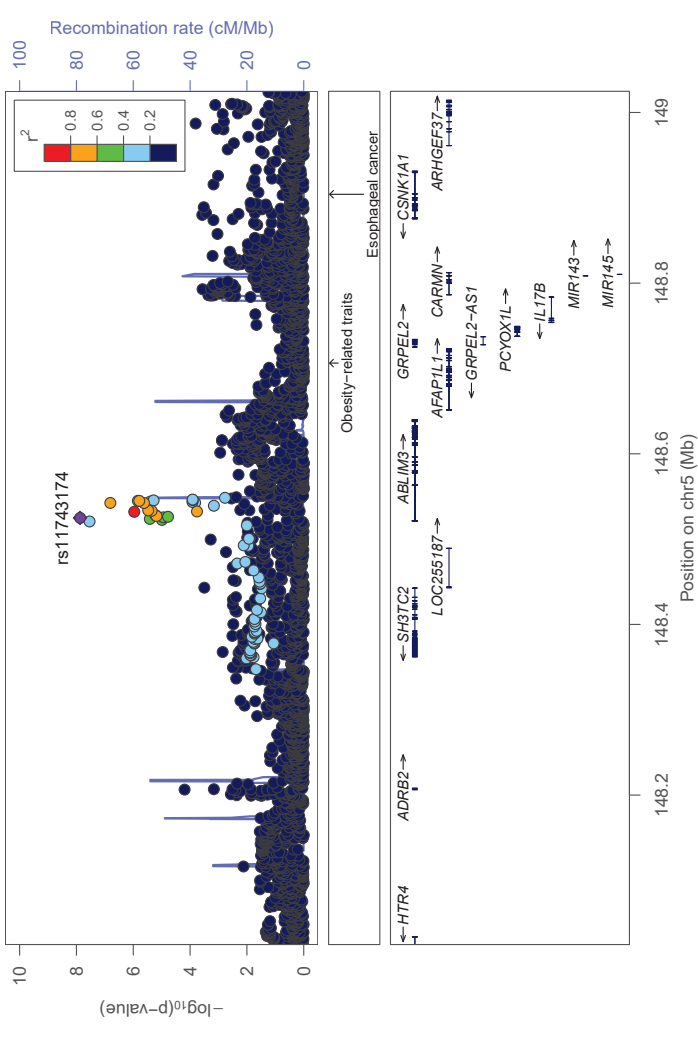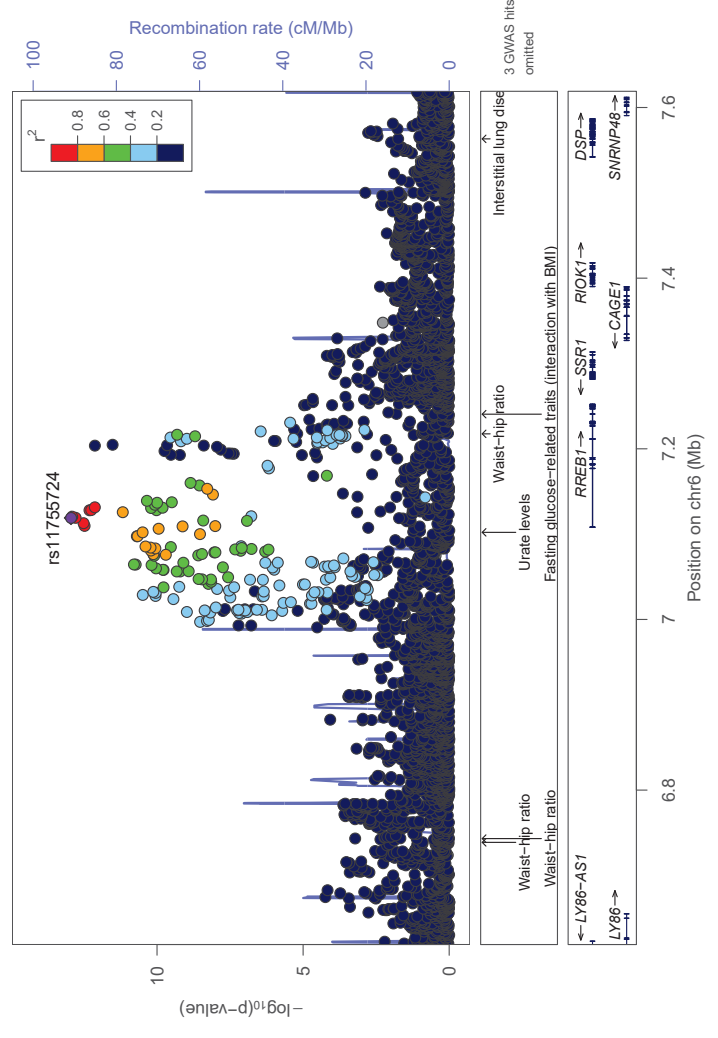

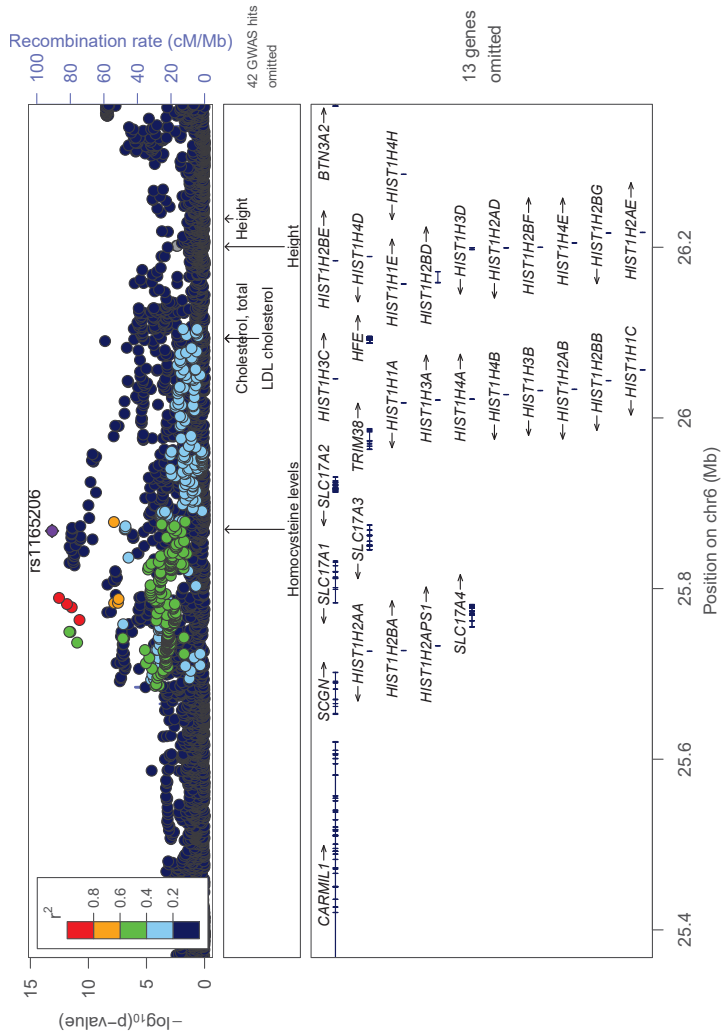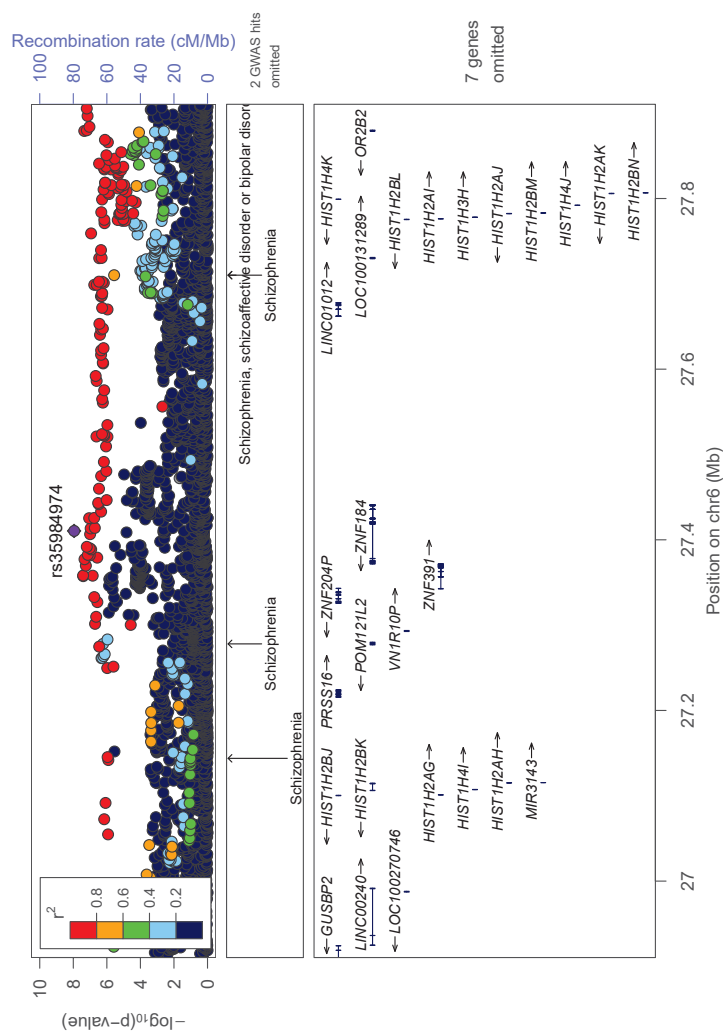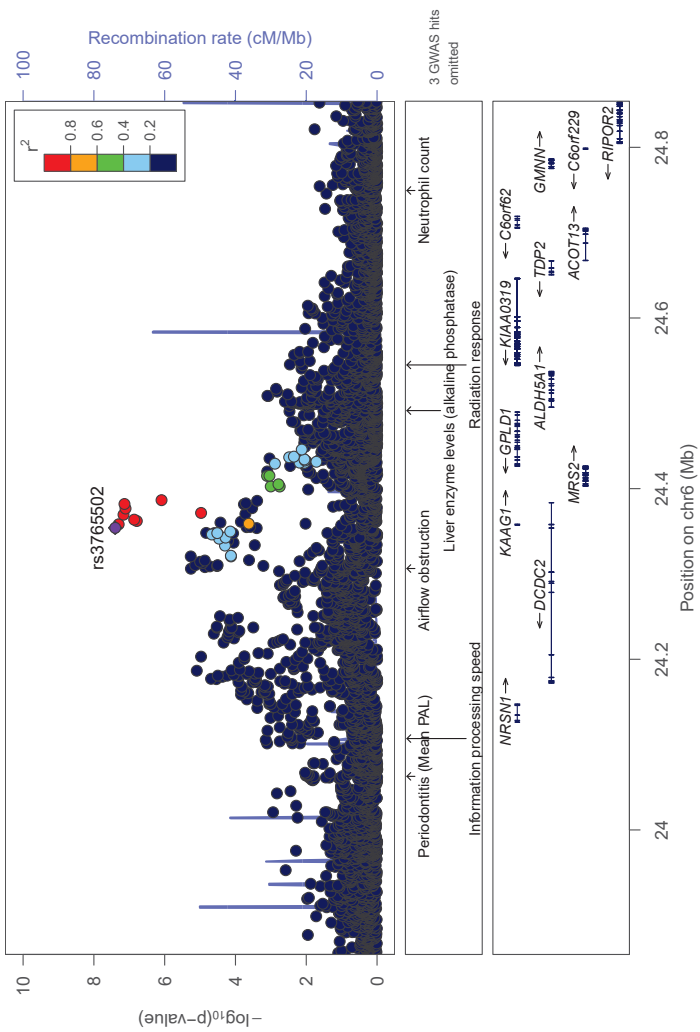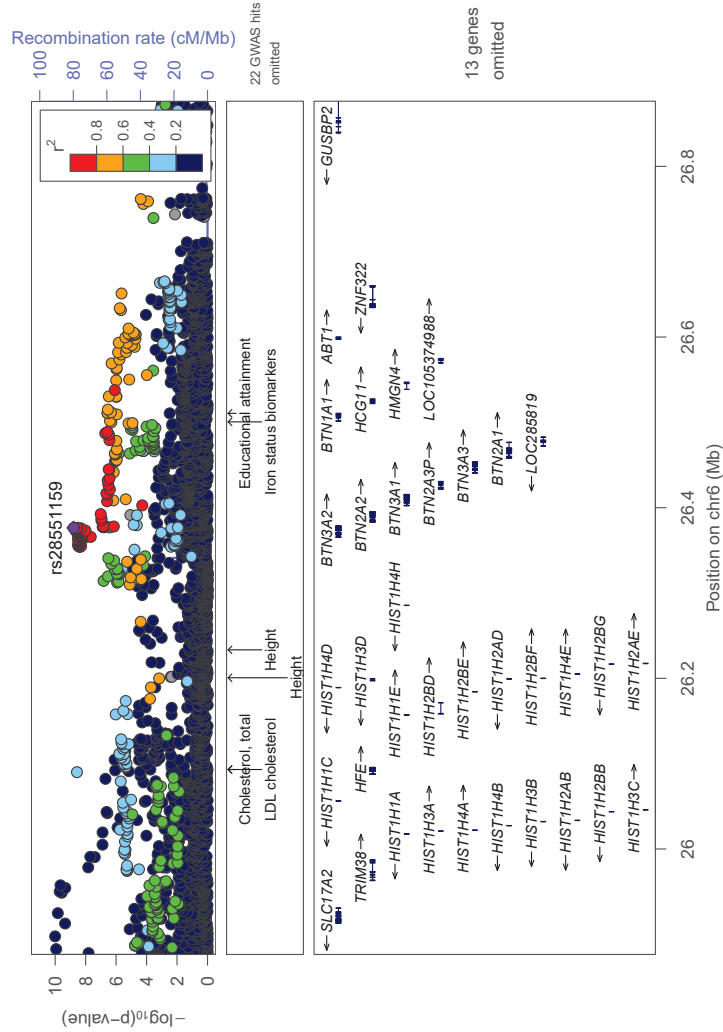

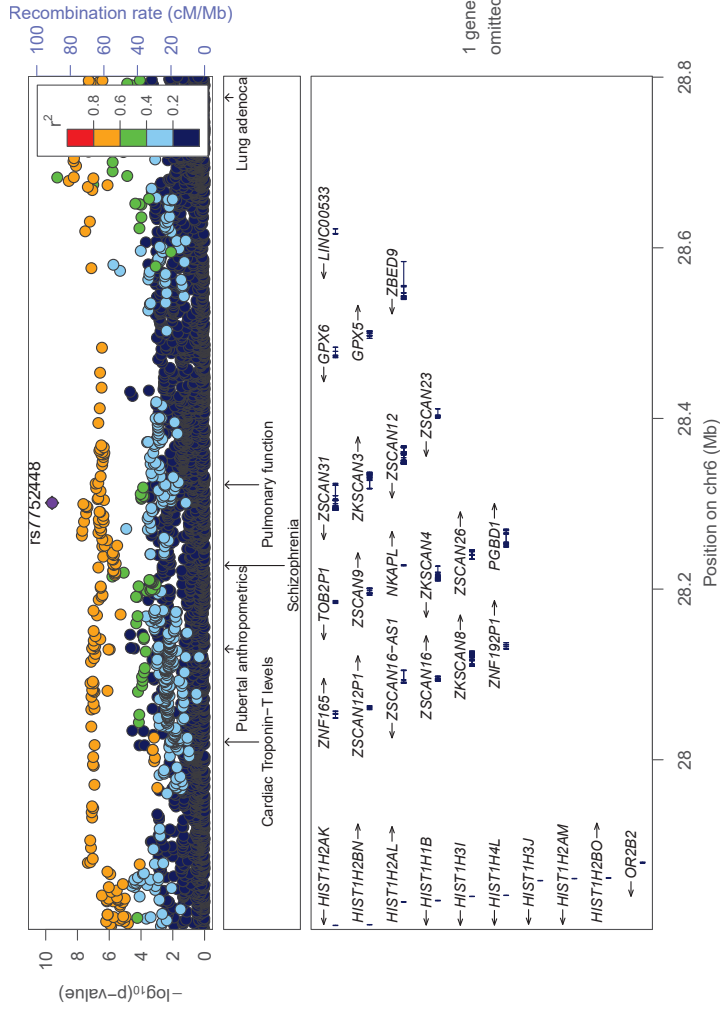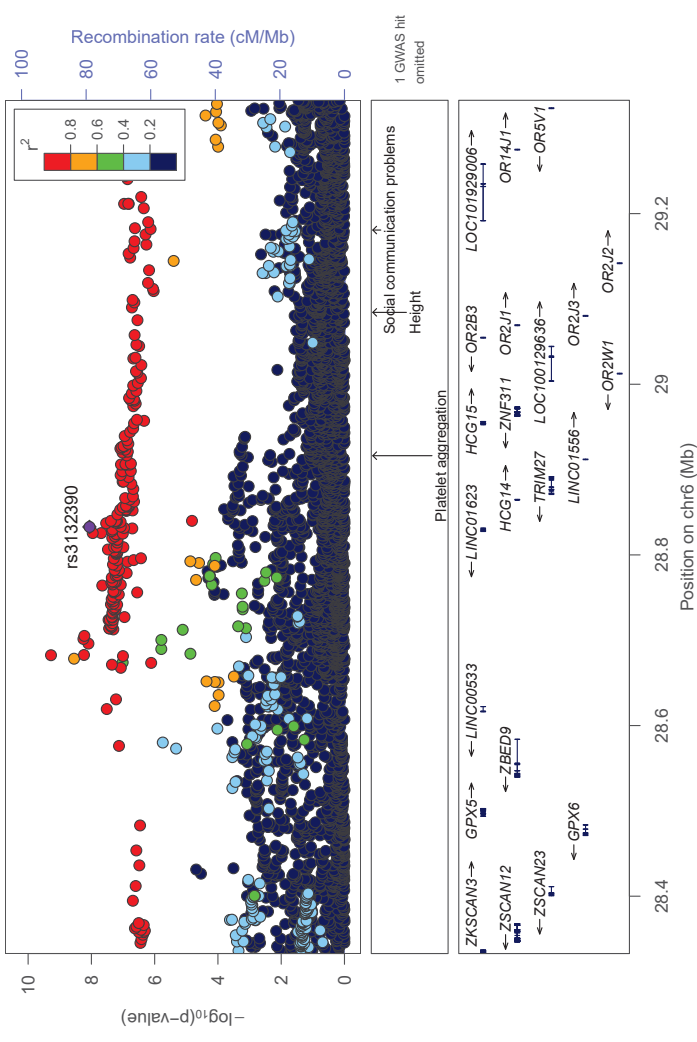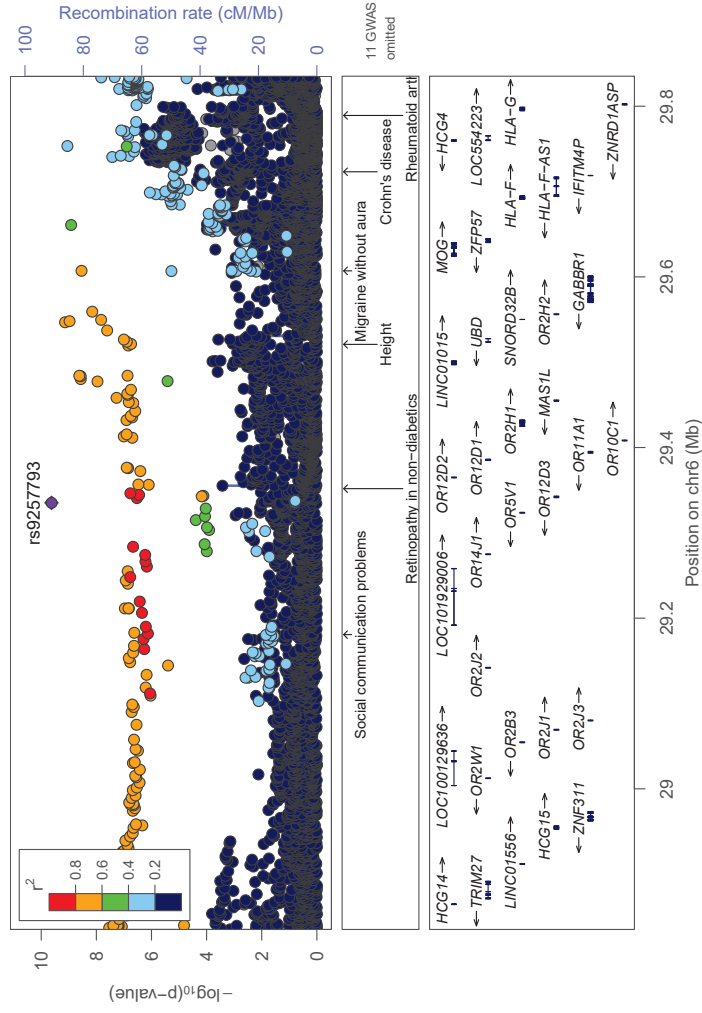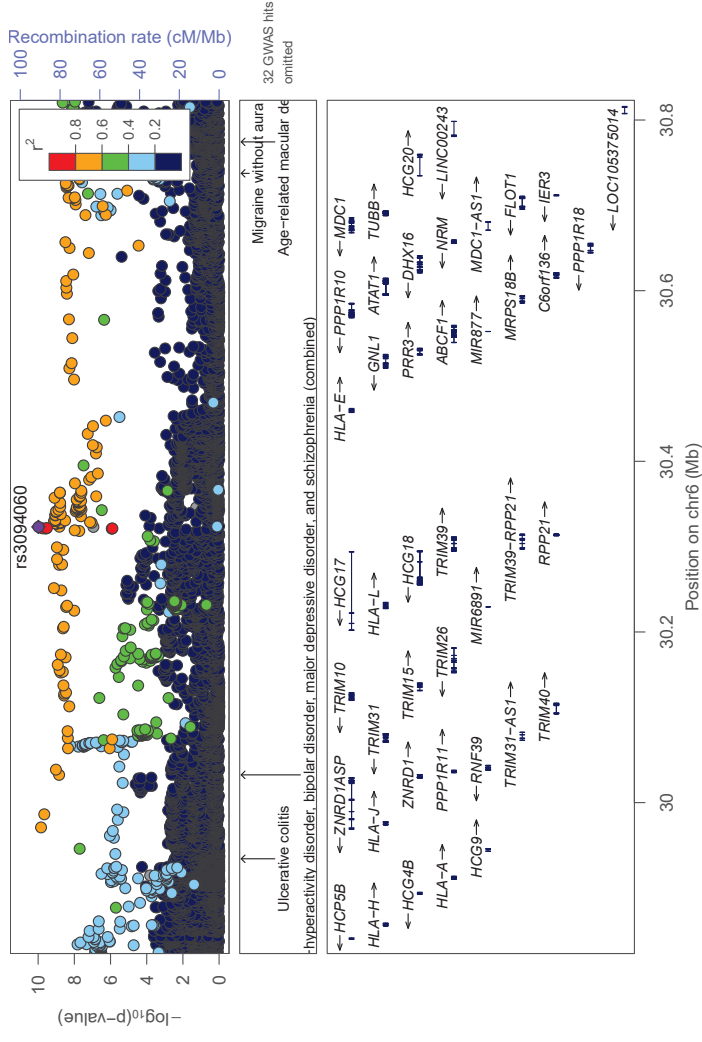

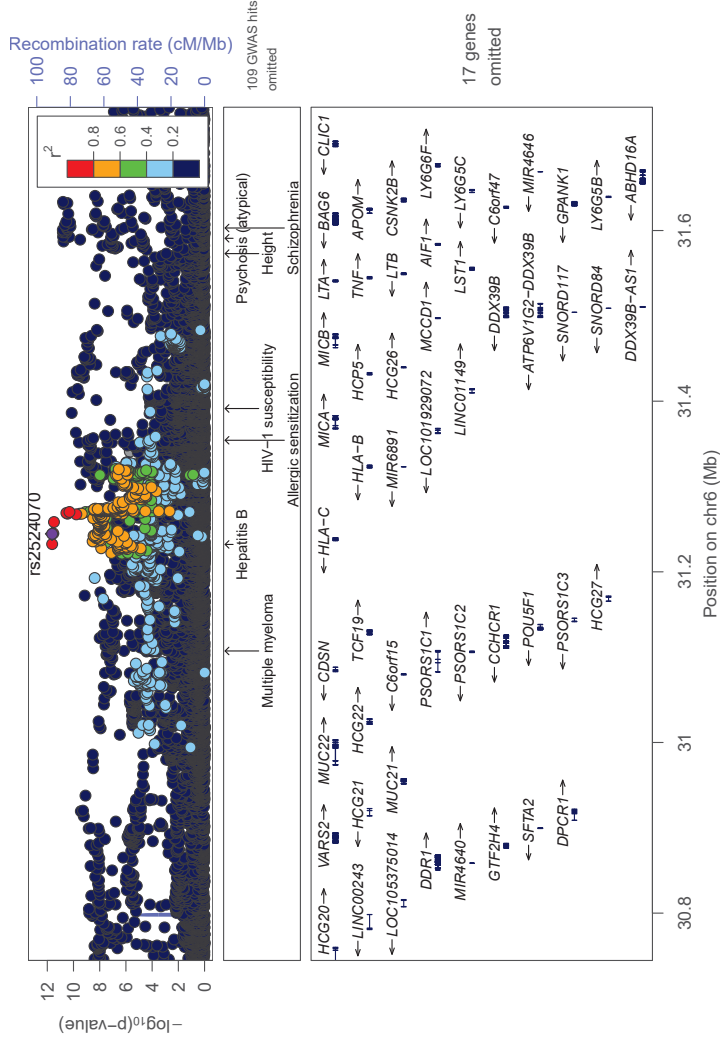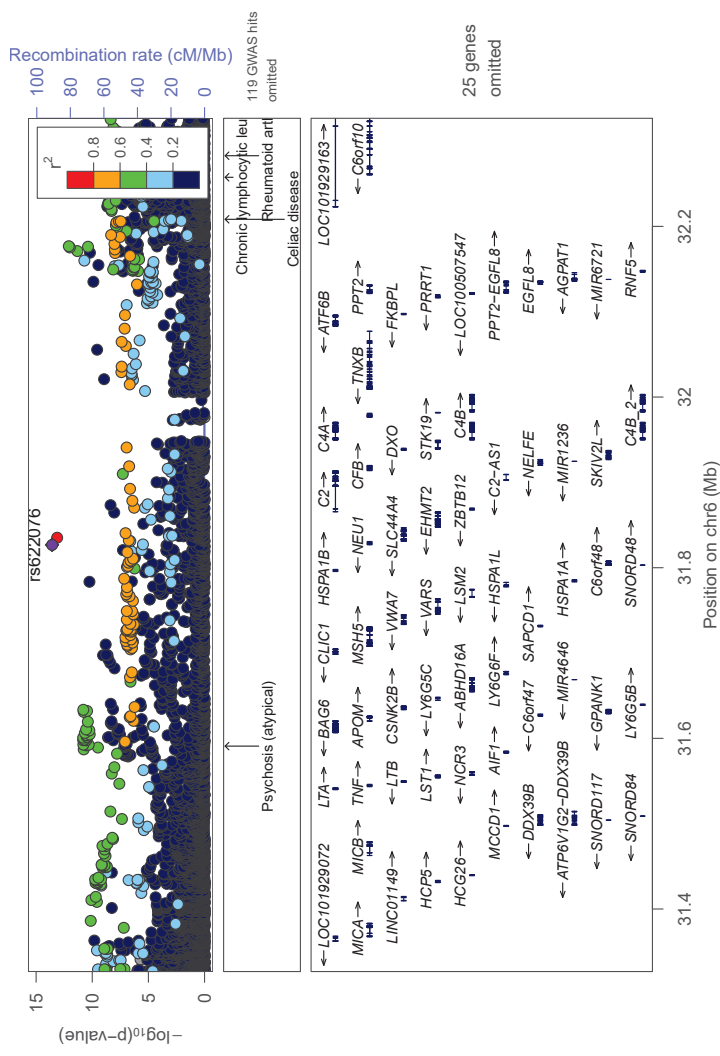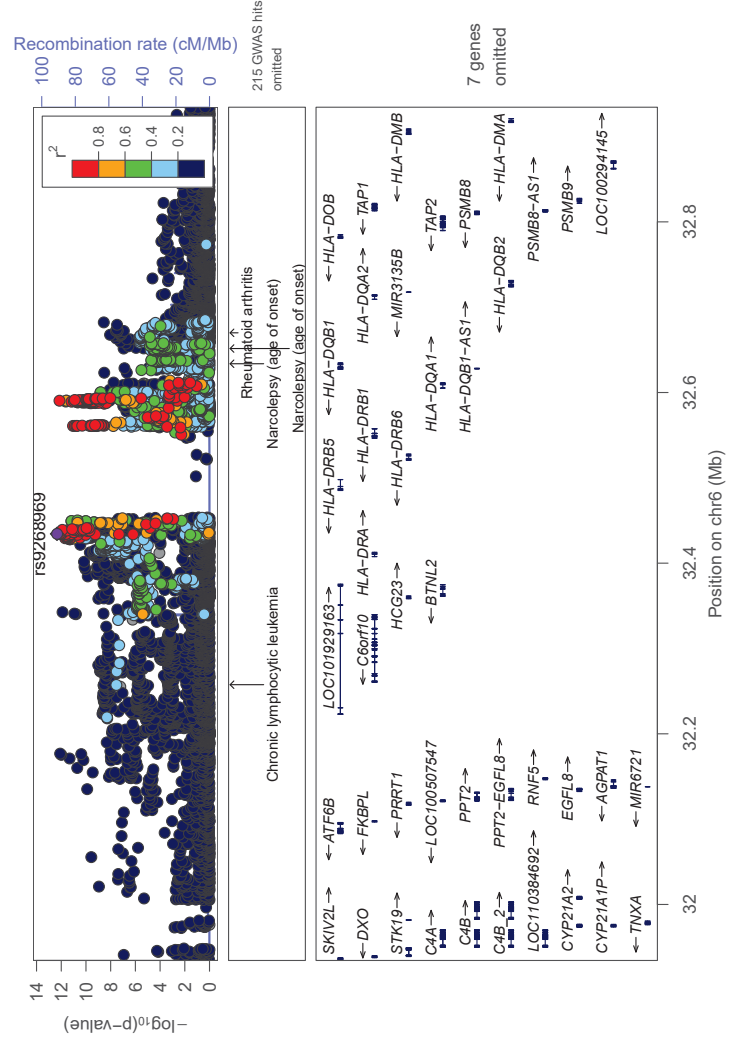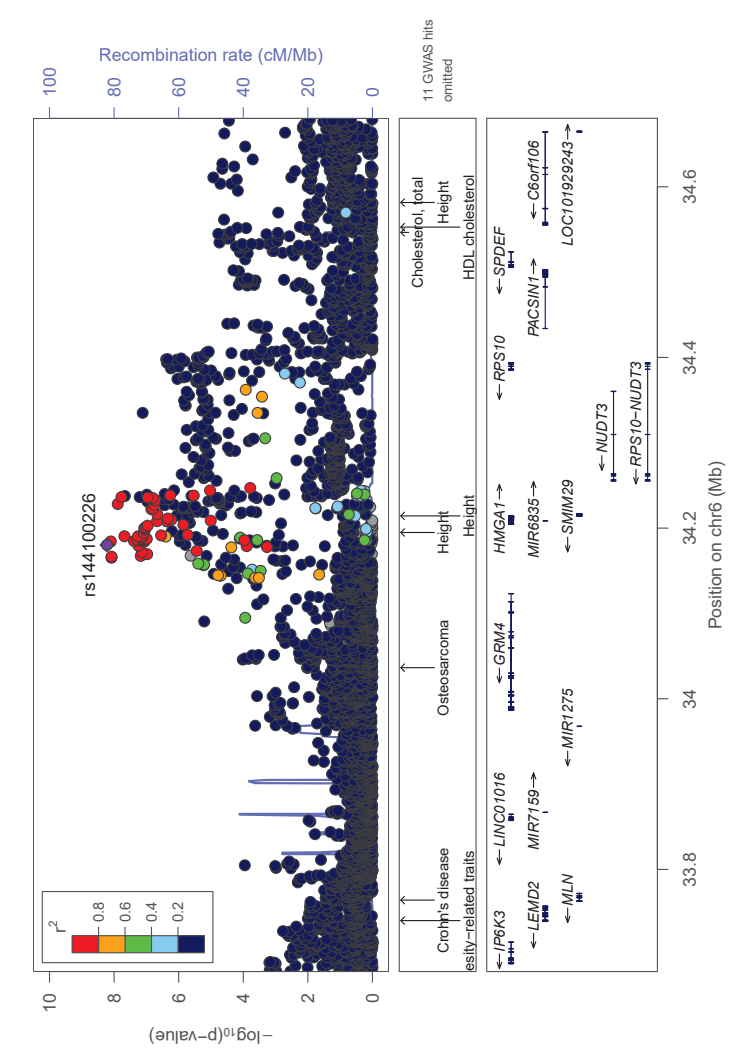



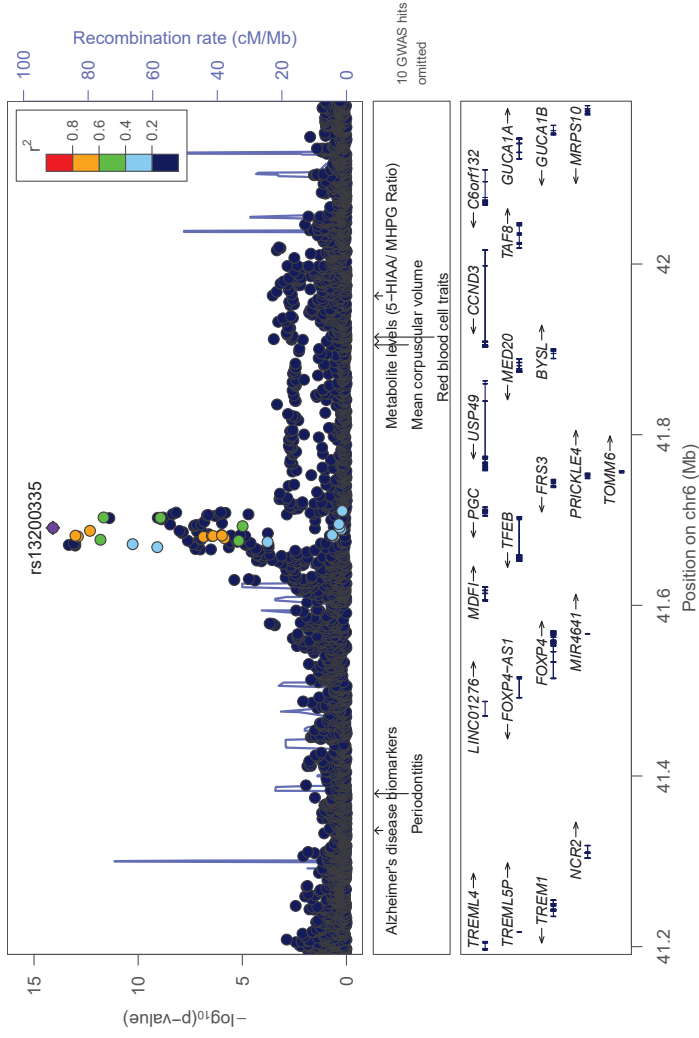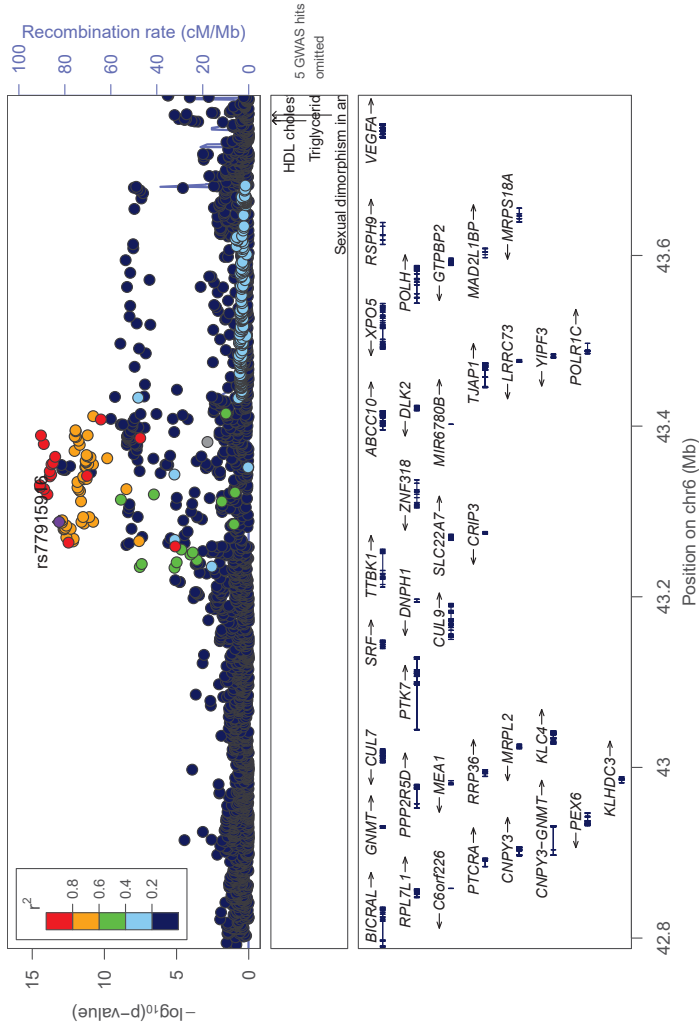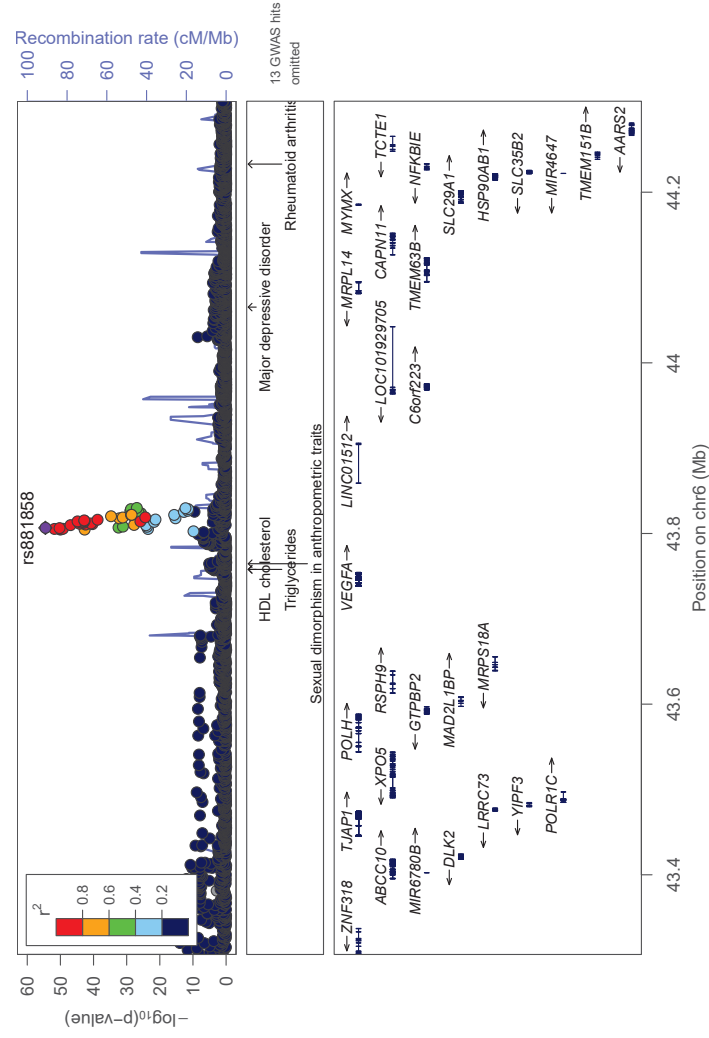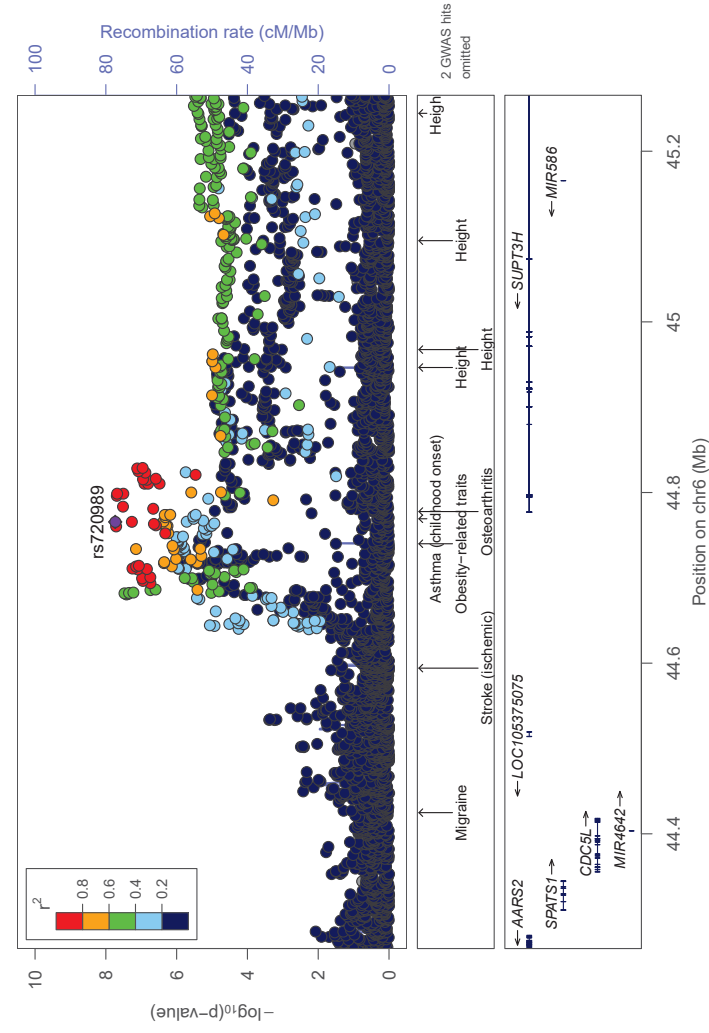

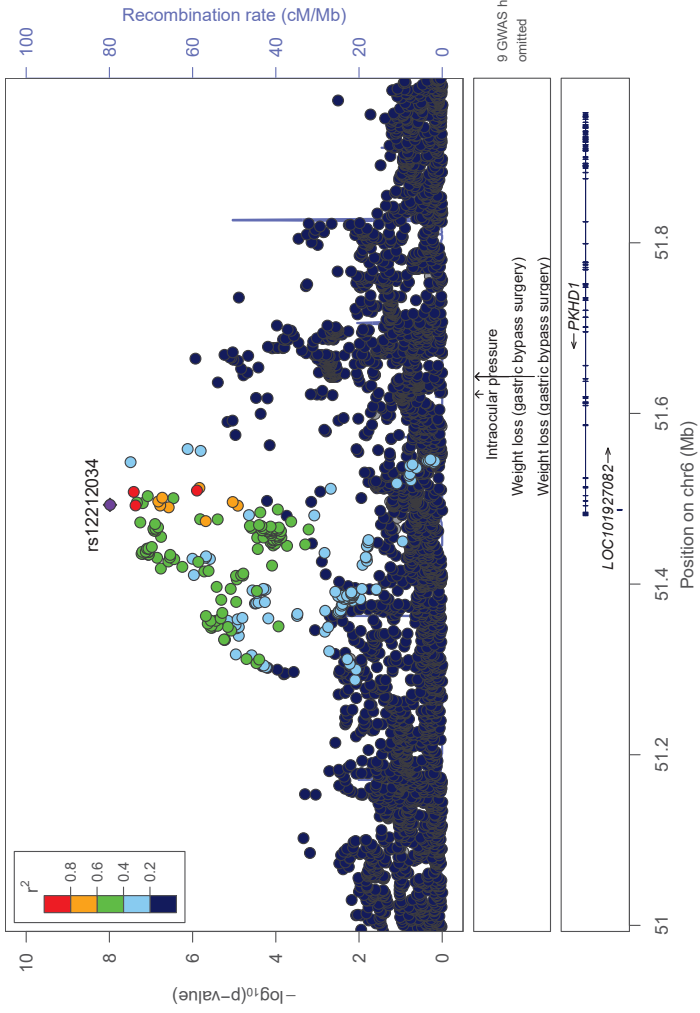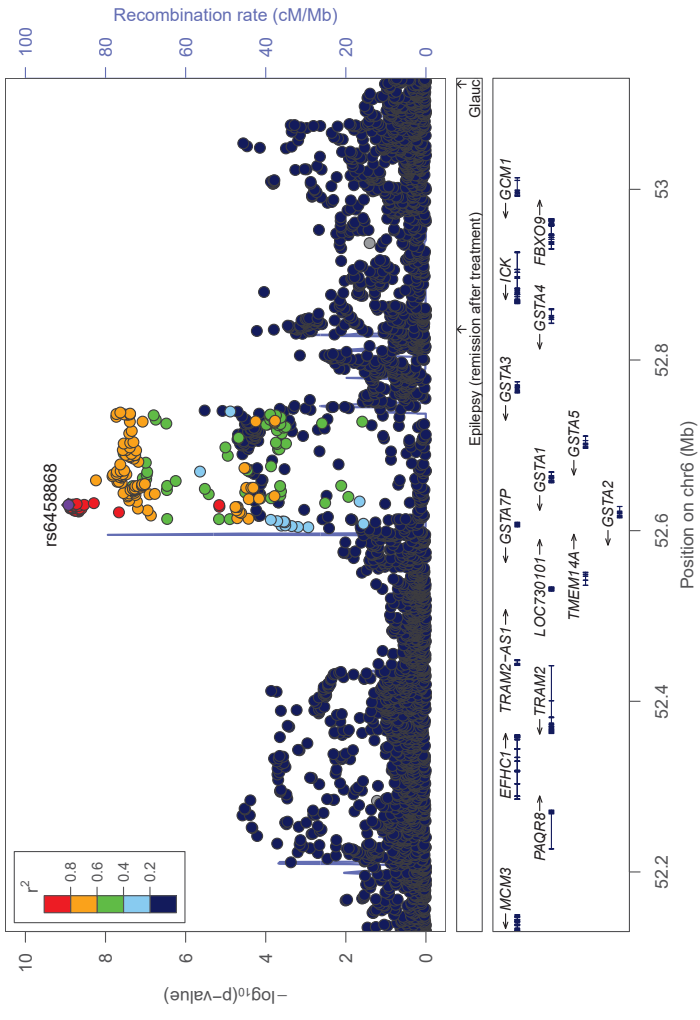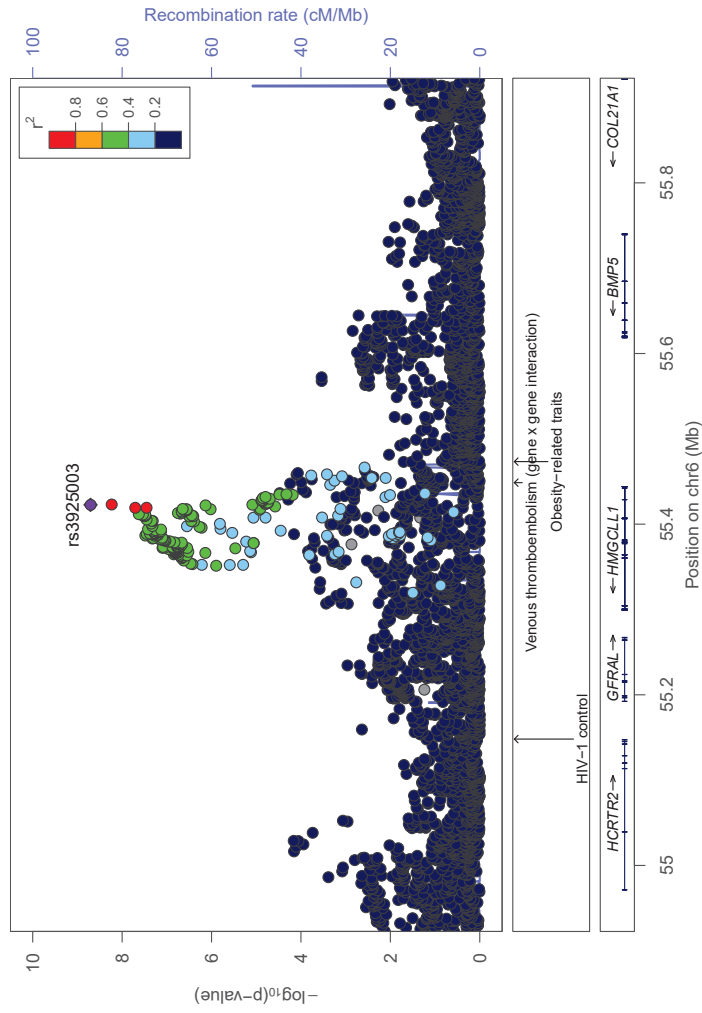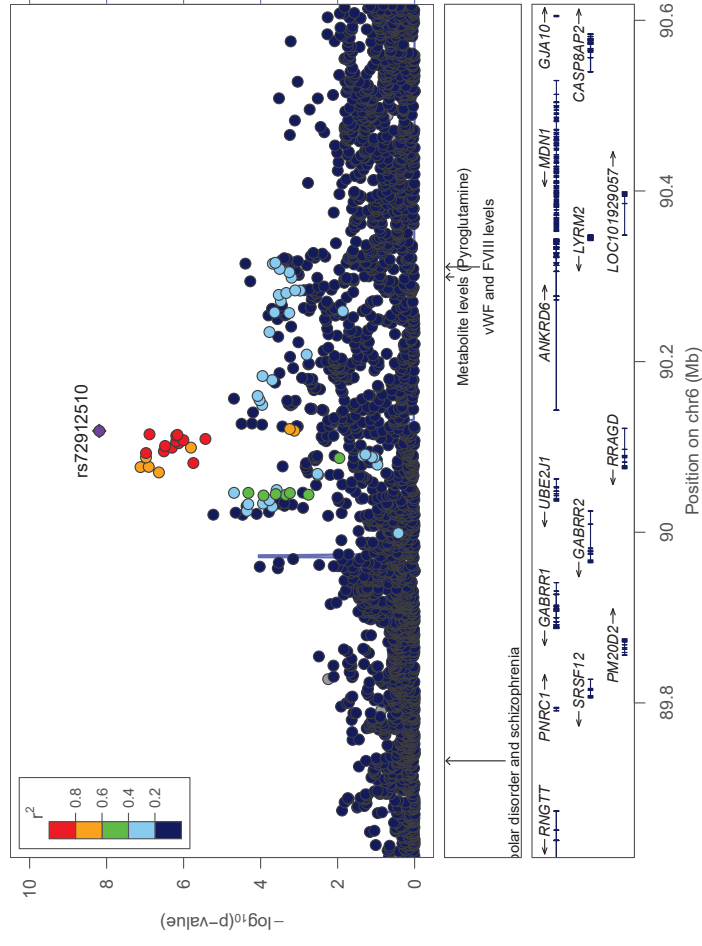

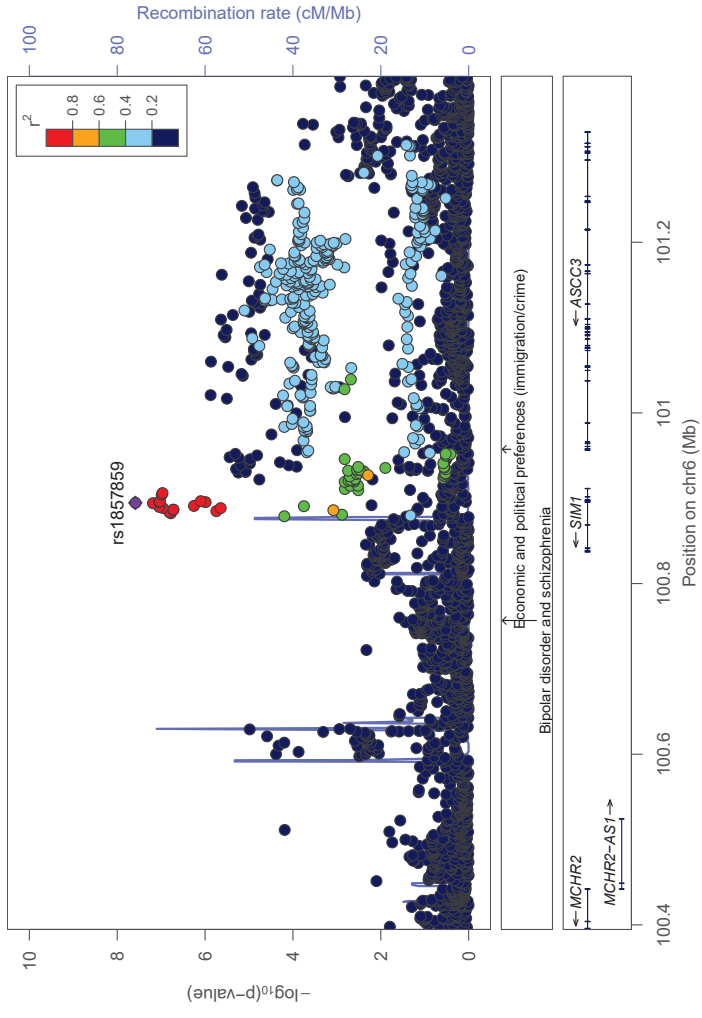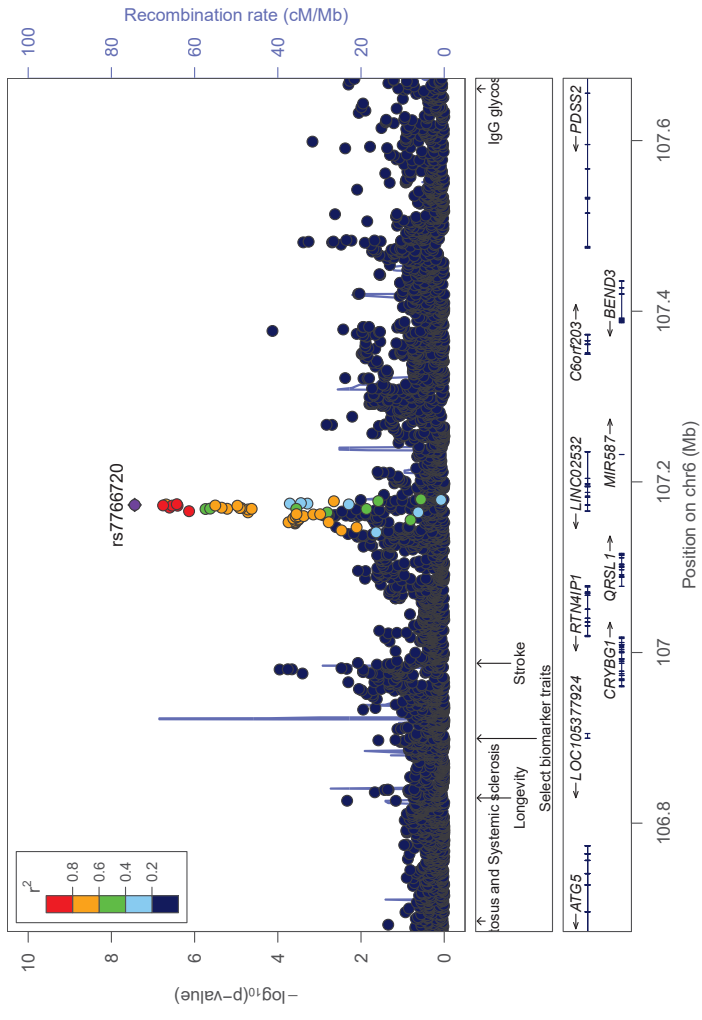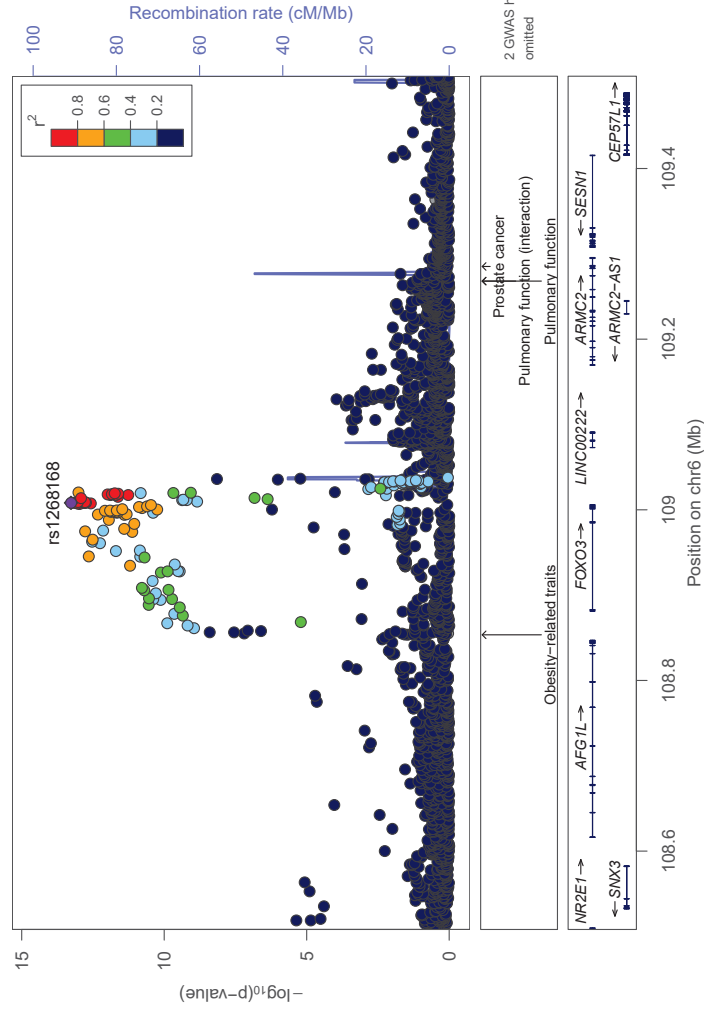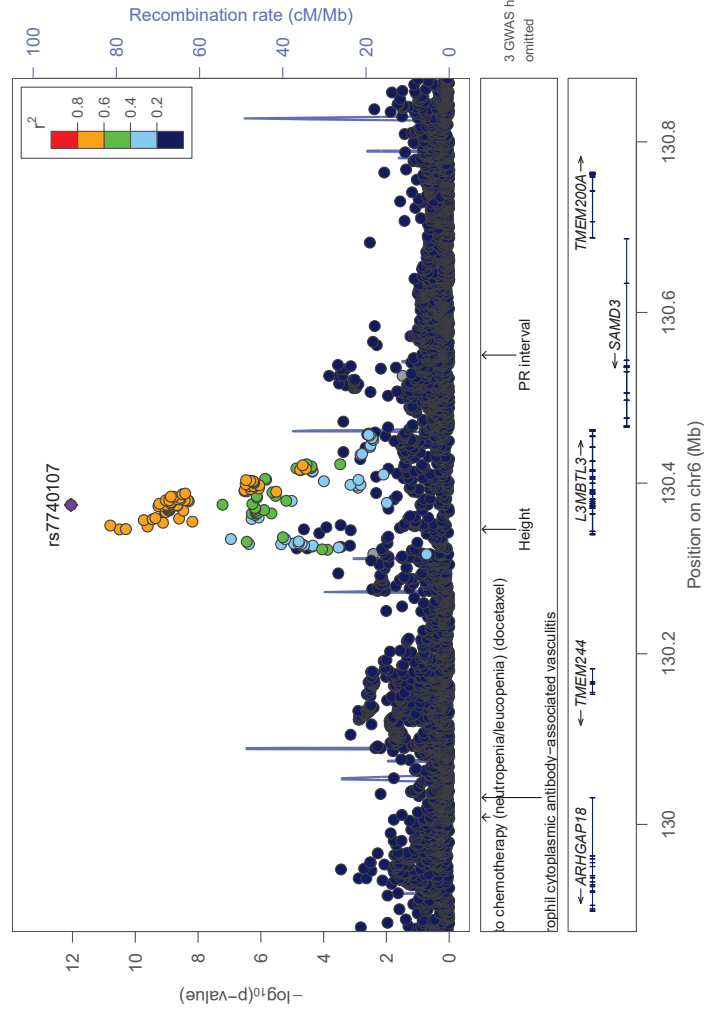

2 GWAS hits omitted

3 GWAS hits omitted

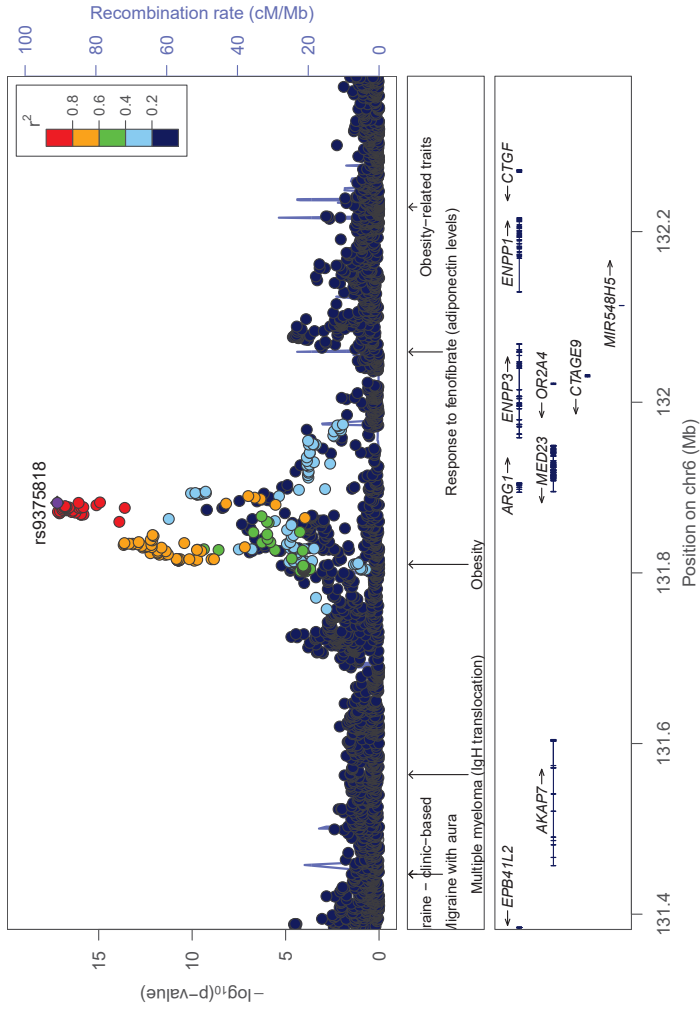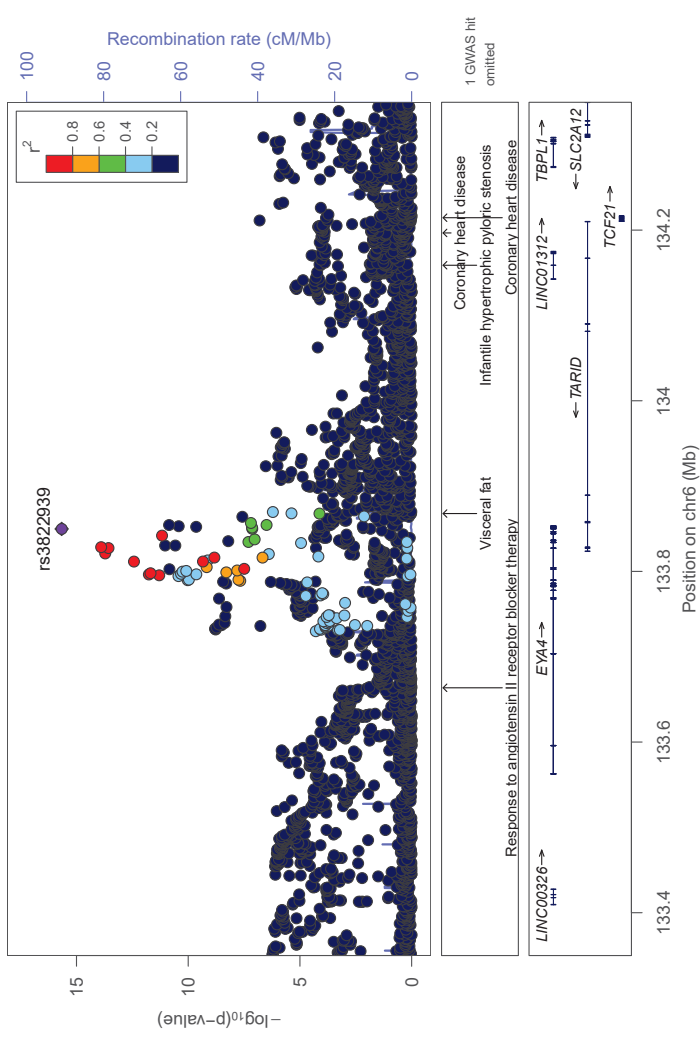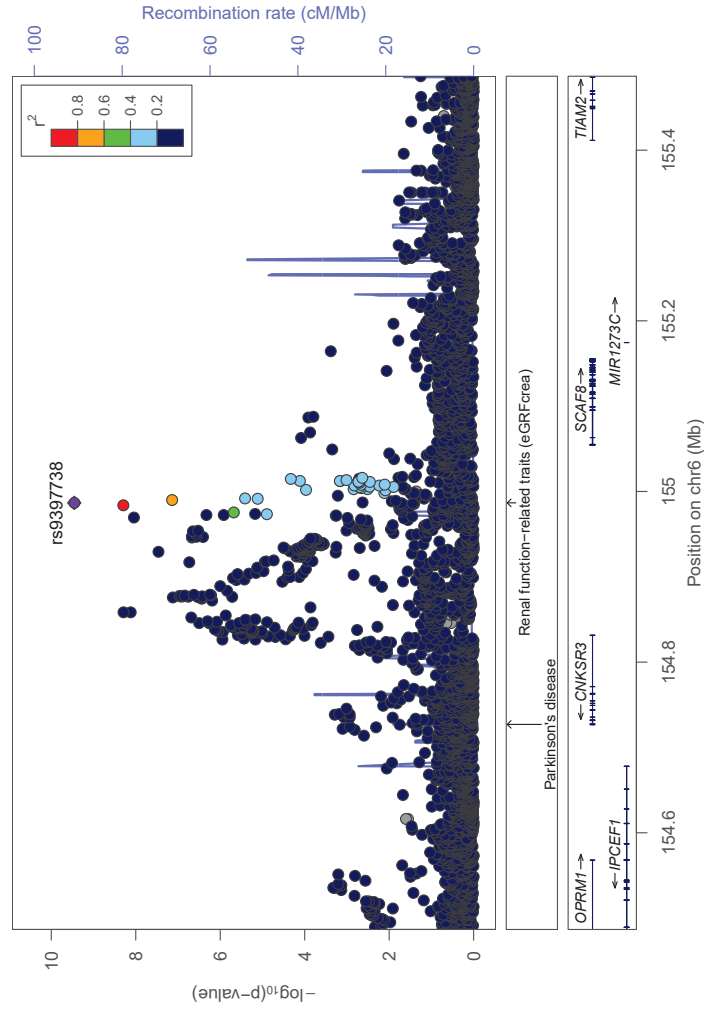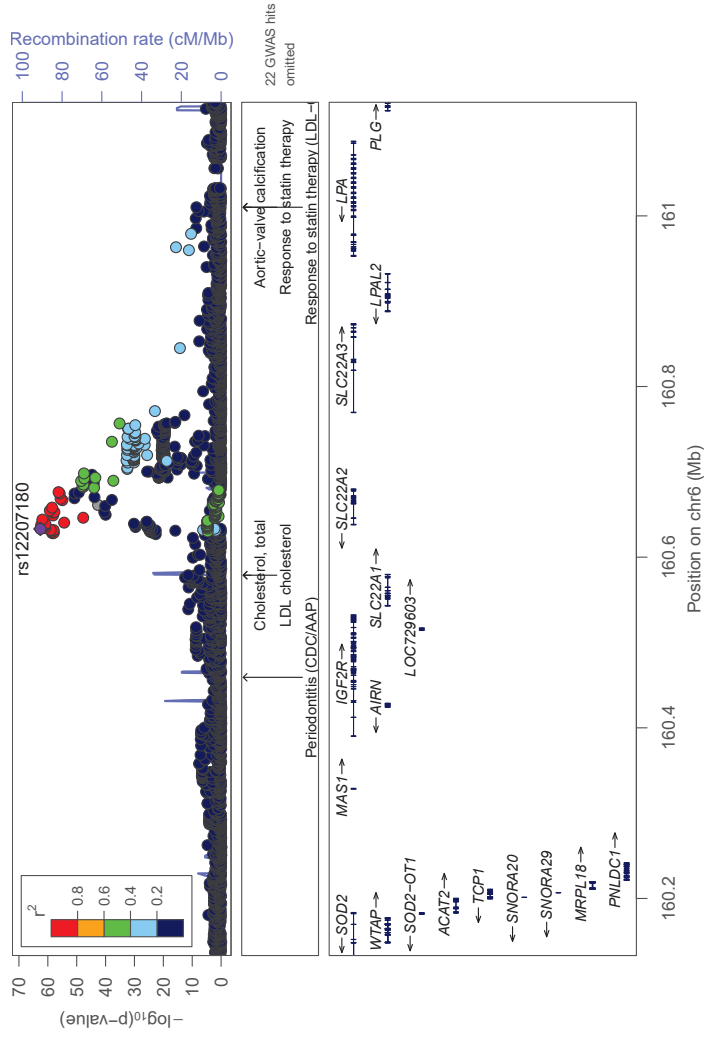

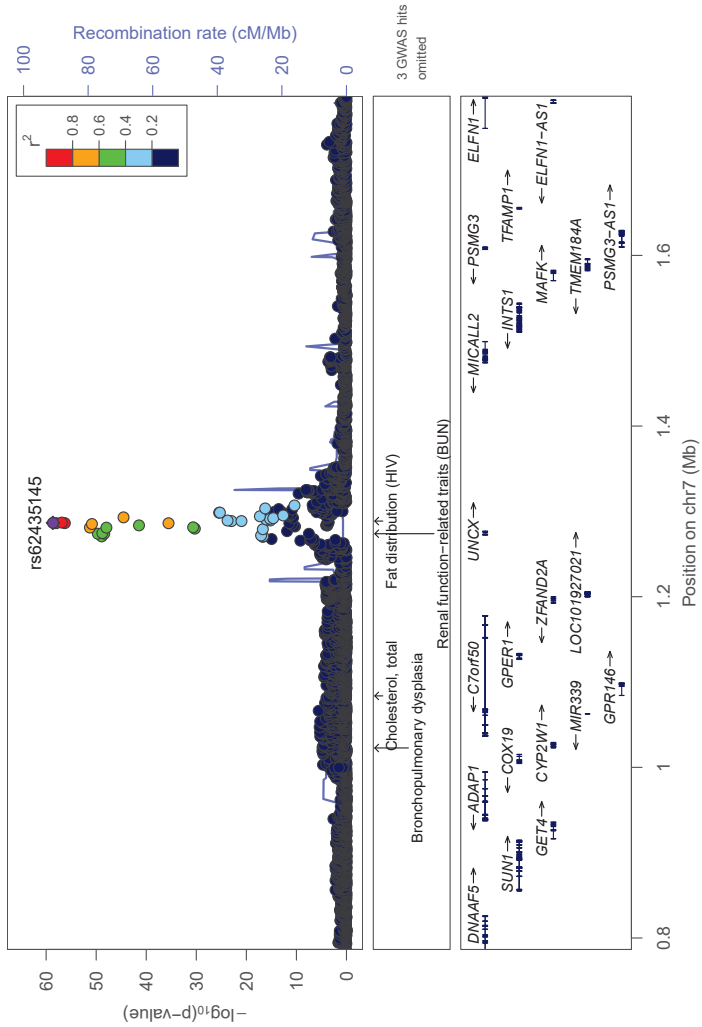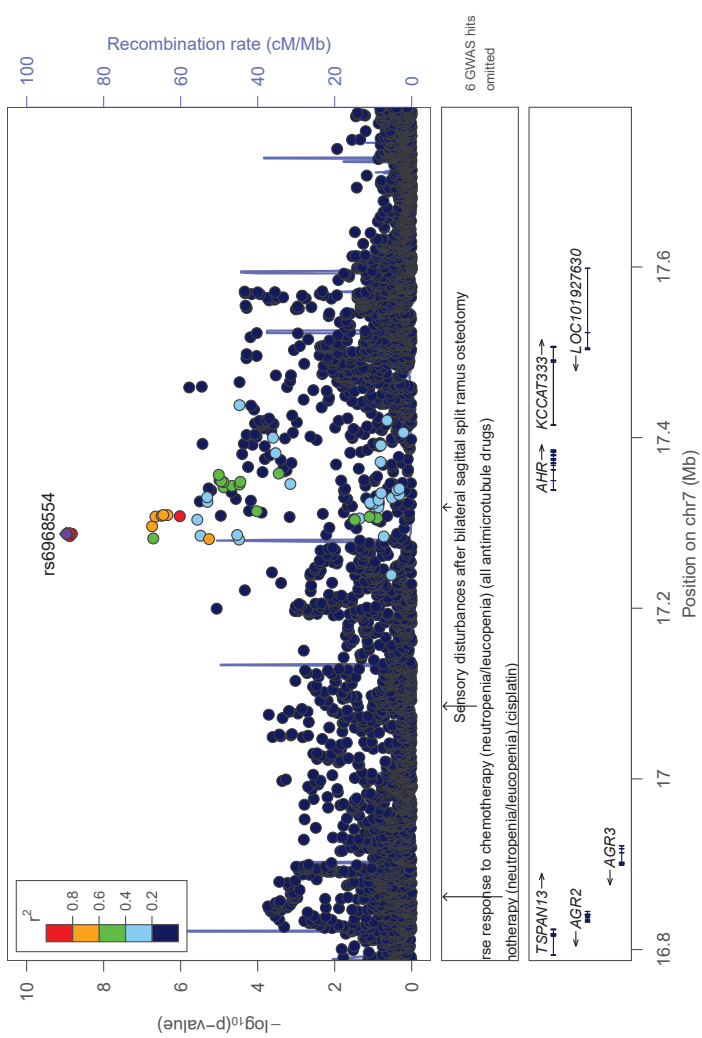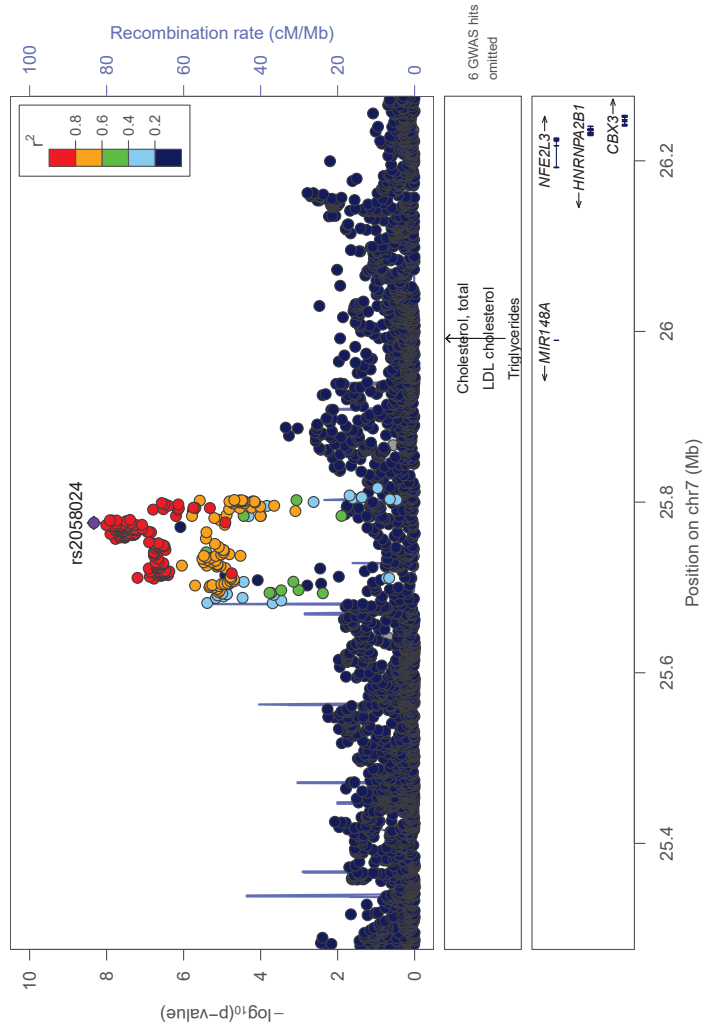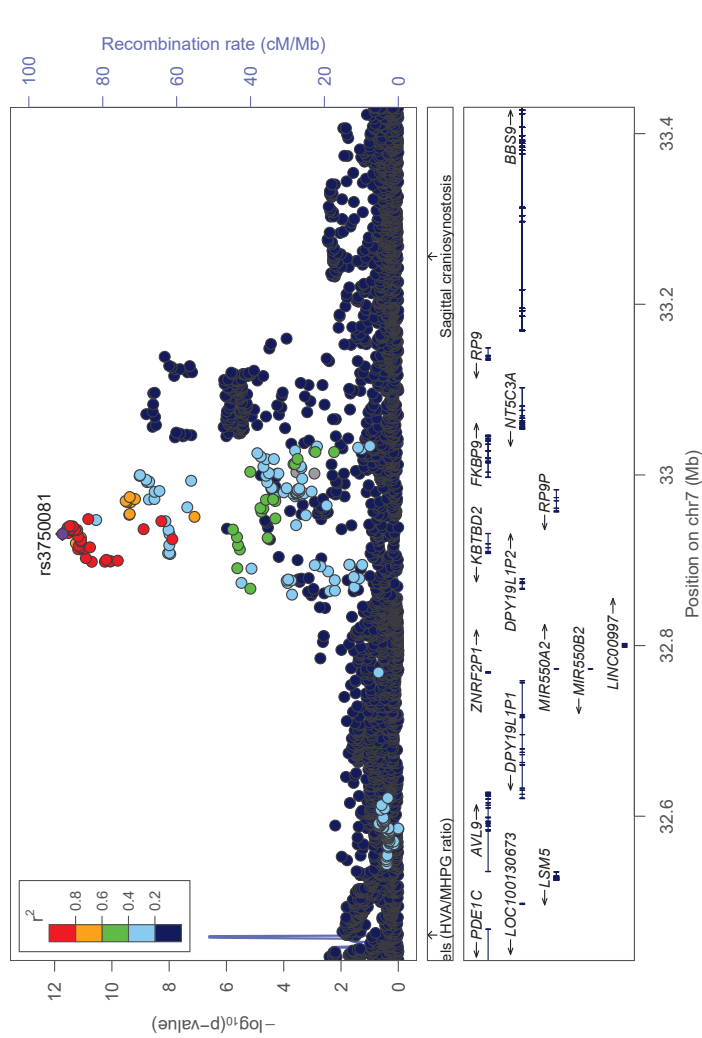

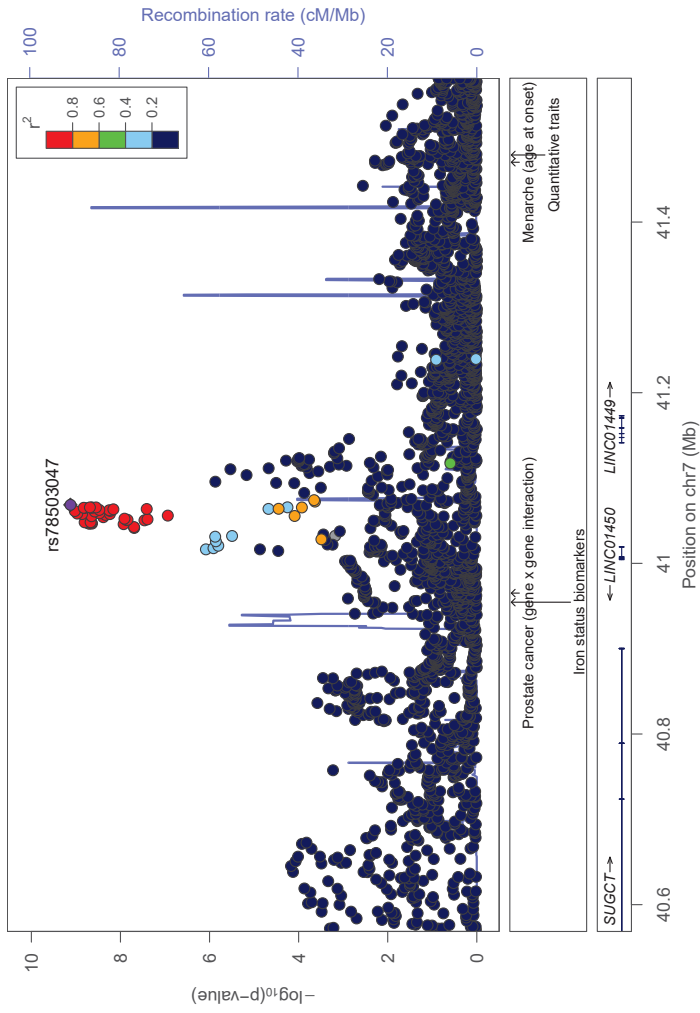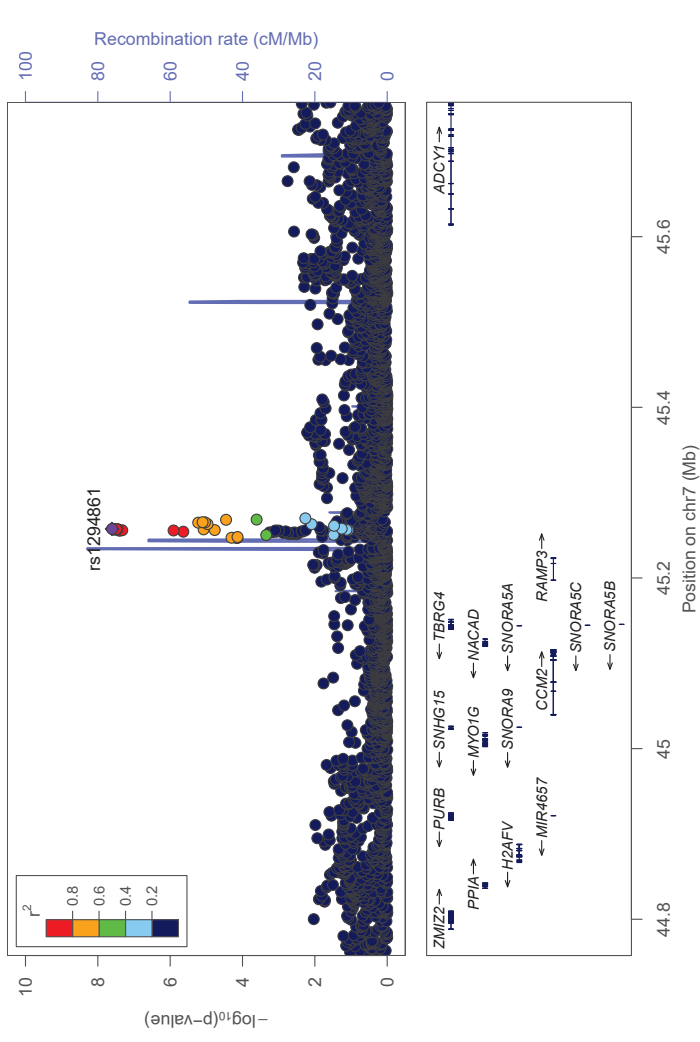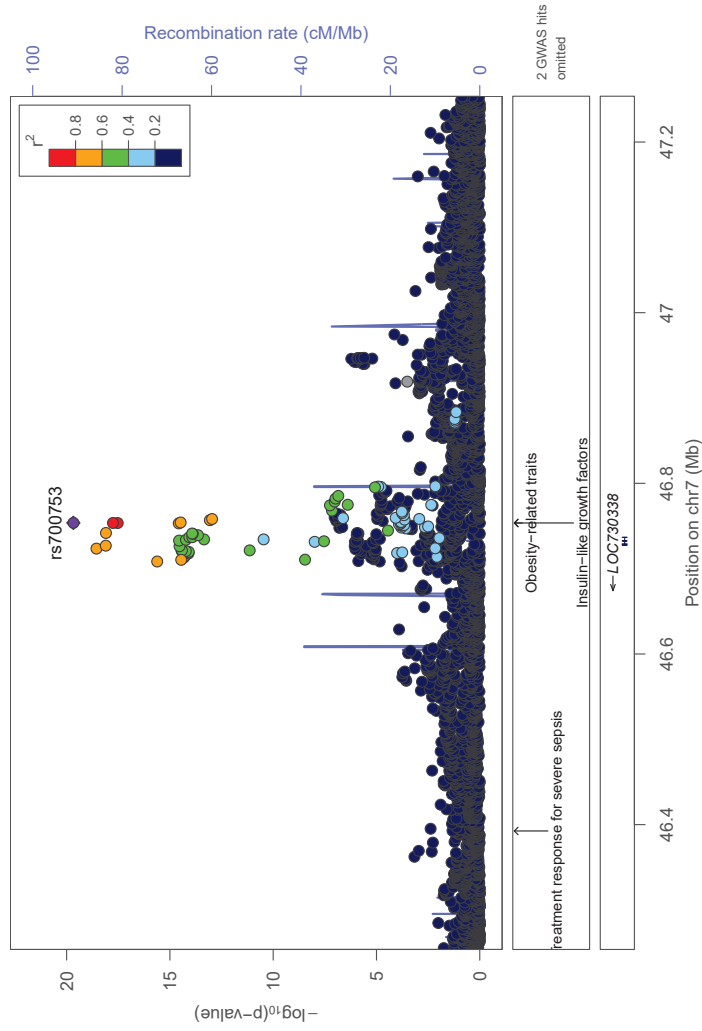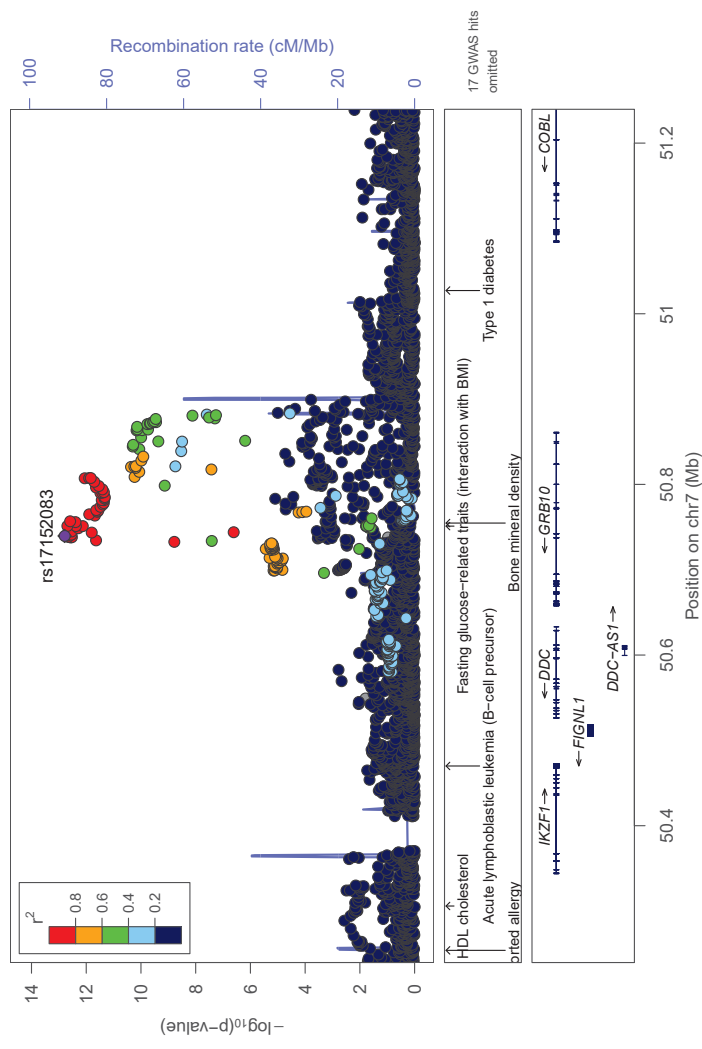

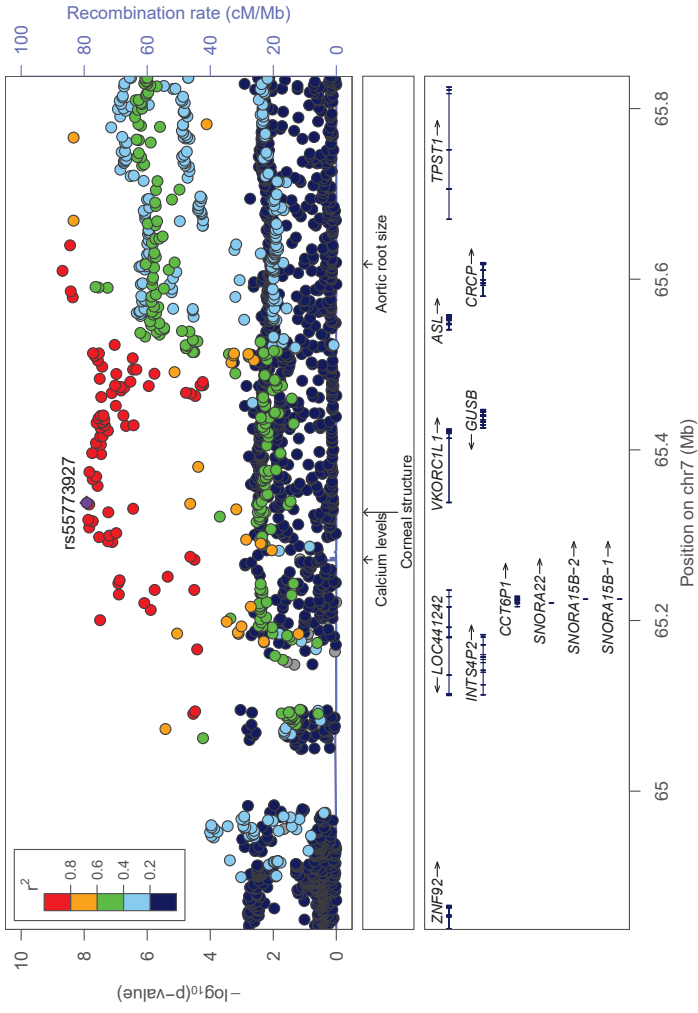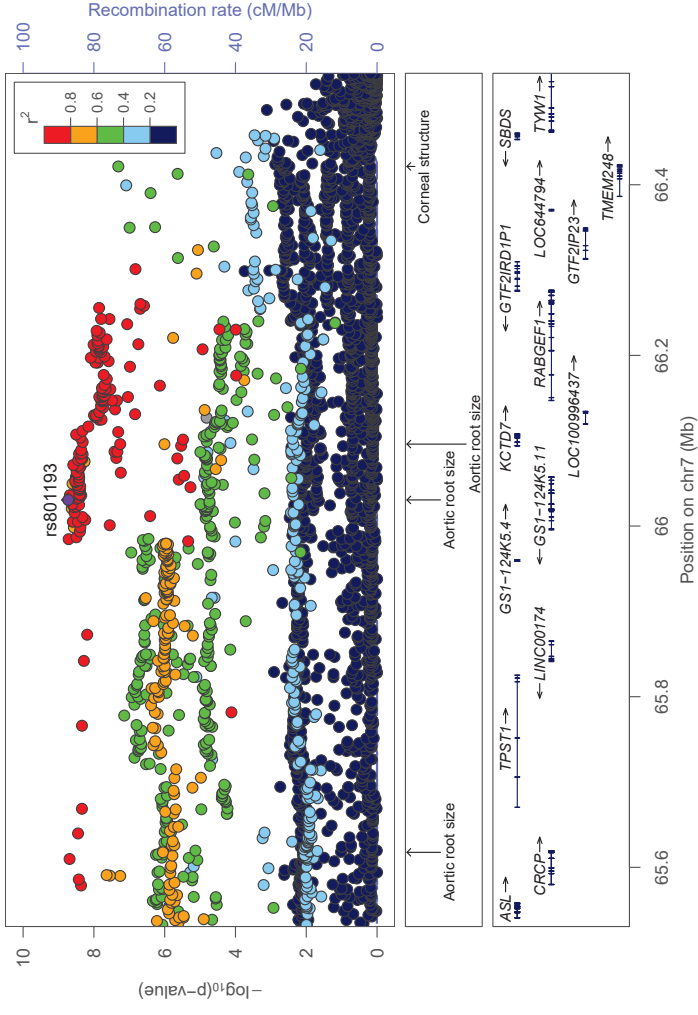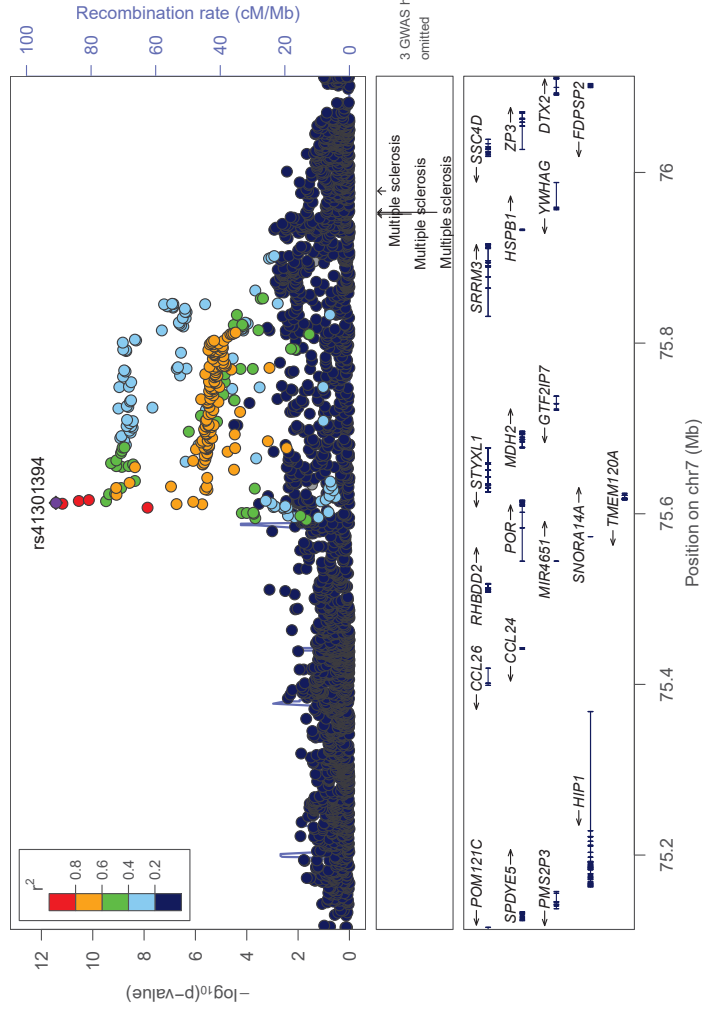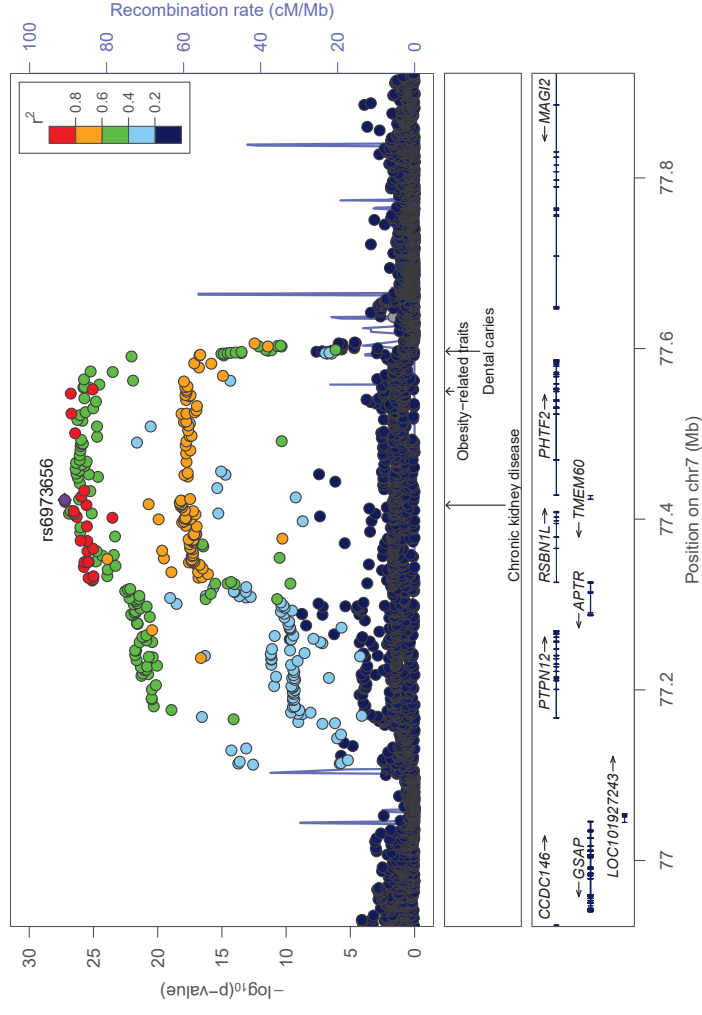

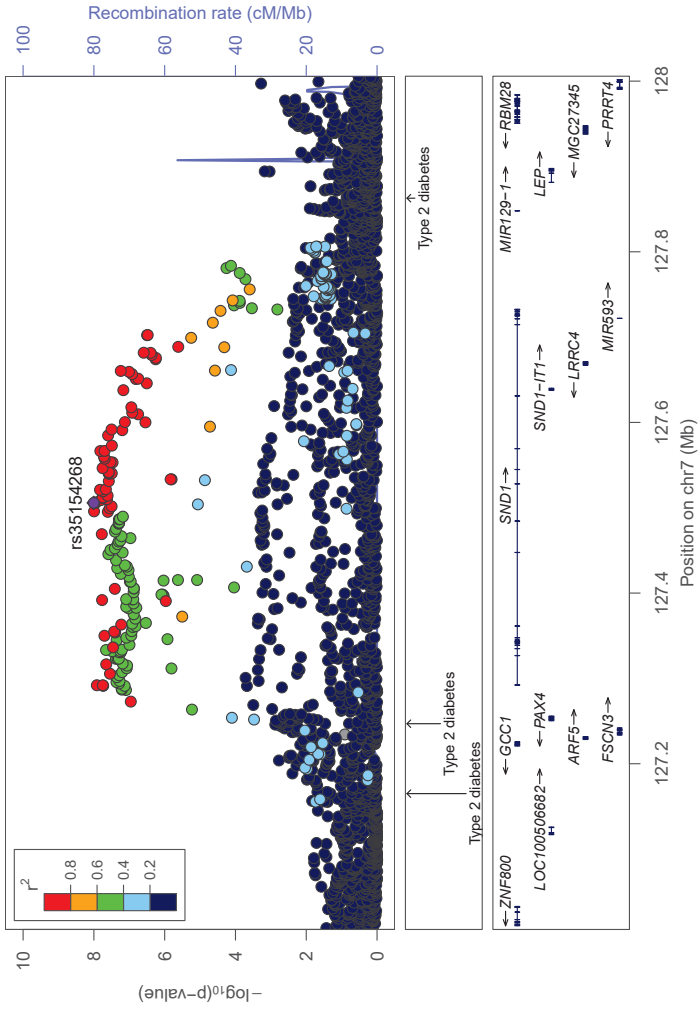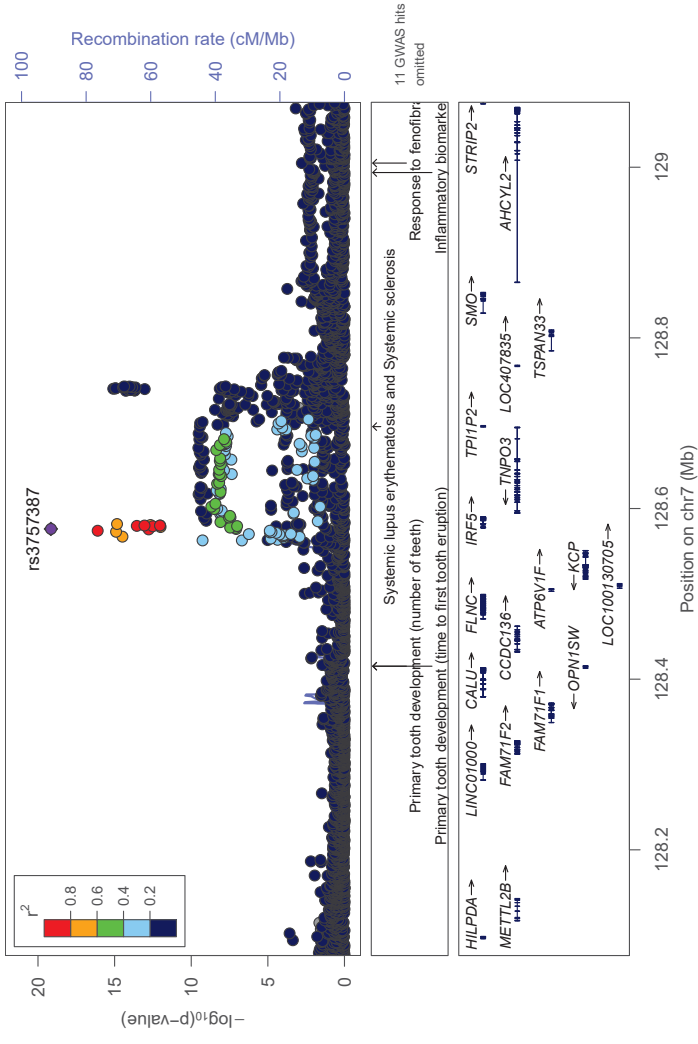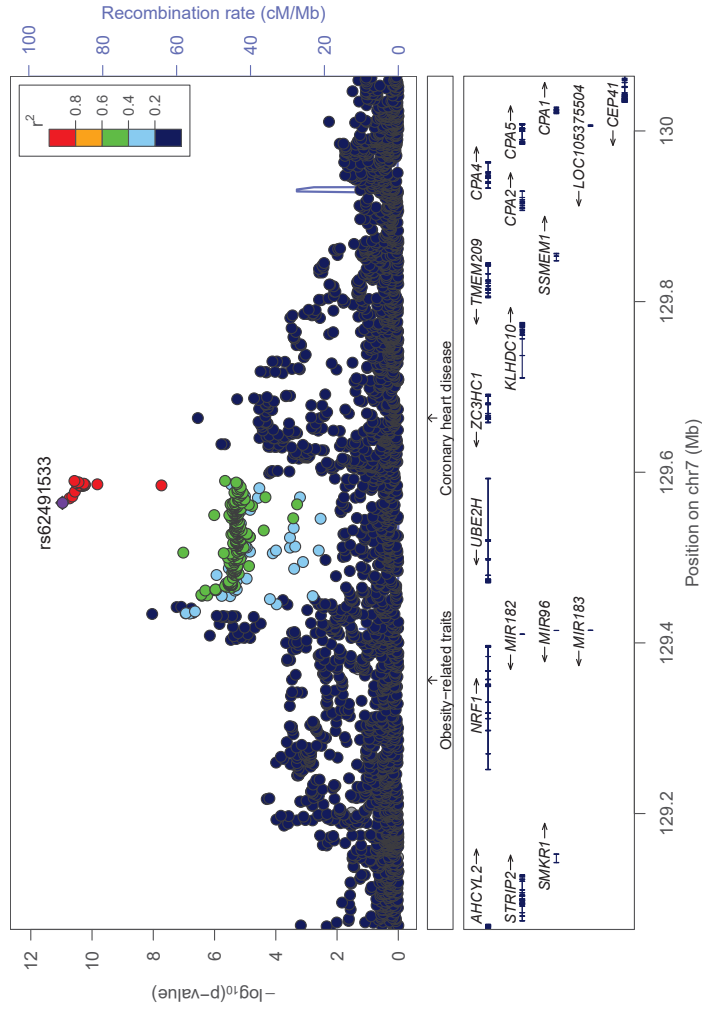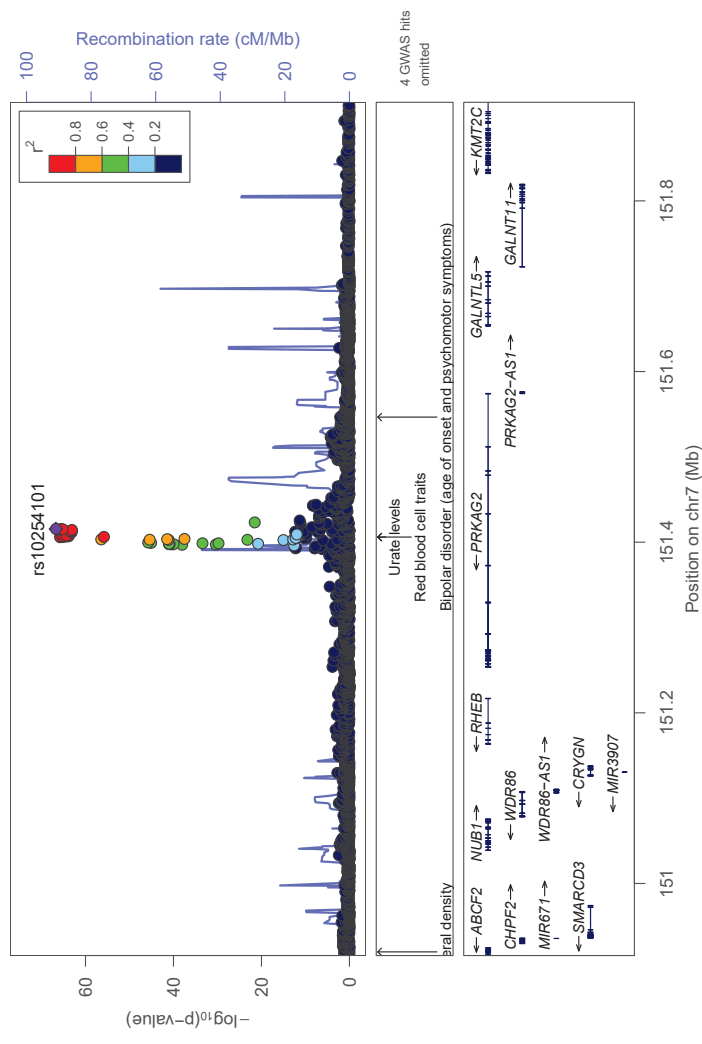



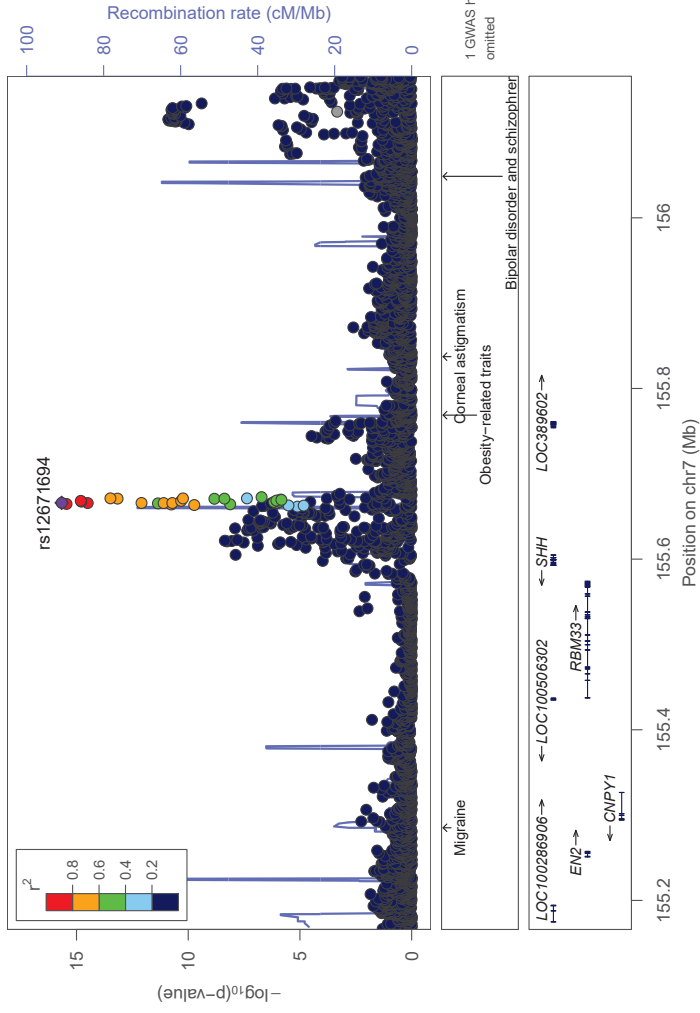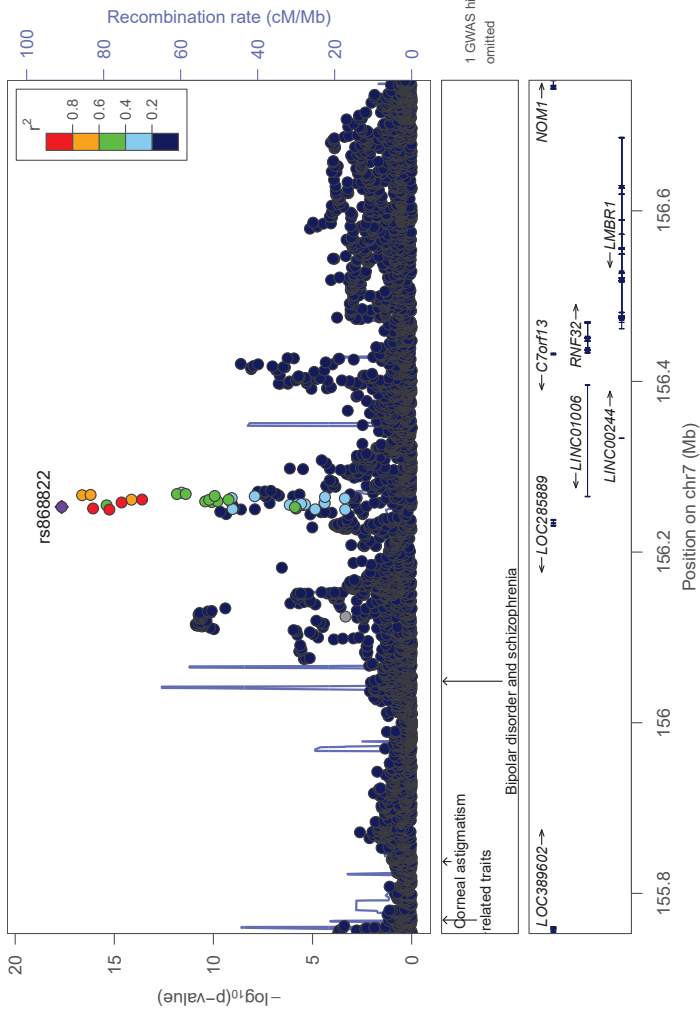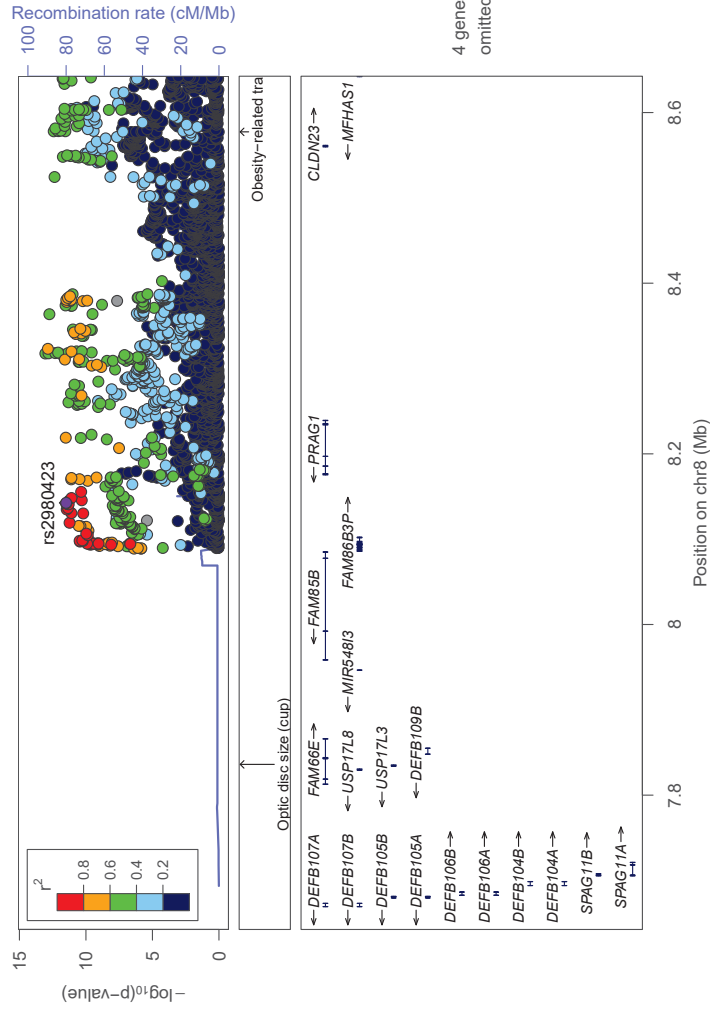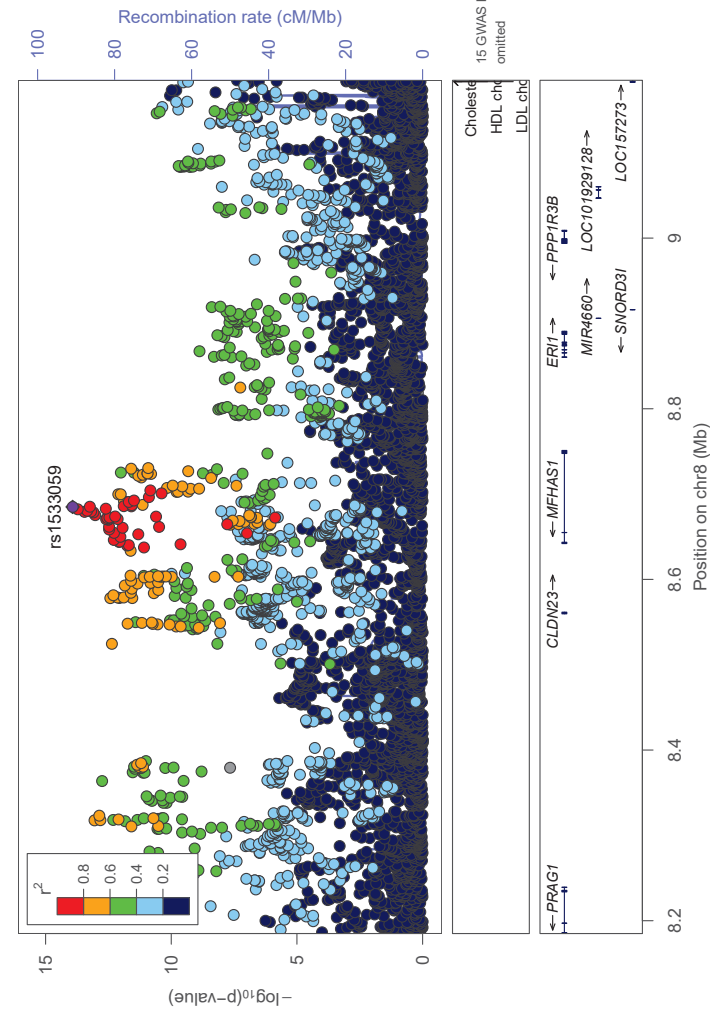

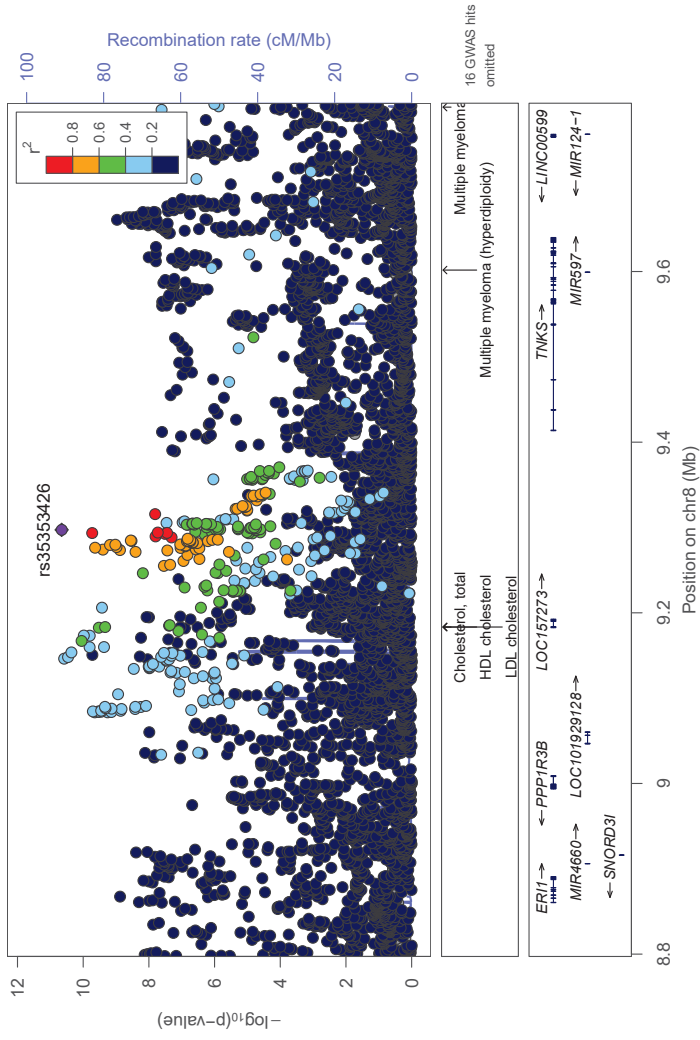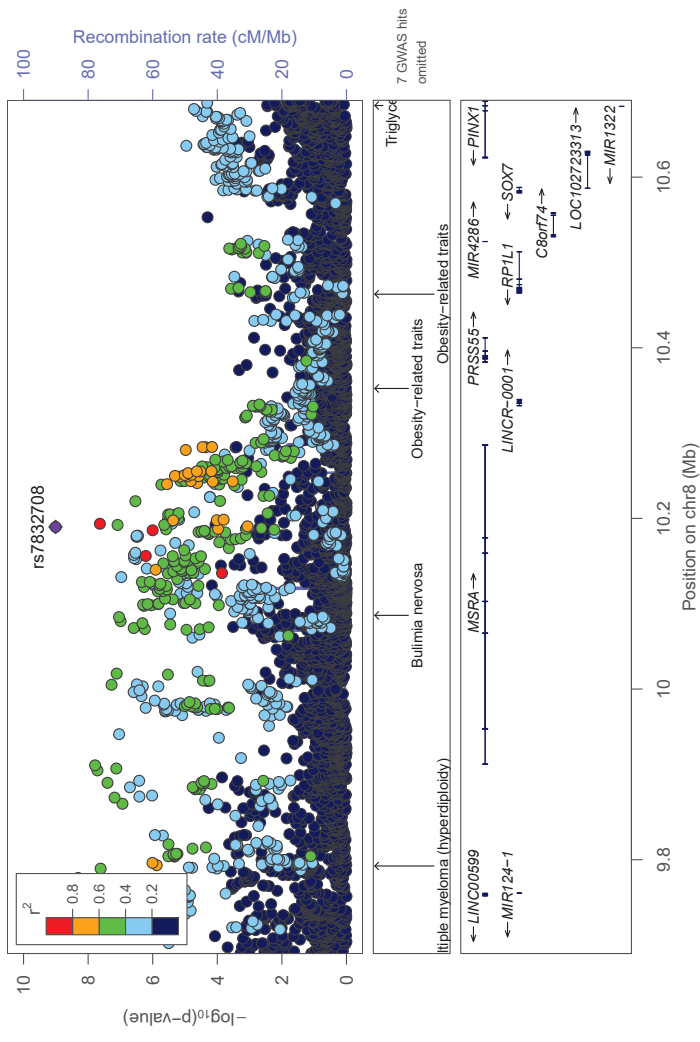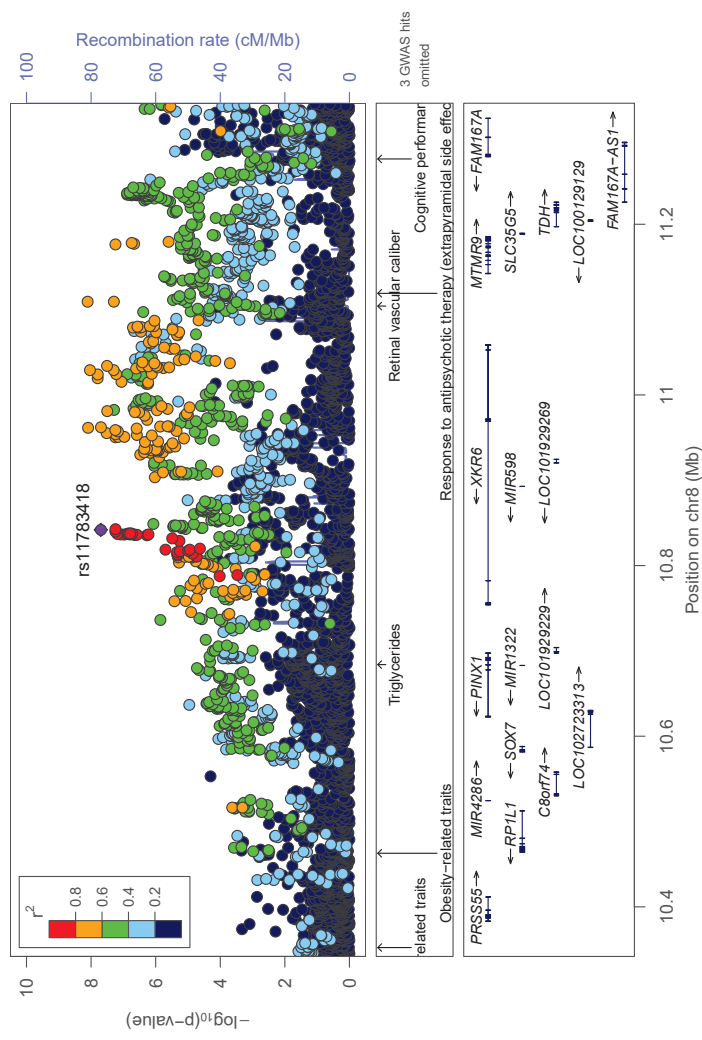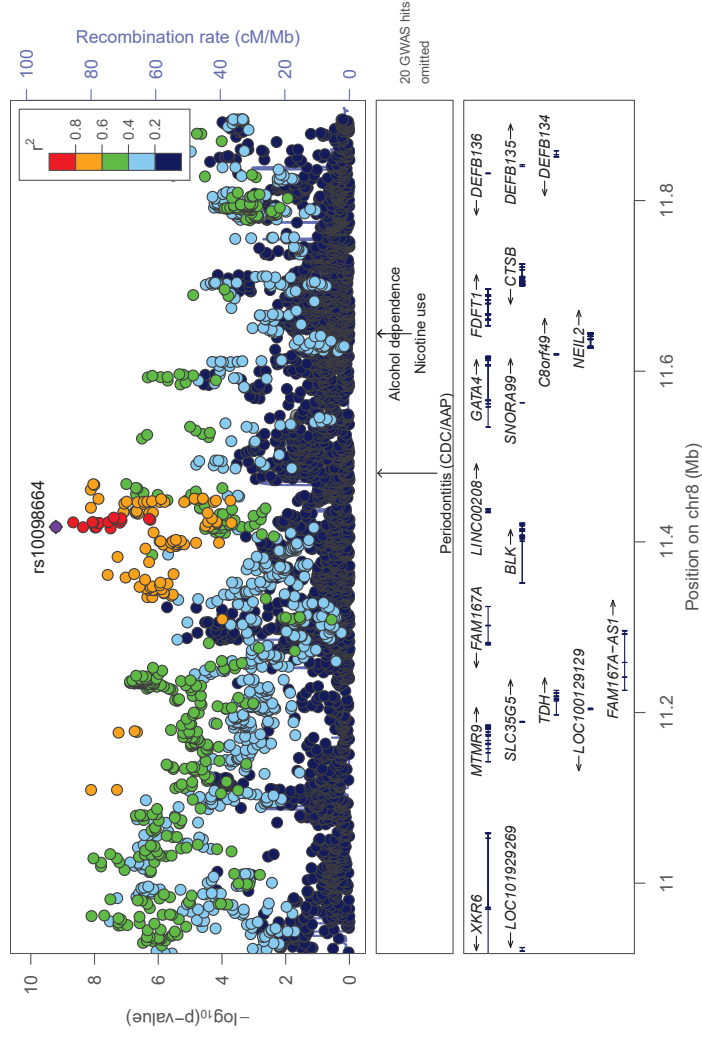

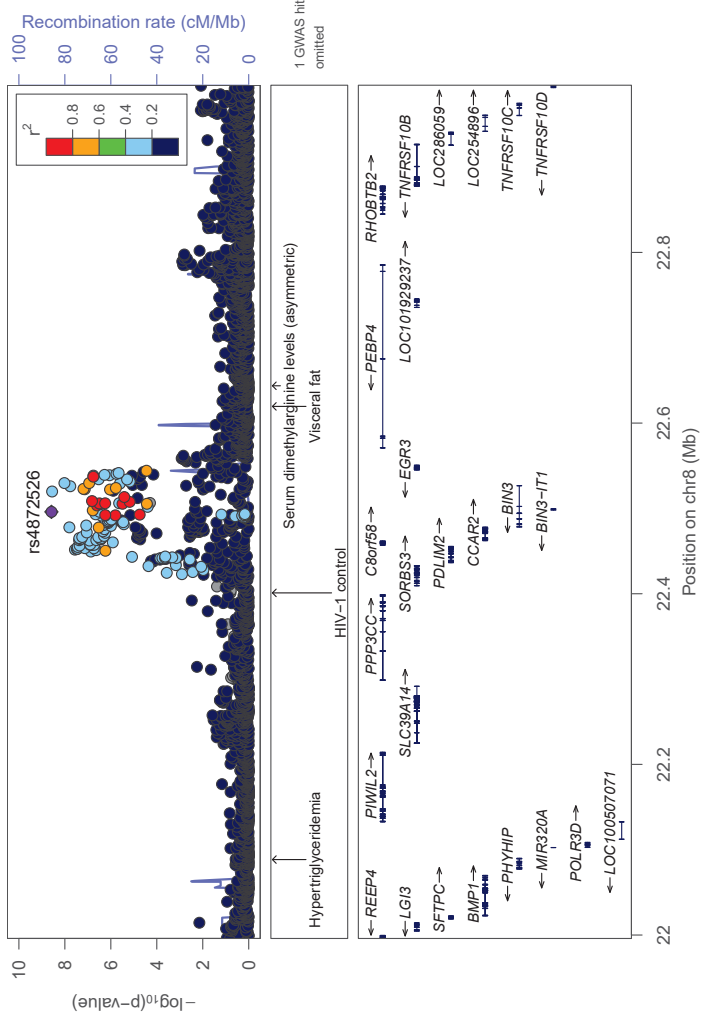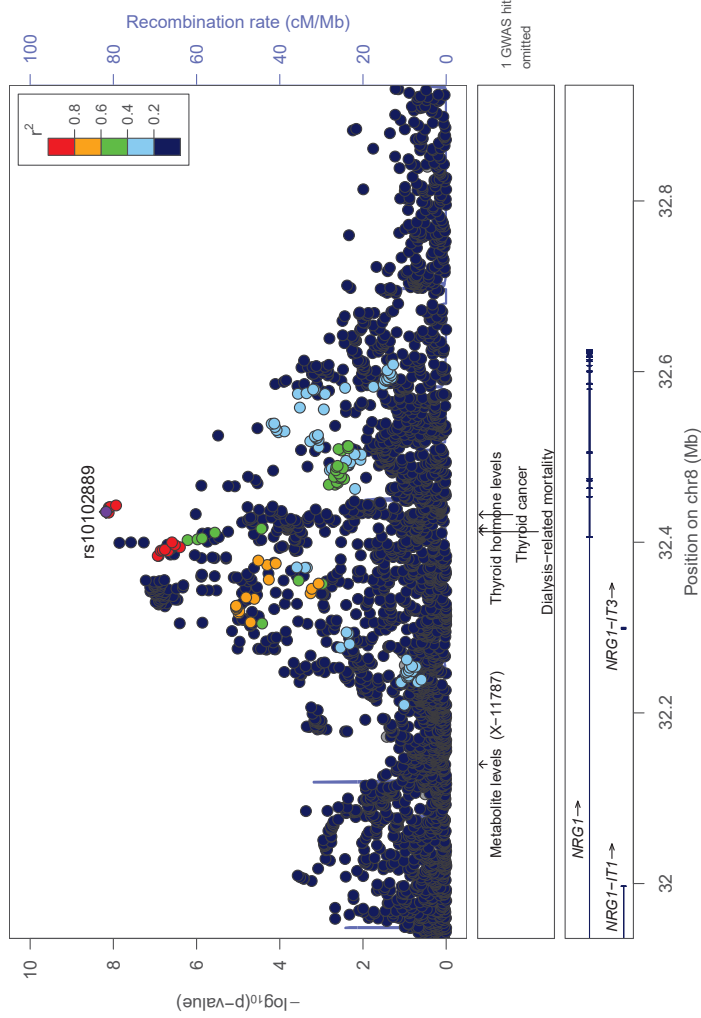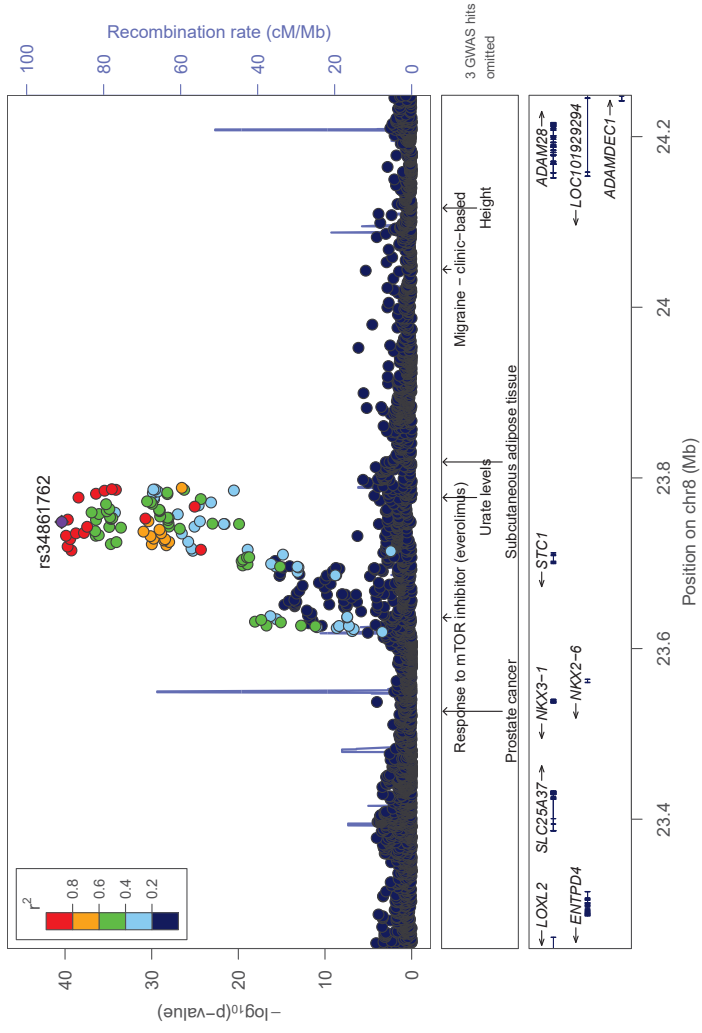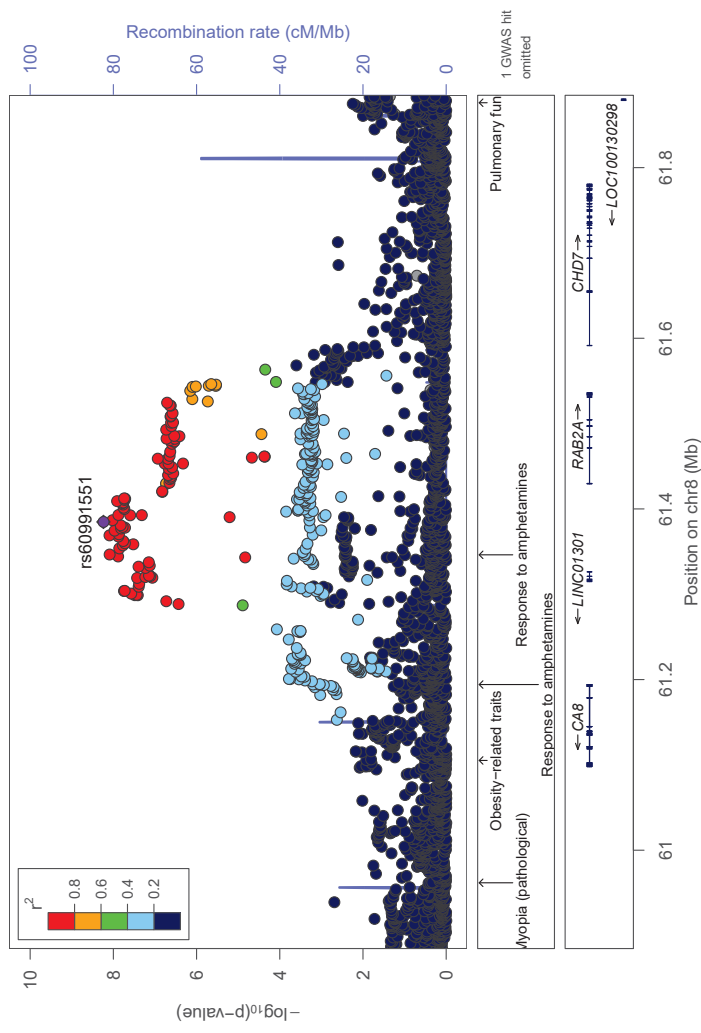

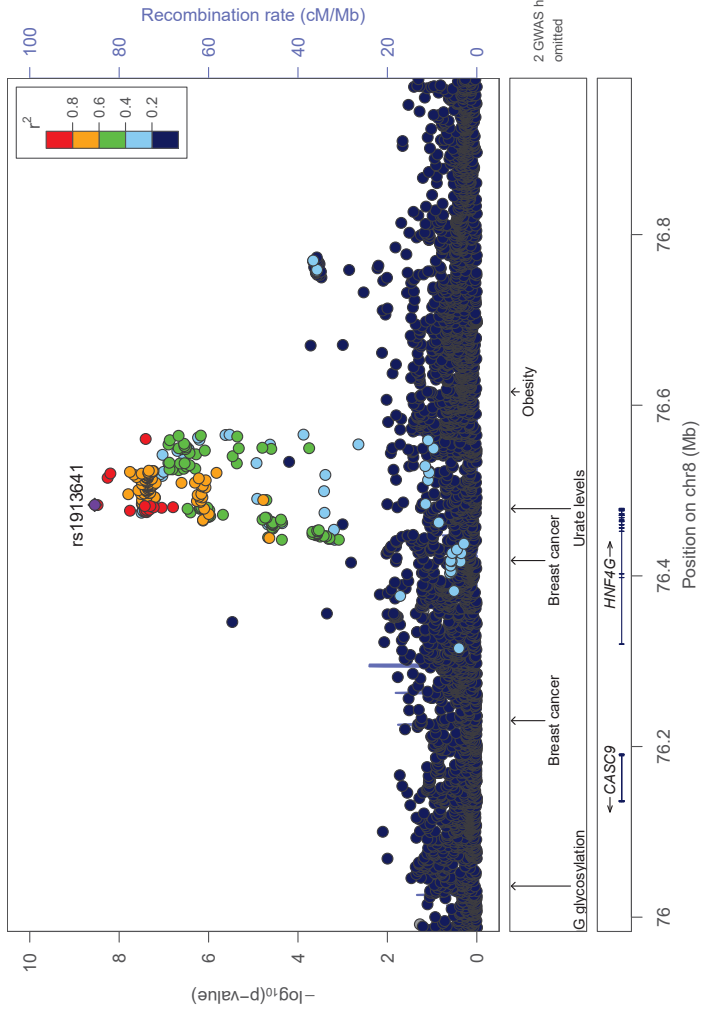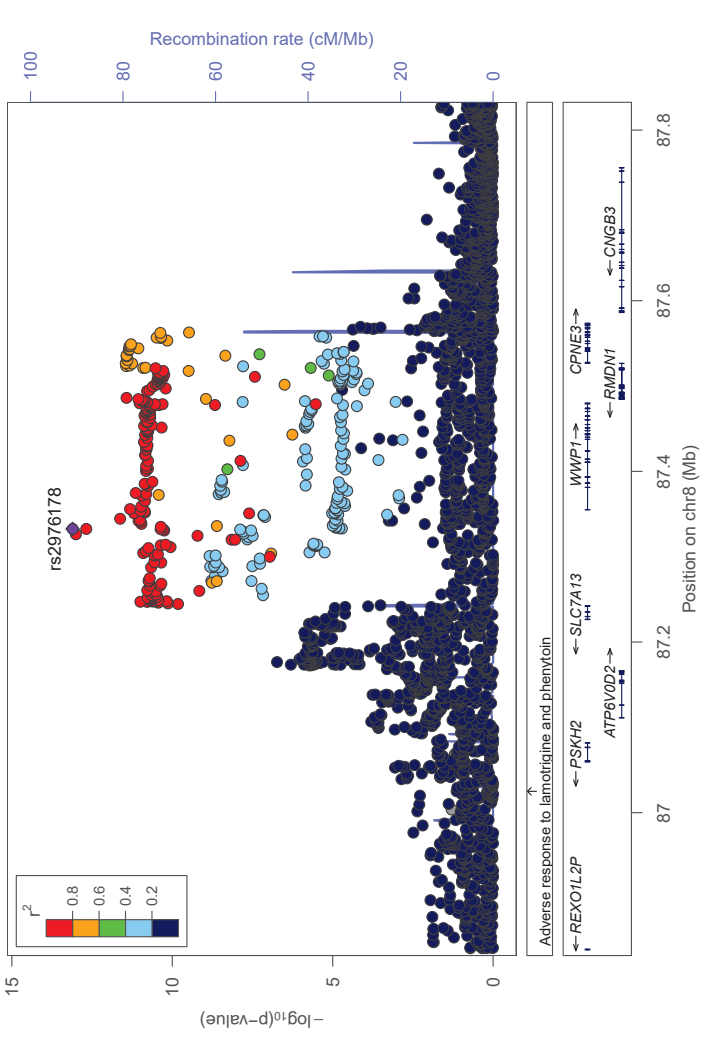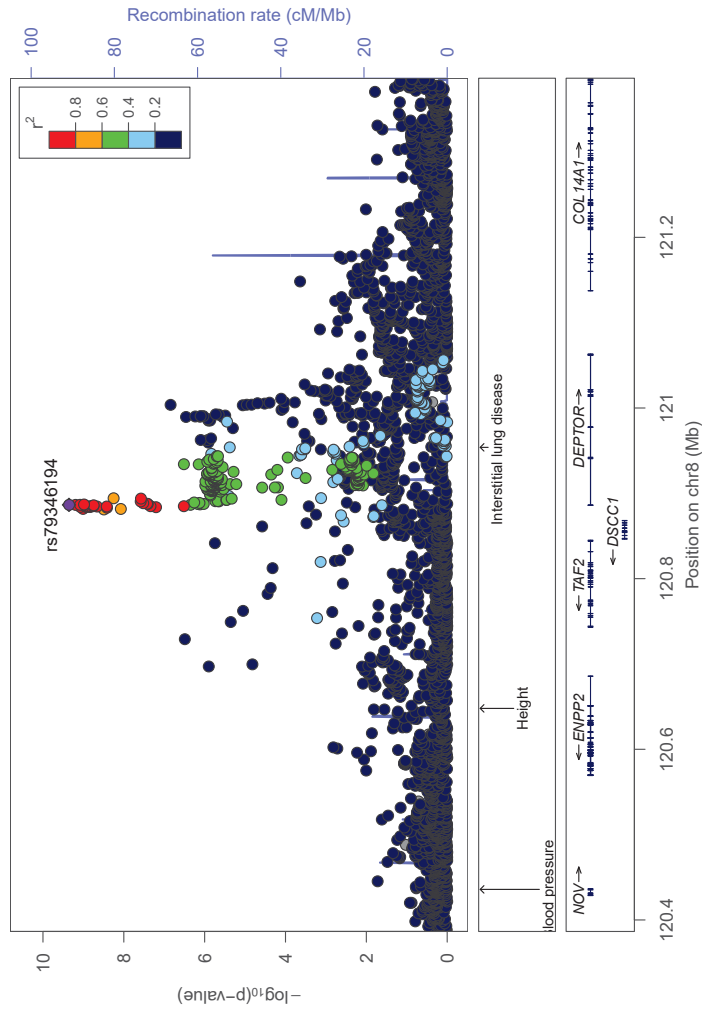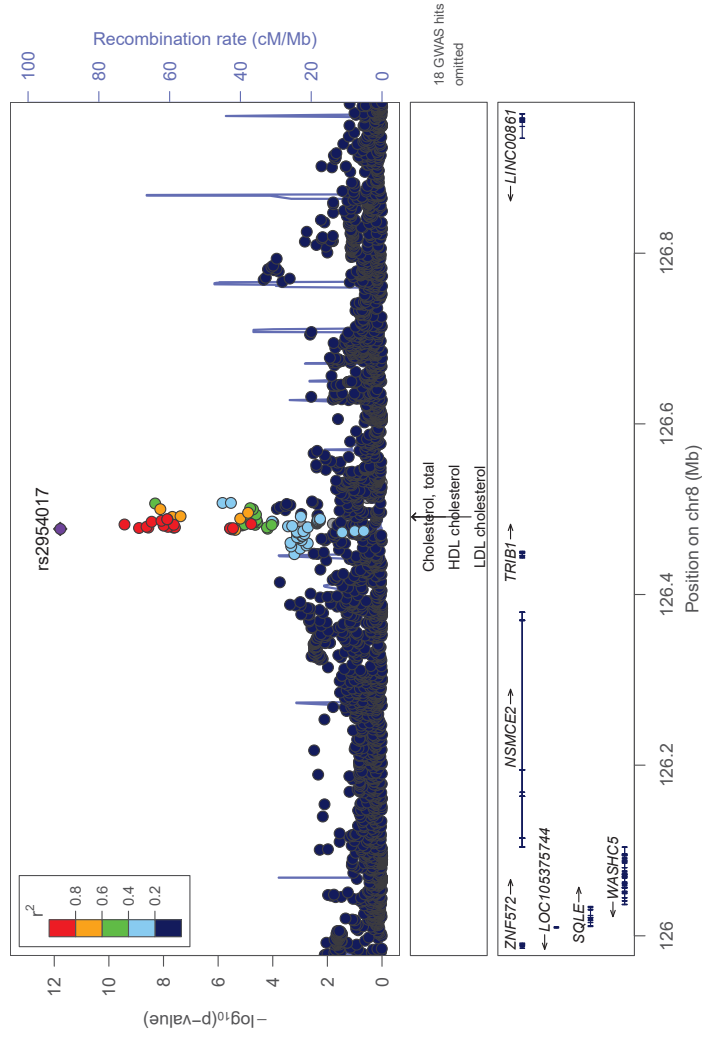

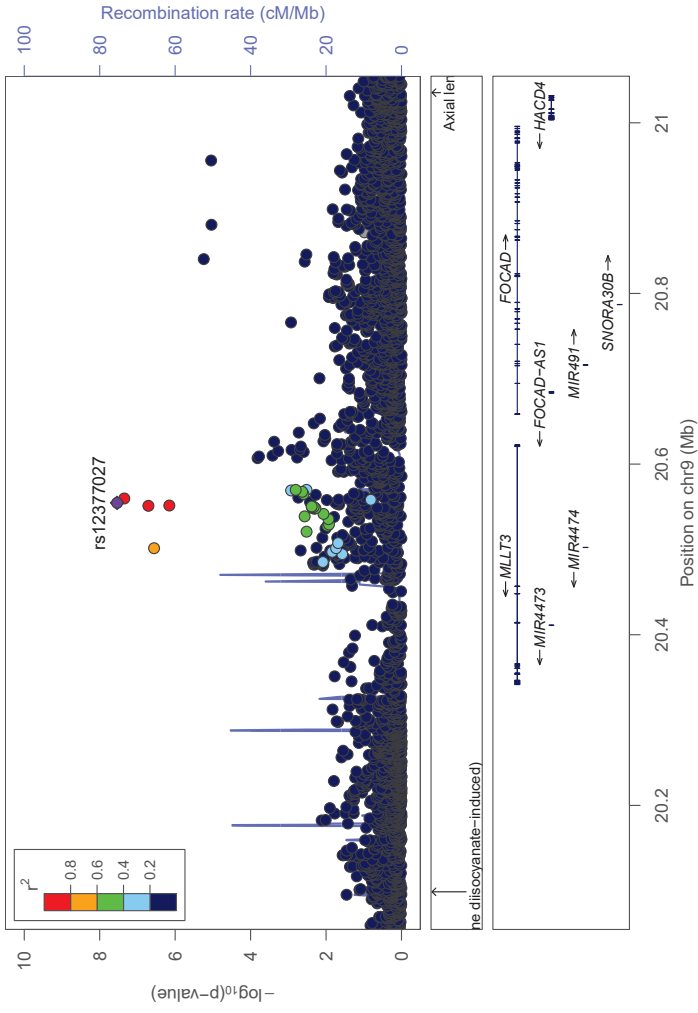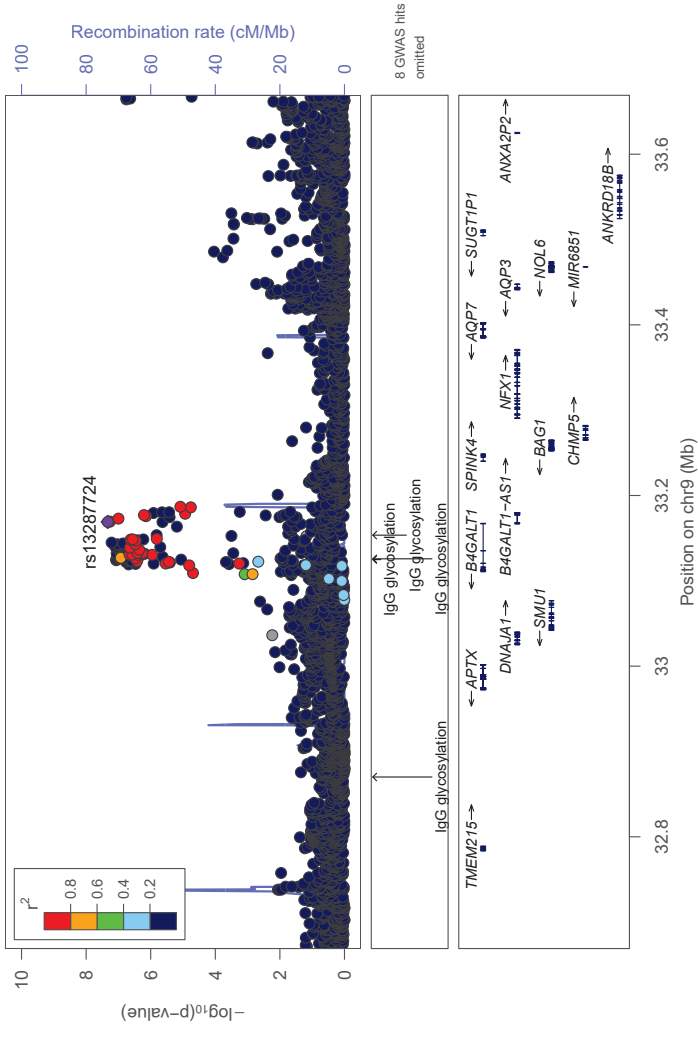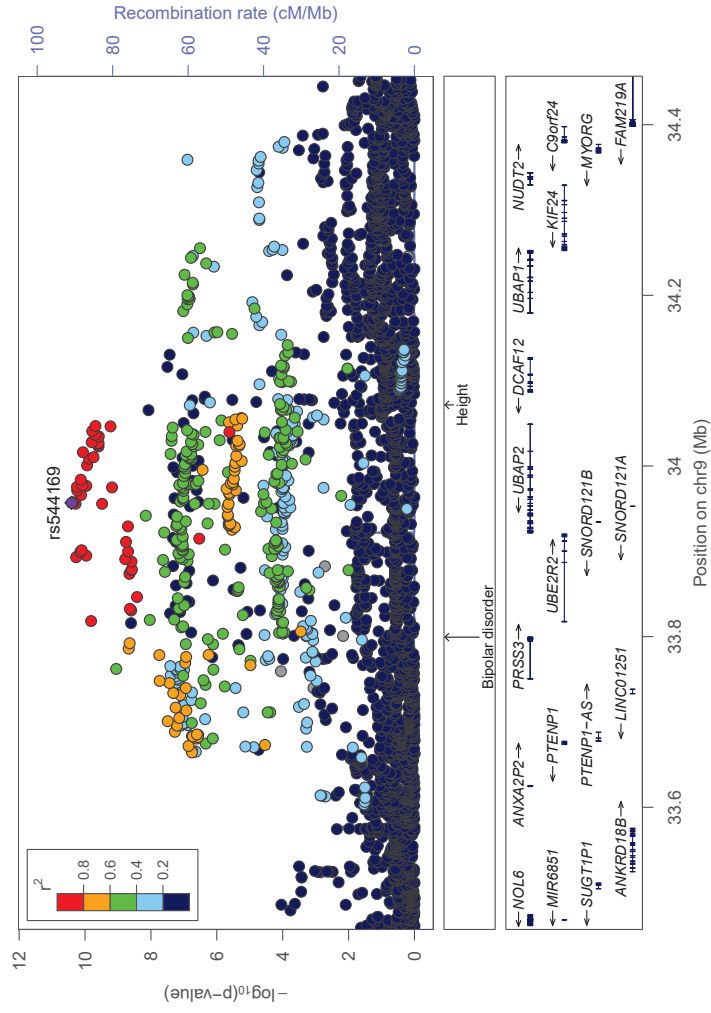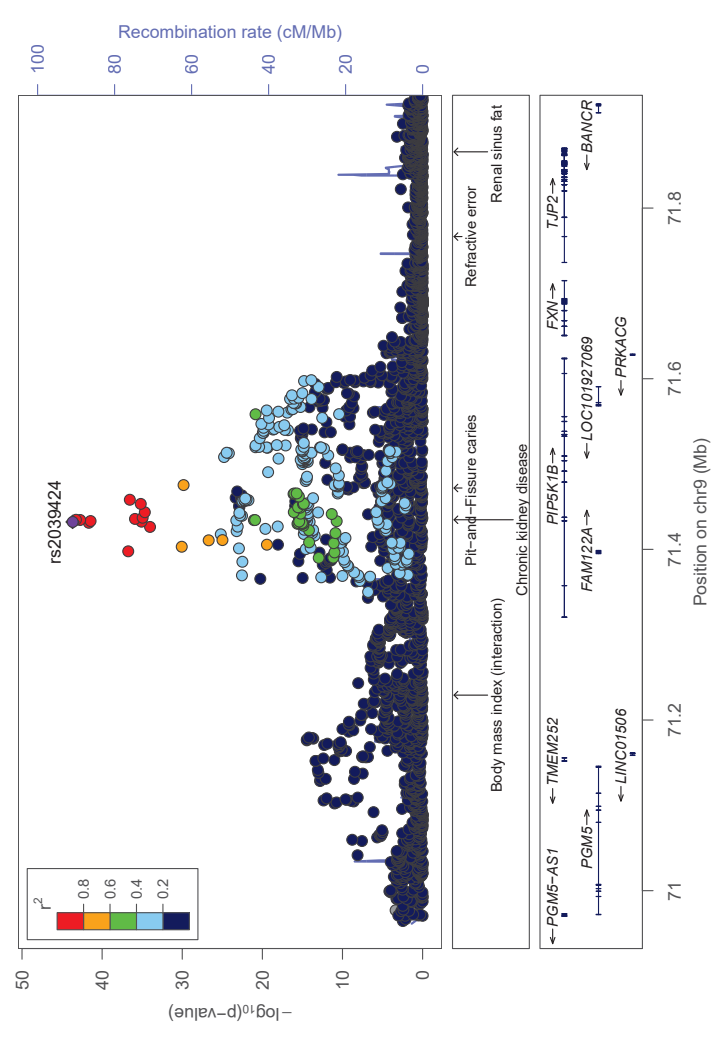

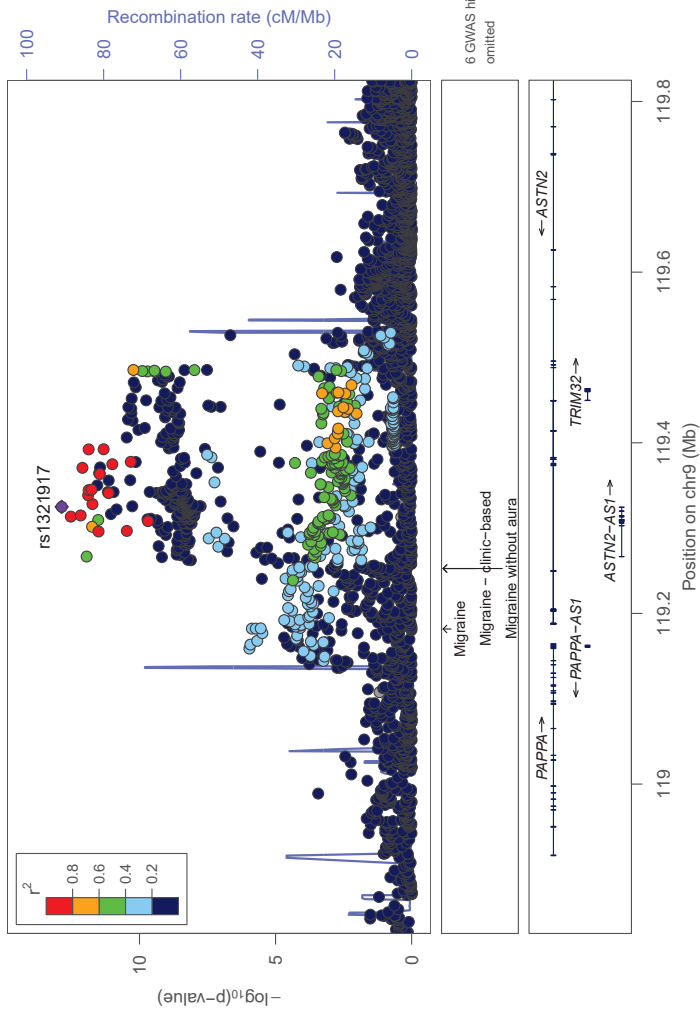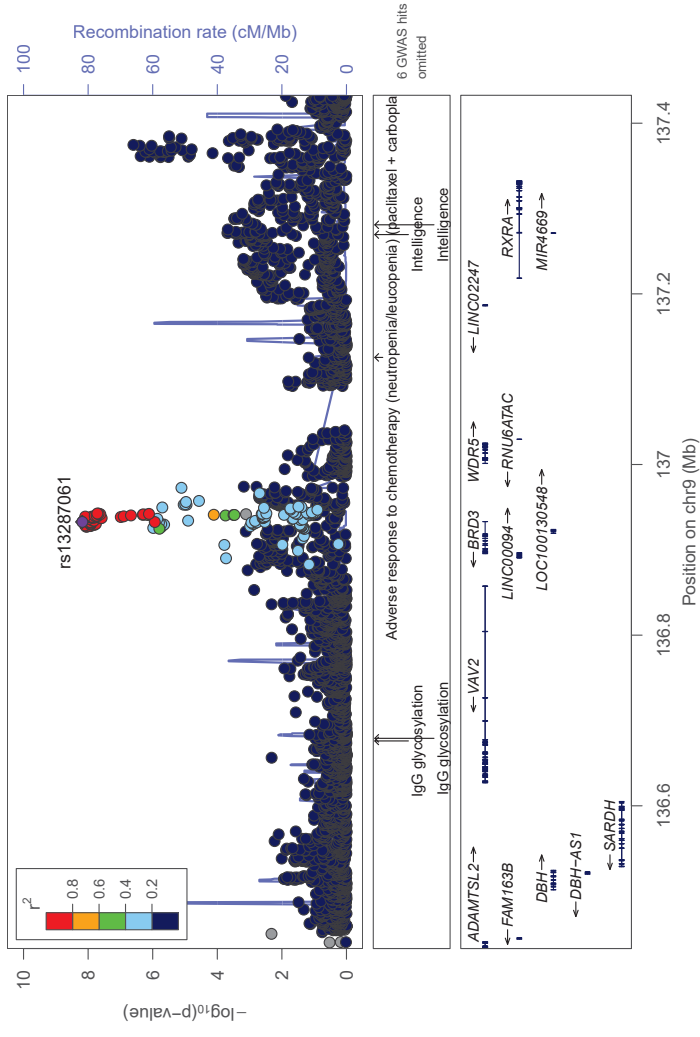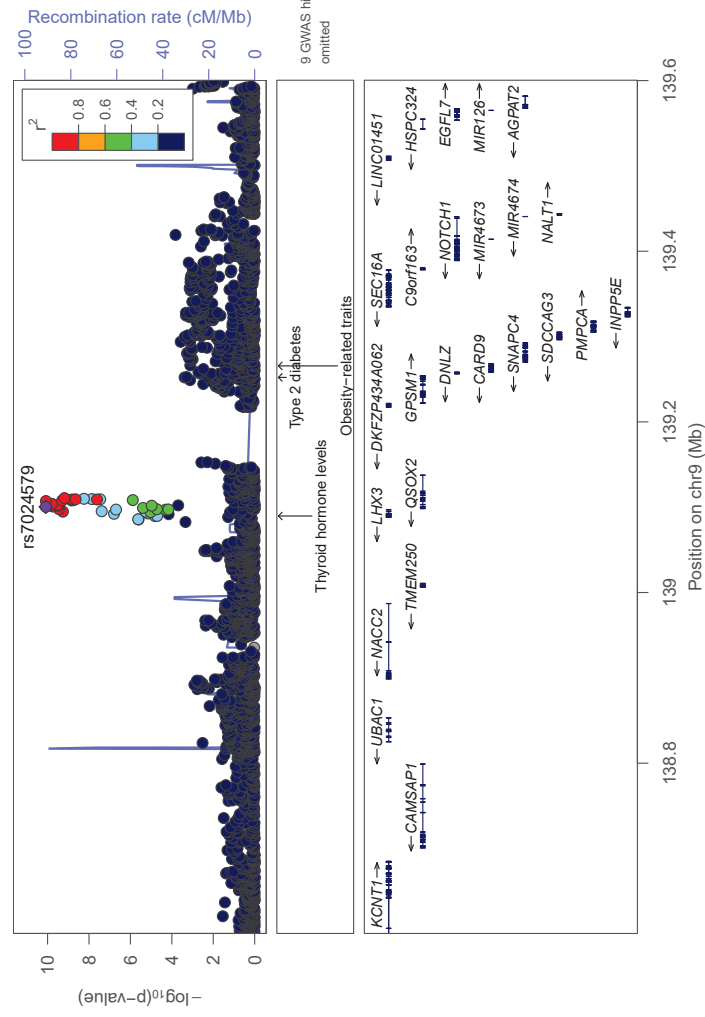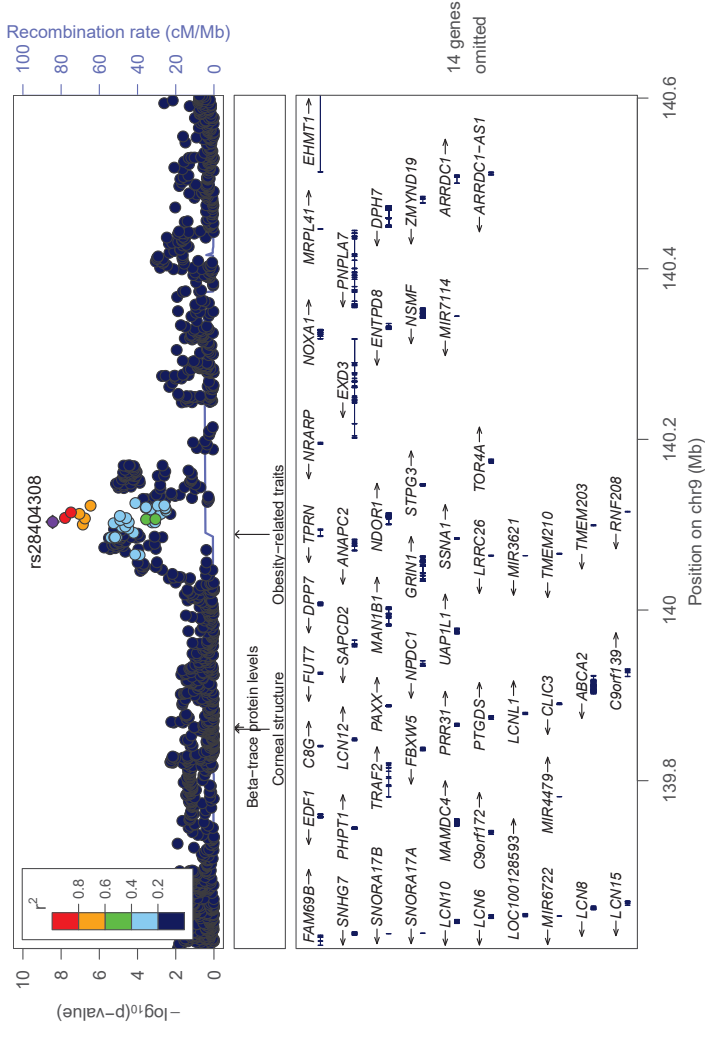

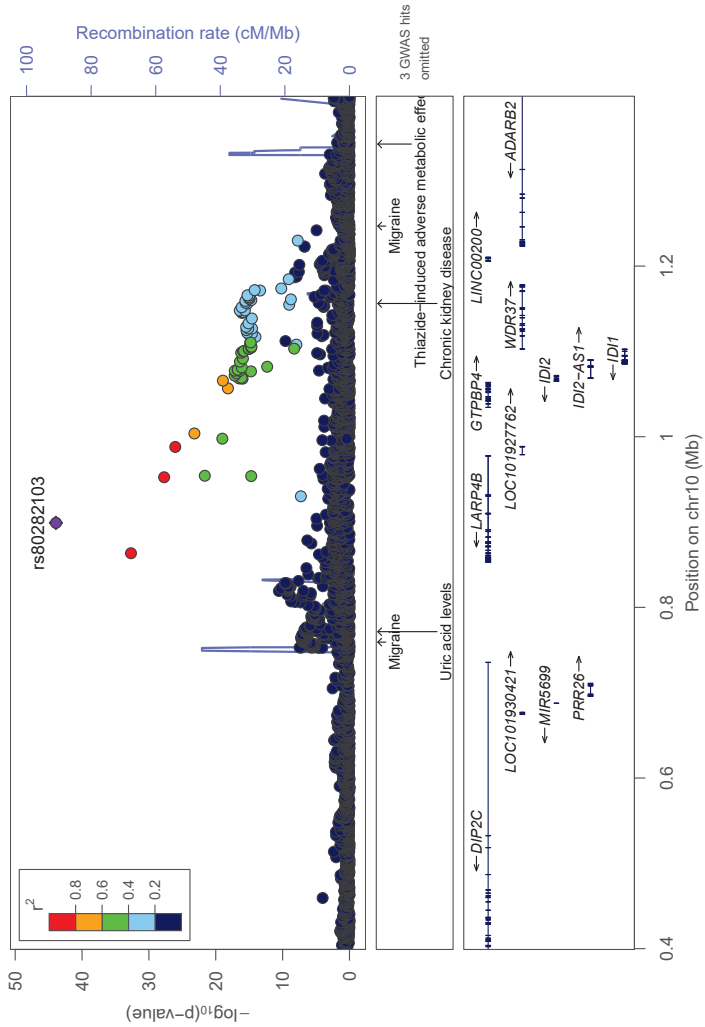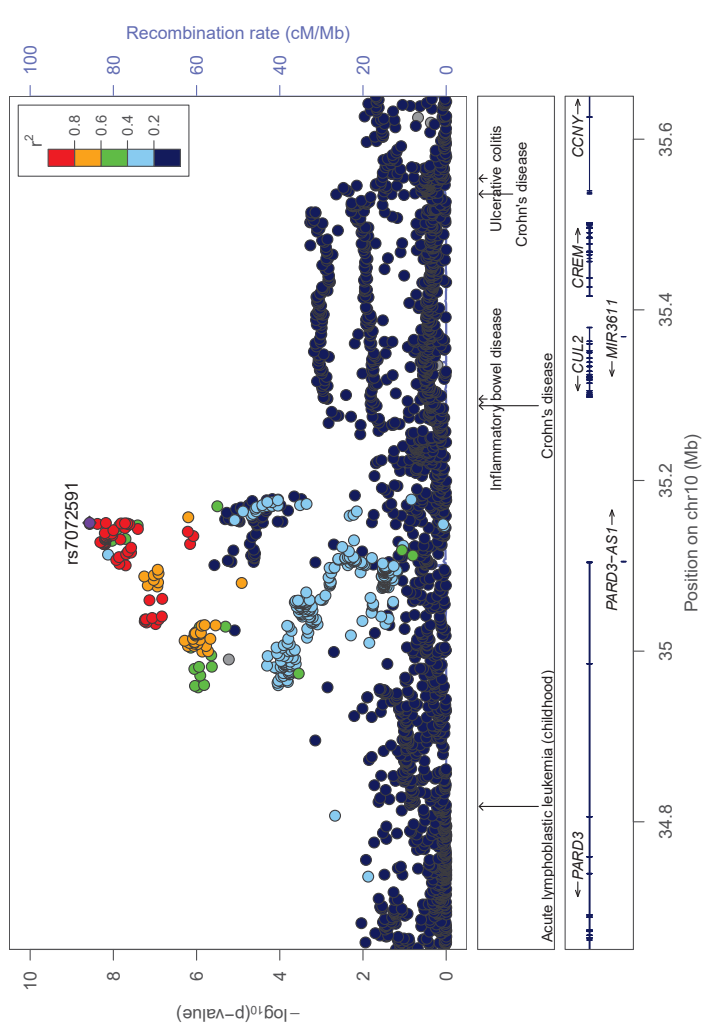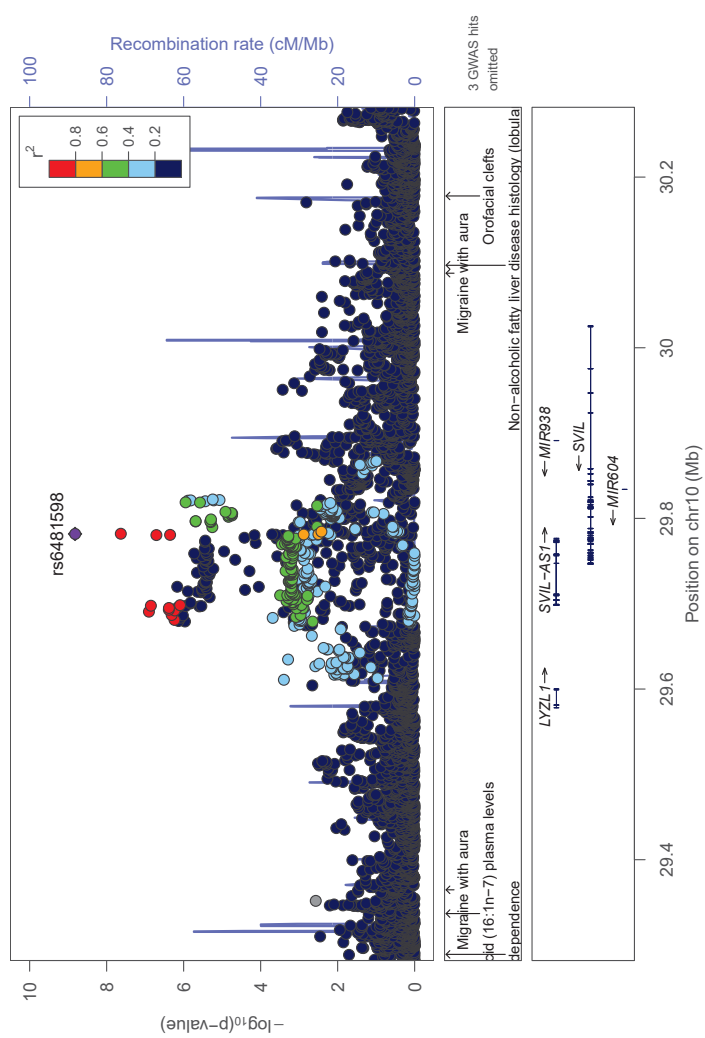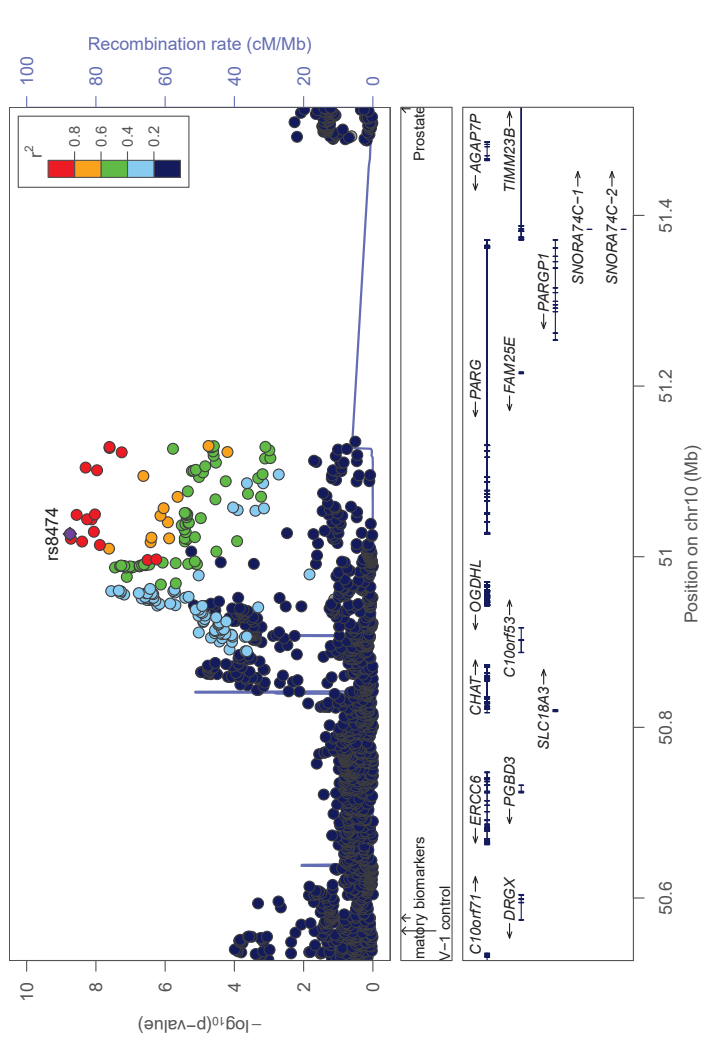

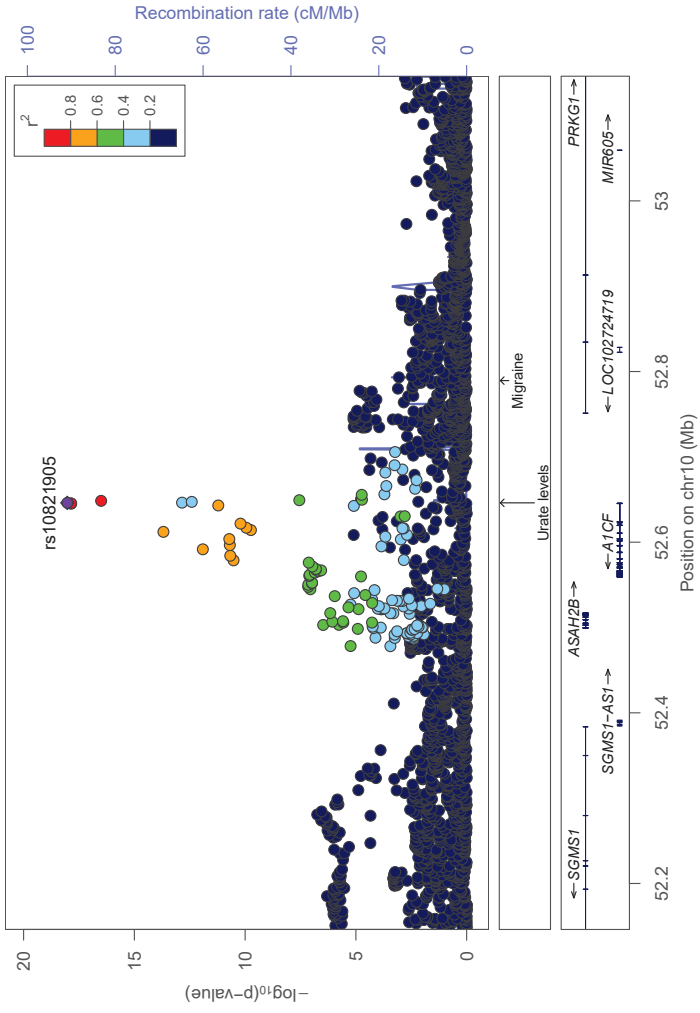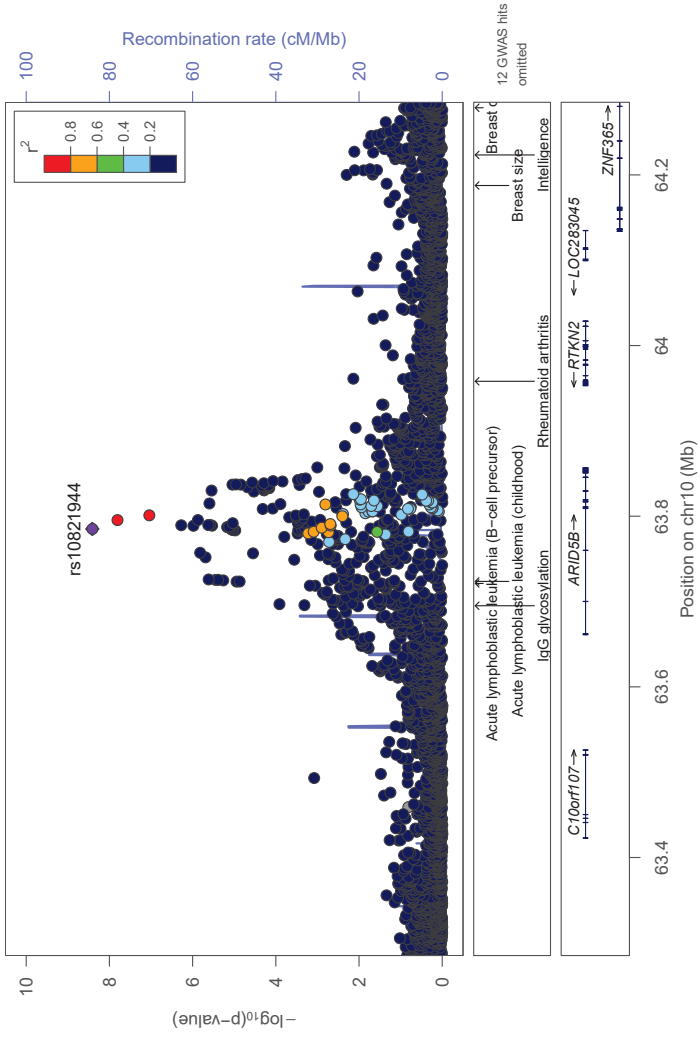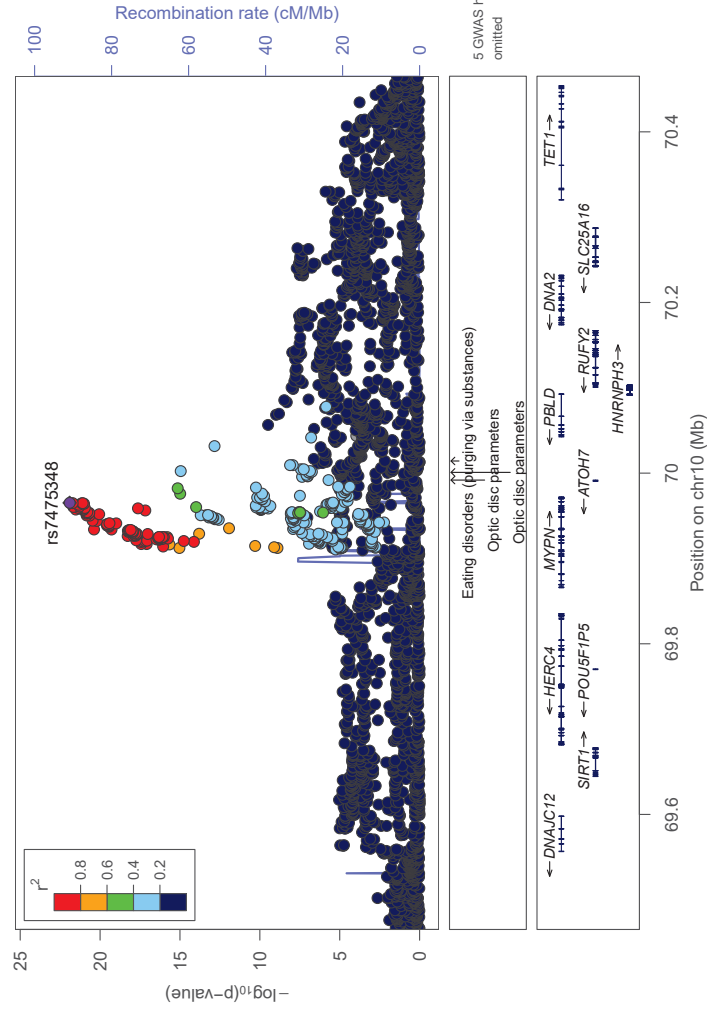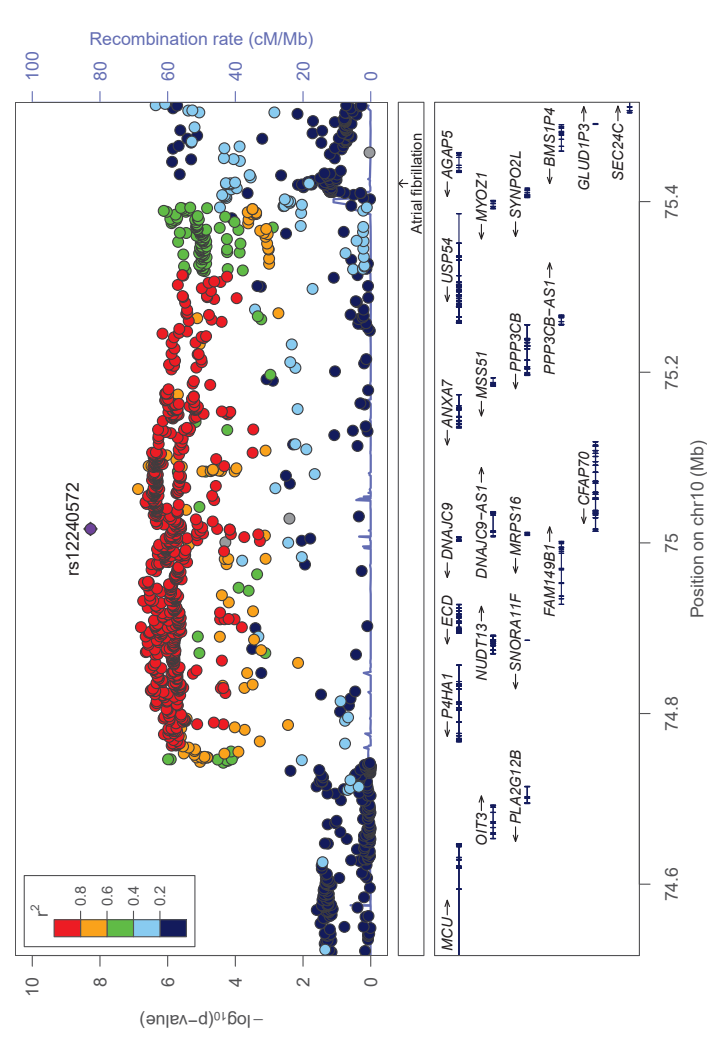



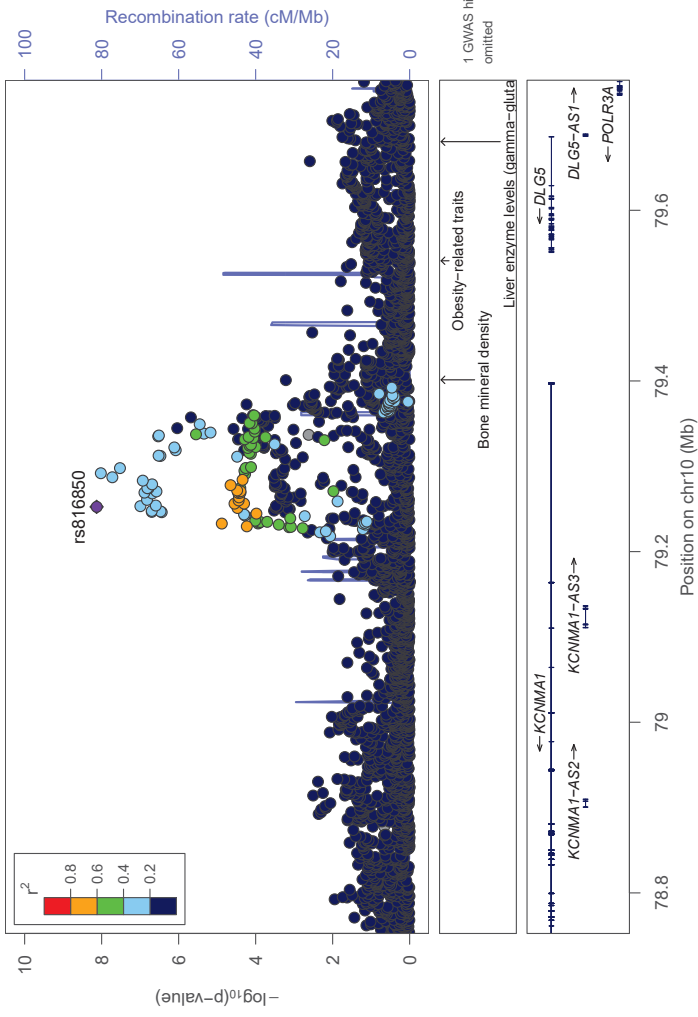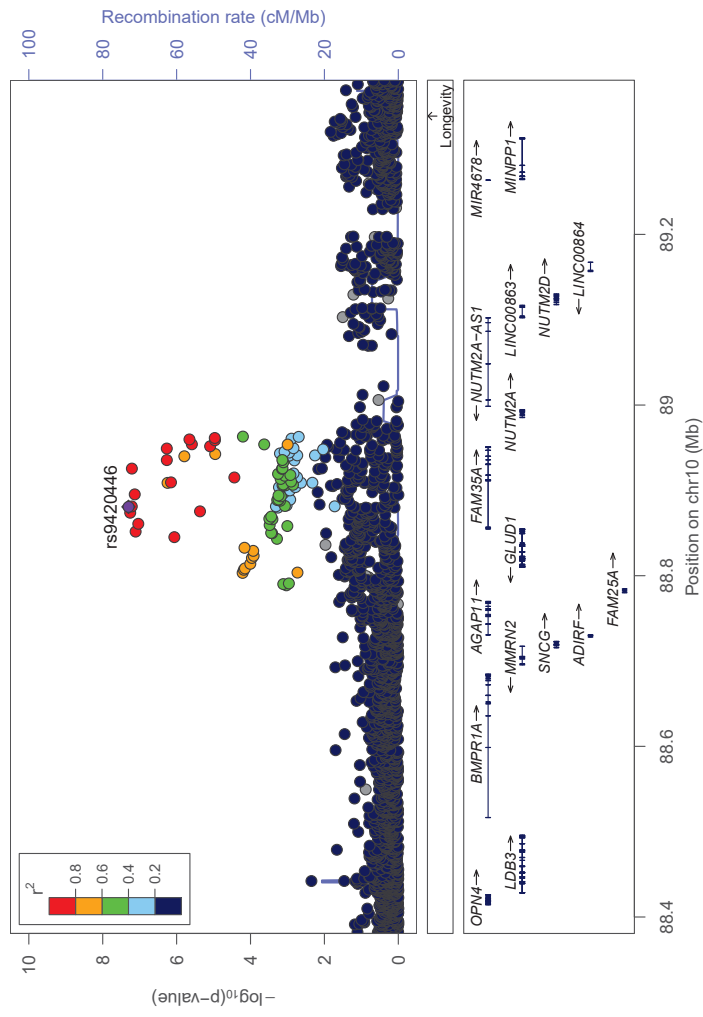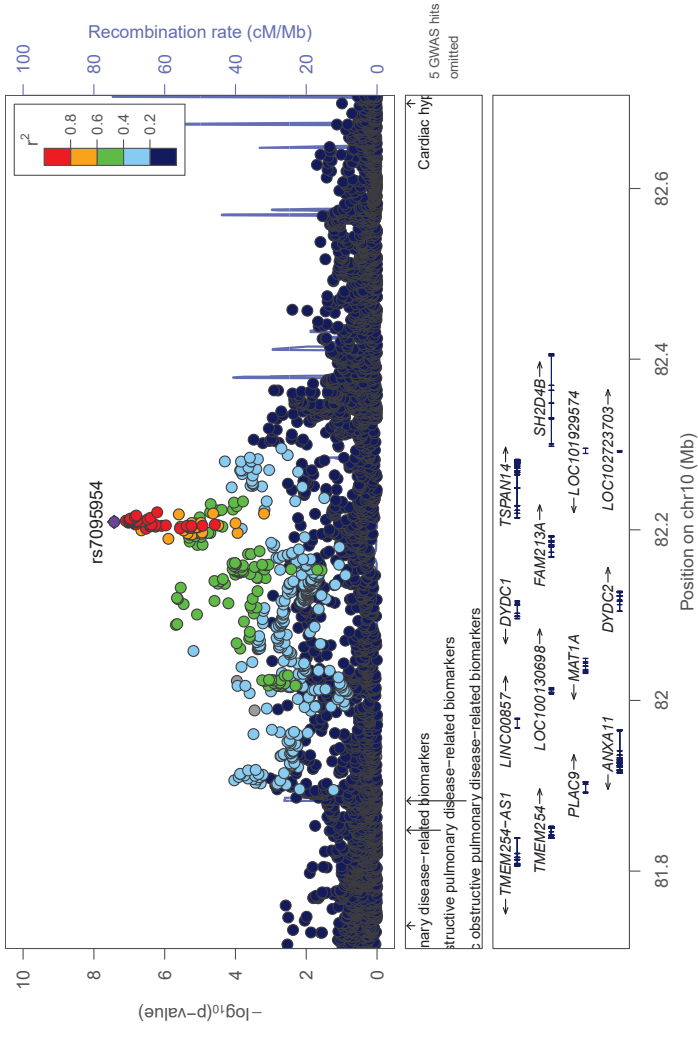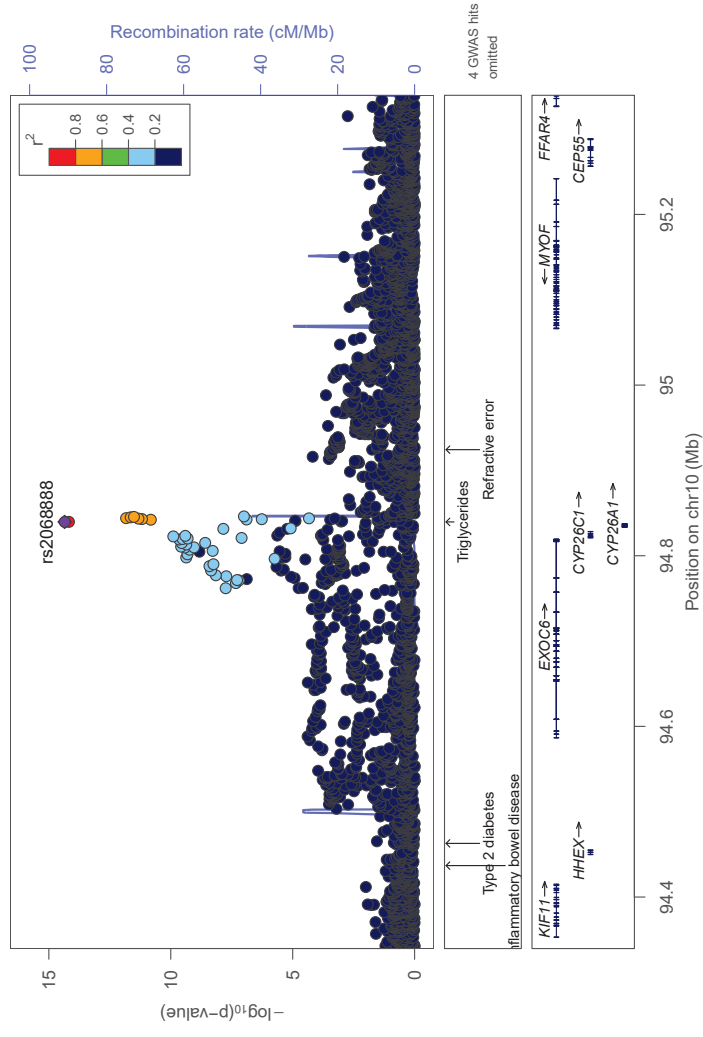

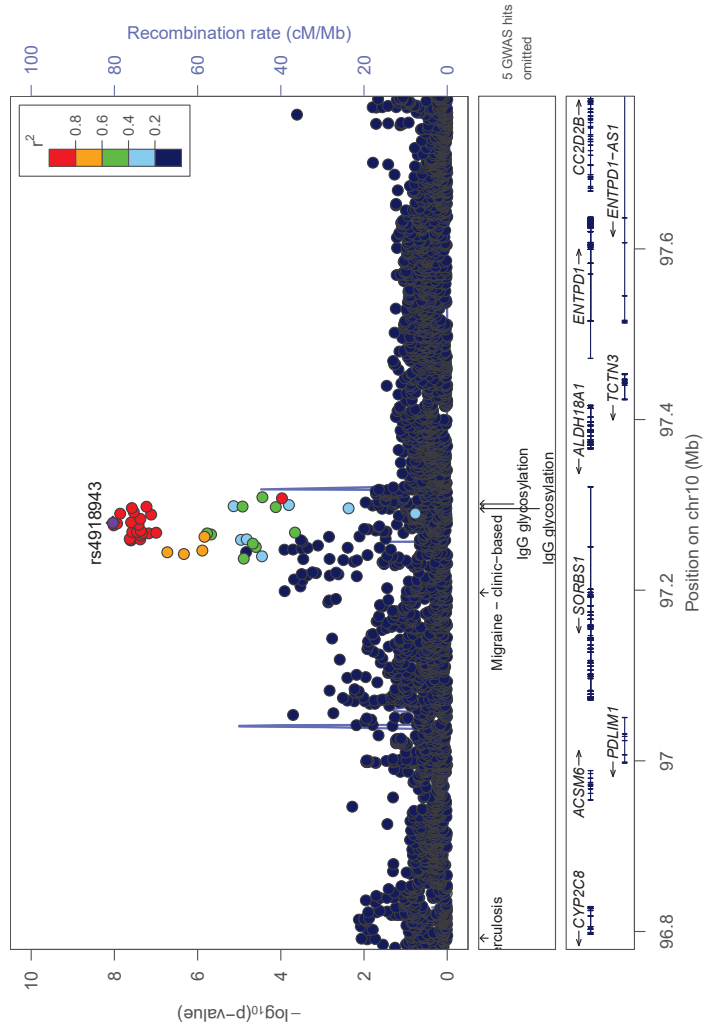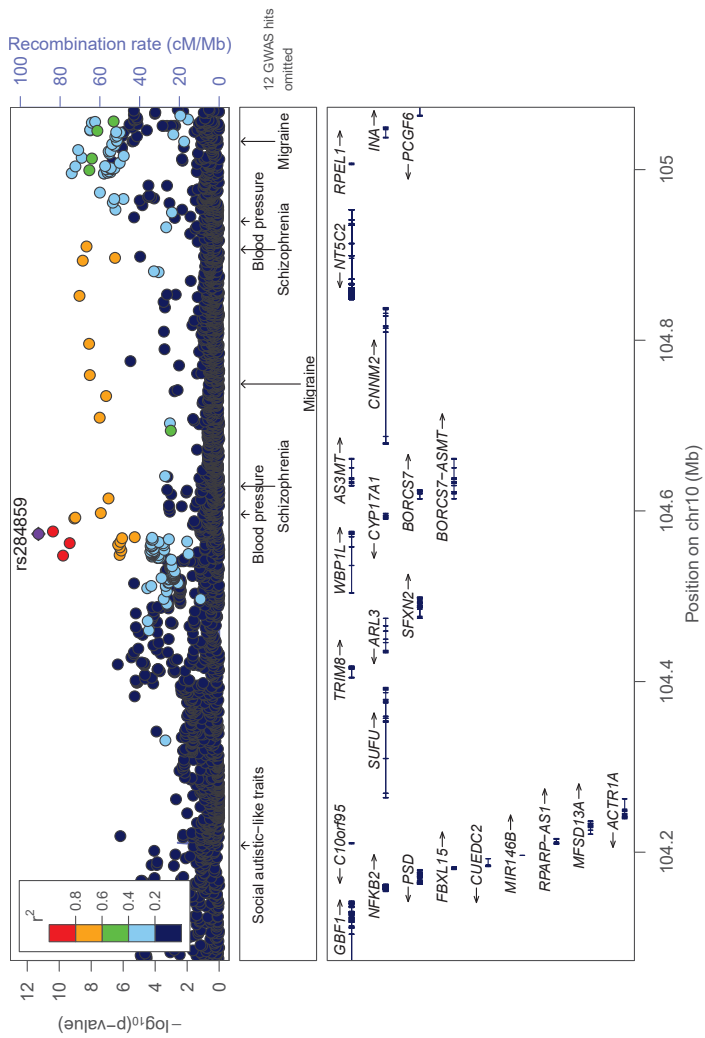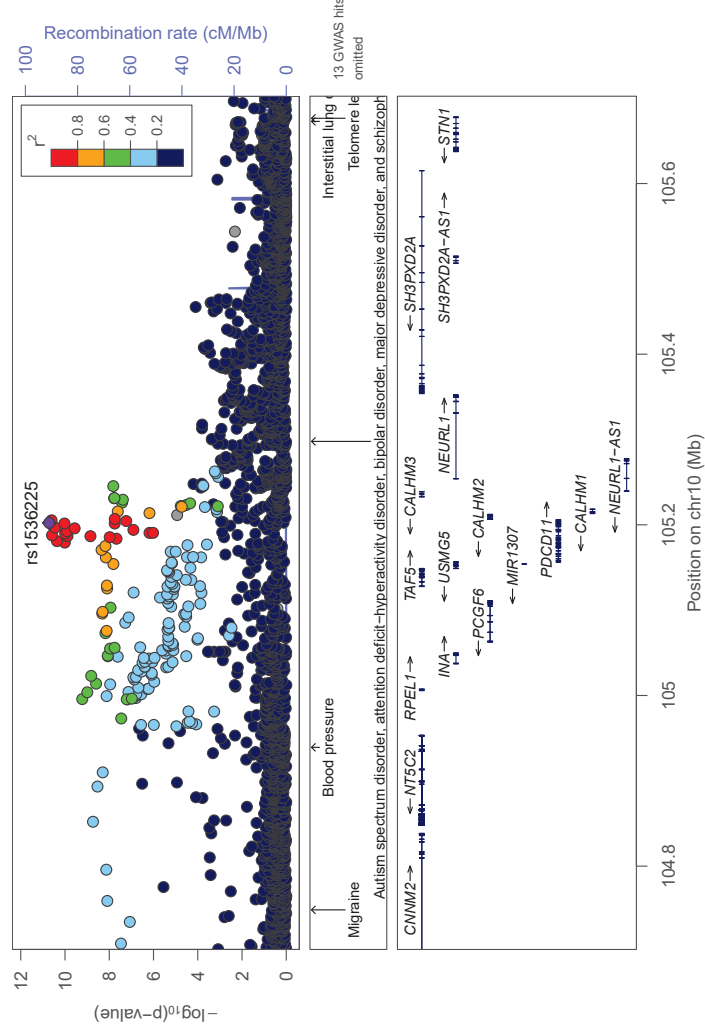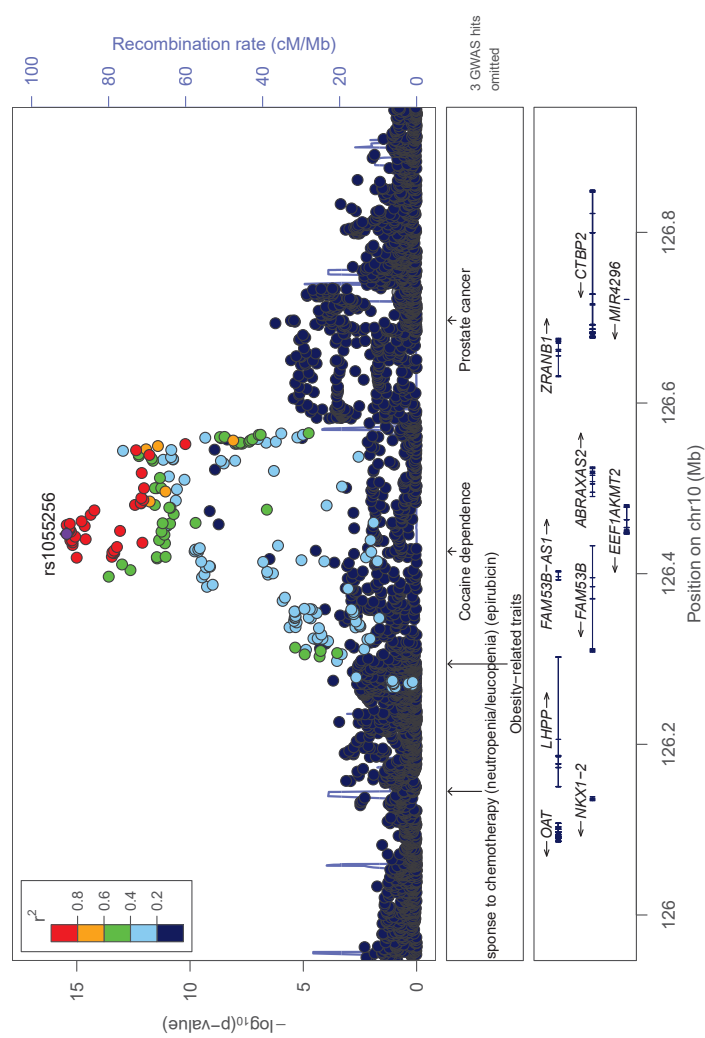

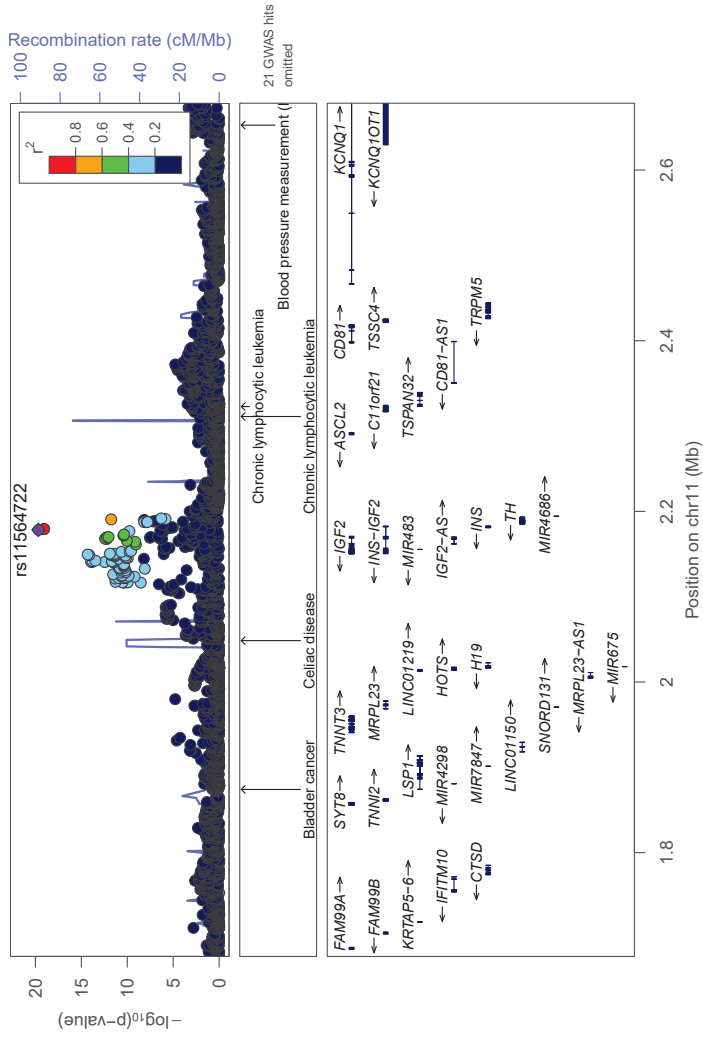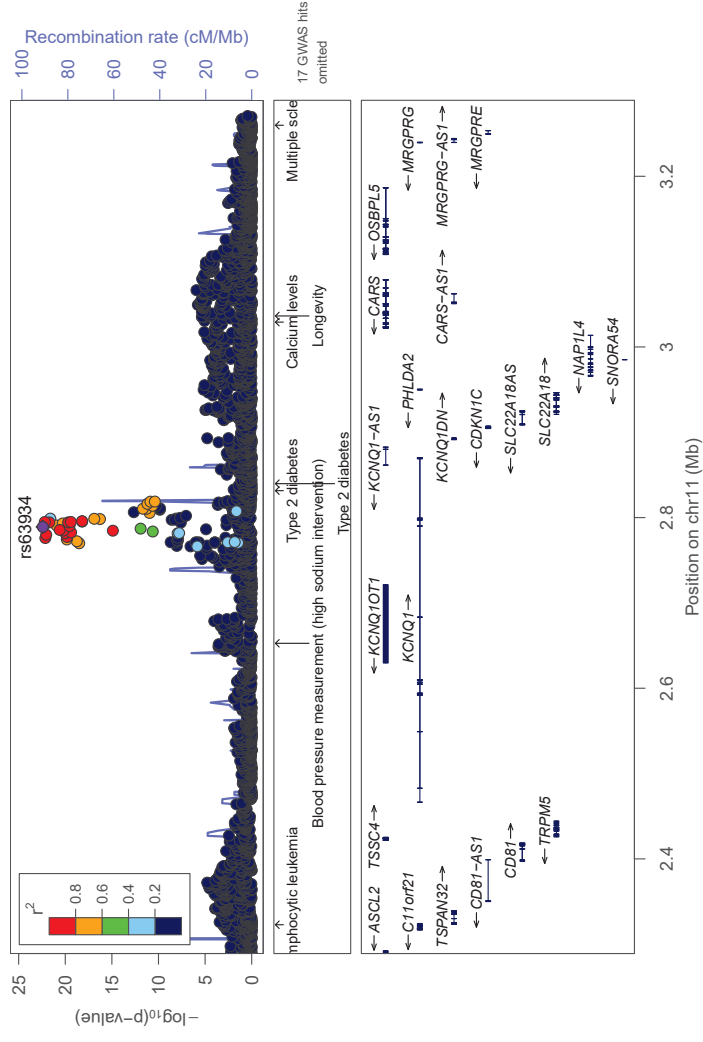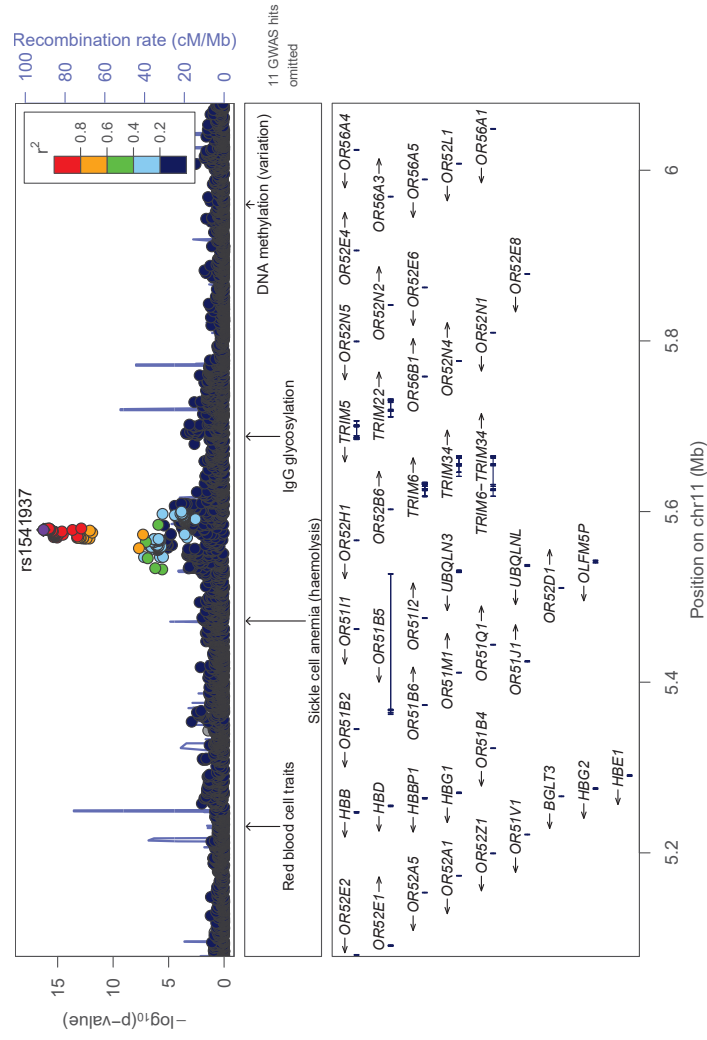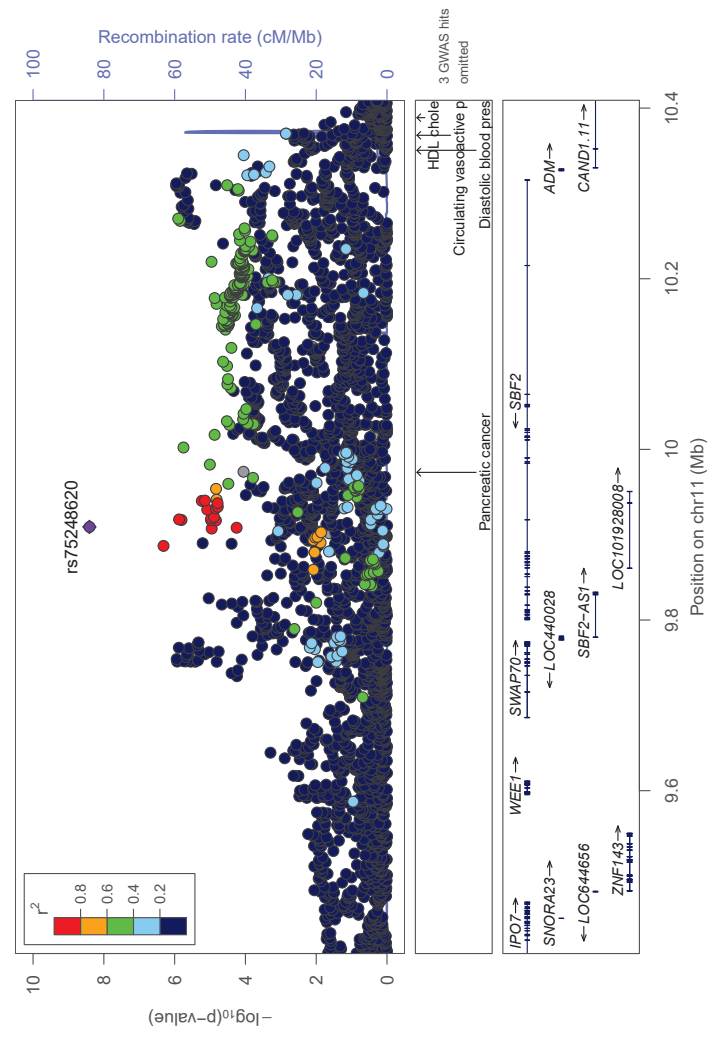

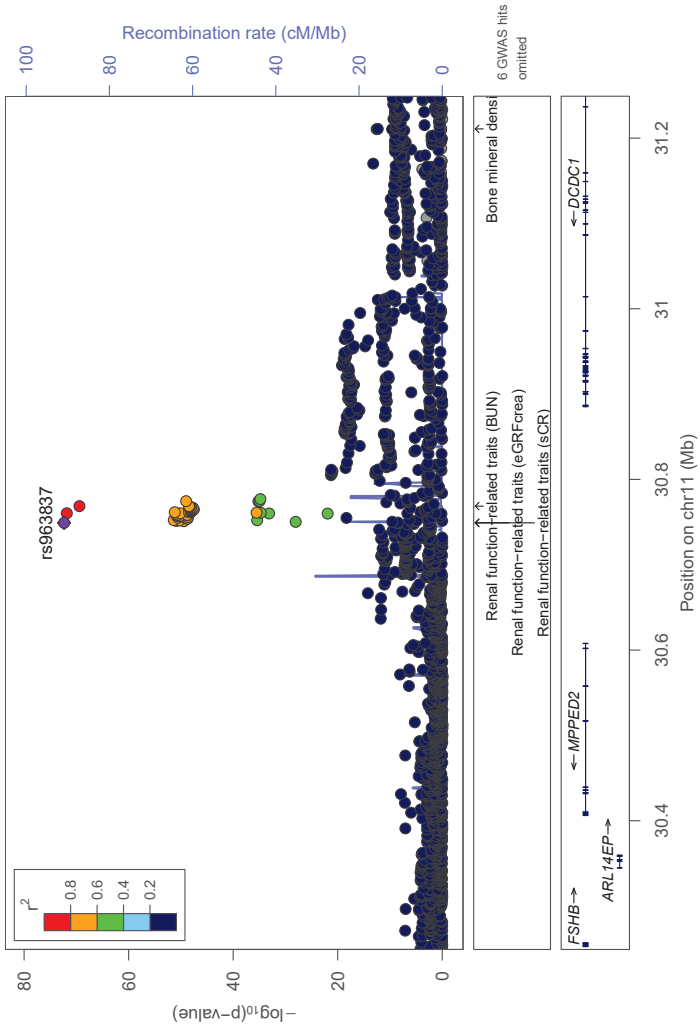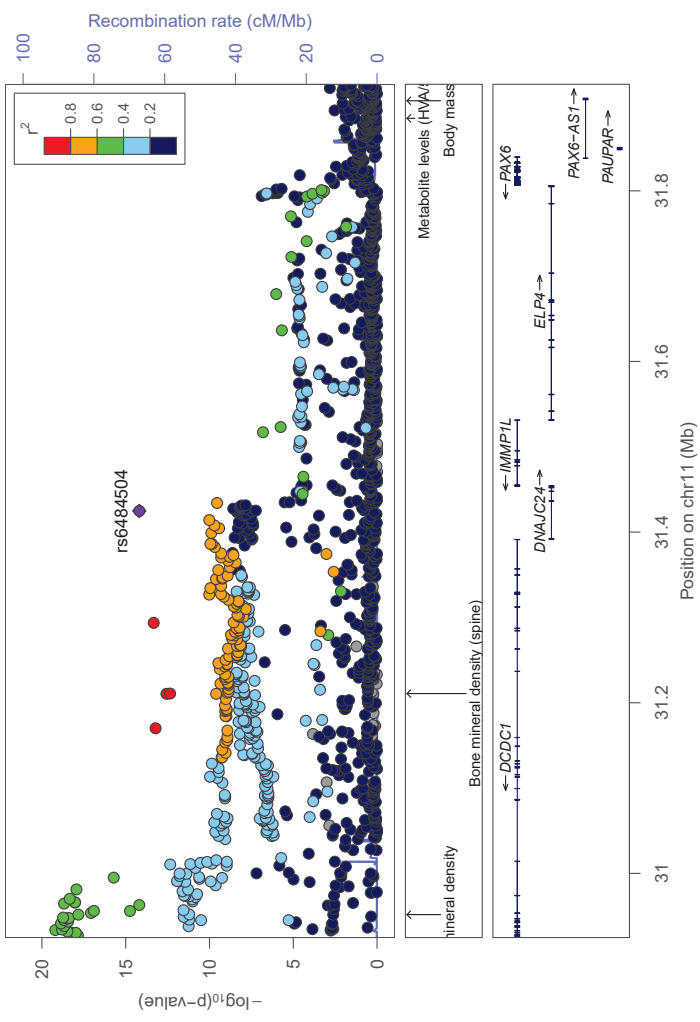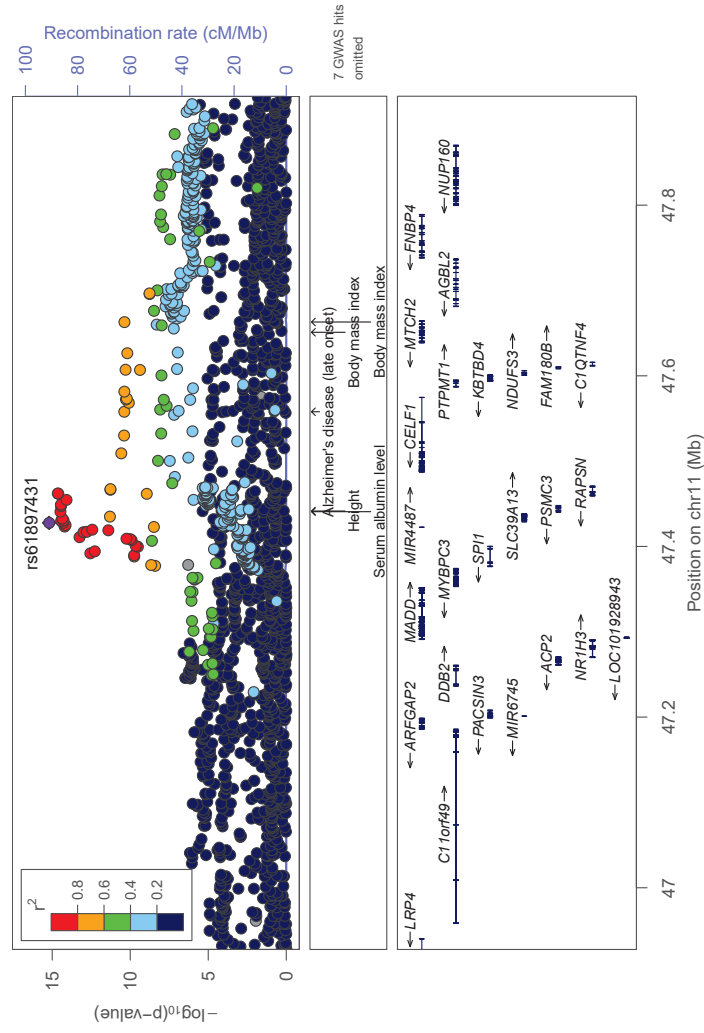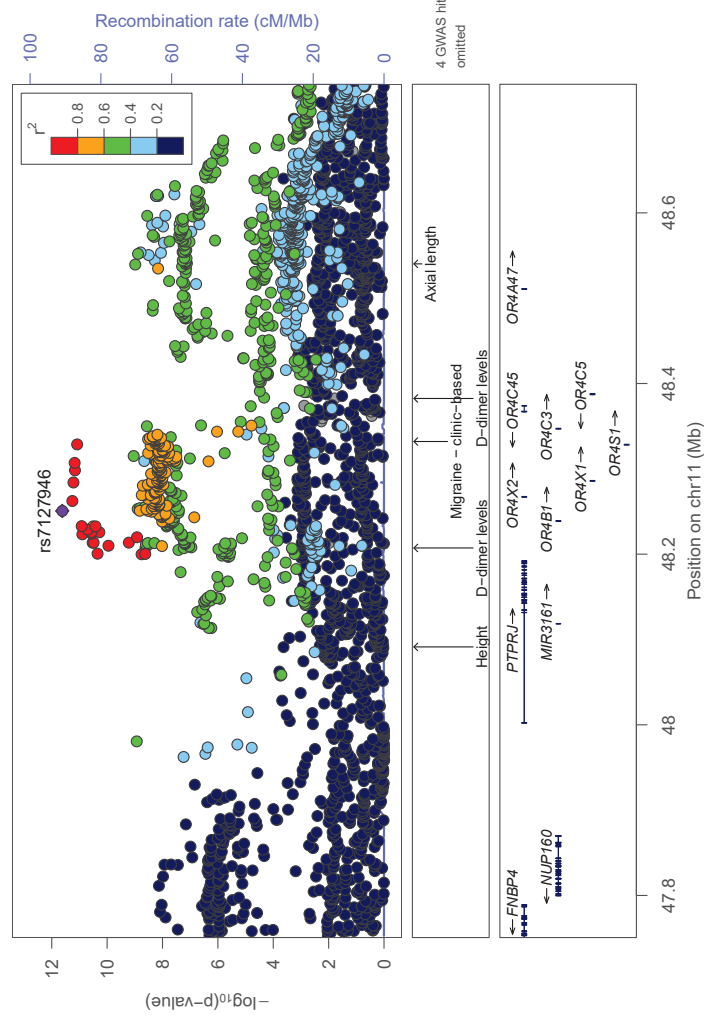

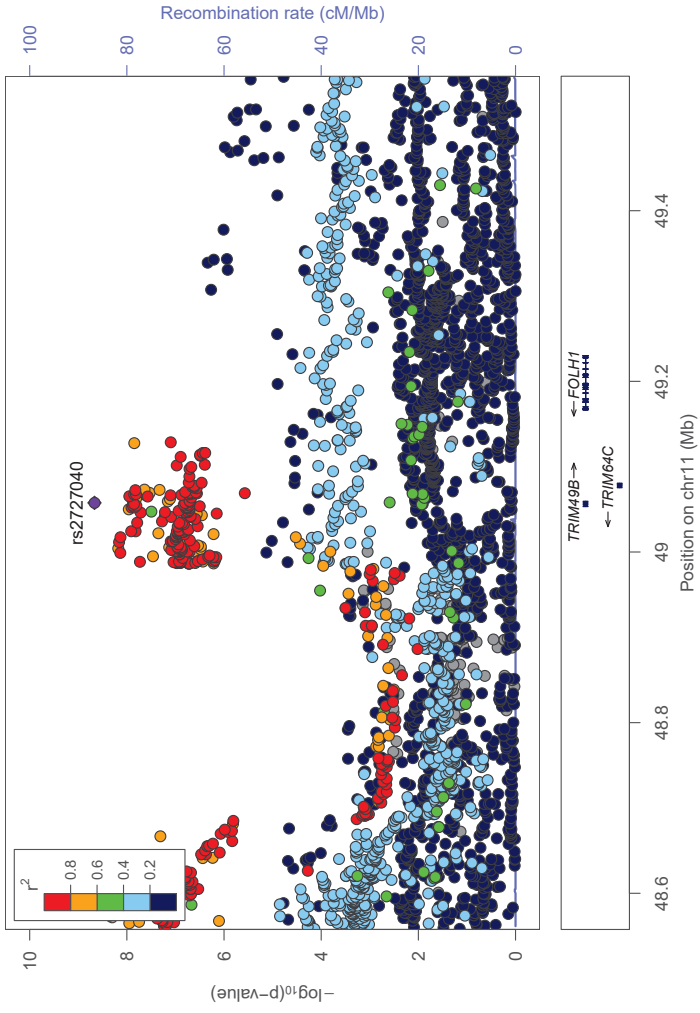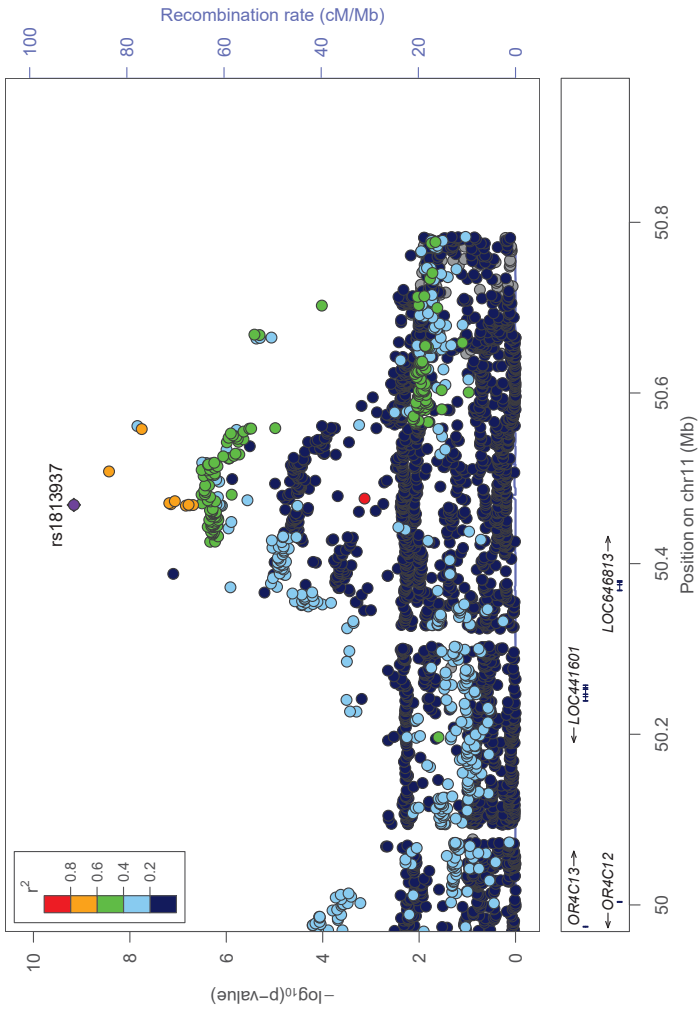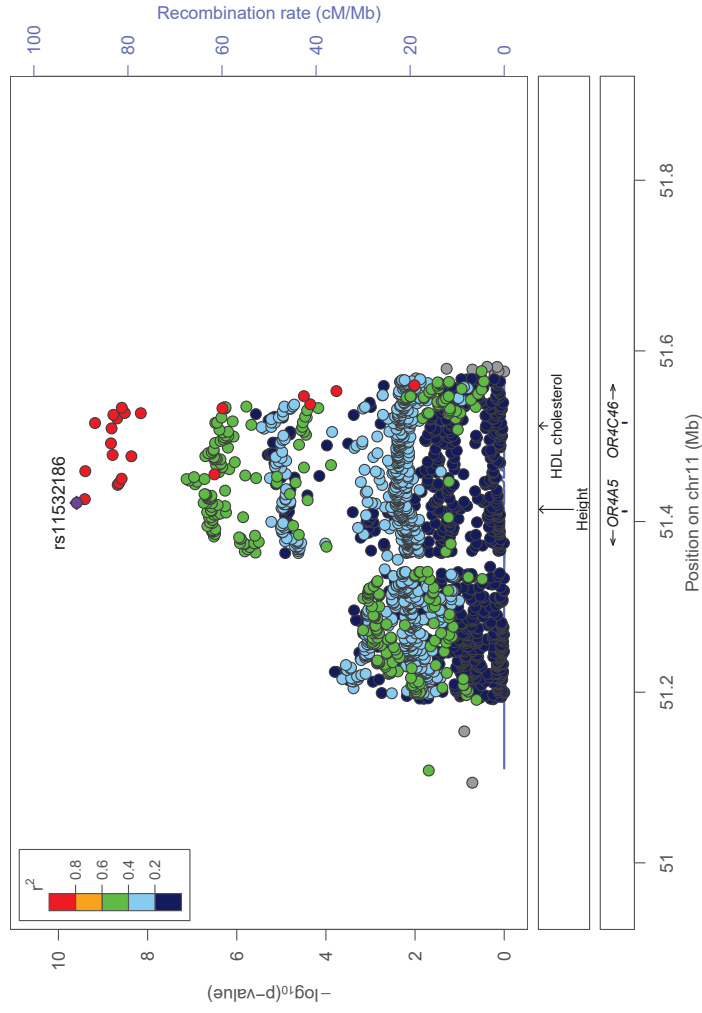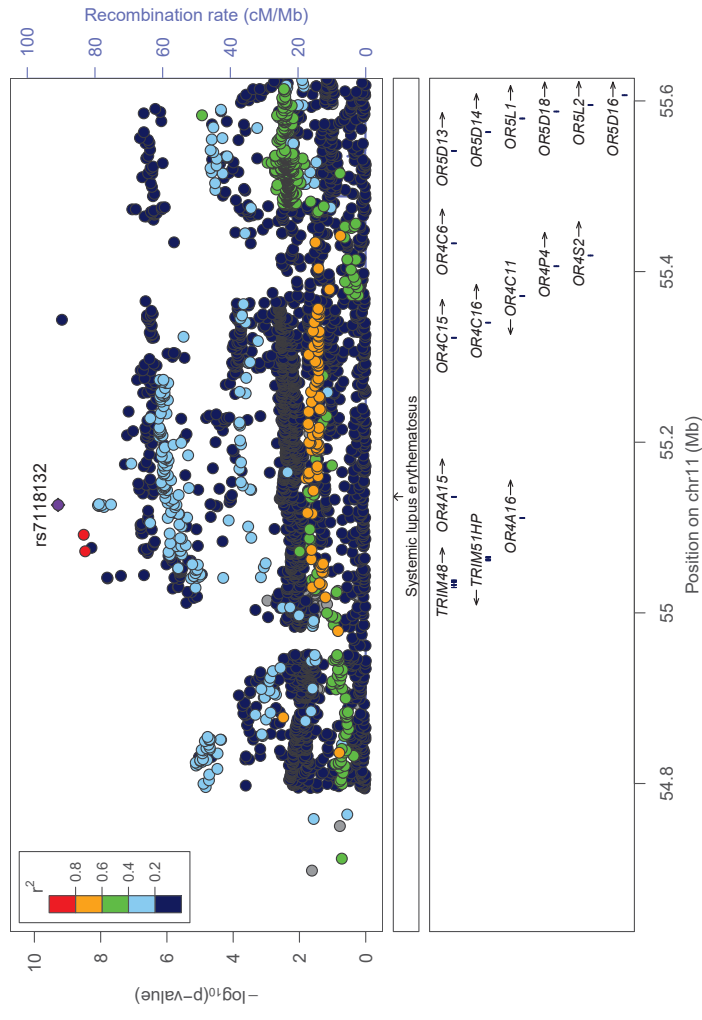

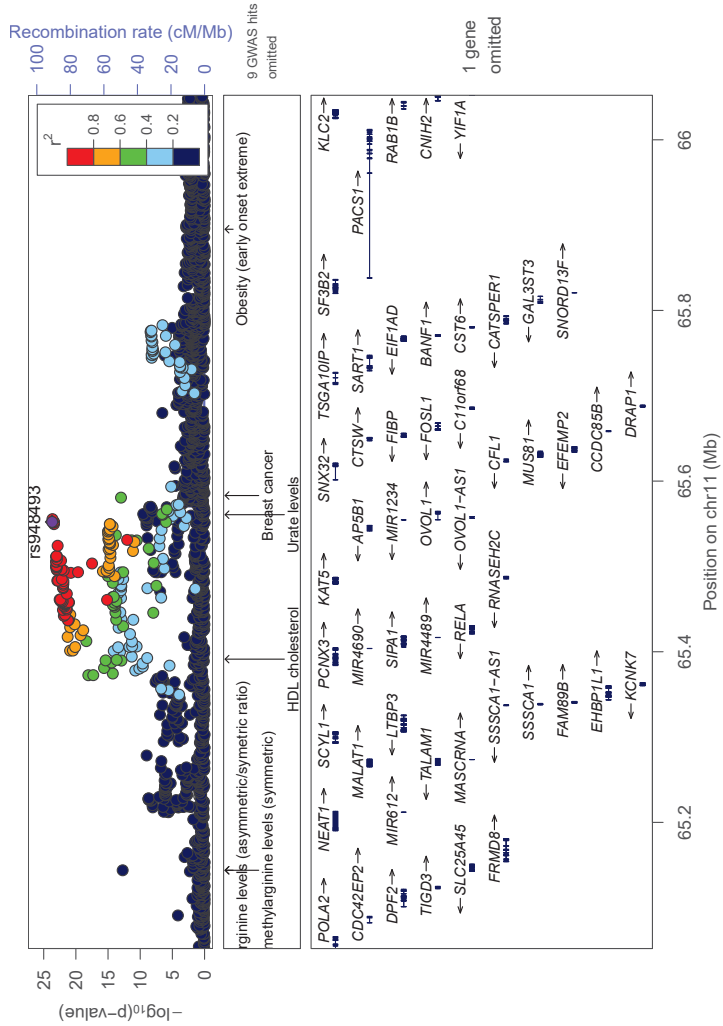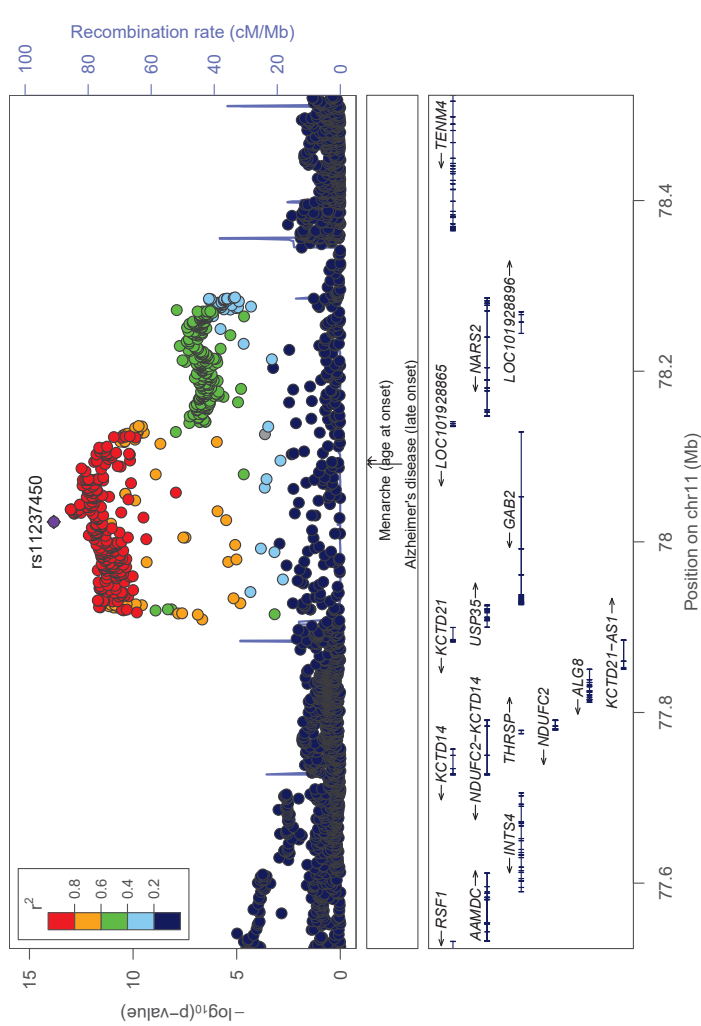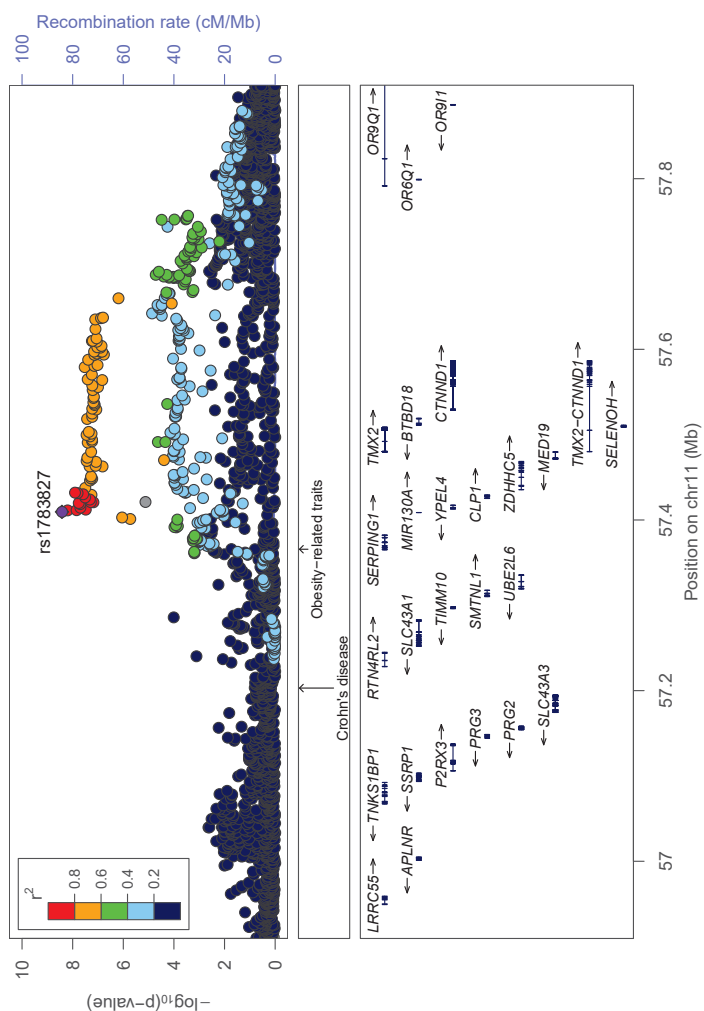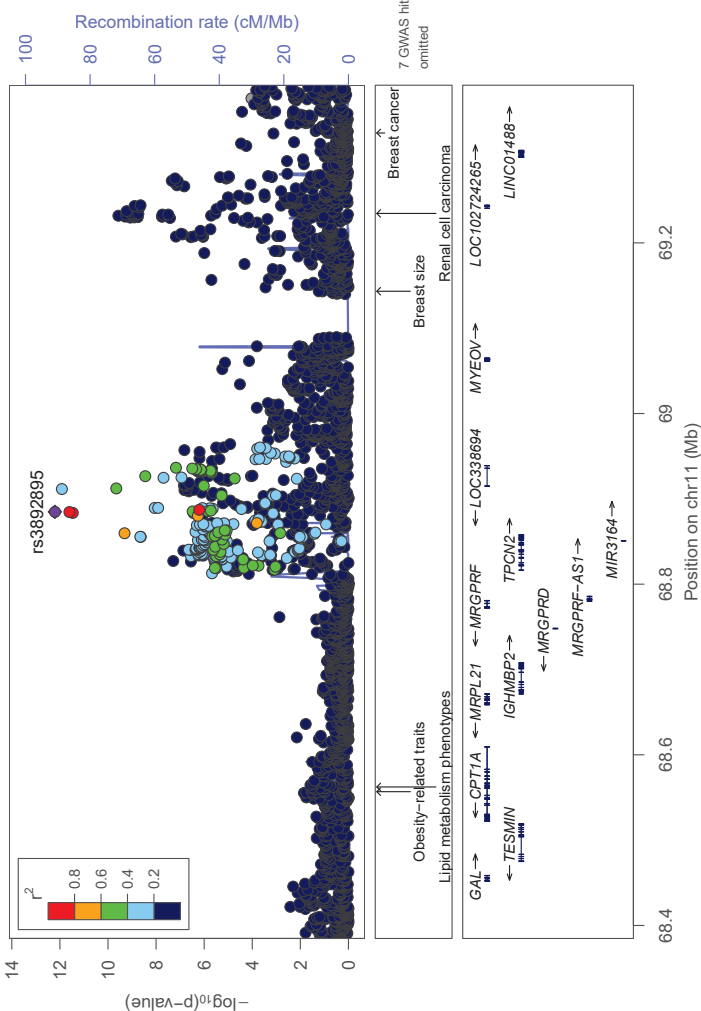

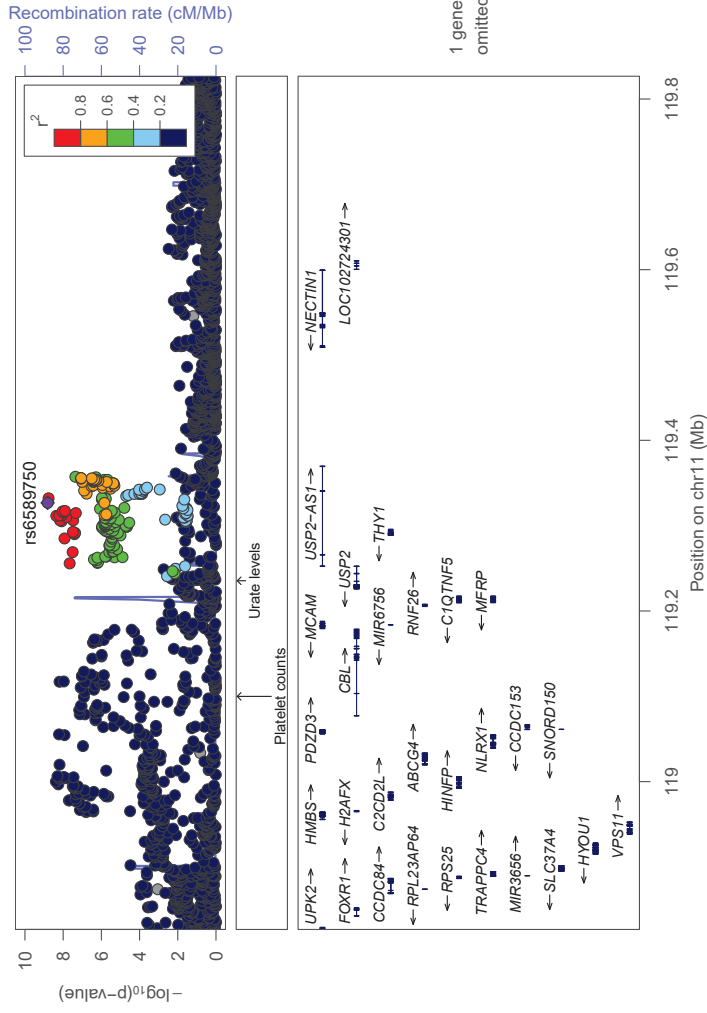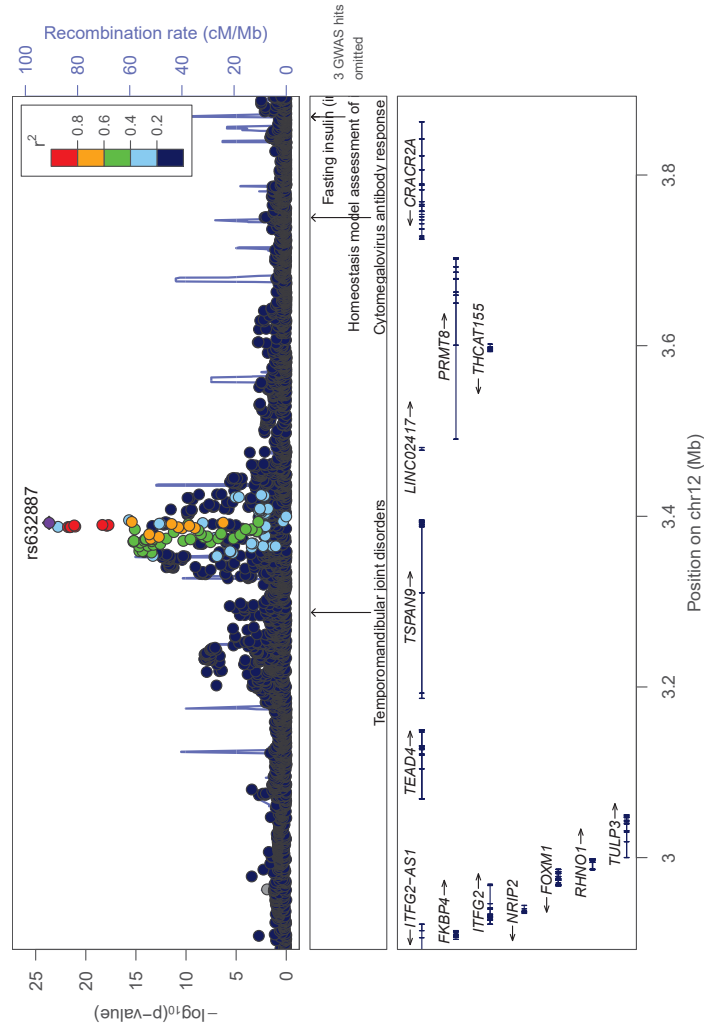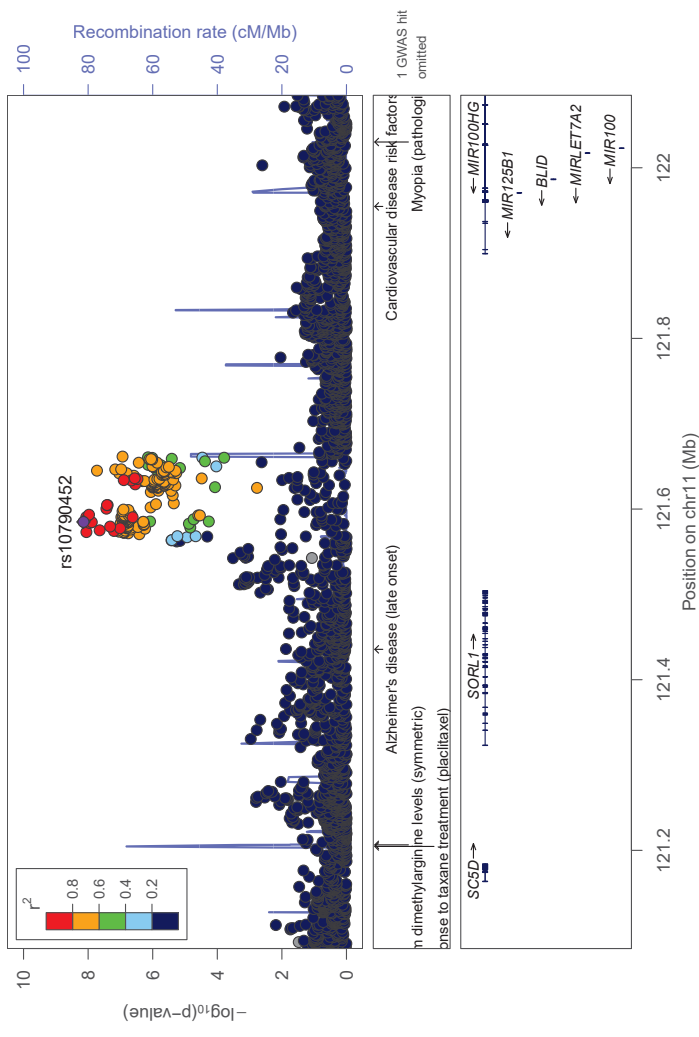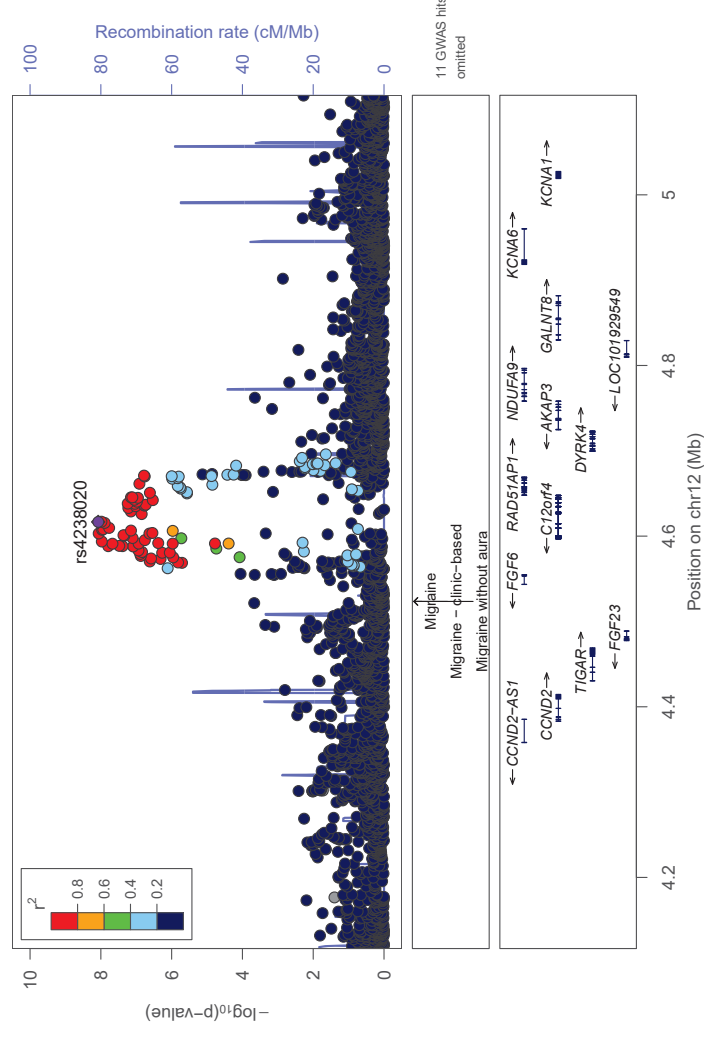

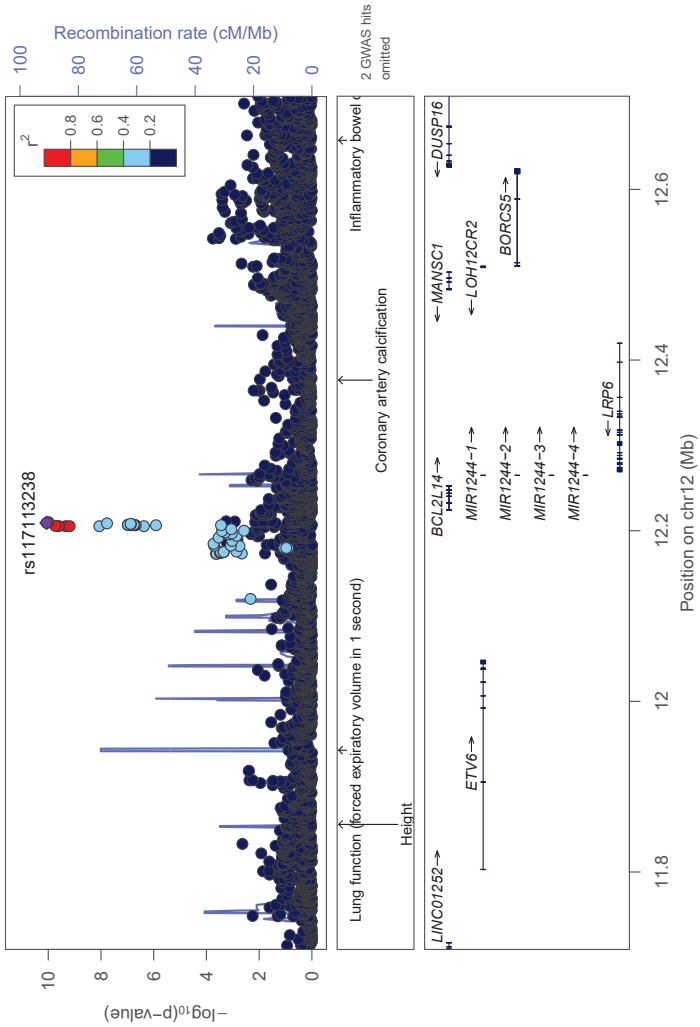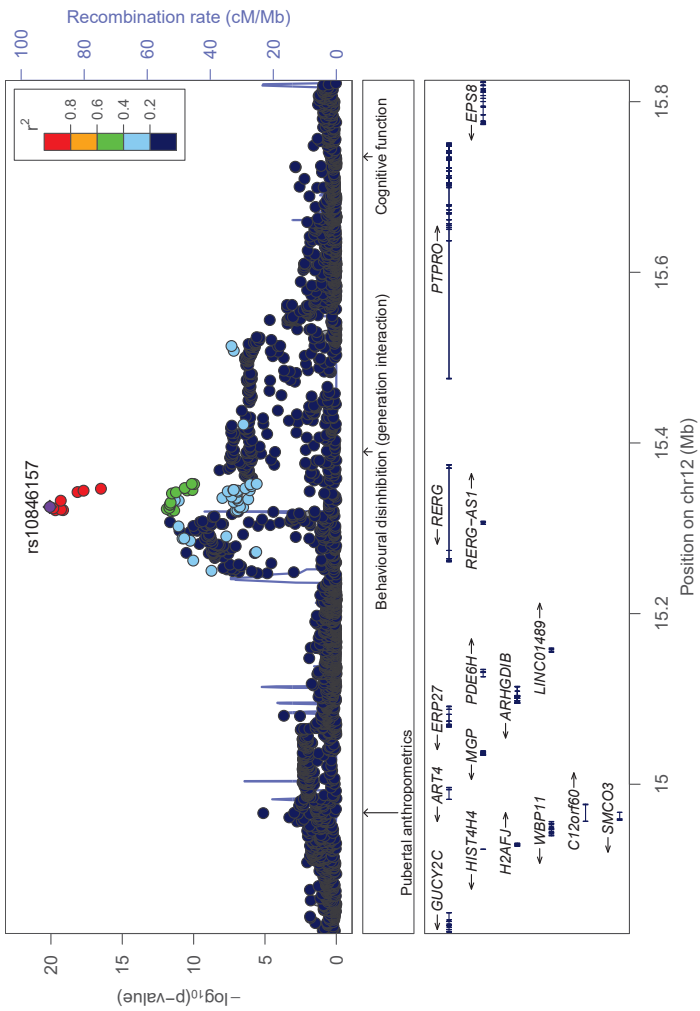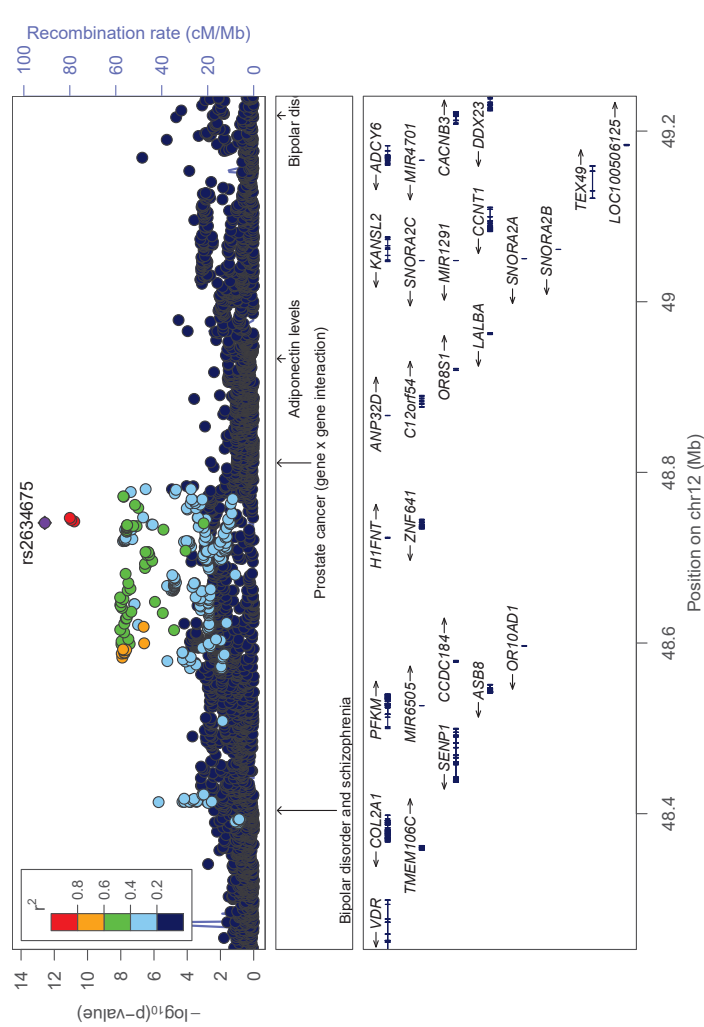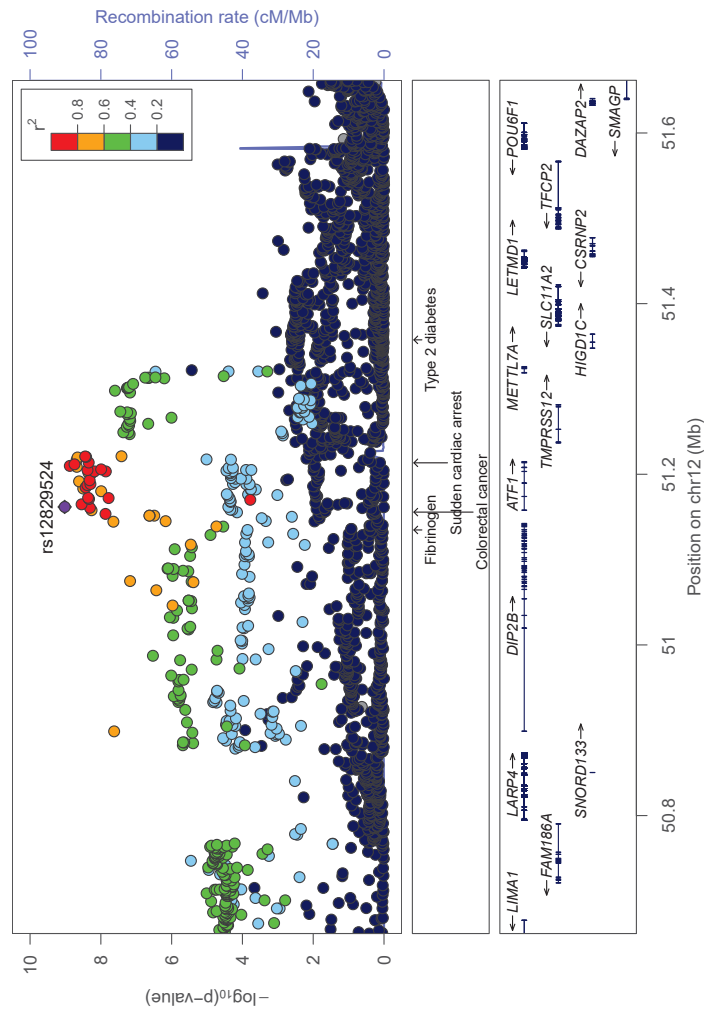



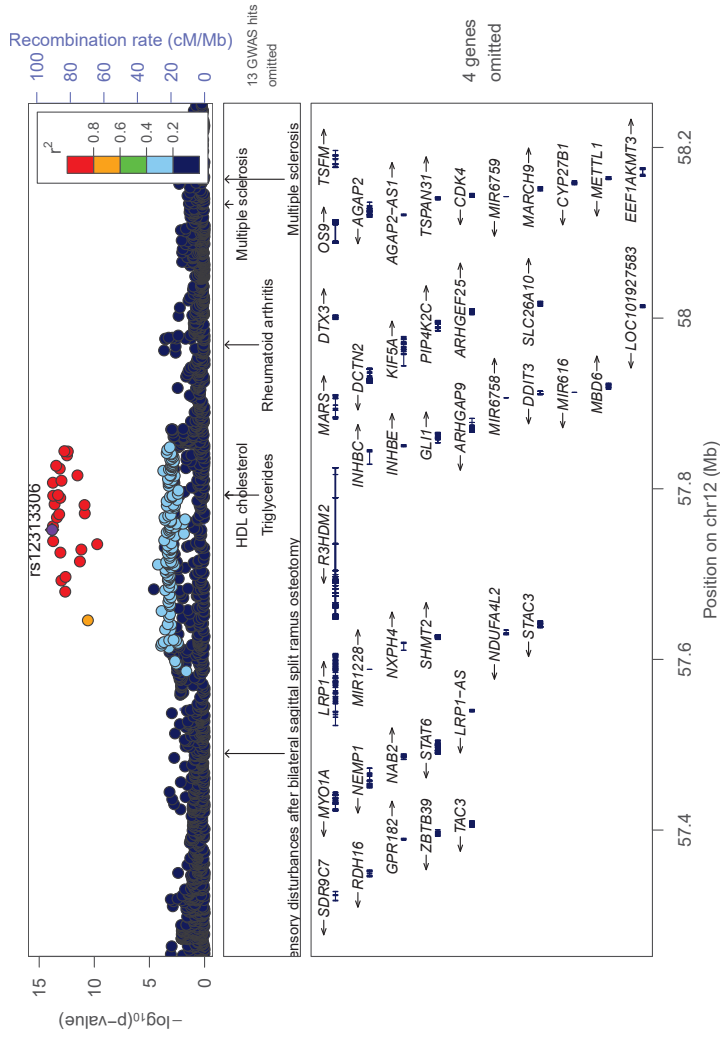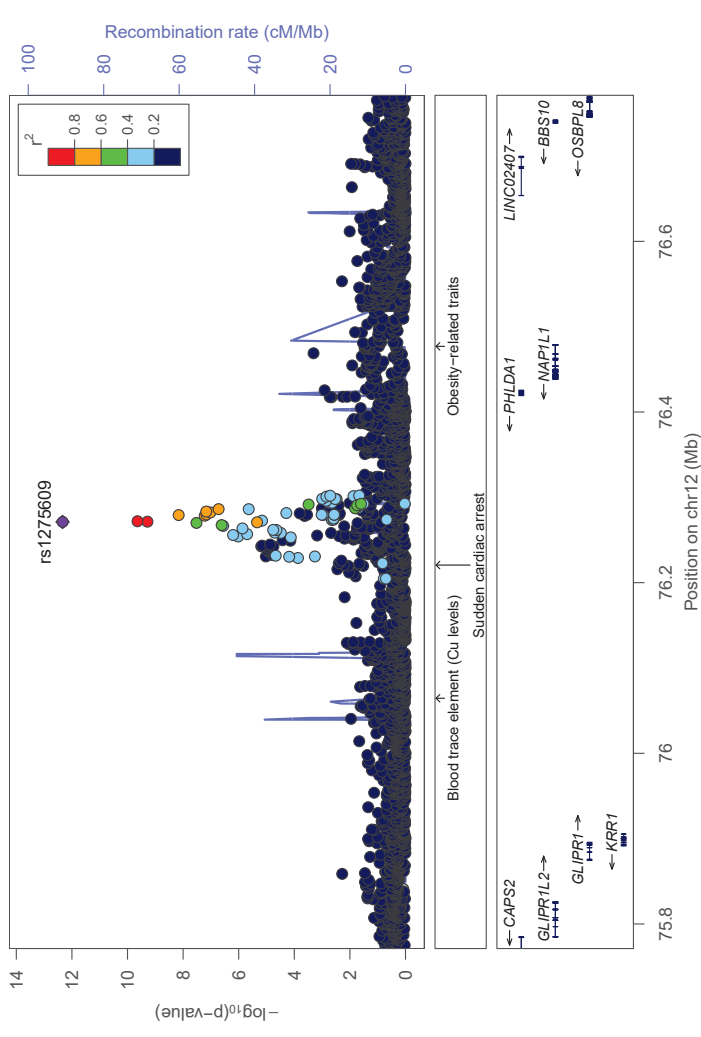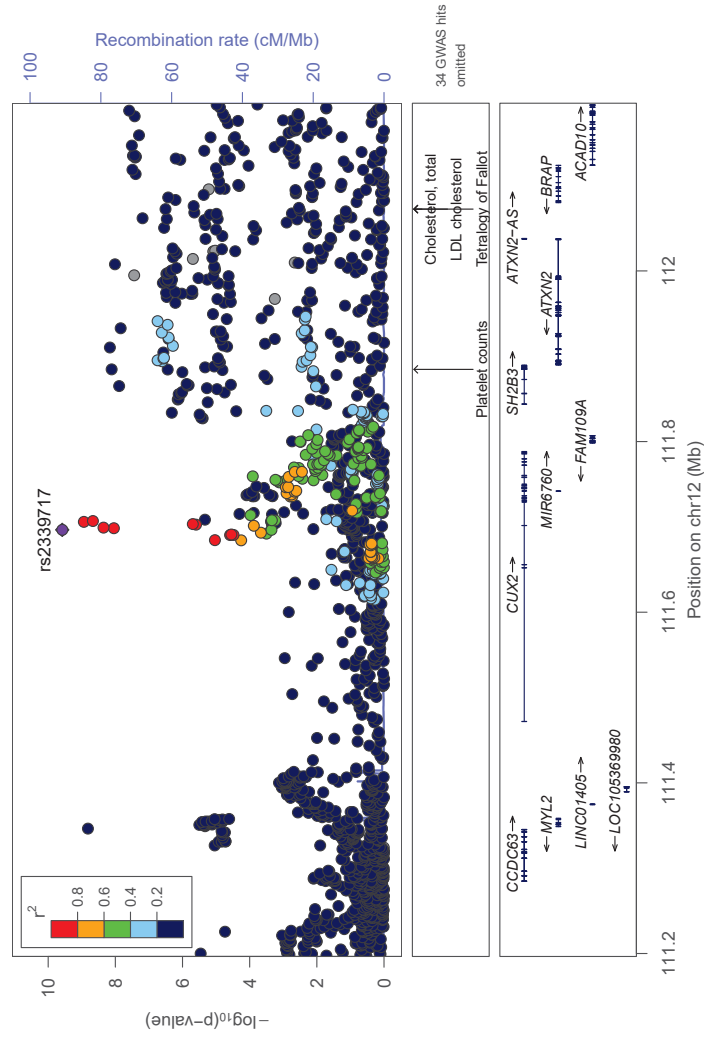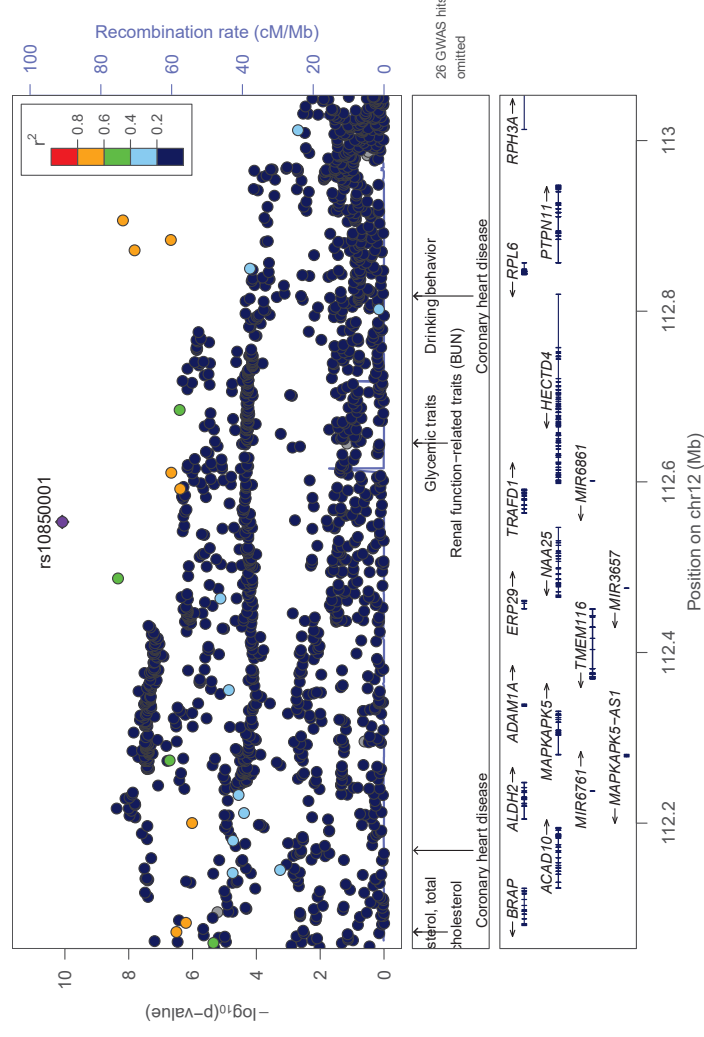

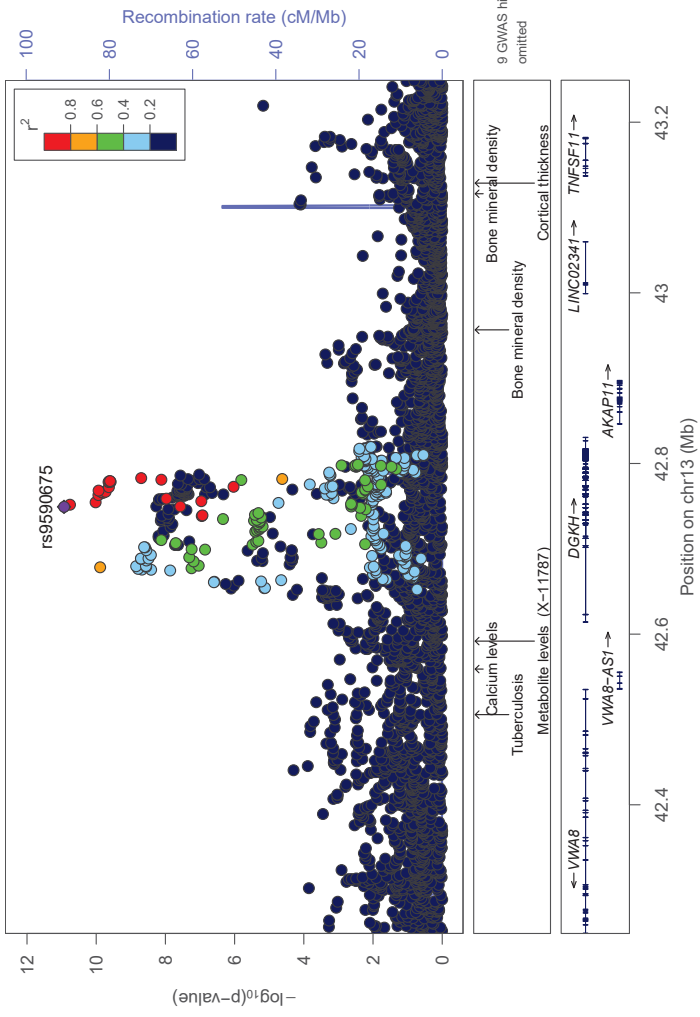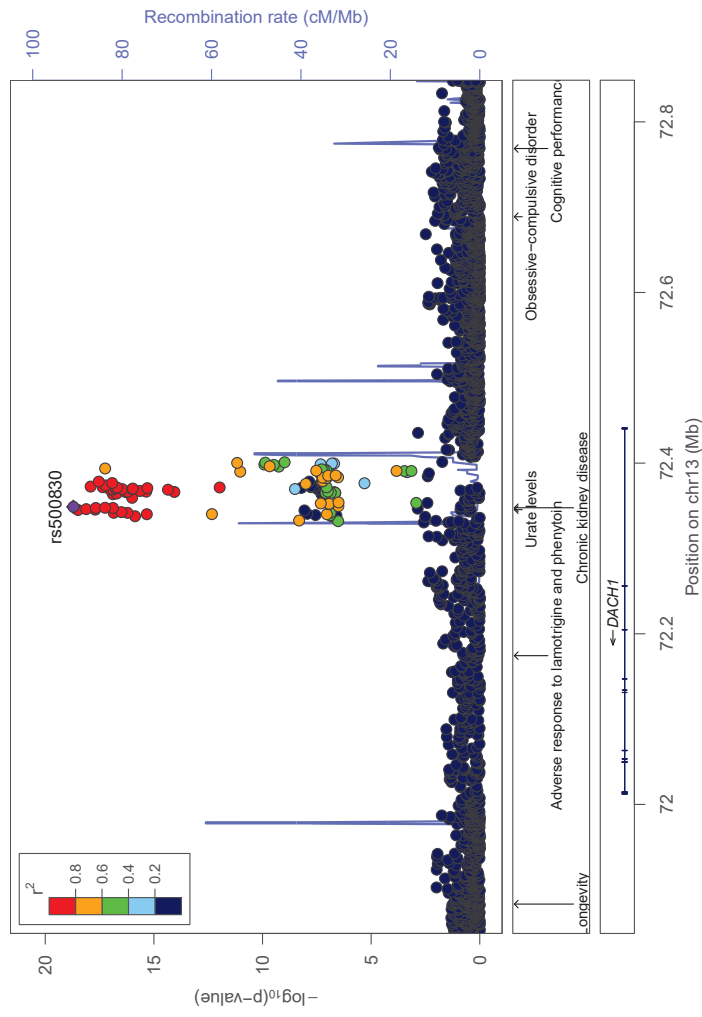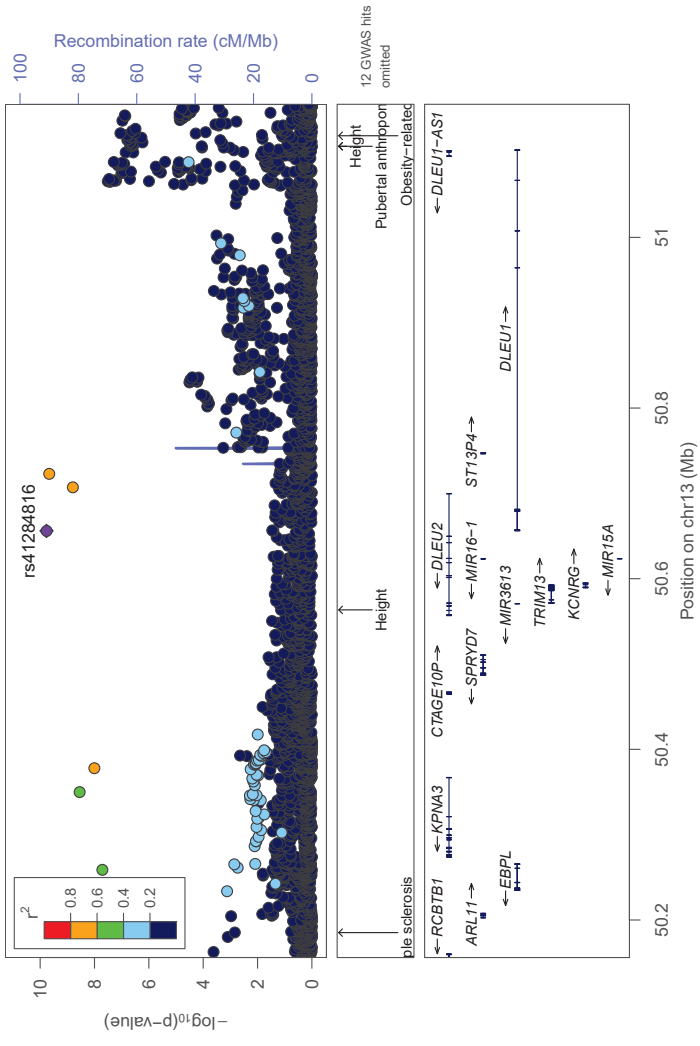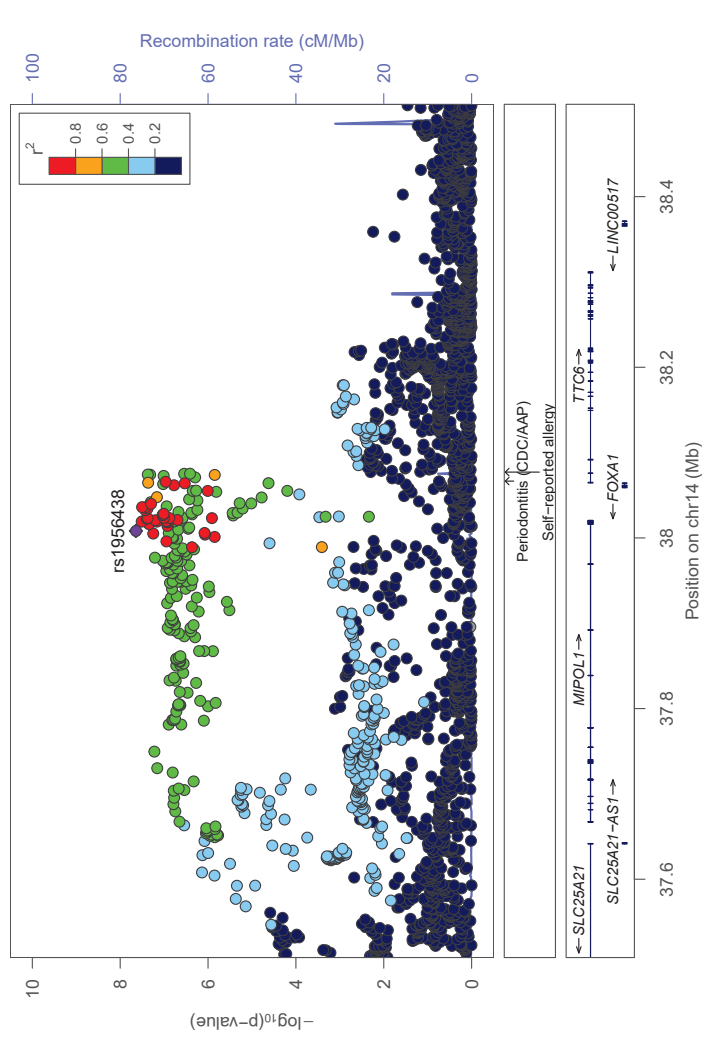

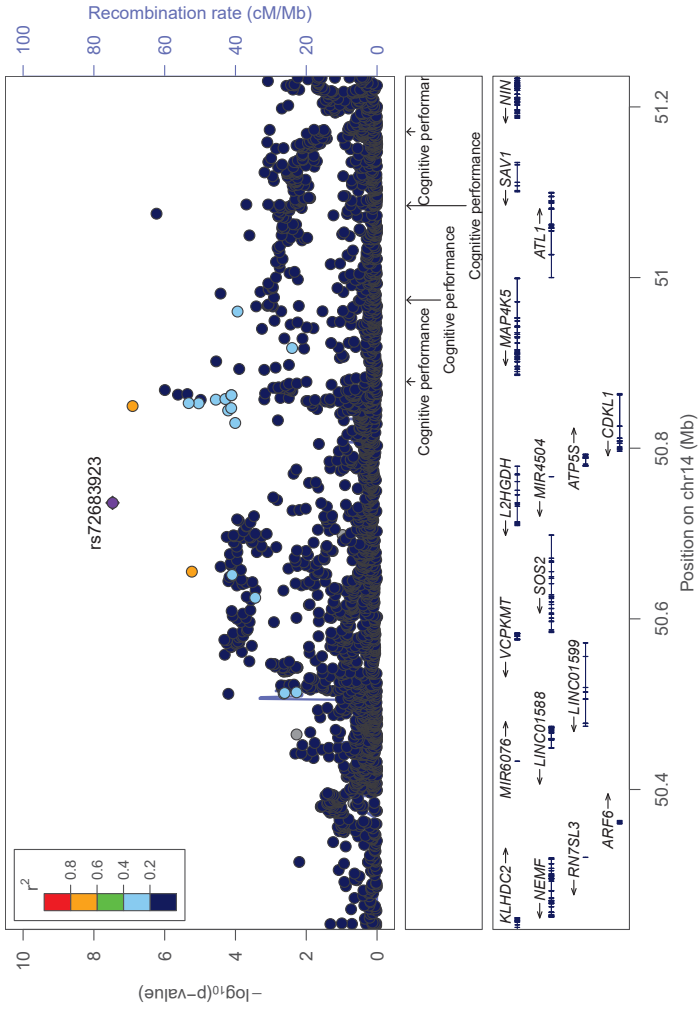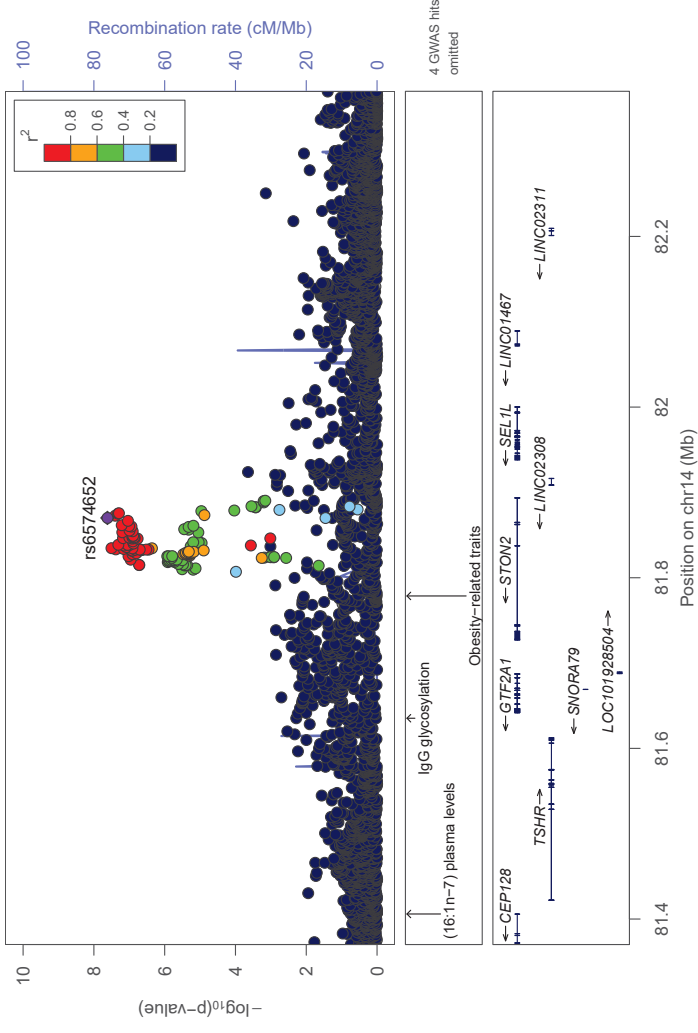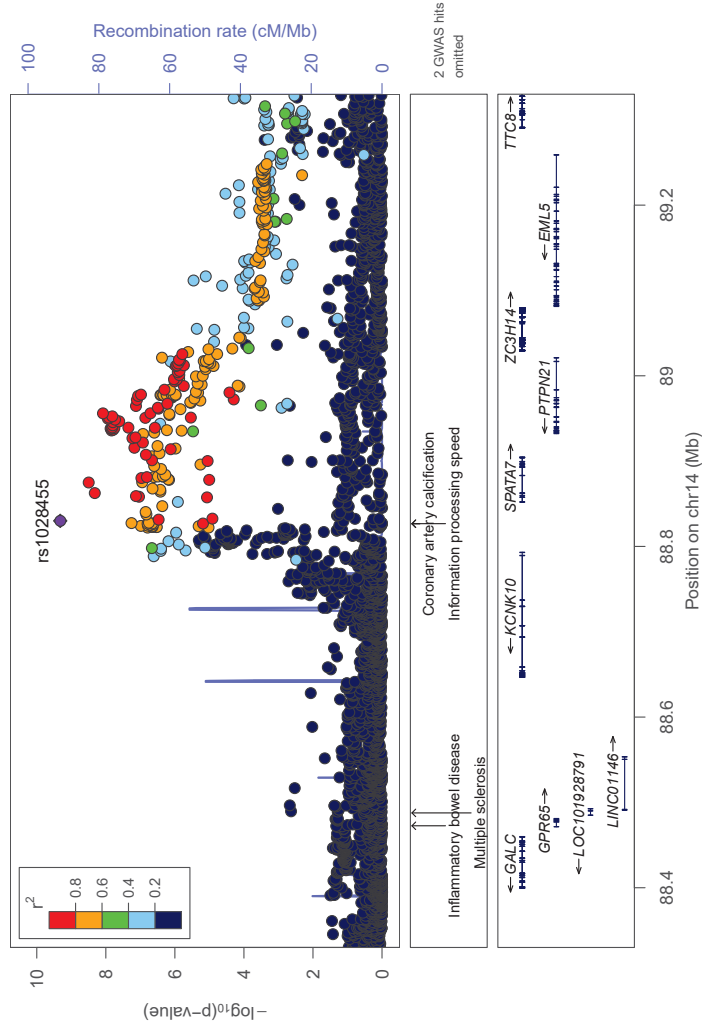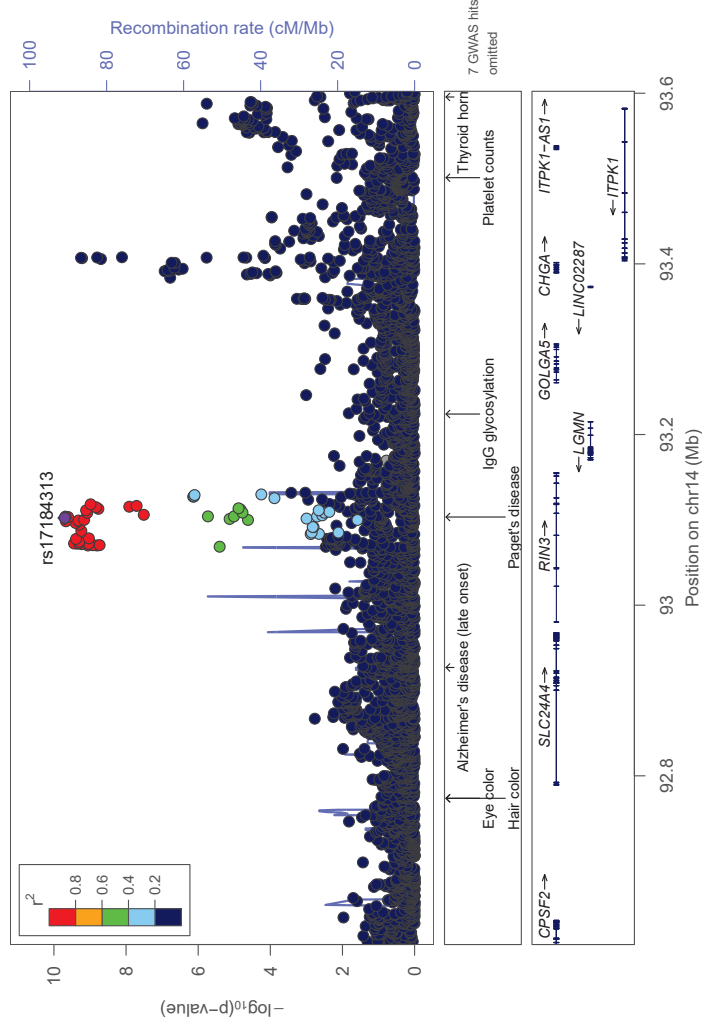

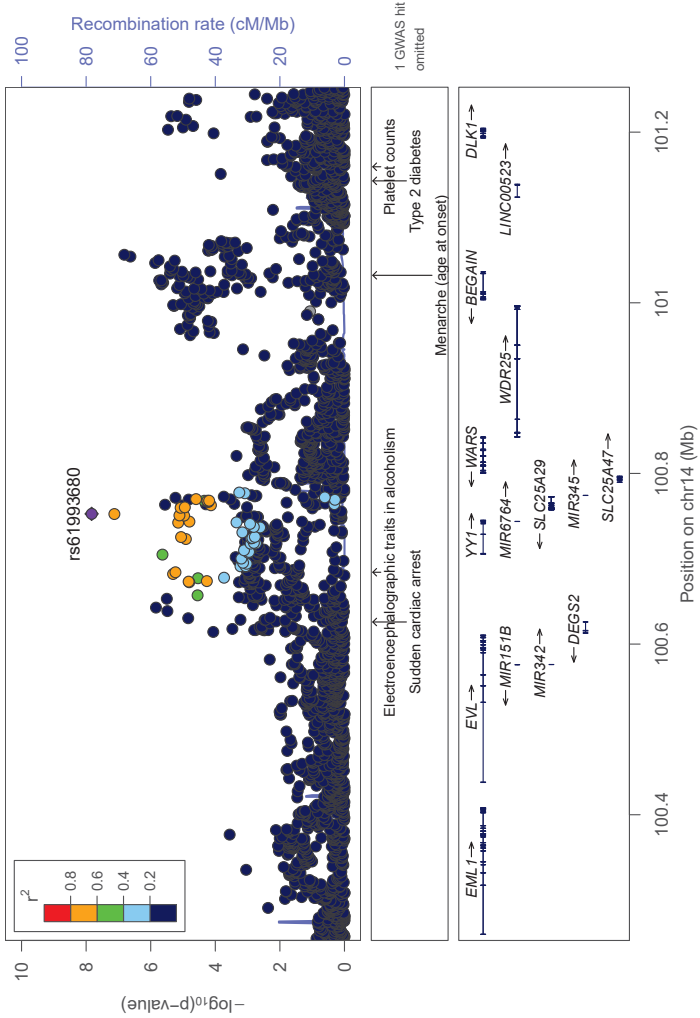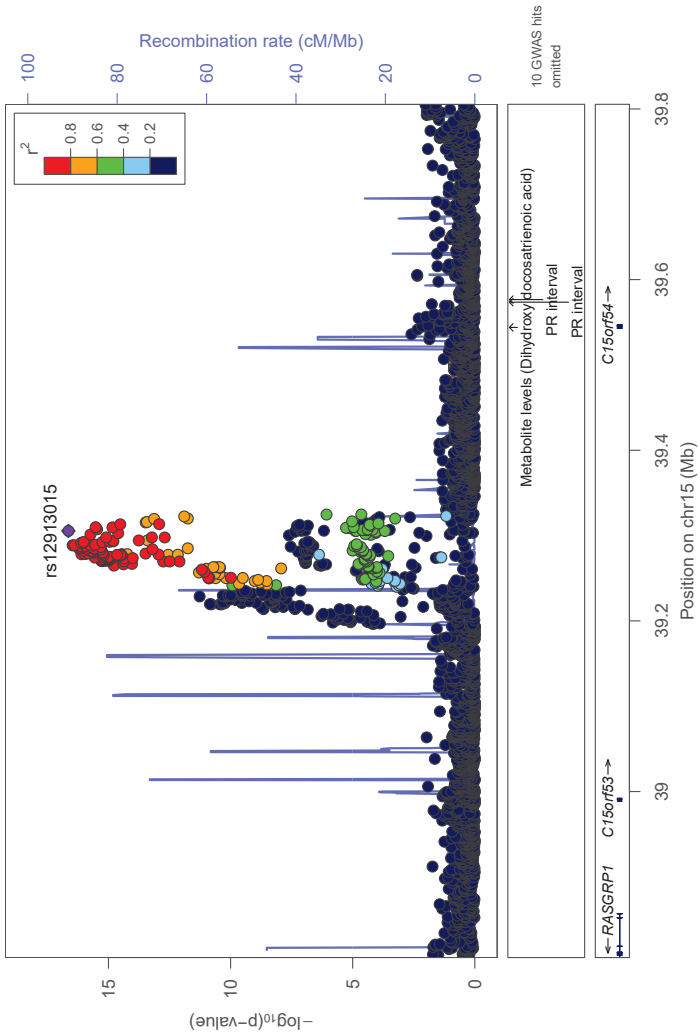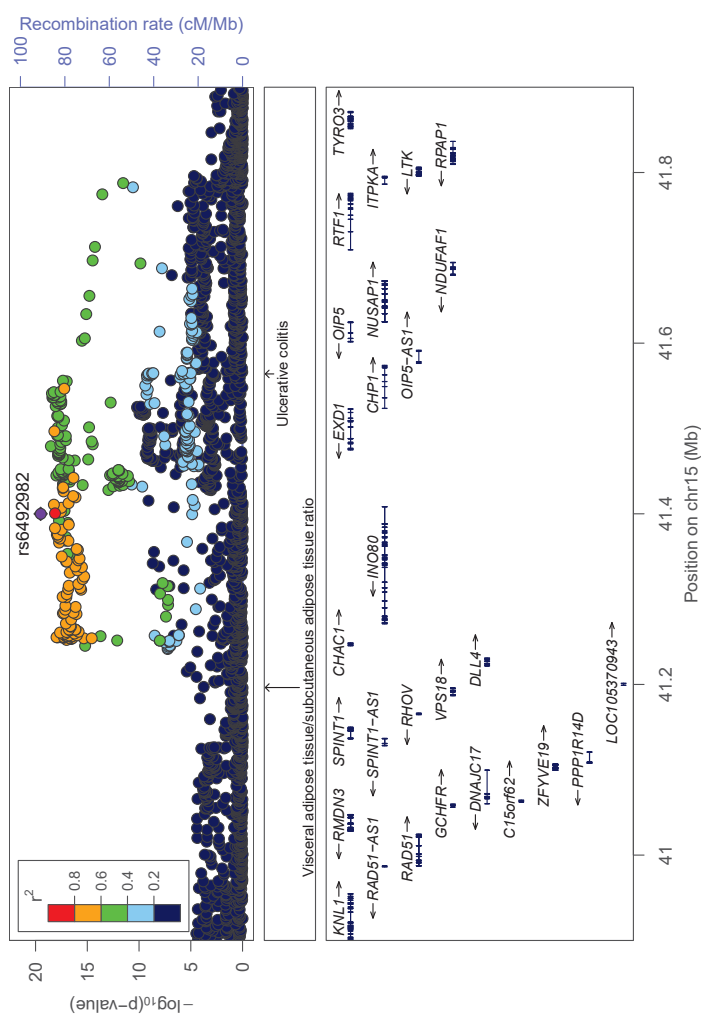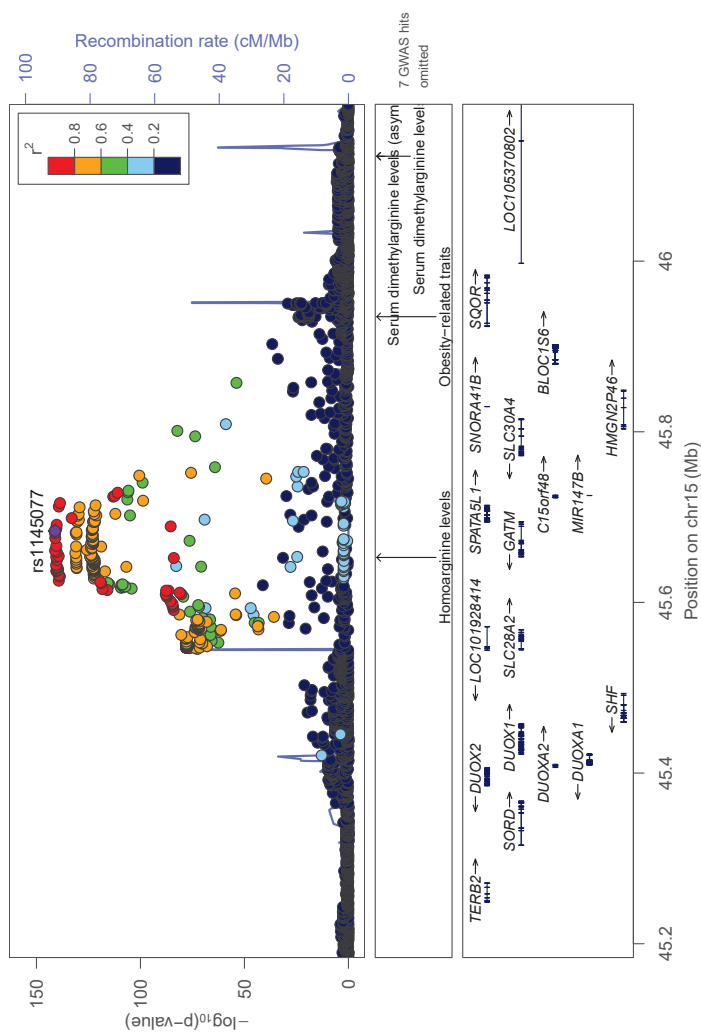

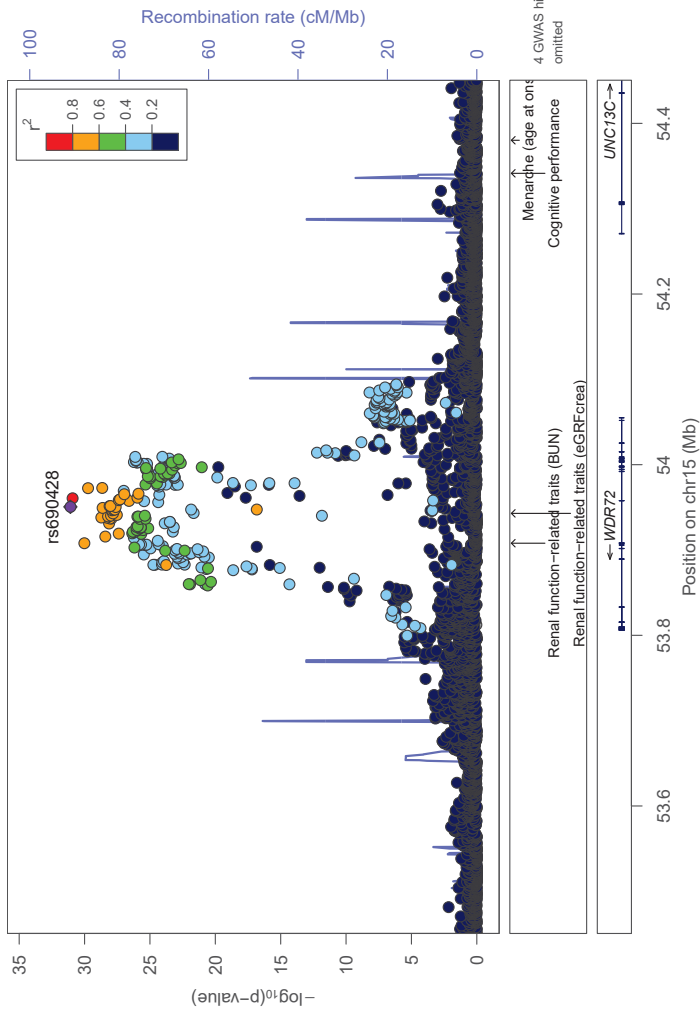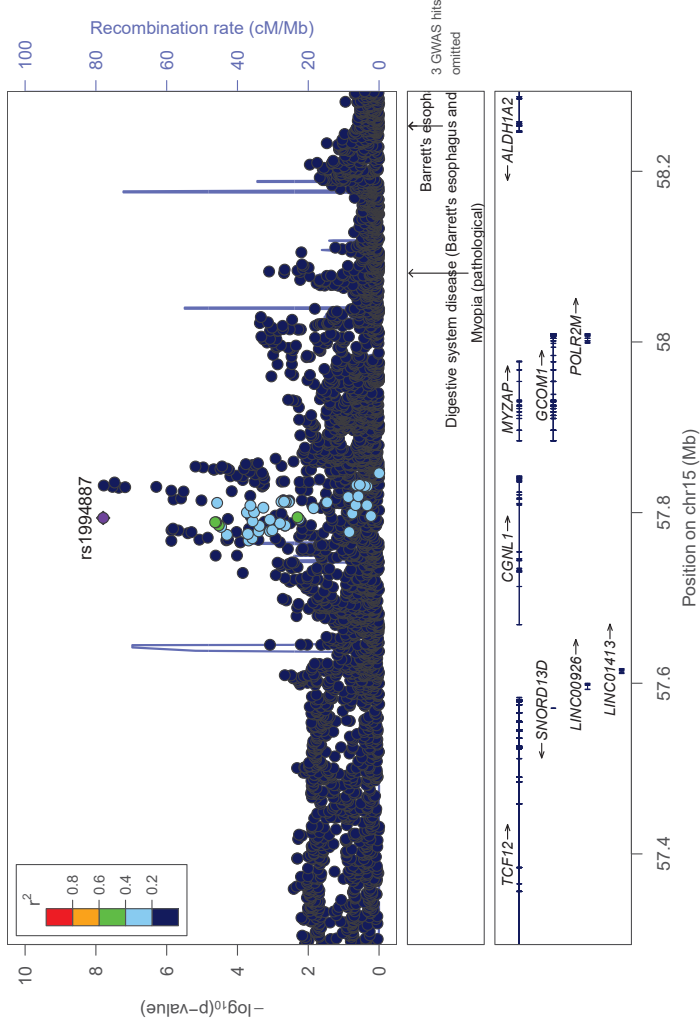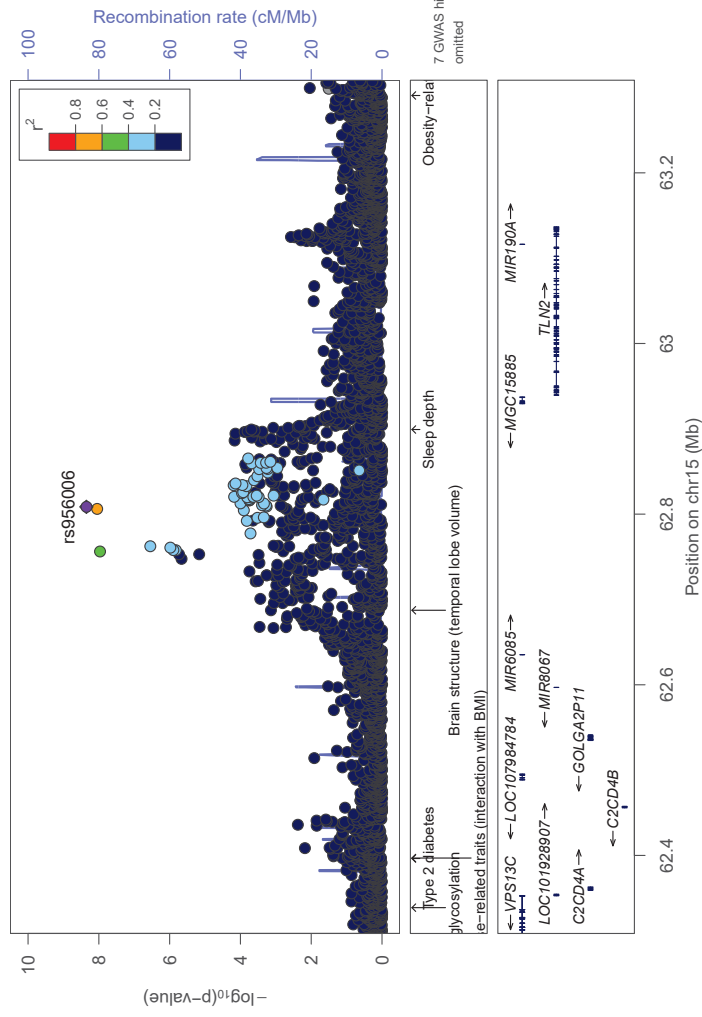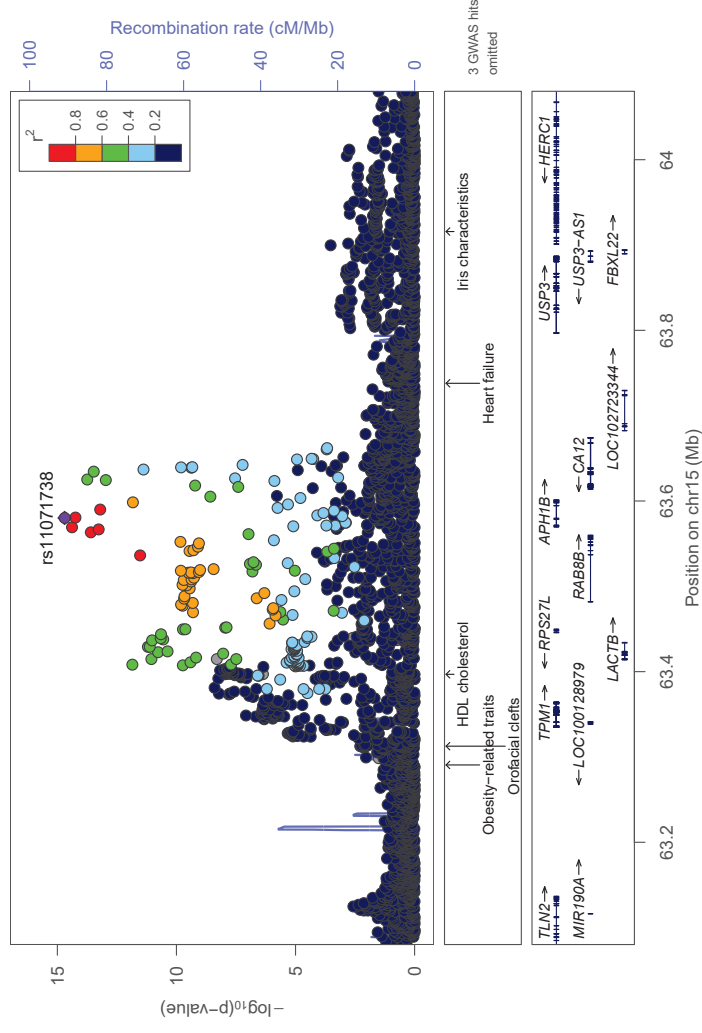

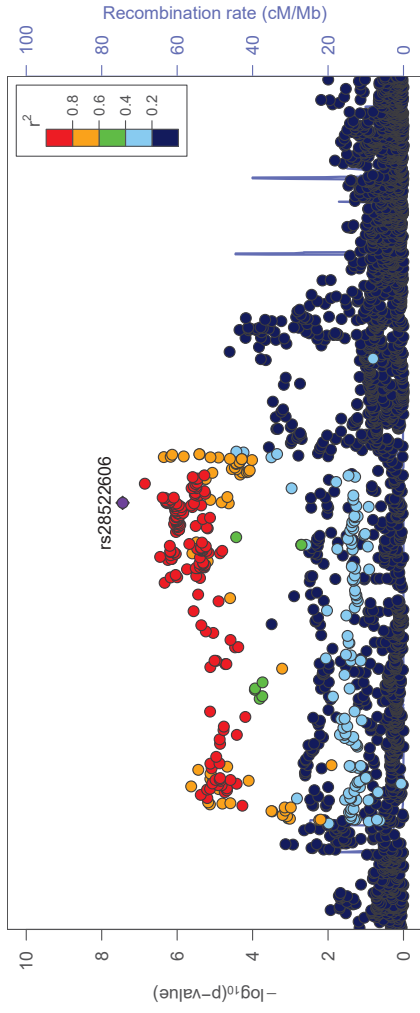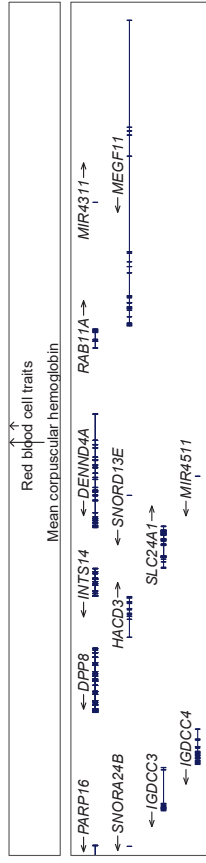

Red blood cell traits  
Mean corpuscular hemoglobin

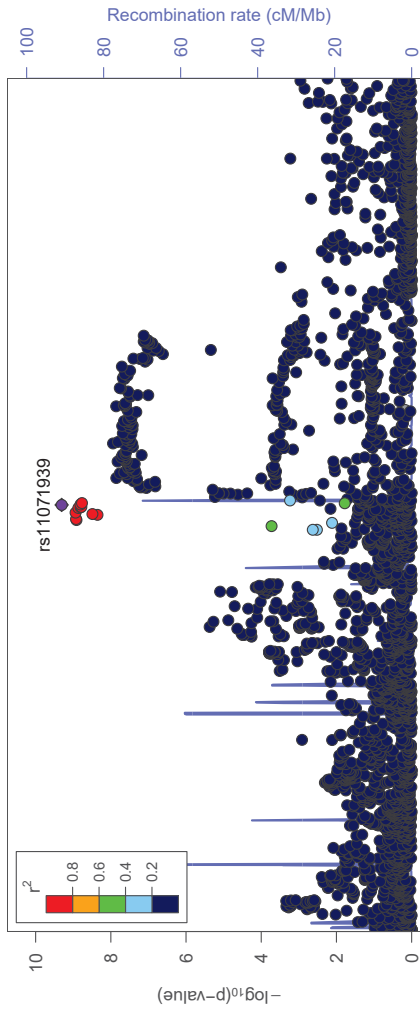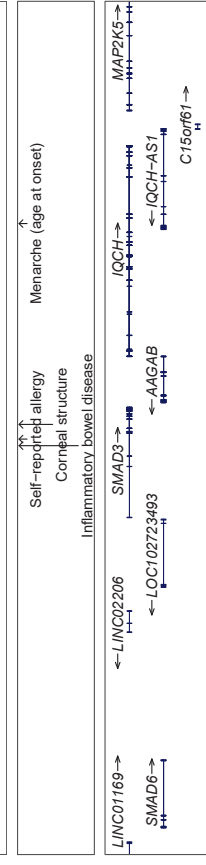

Self-reported allergy  
Cornical structure  
Inflammatory bowel disease  
Menarche (age at onset)

4 GWAS hits omitted

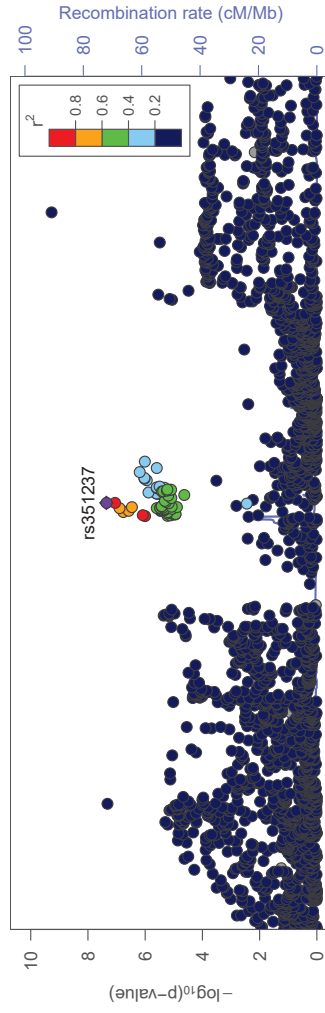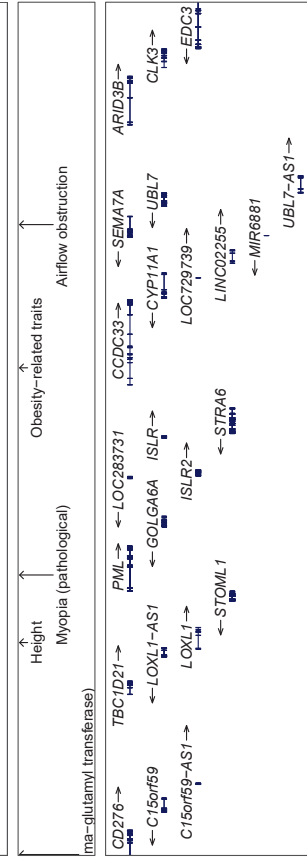

Height  
Myopia (pathological)  
Obesity-related traits  
Airflow obstruction

Systemic lupus erythematosus and Syst  
Blood trace element (Zn levels)  
Adverse response to chemotherapy (neutropenia/leuc)

16 GWAS hits omitted

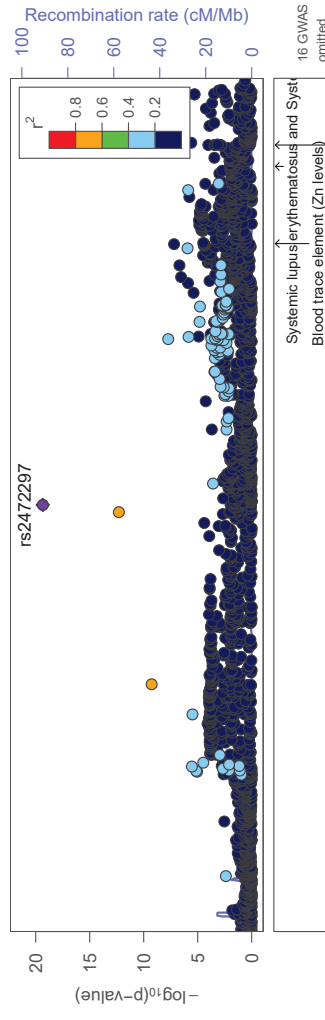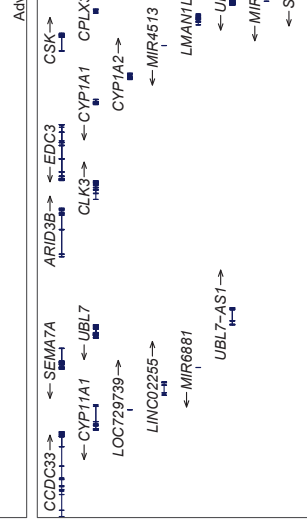

Systemic lupus erythematosus and Syst  
Blood trace element (Zn levels)  
Adverse response to chemotherapy (neutropenia/leuc)

16 GWAS hits omitted

Position on chr15 (Mb)

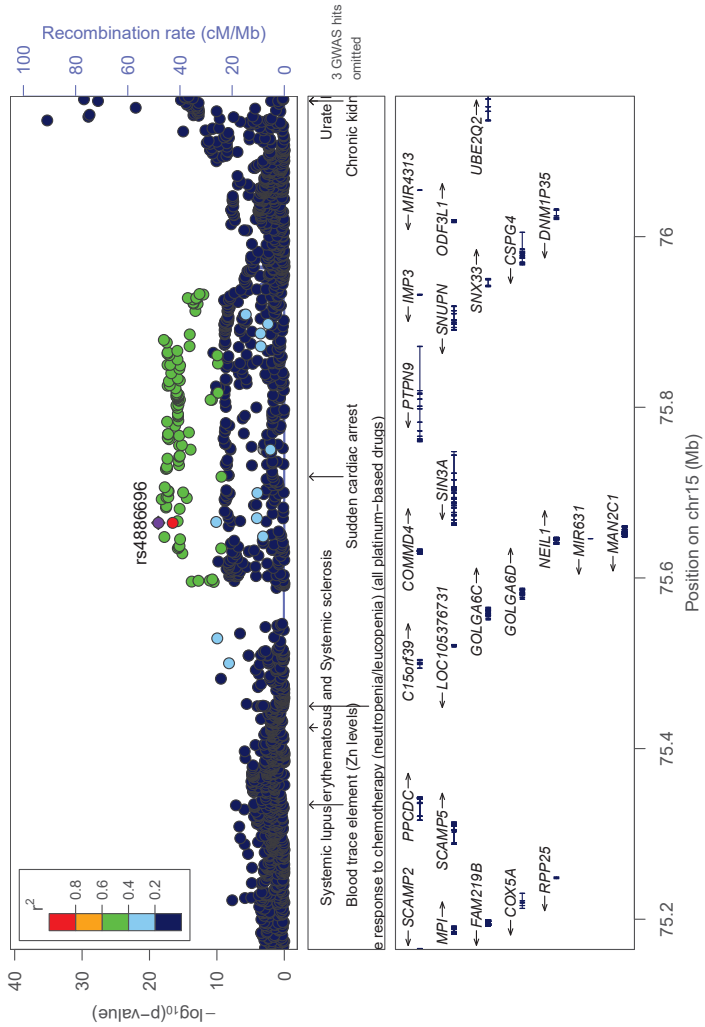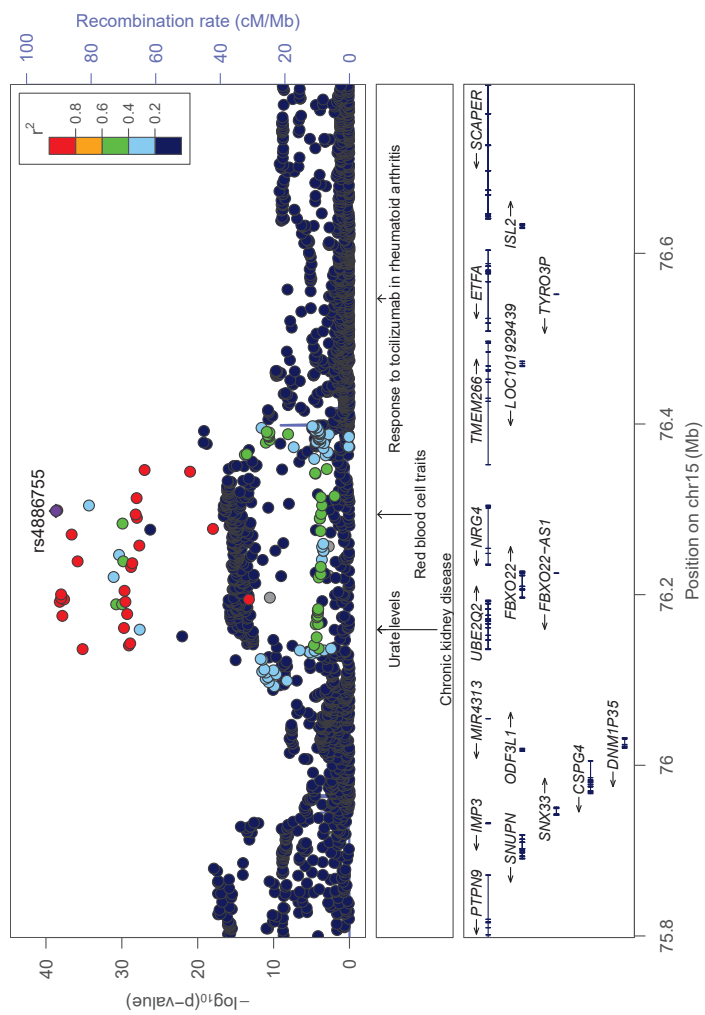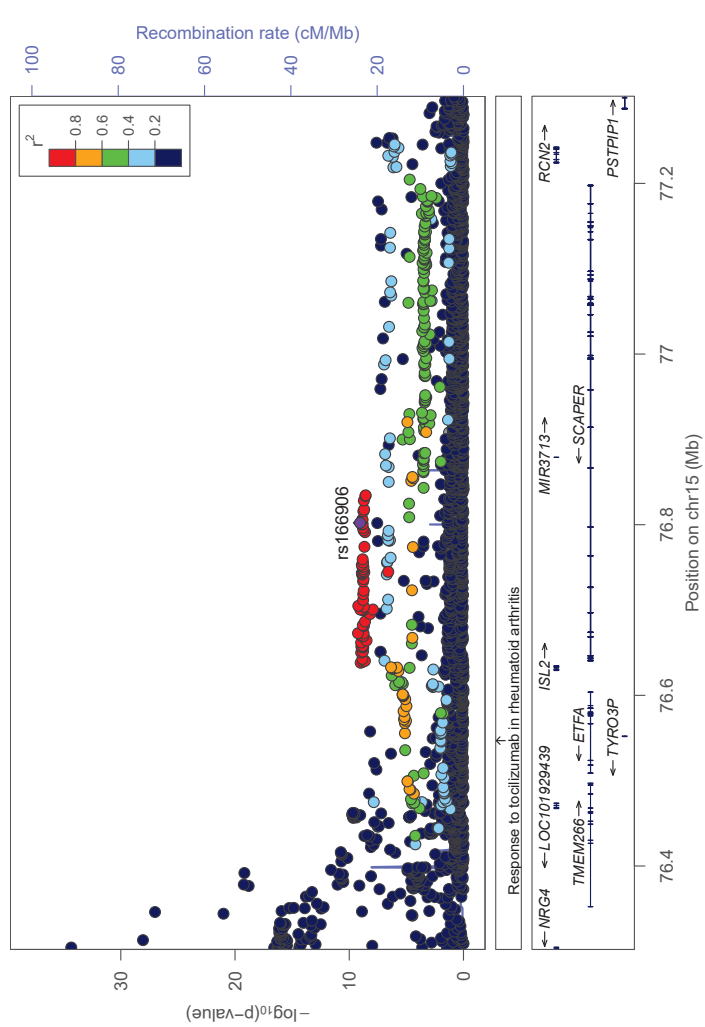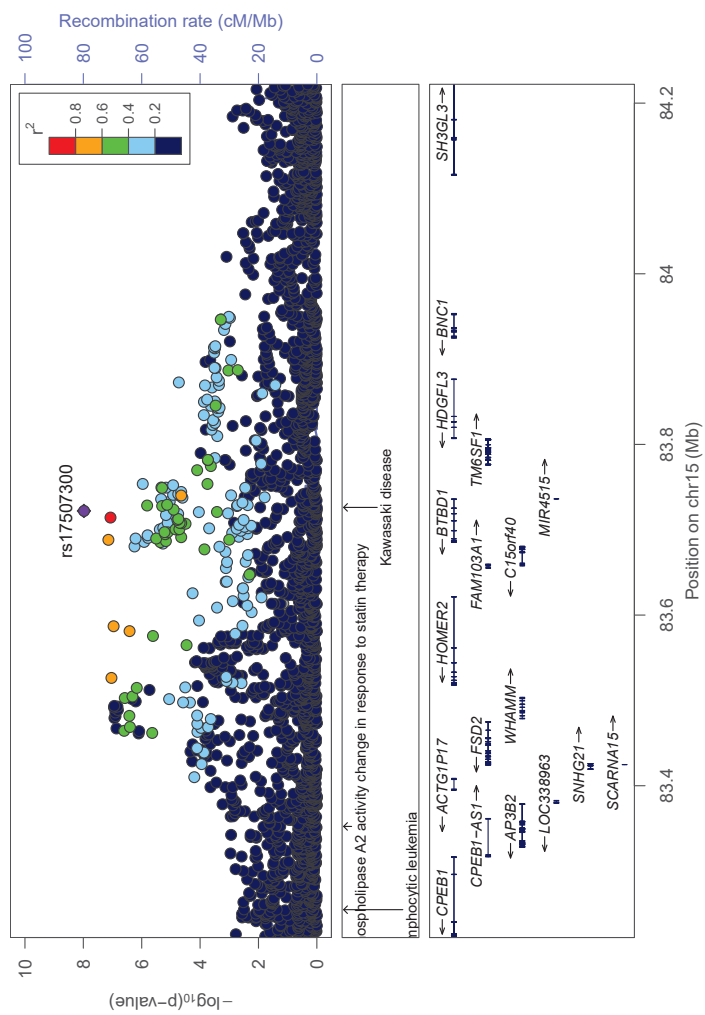

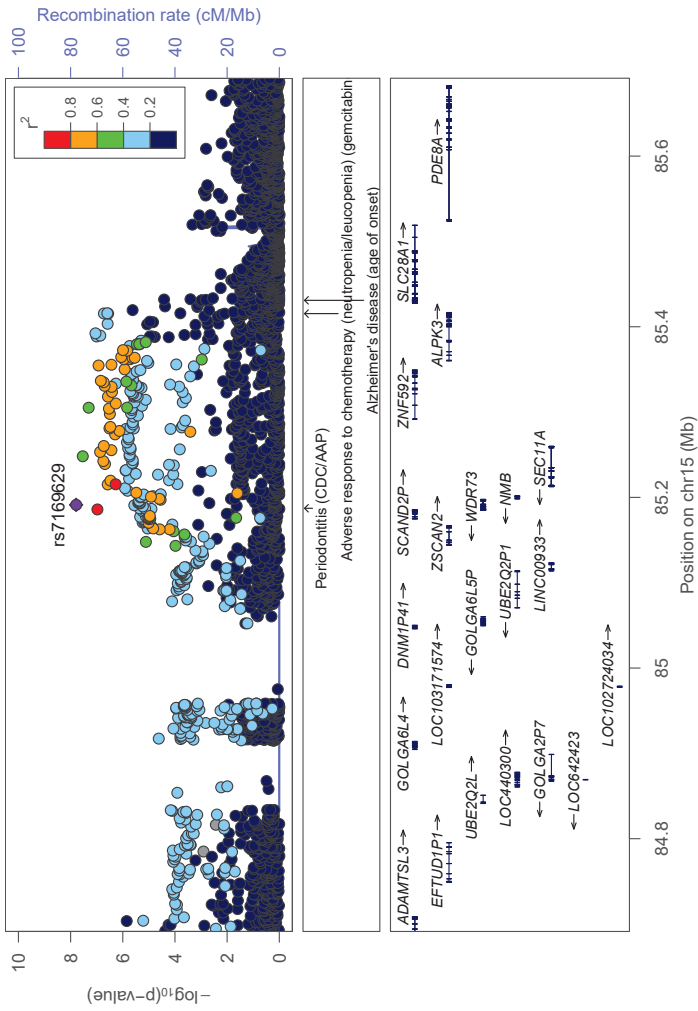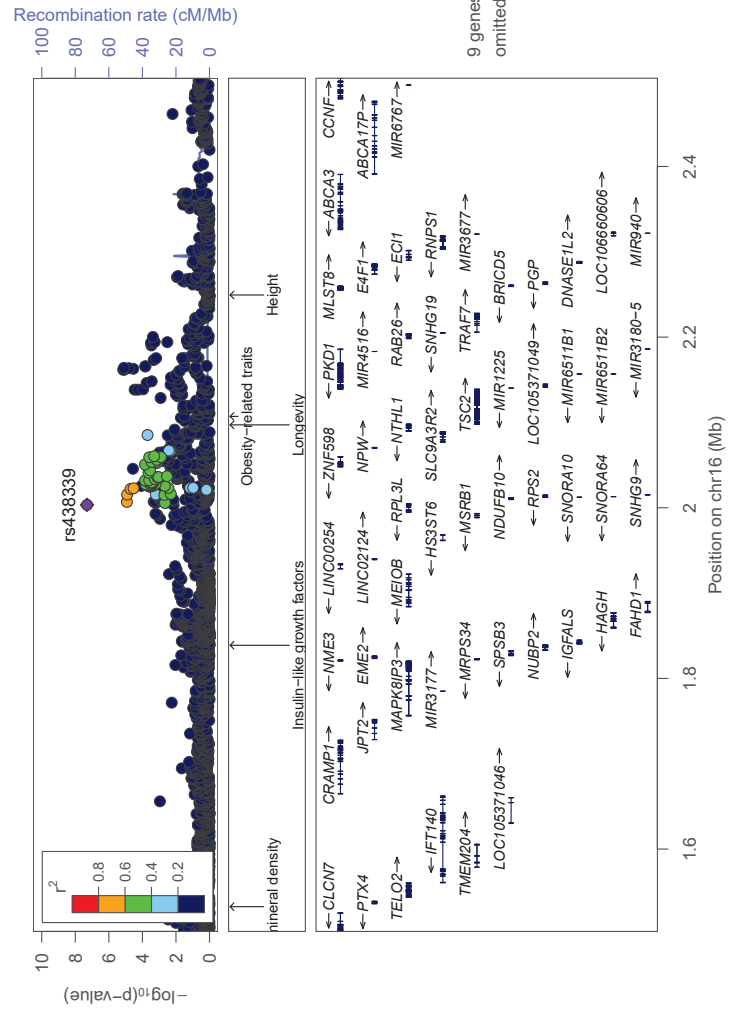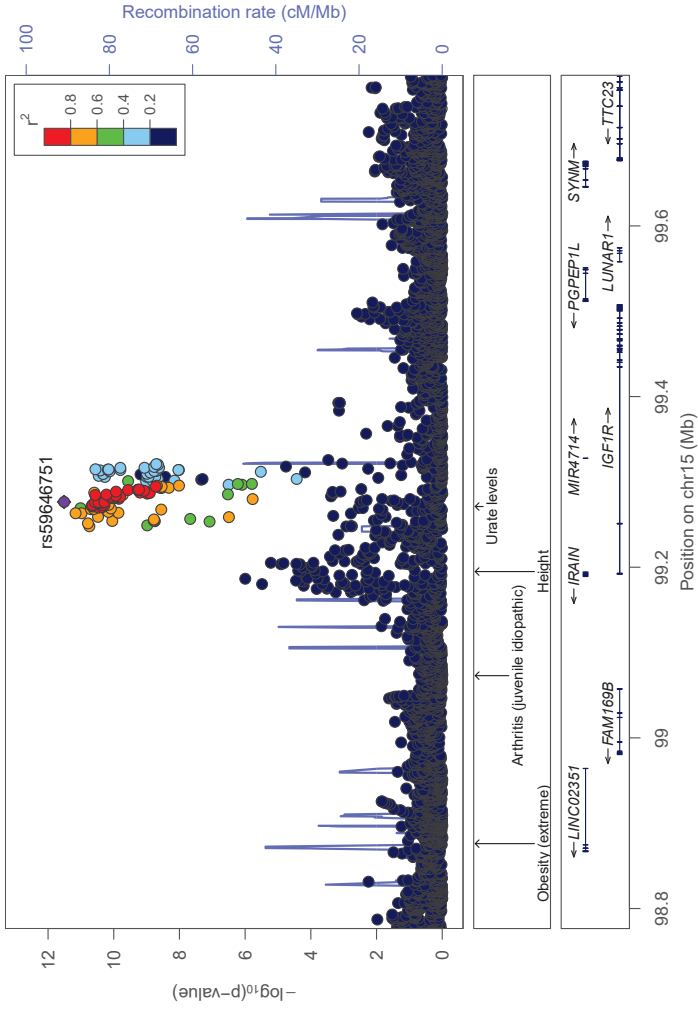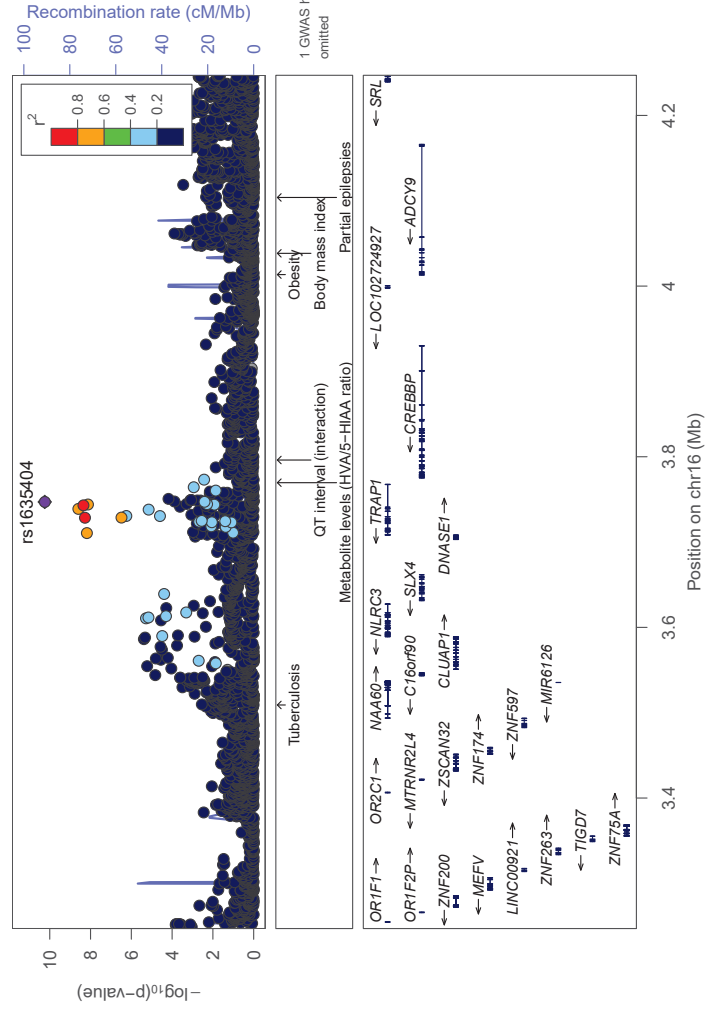



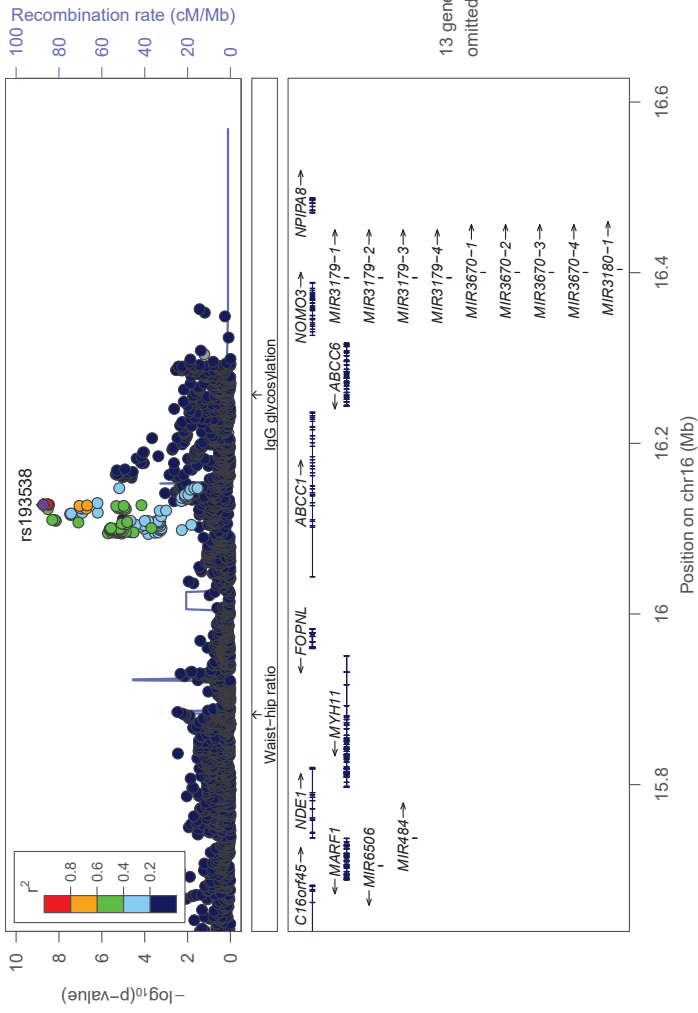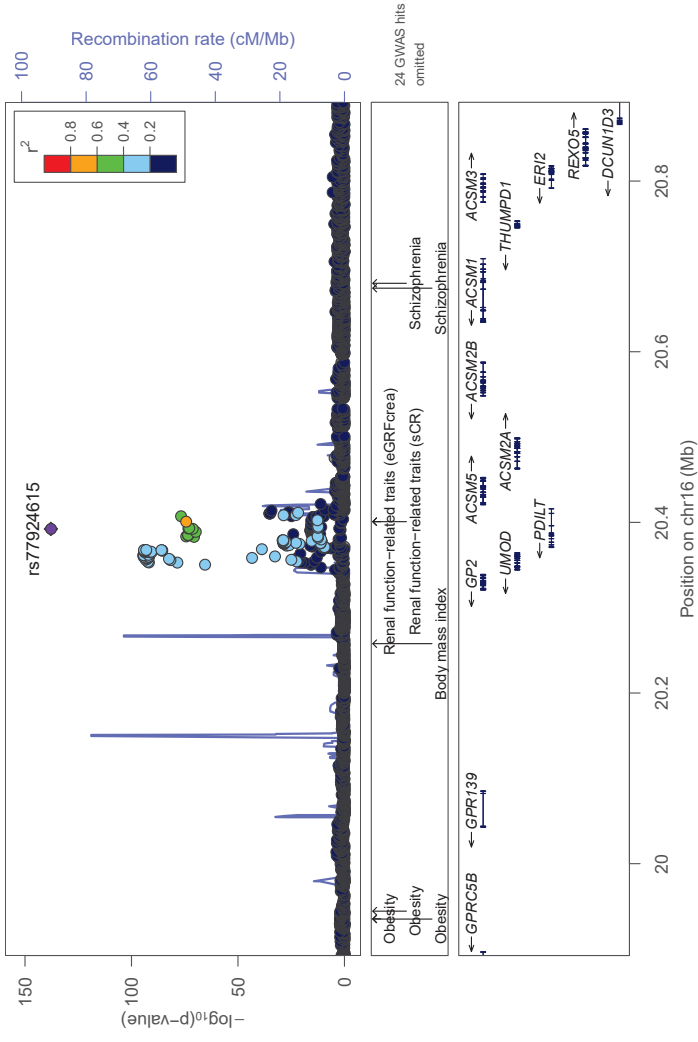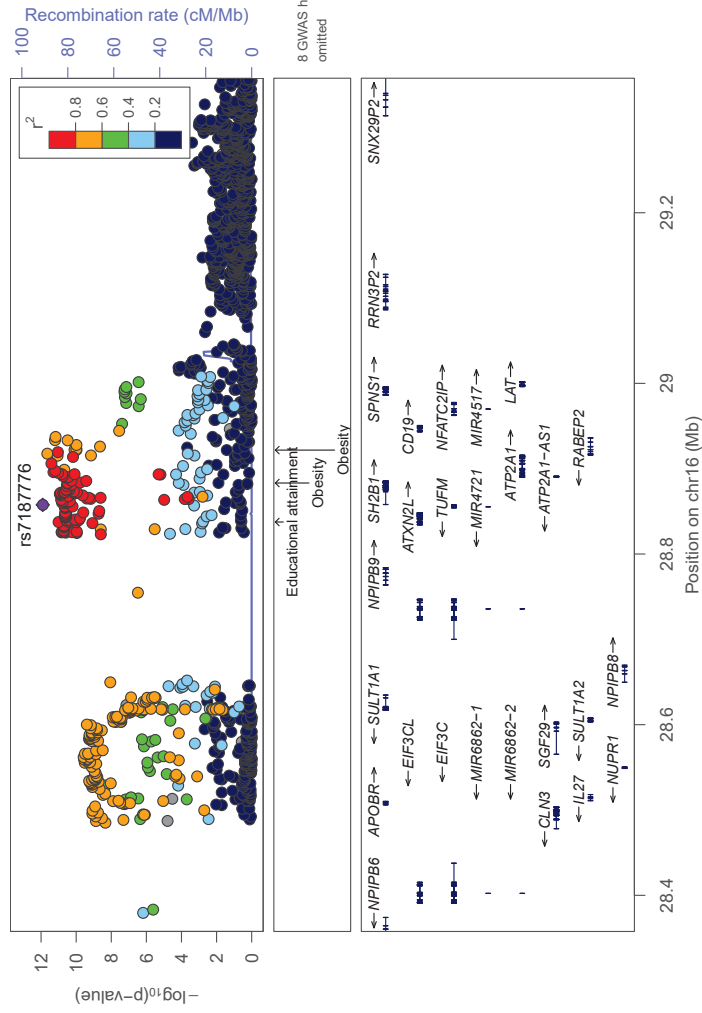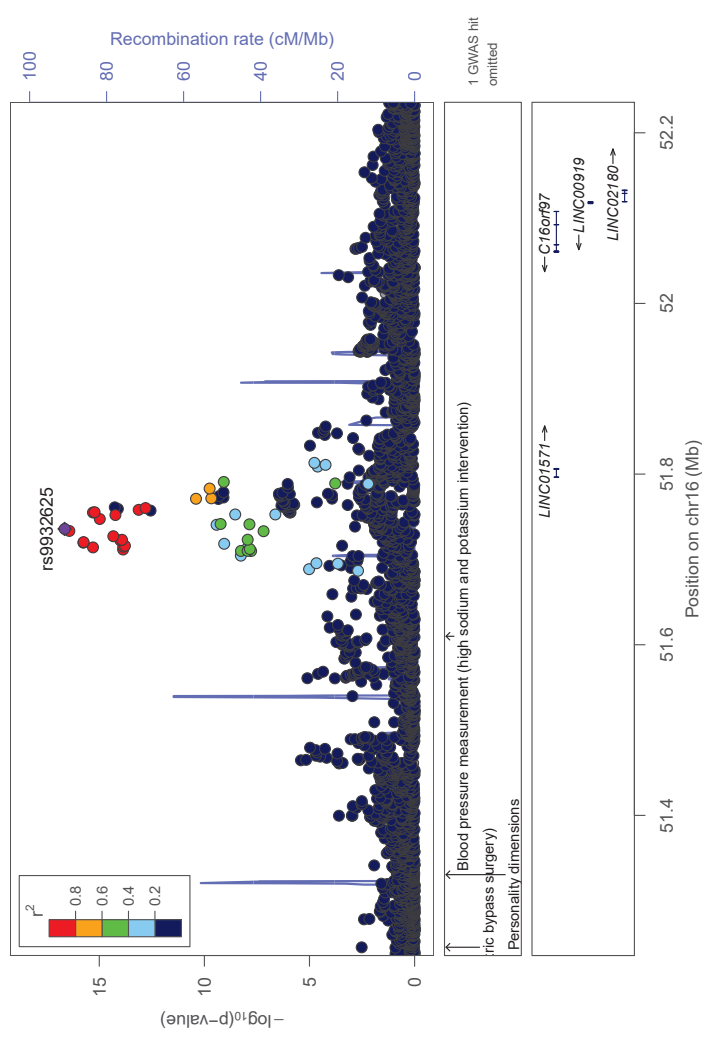

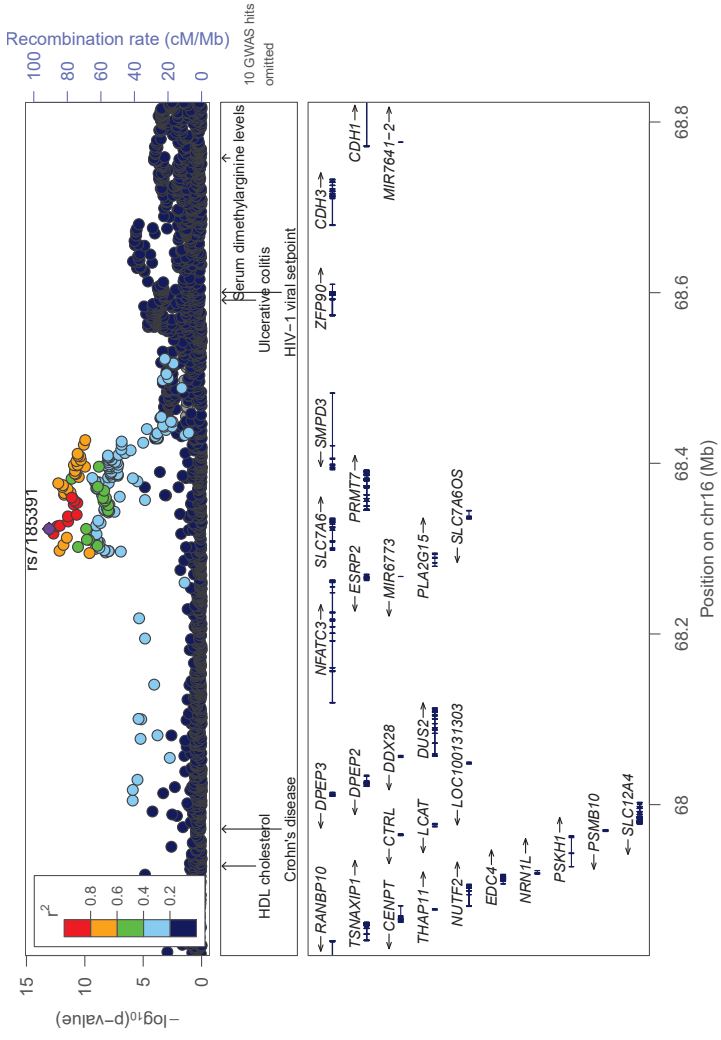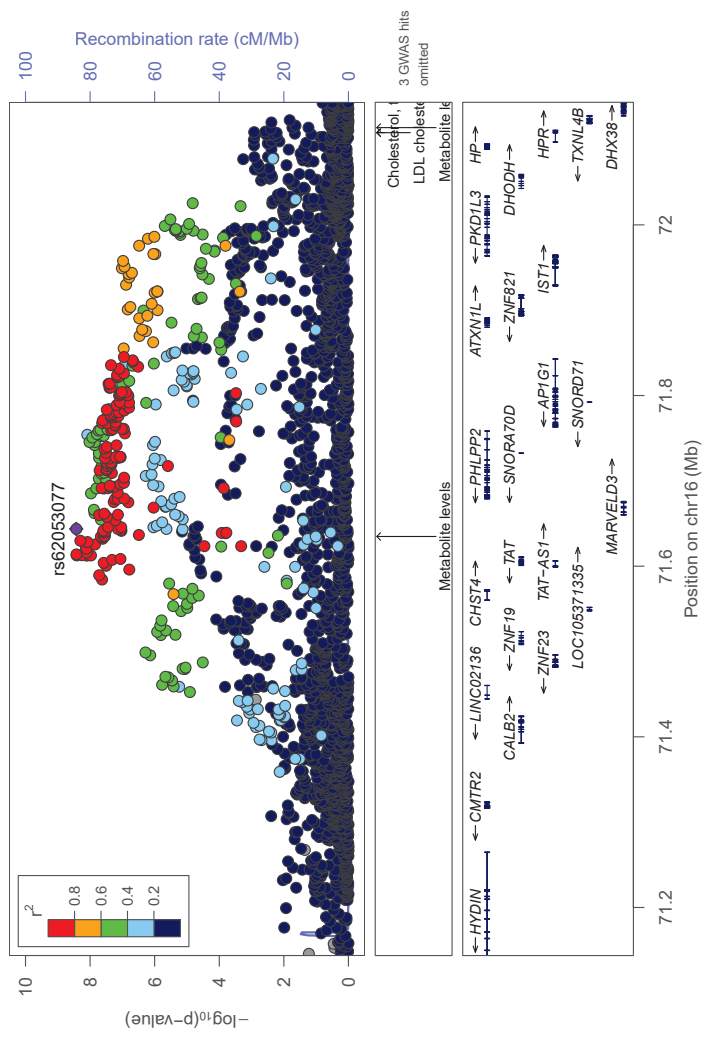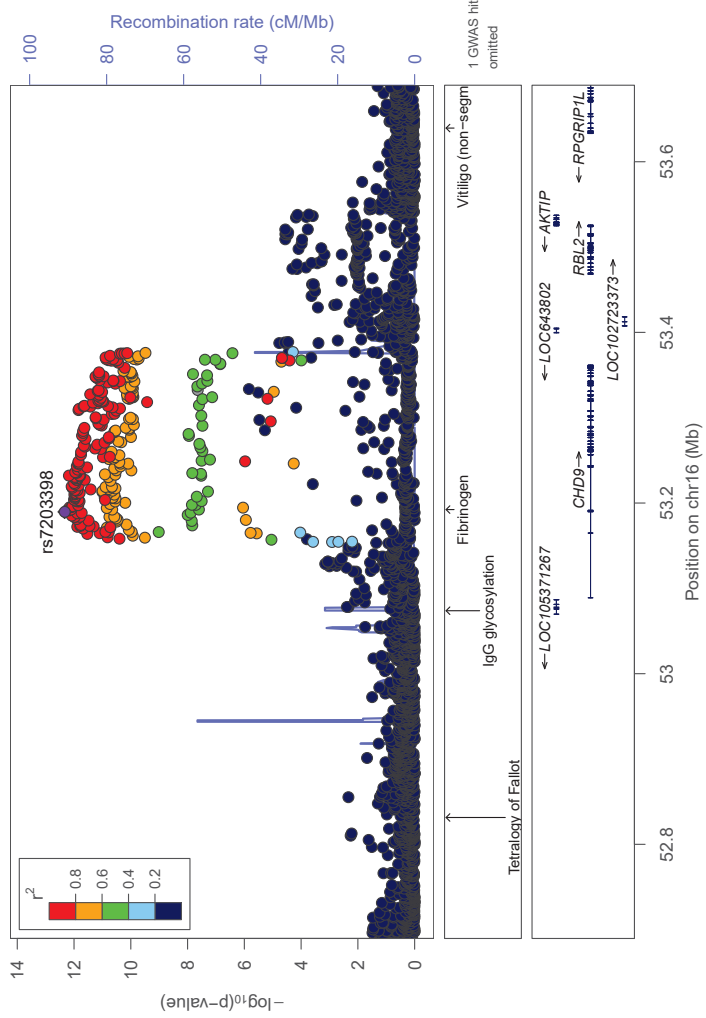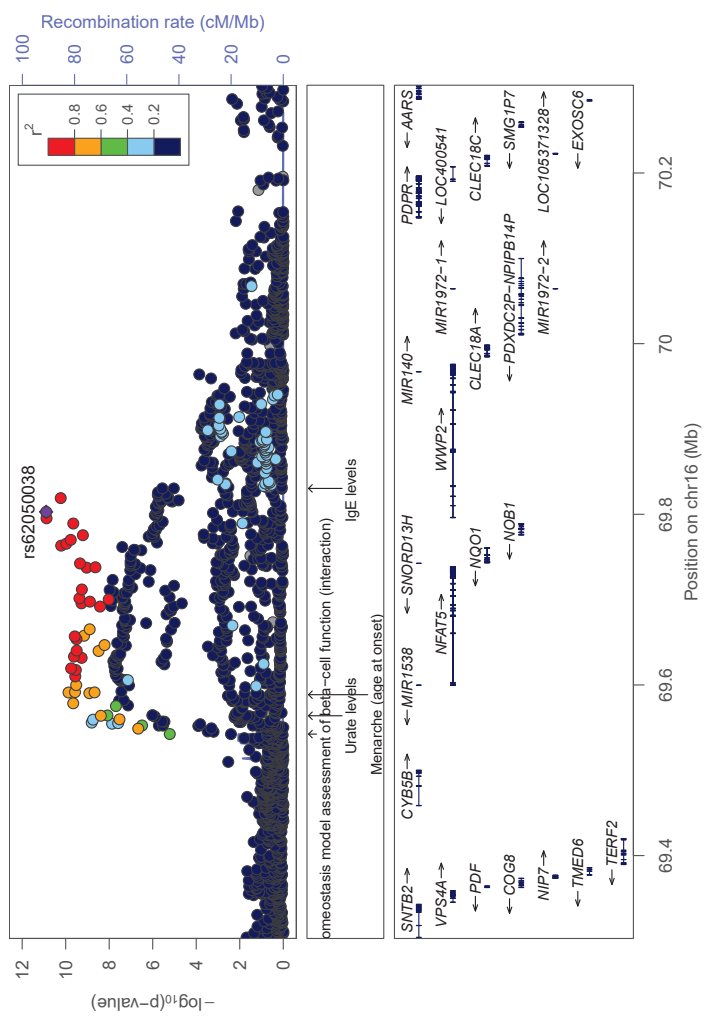

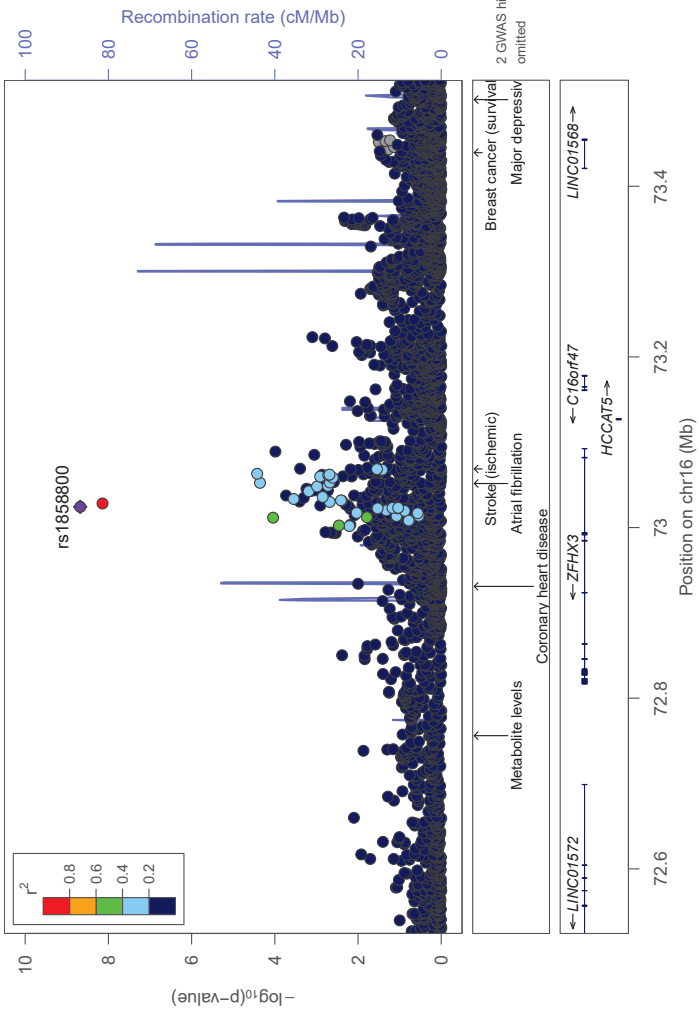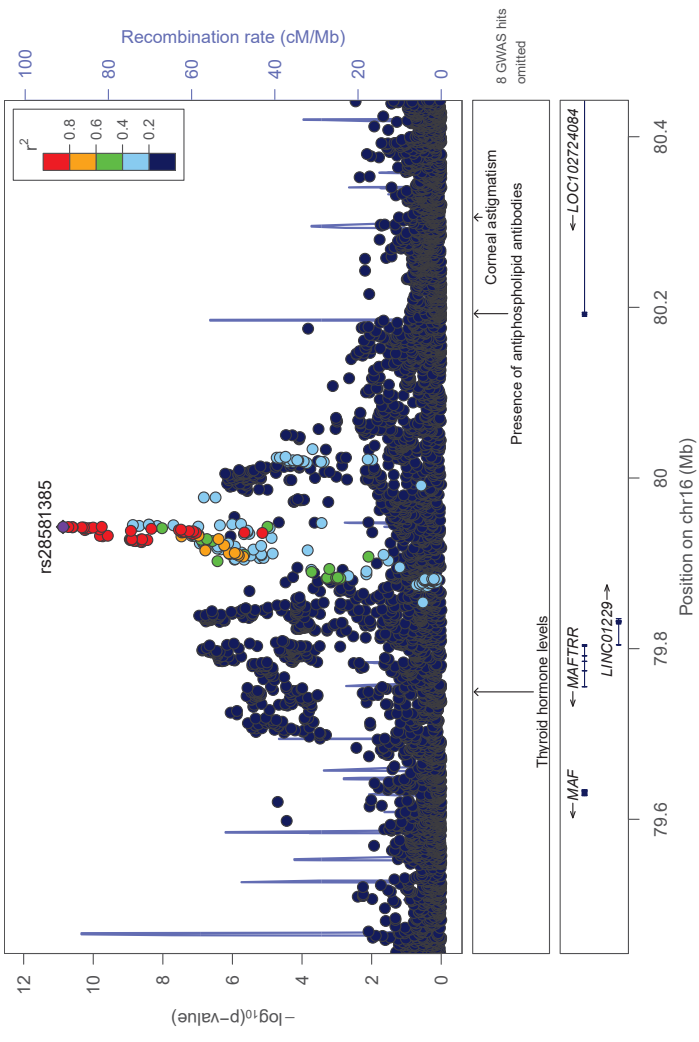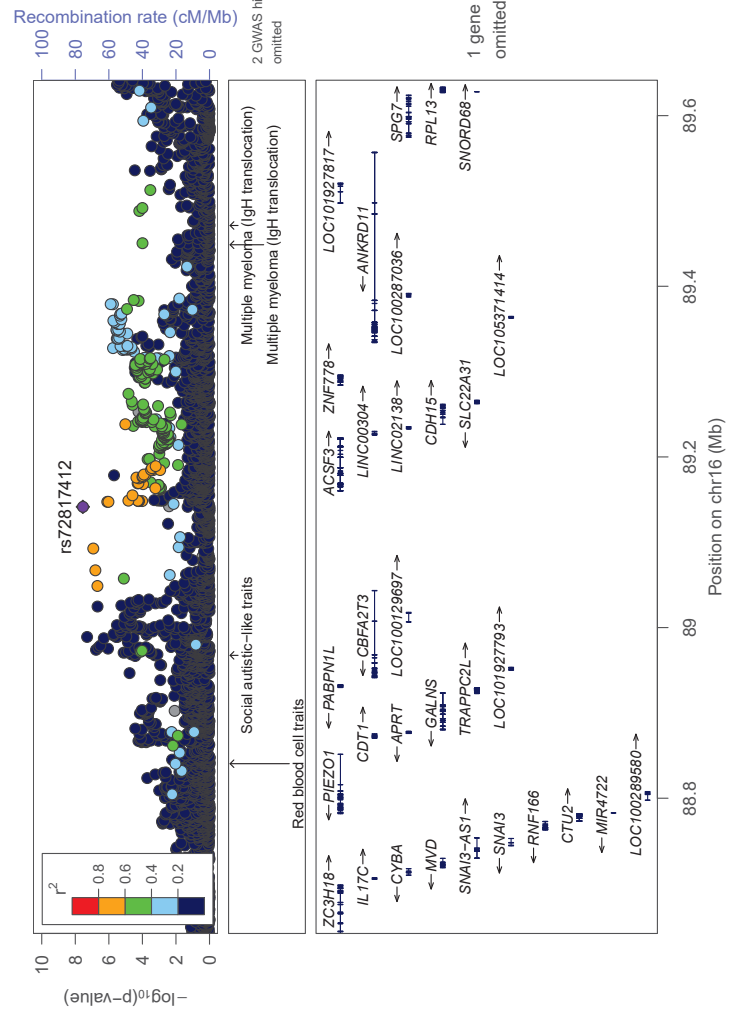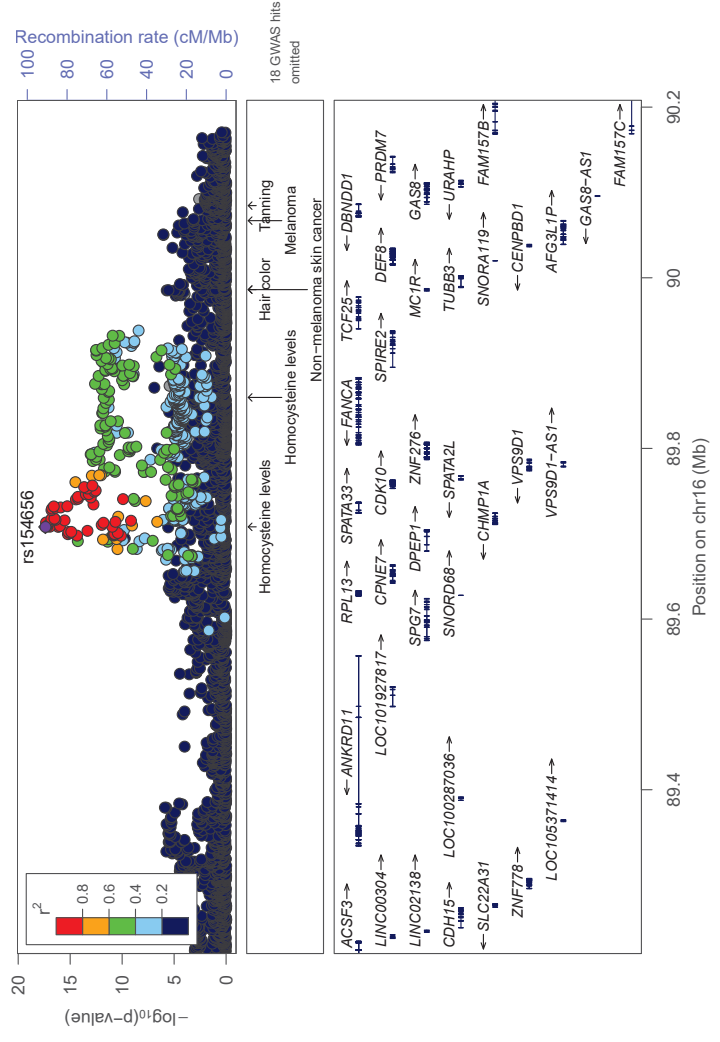

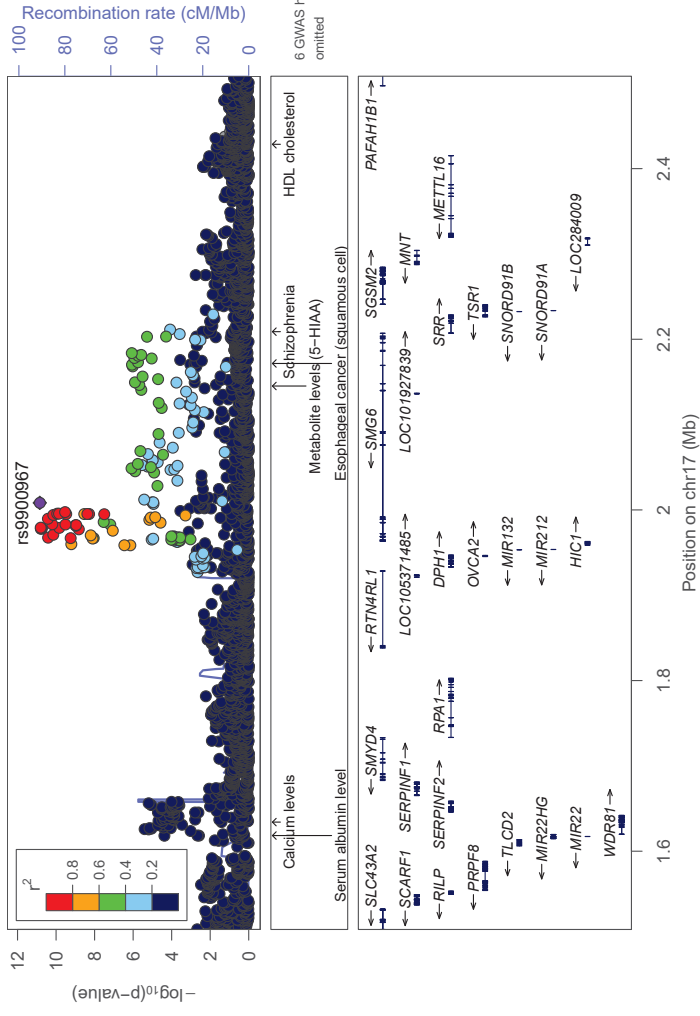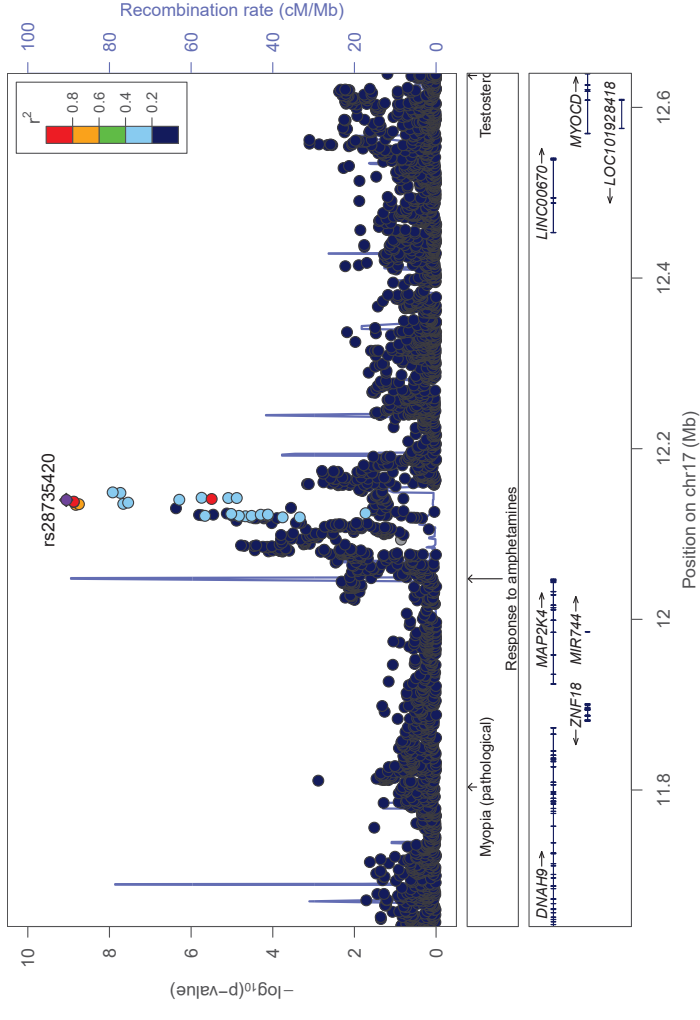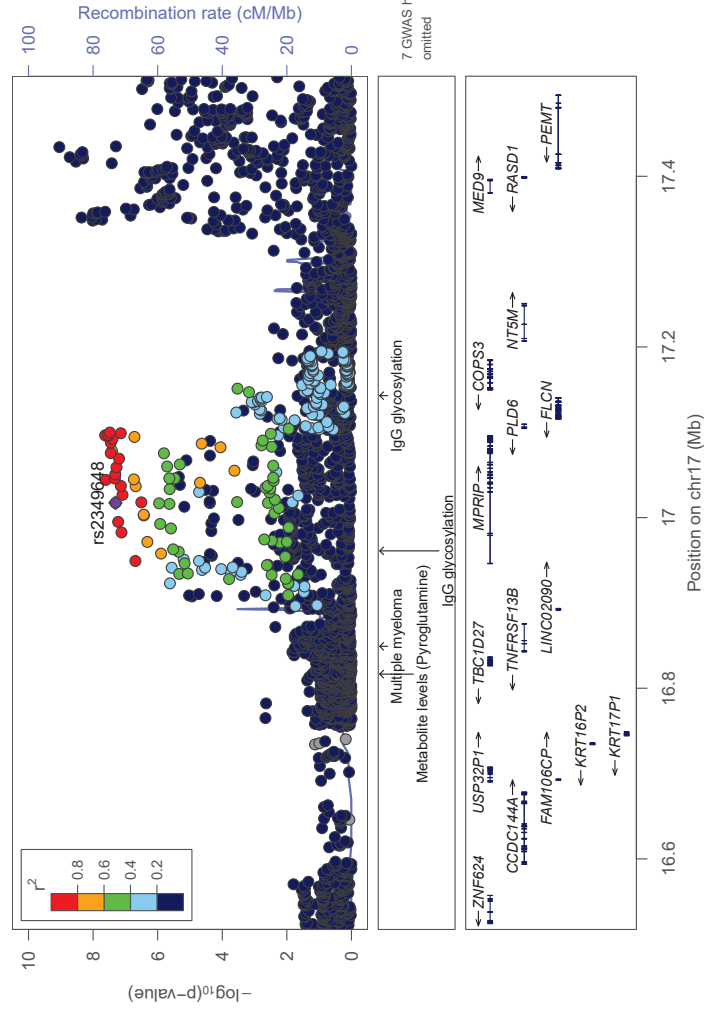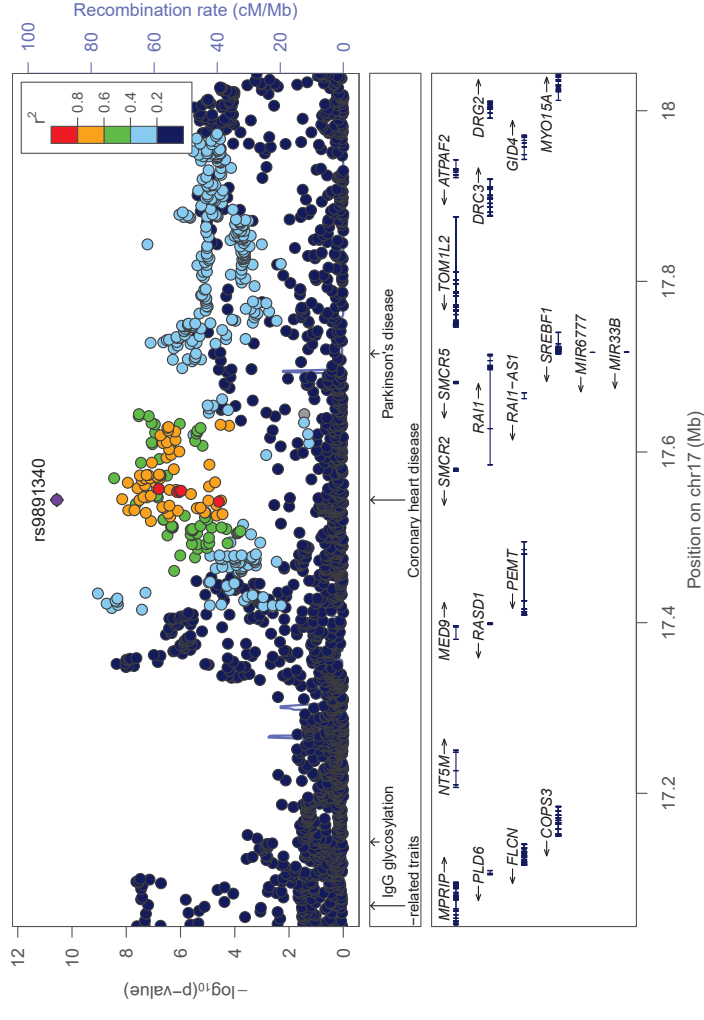

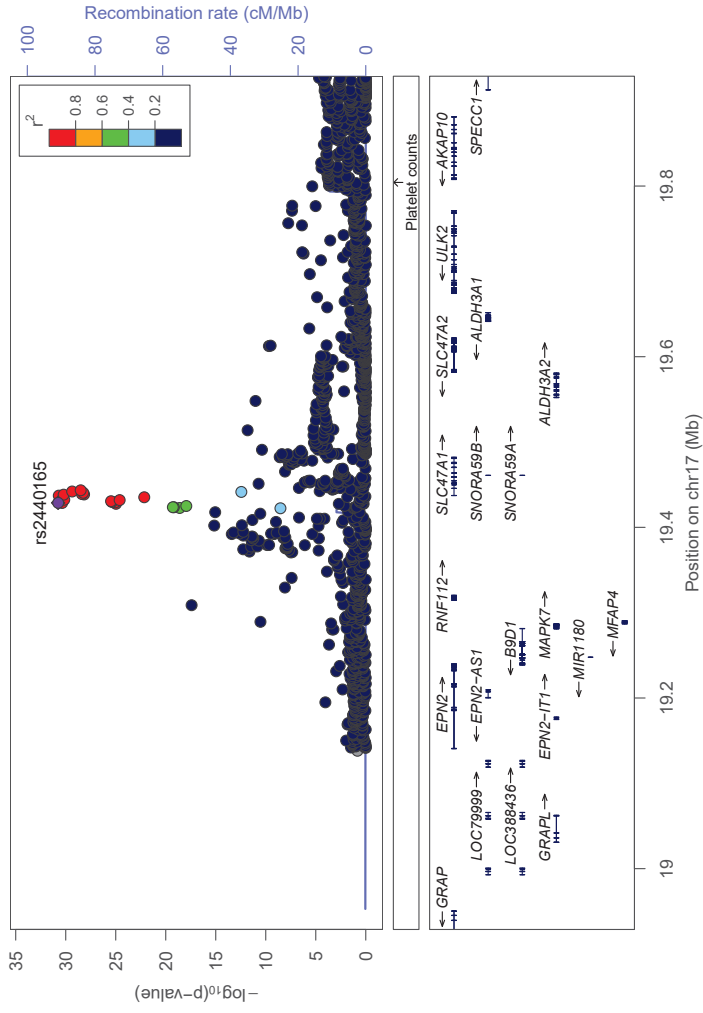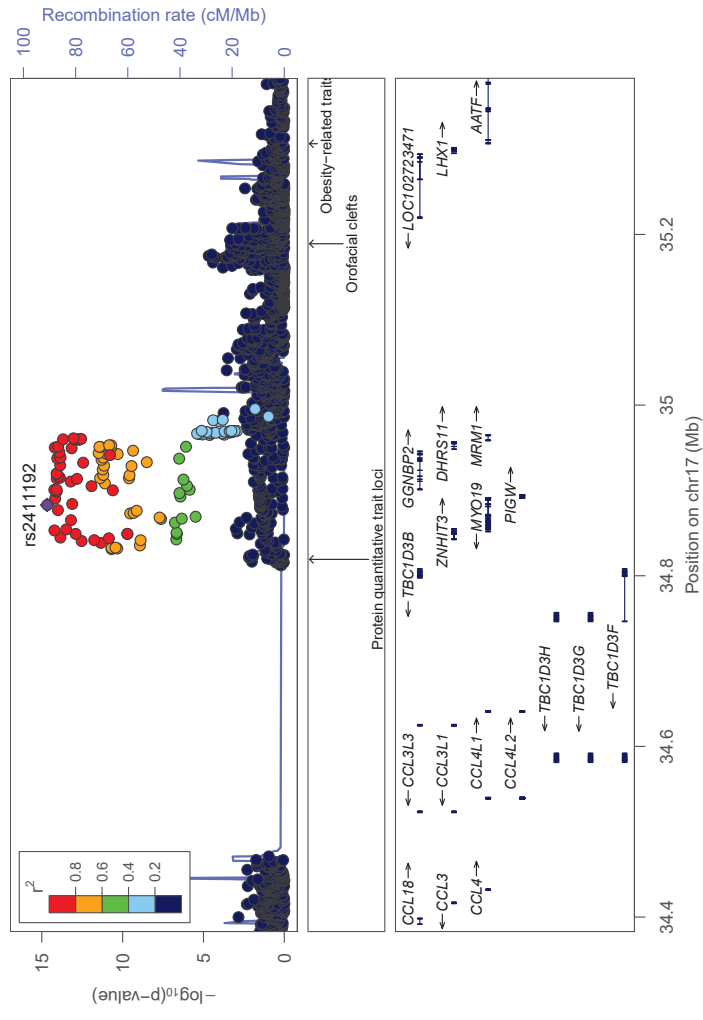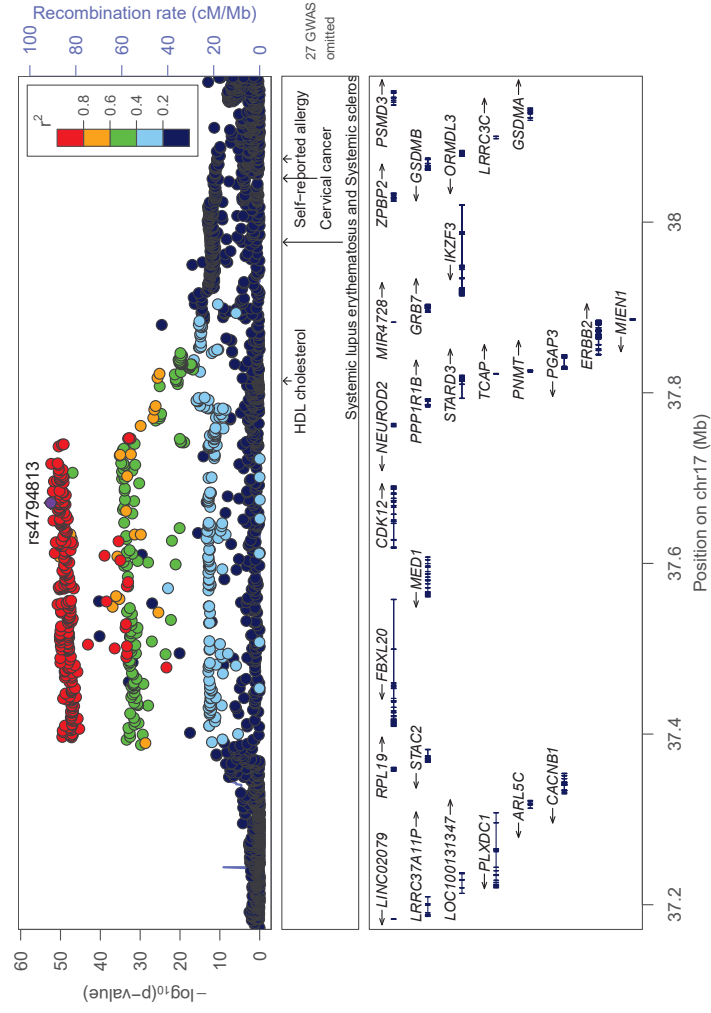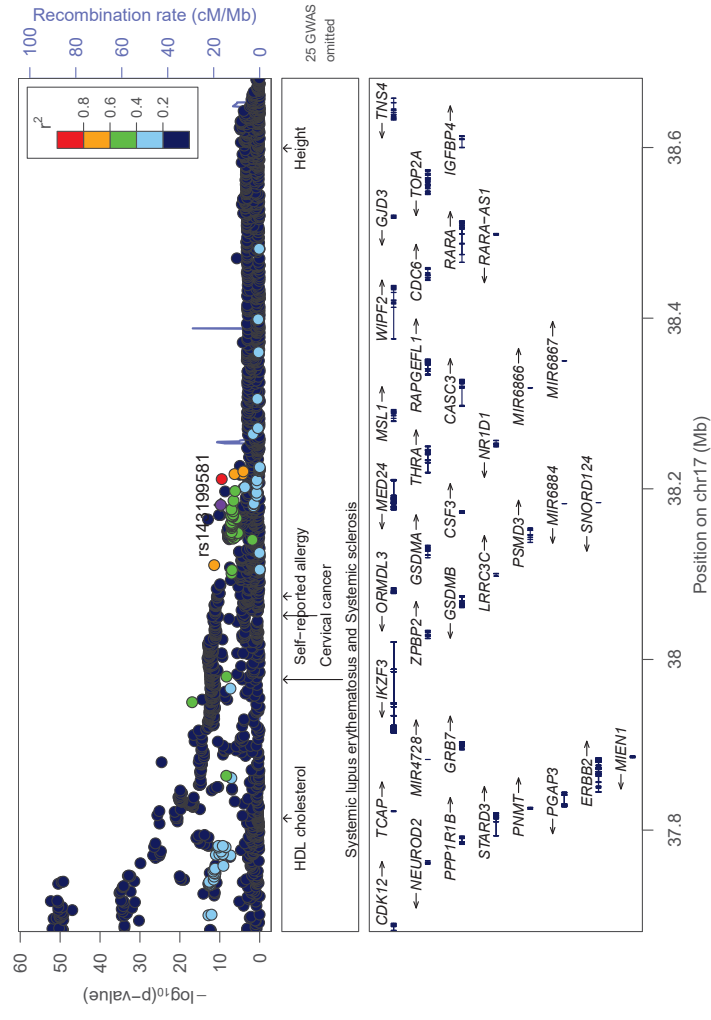

27 GWAS hits omitted

25 GWAS hits omitted

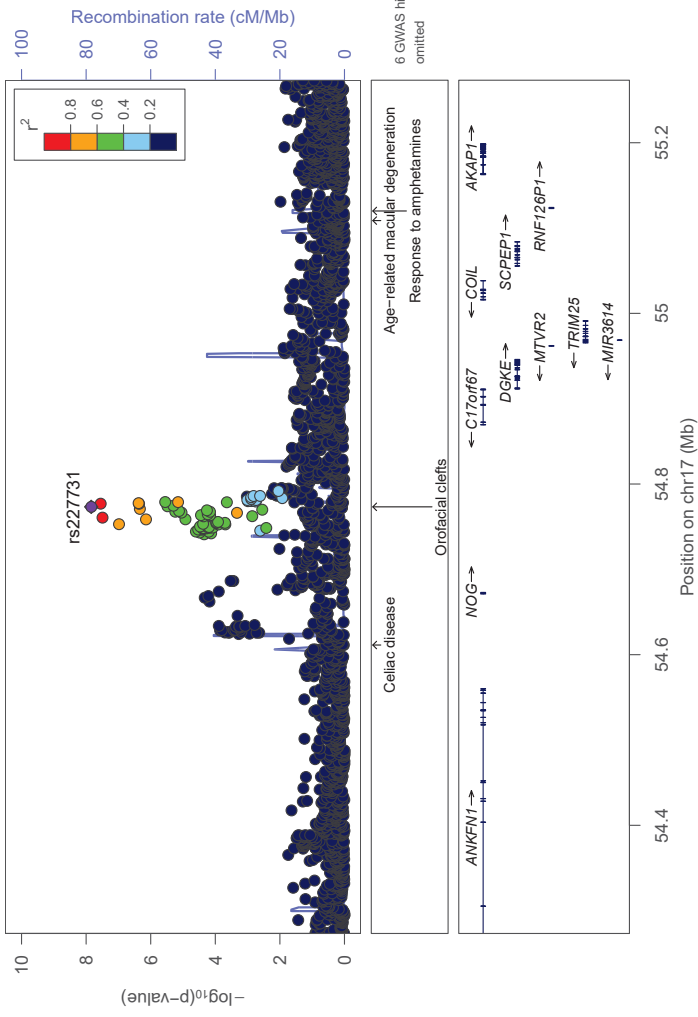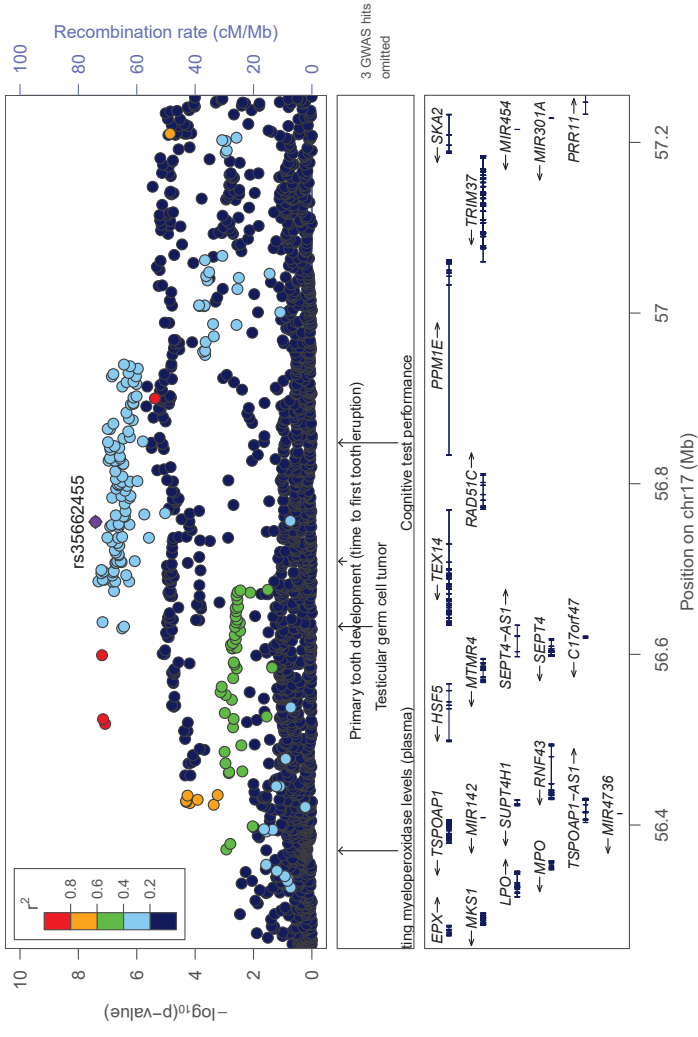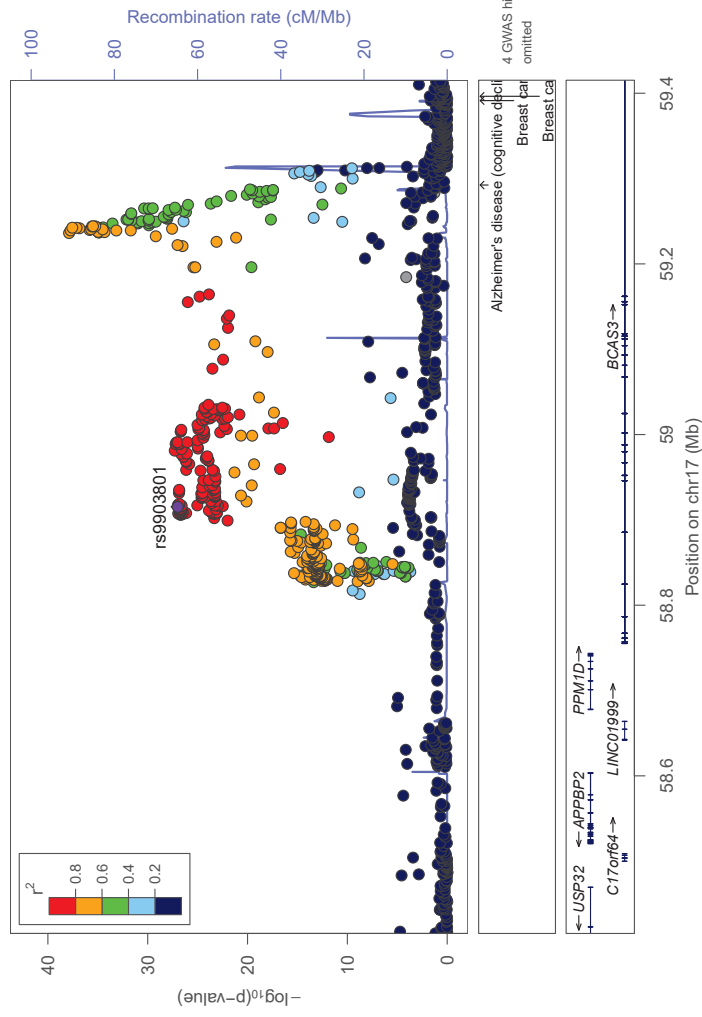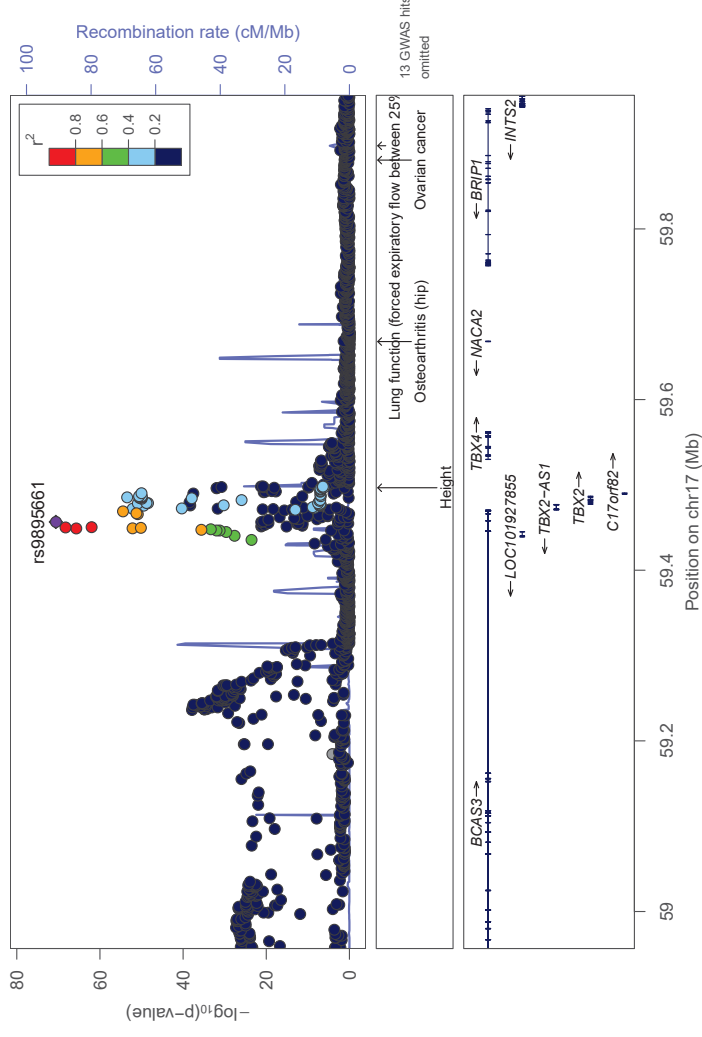

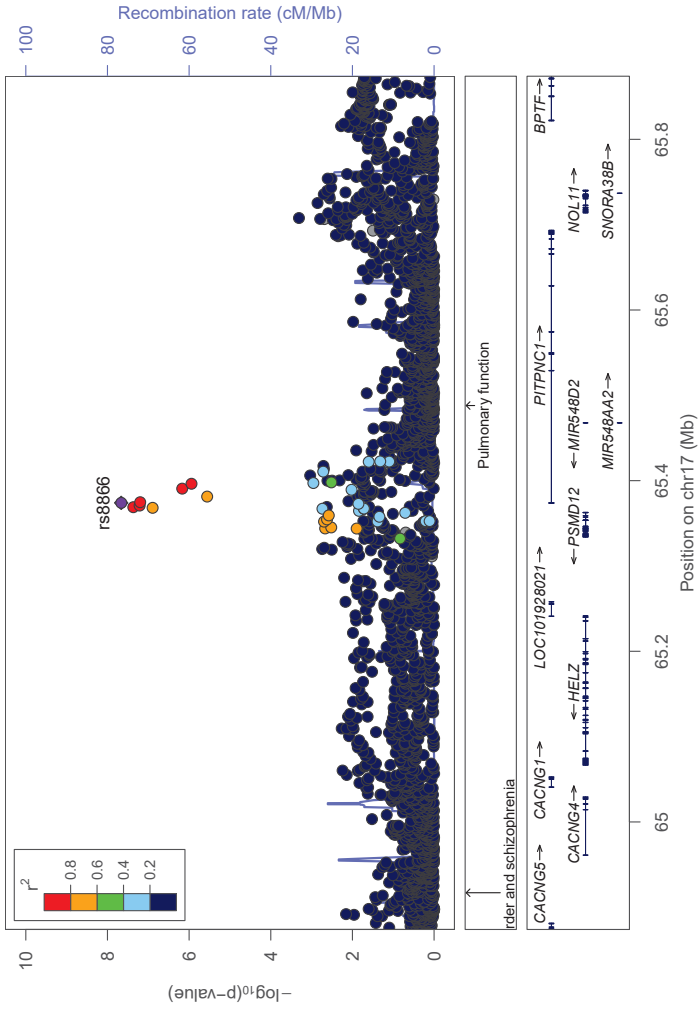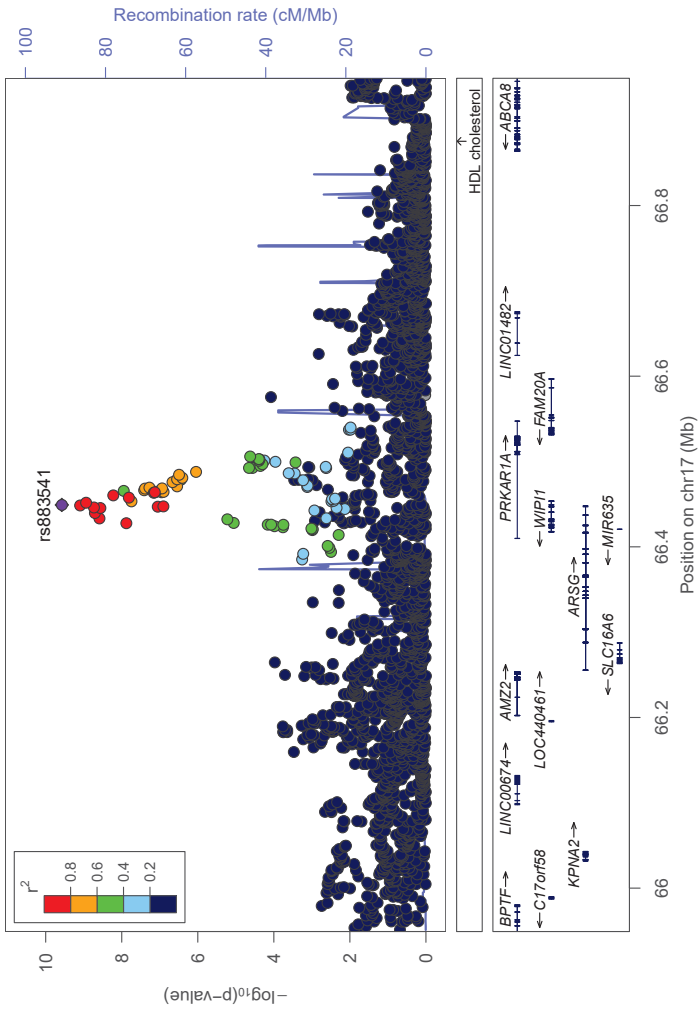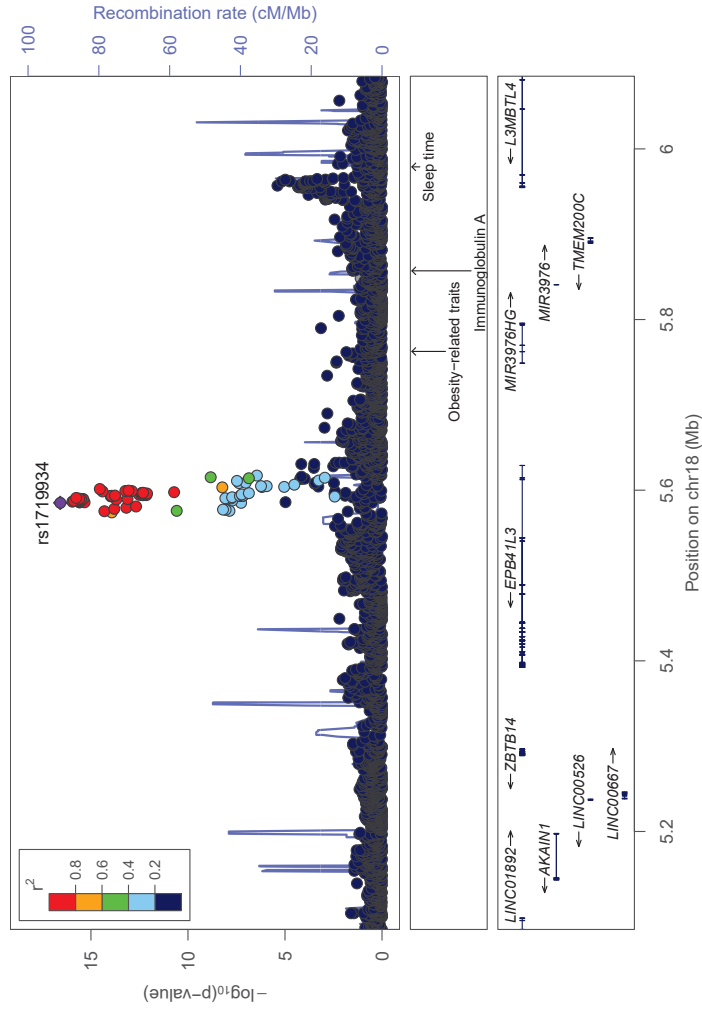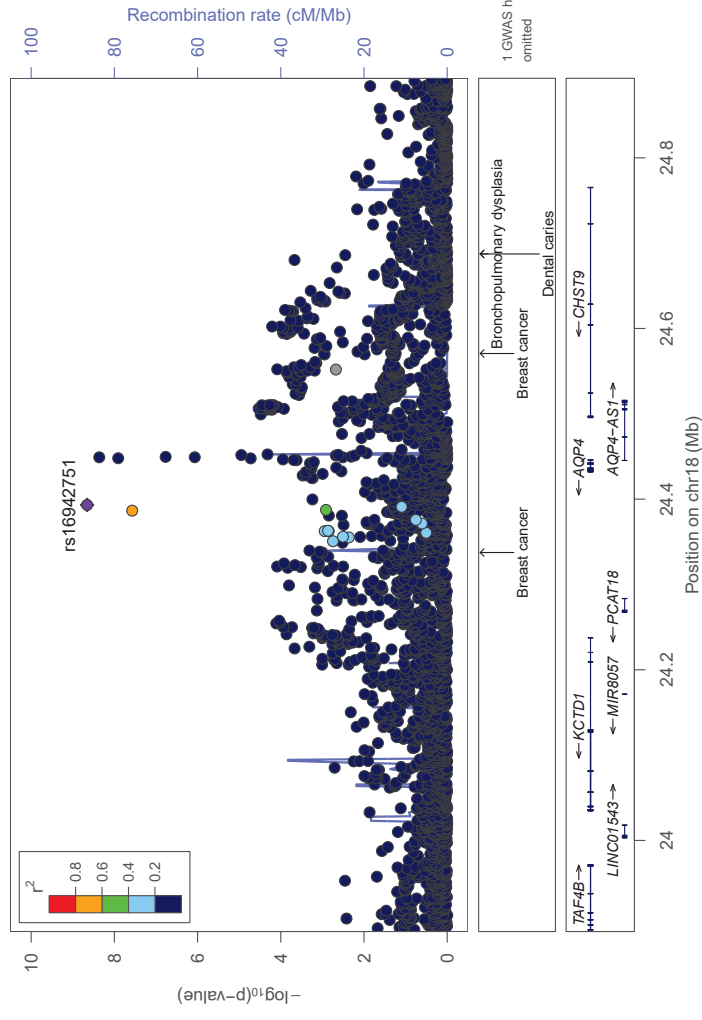

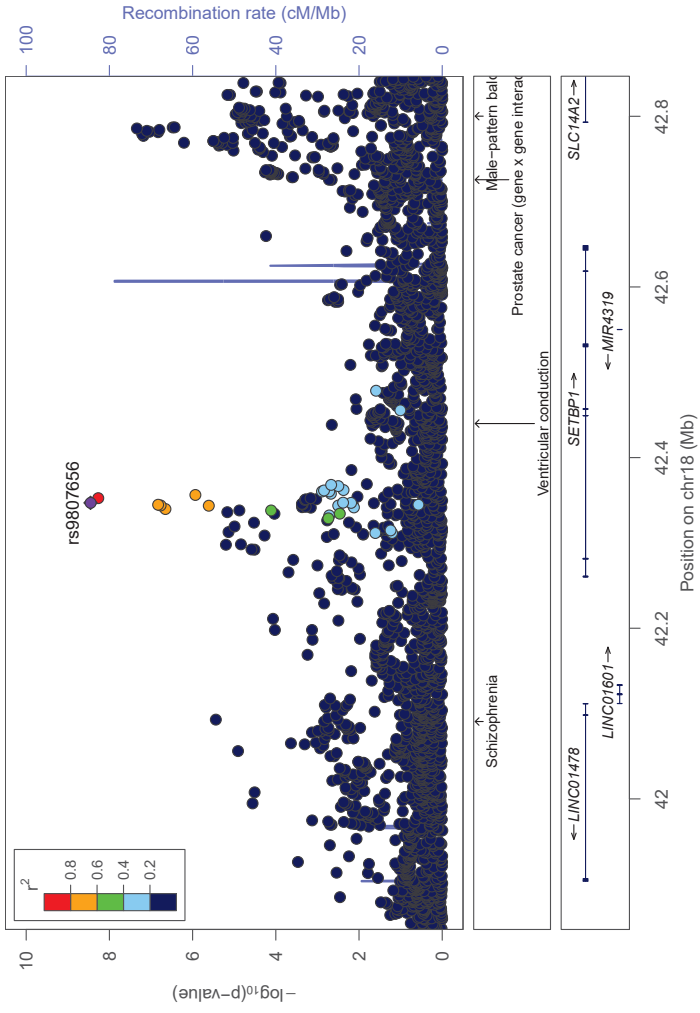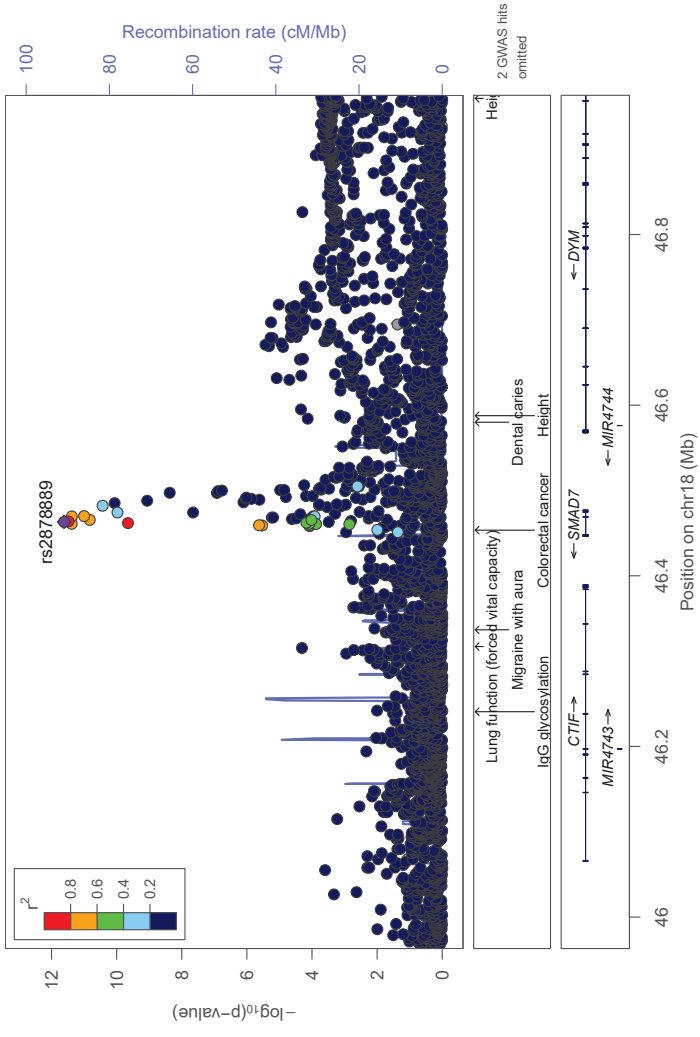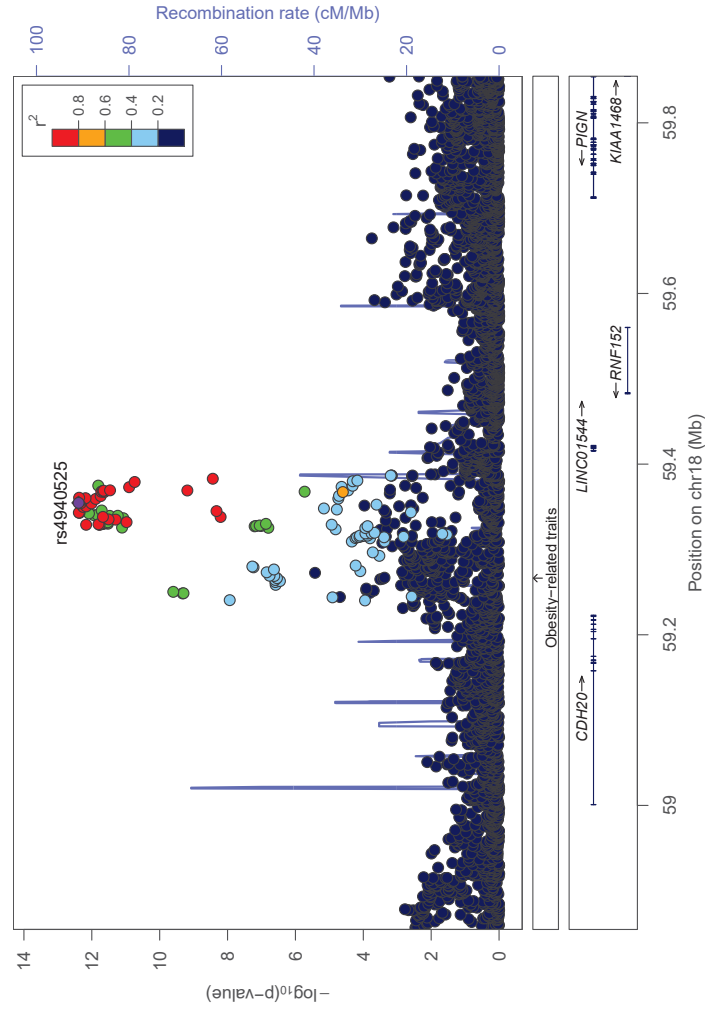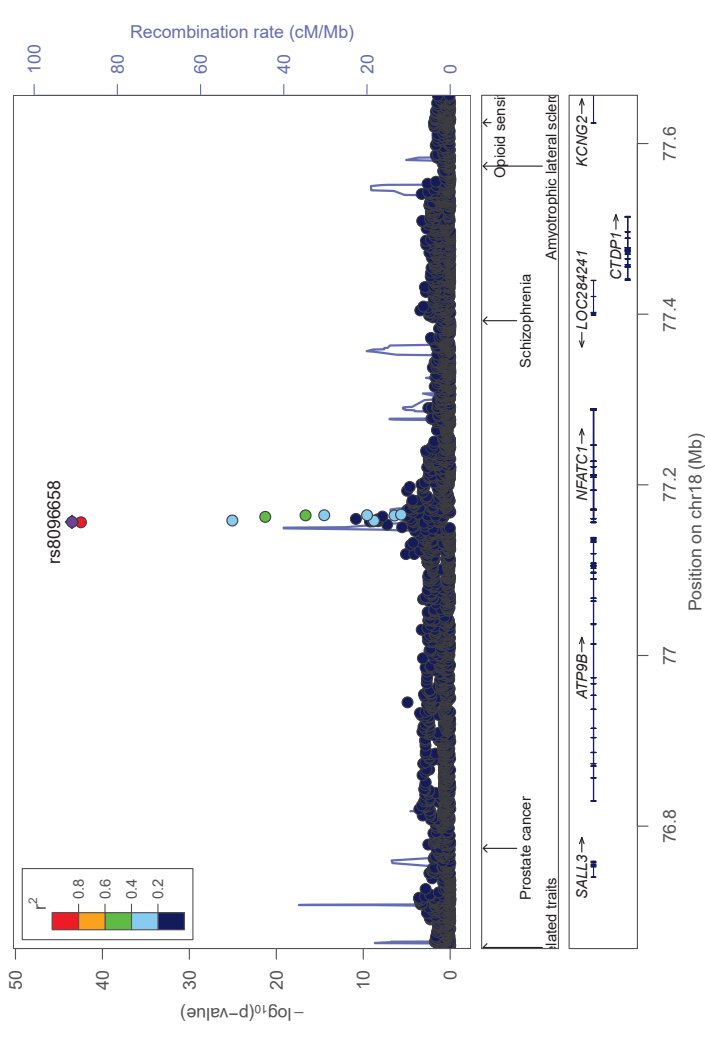



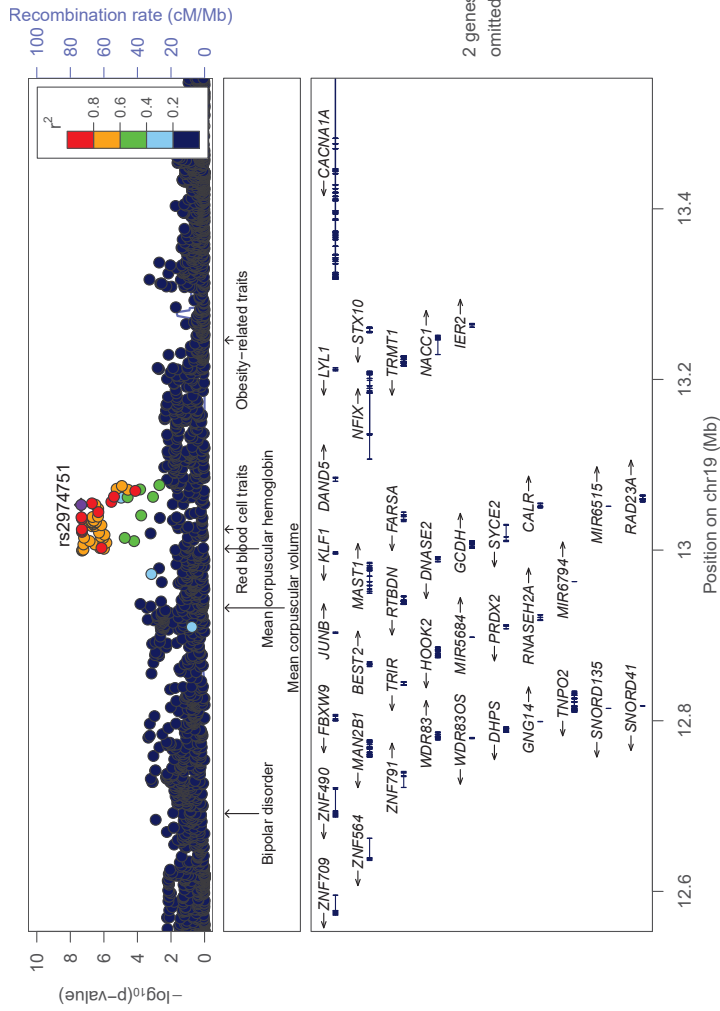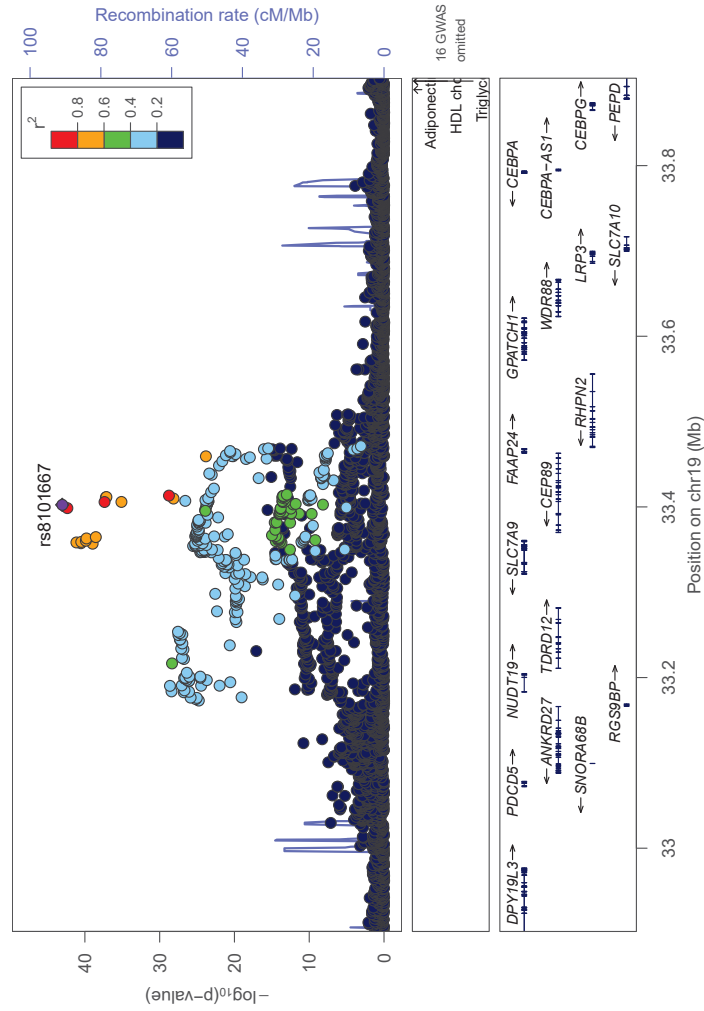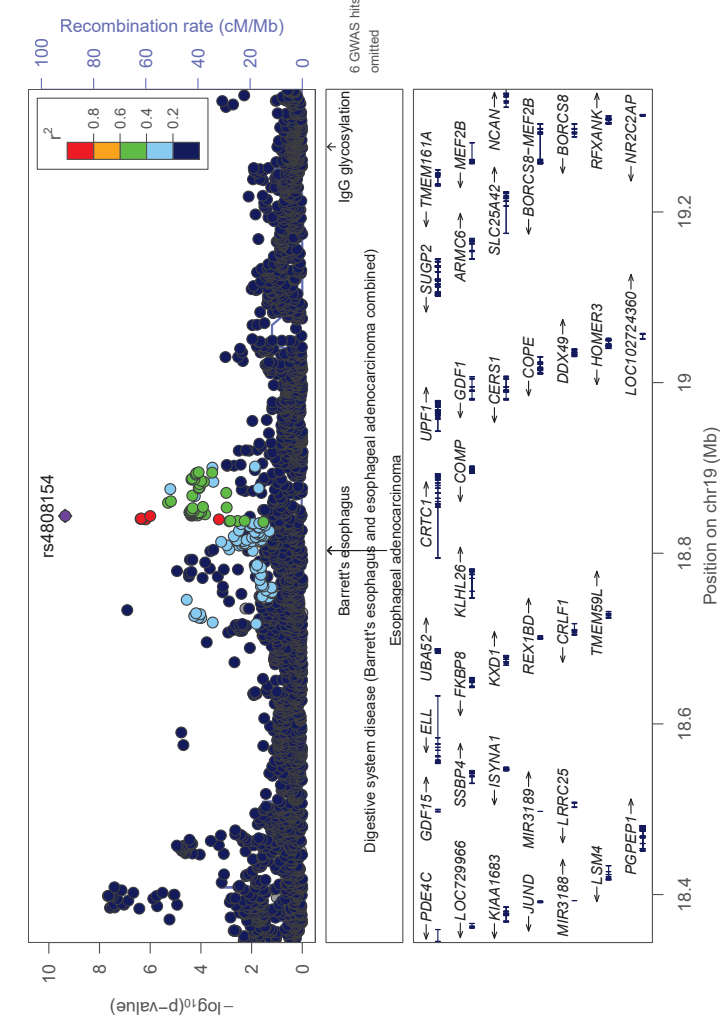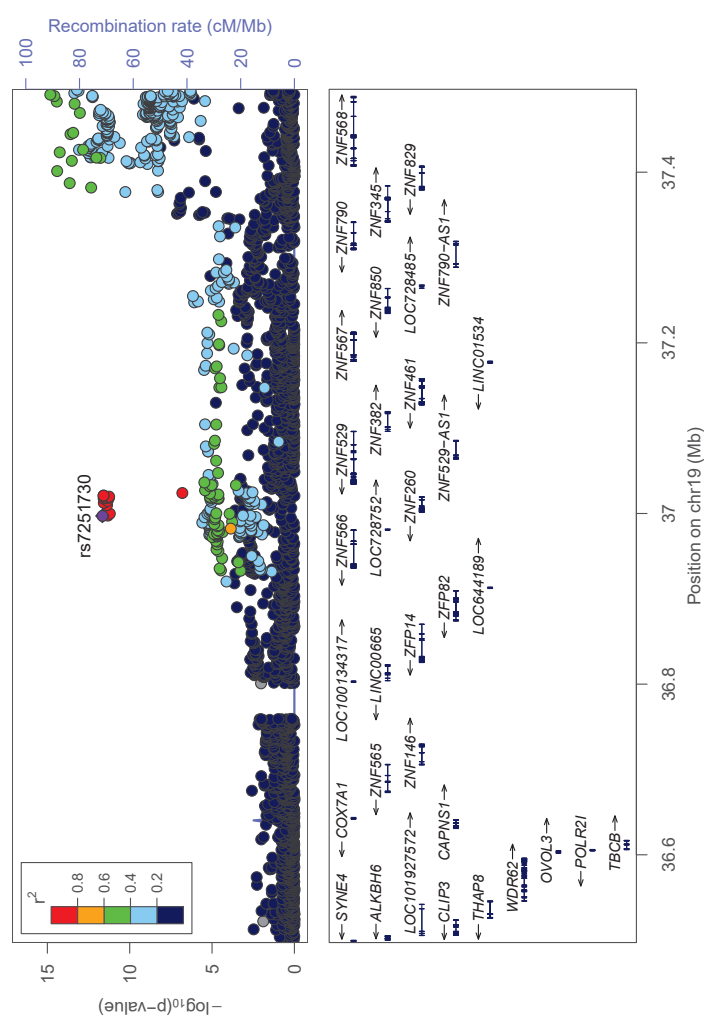

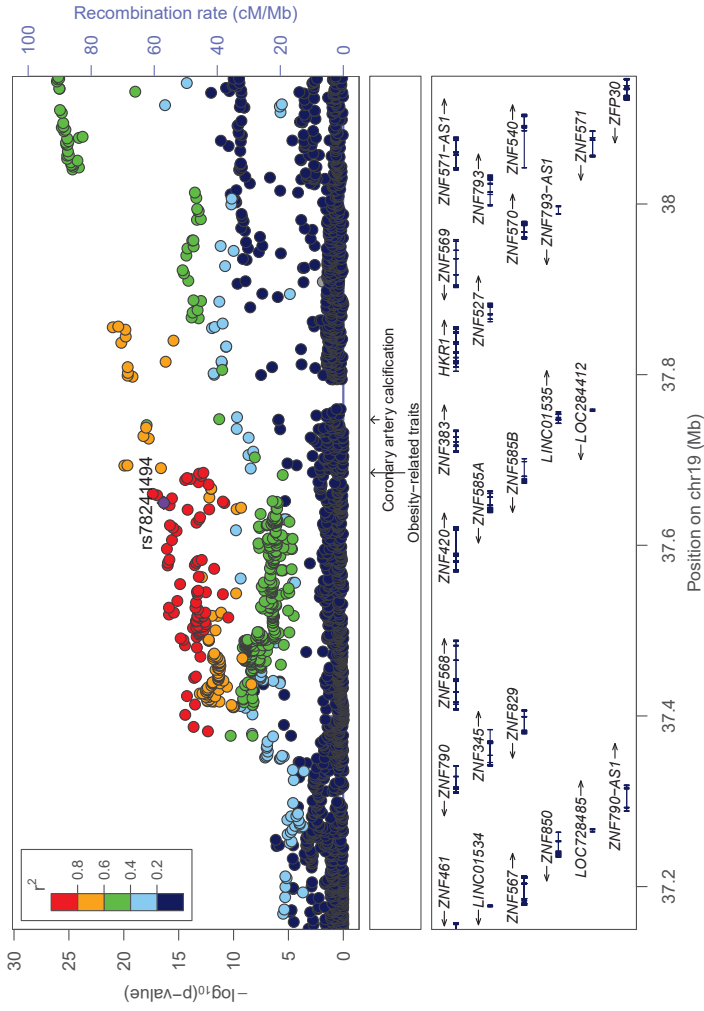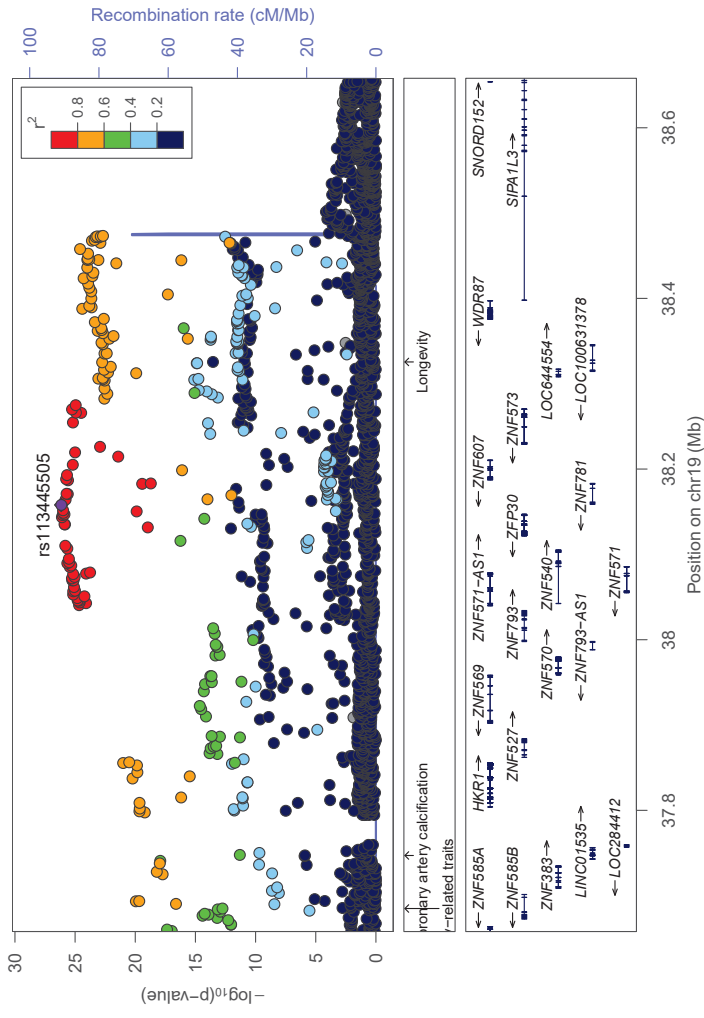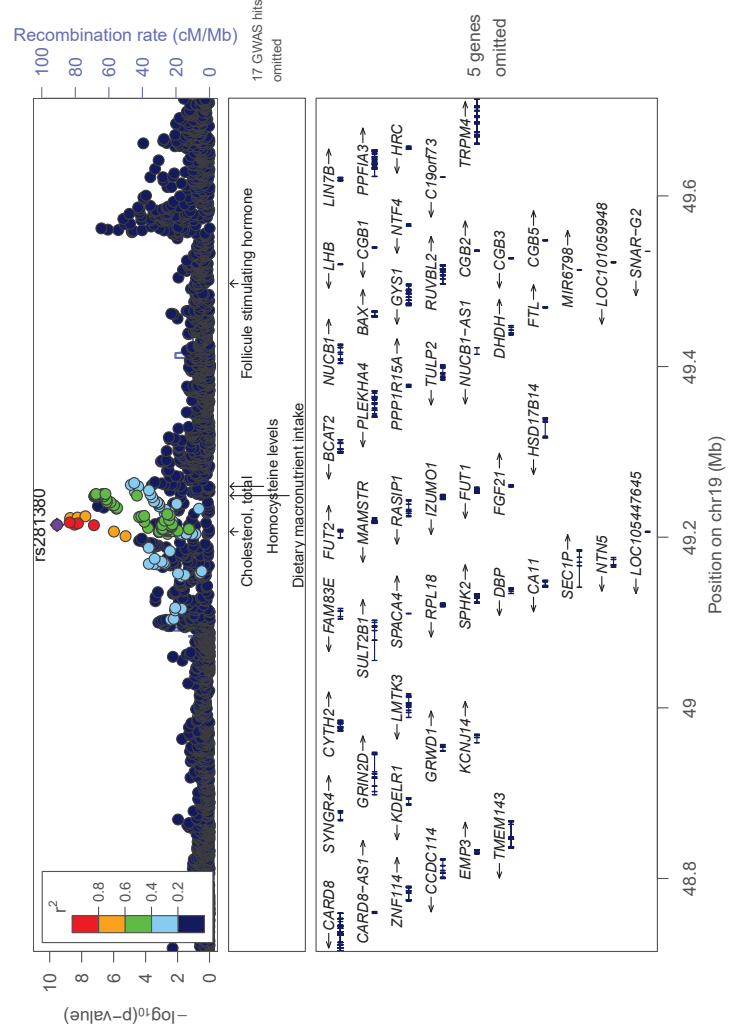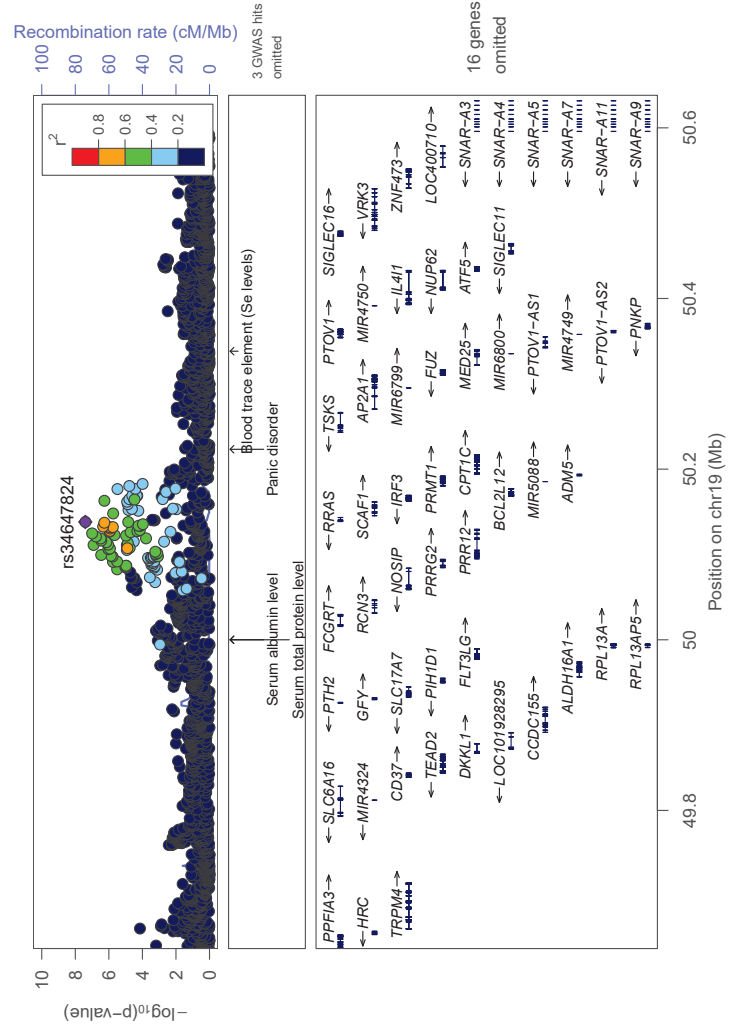

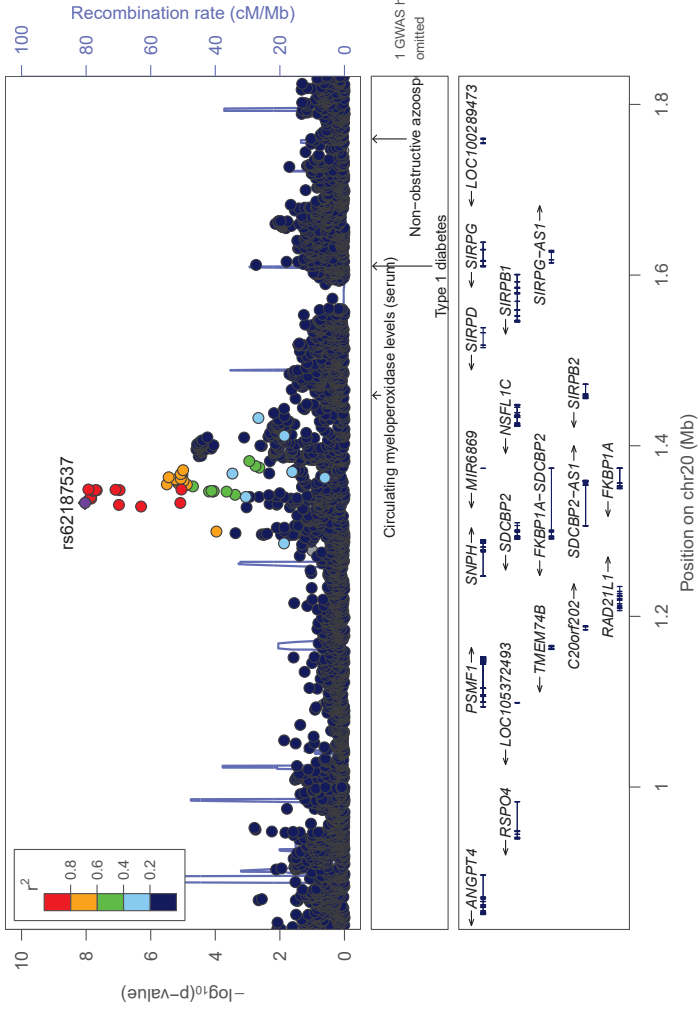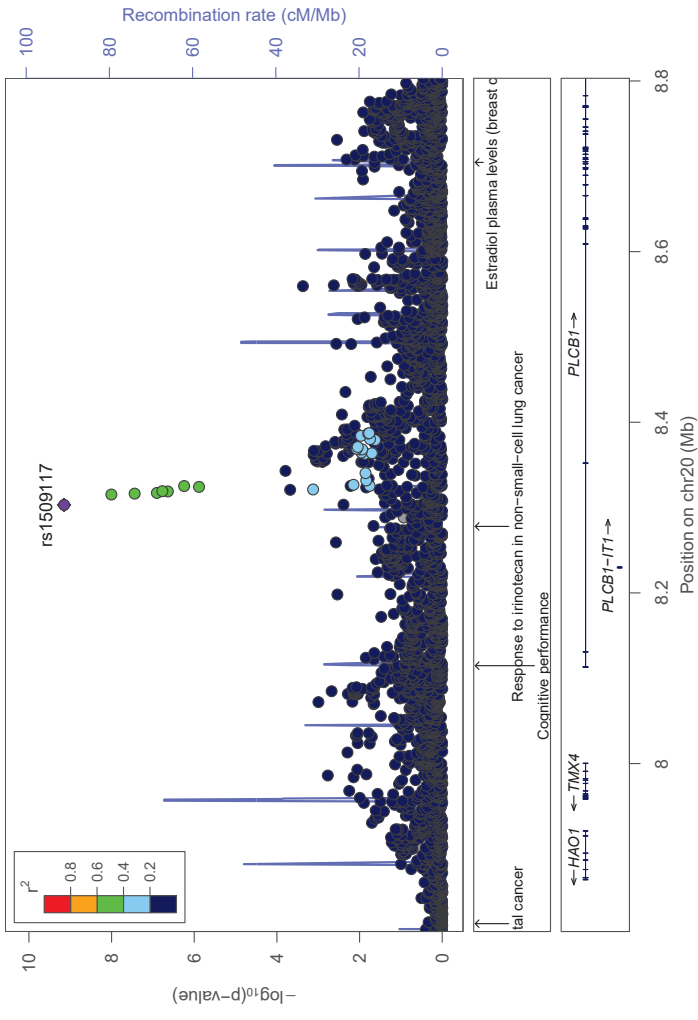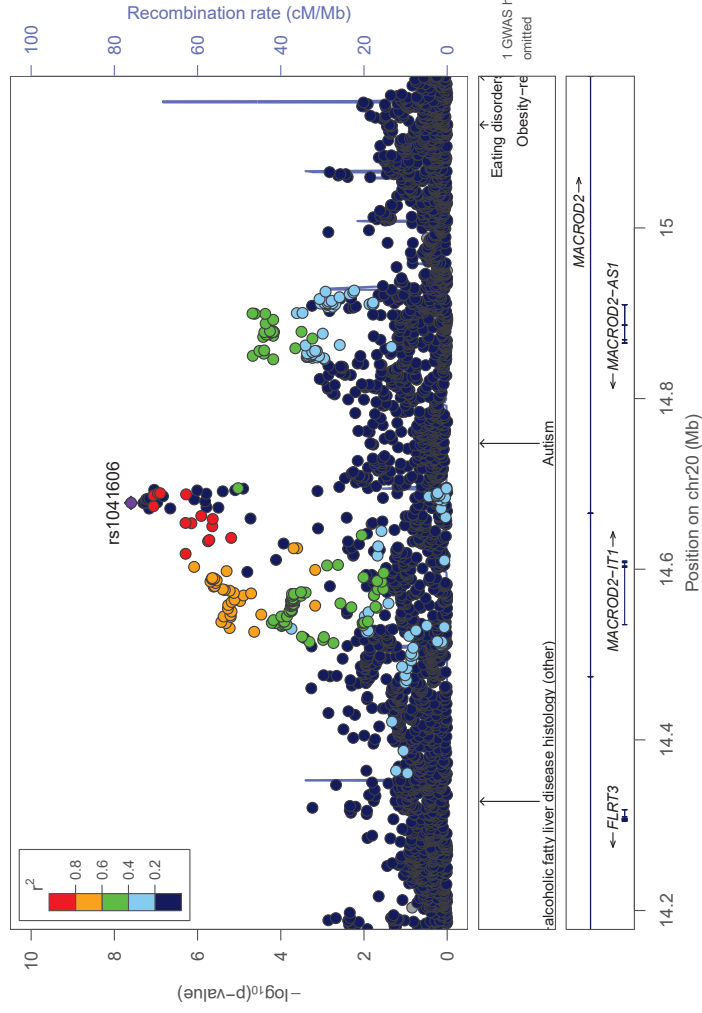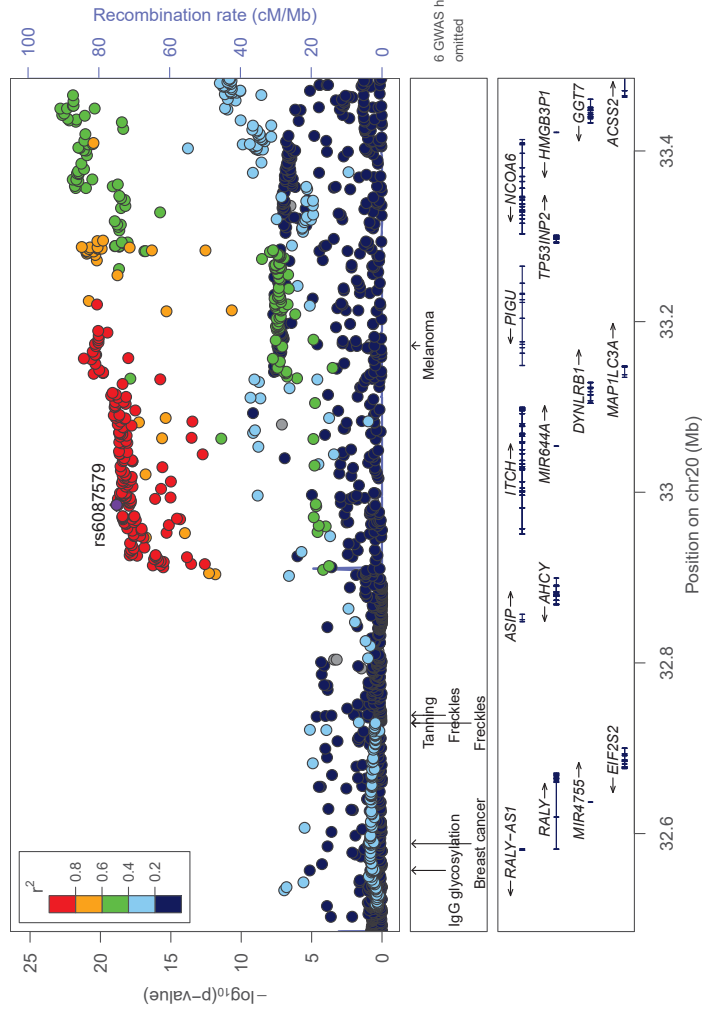

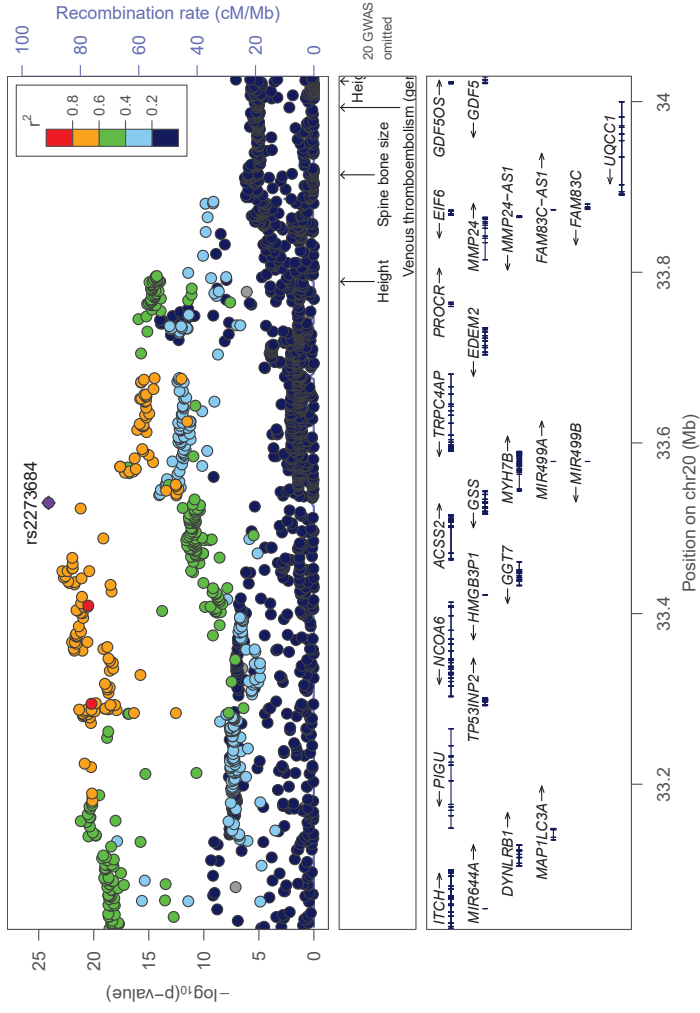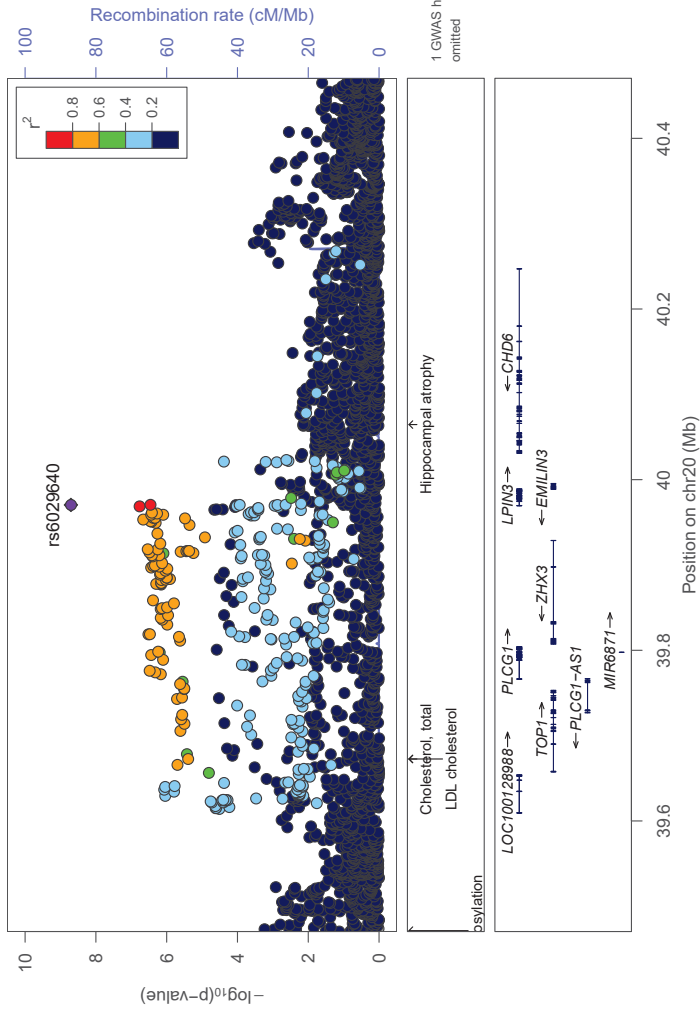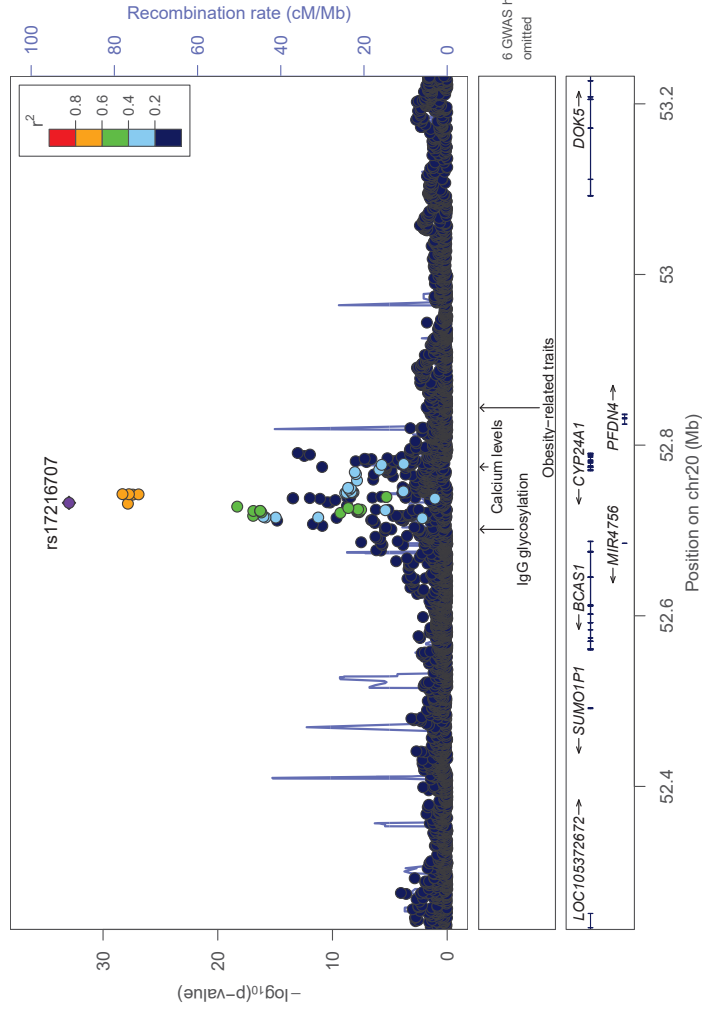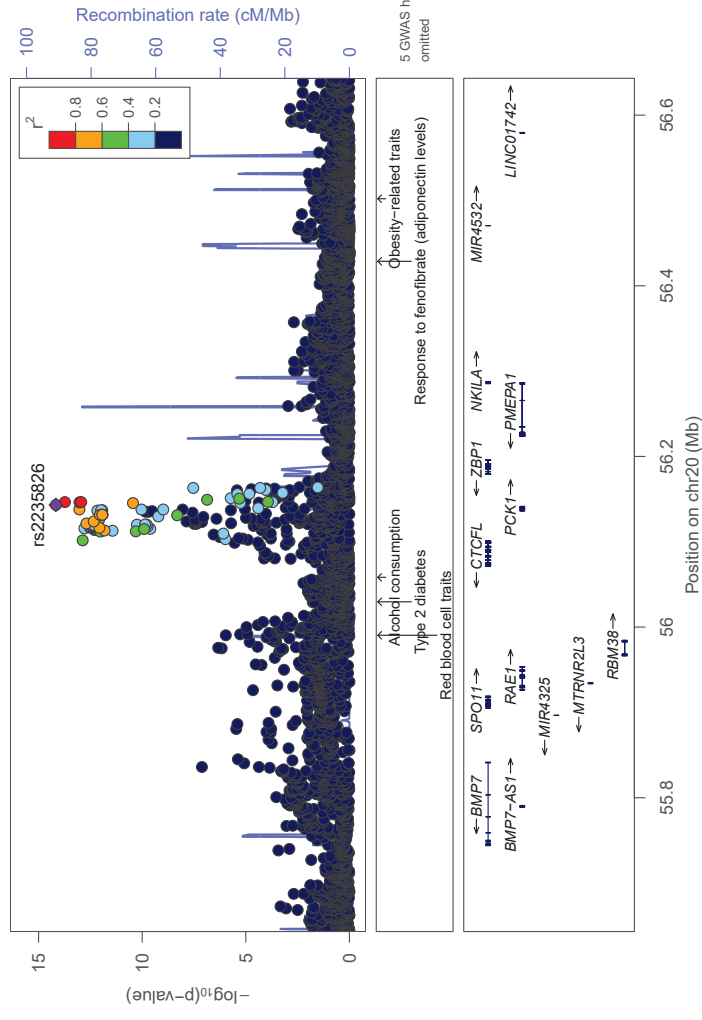

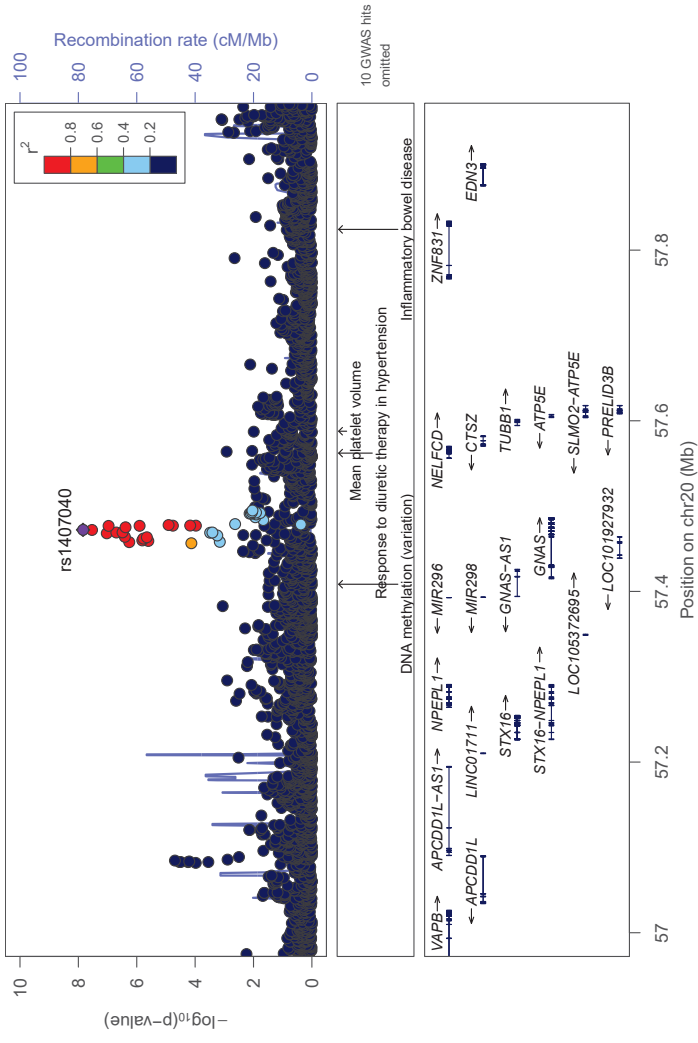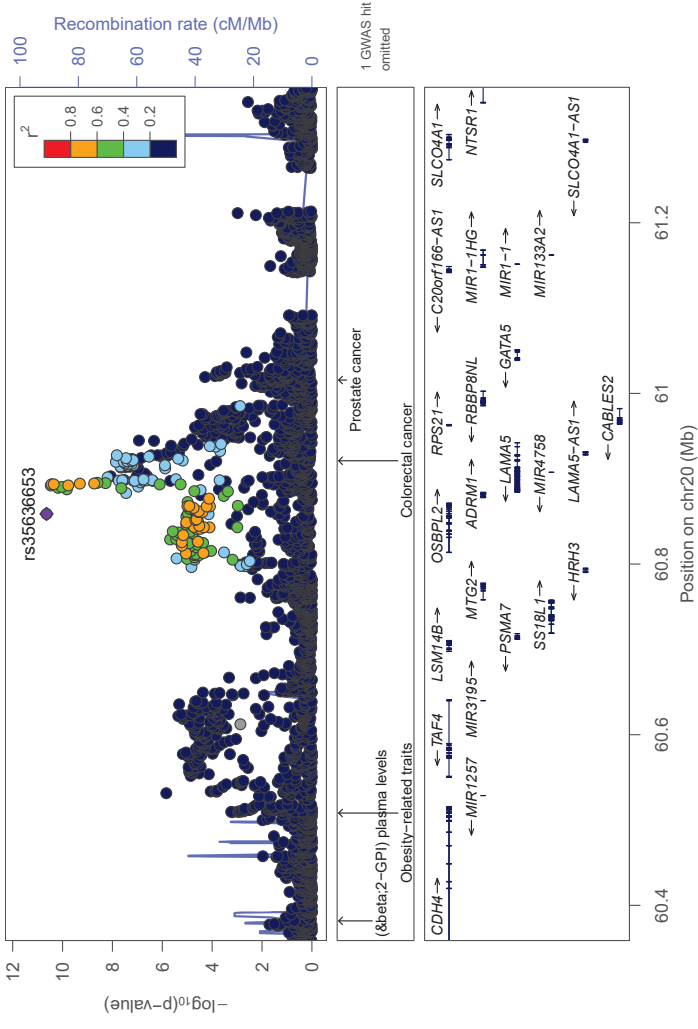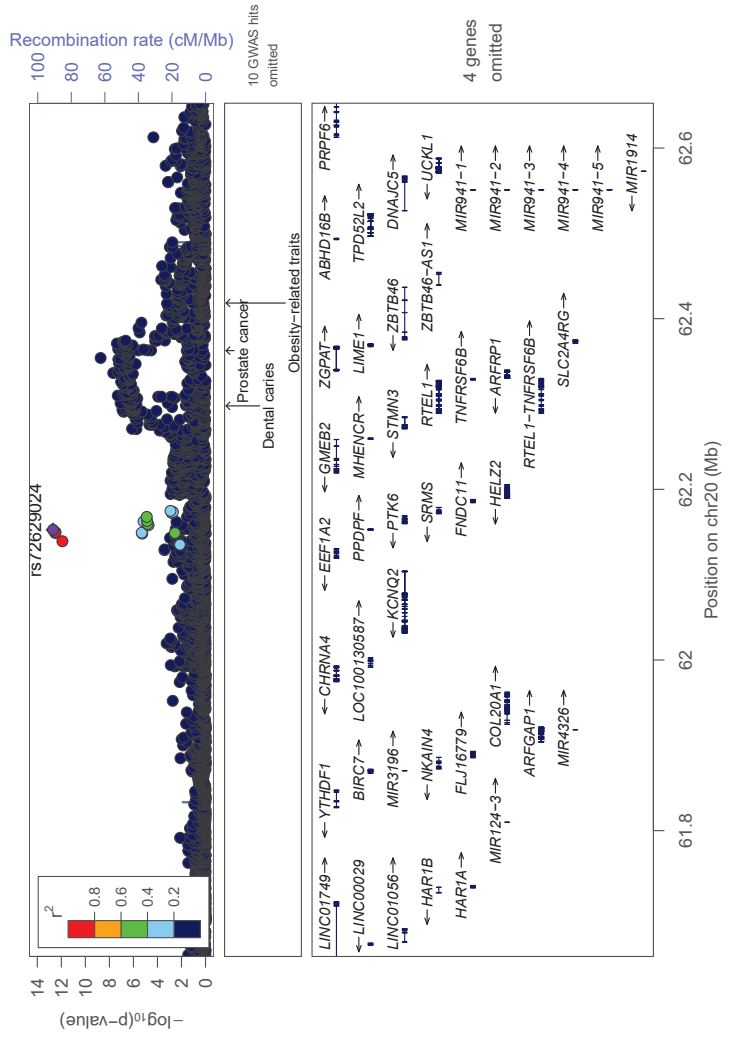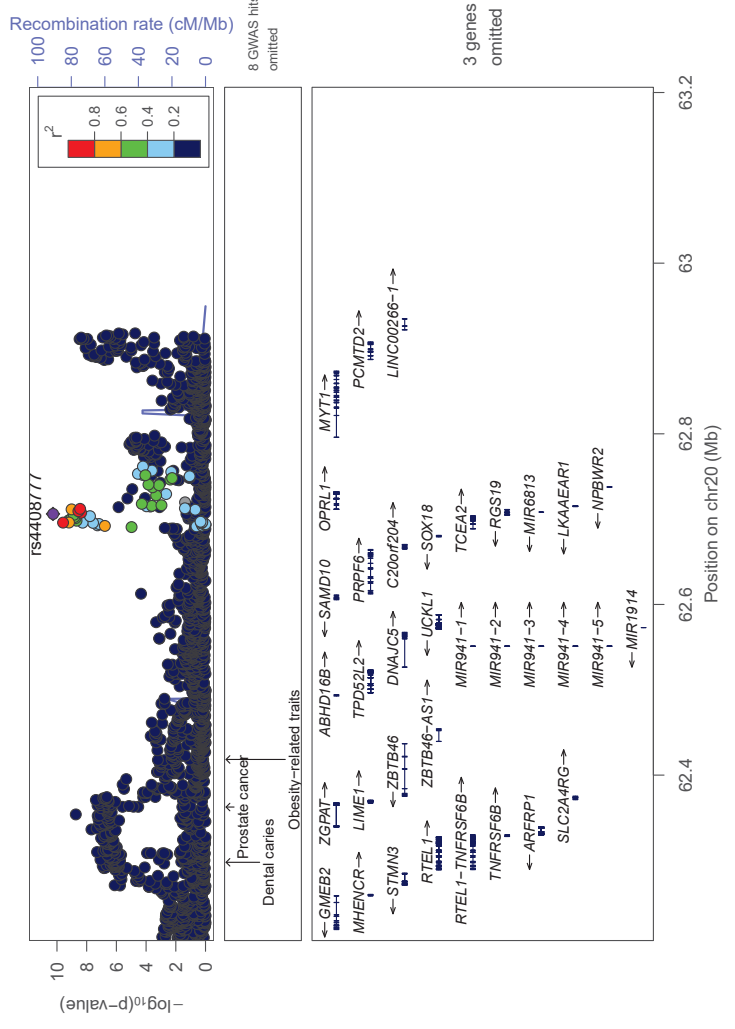

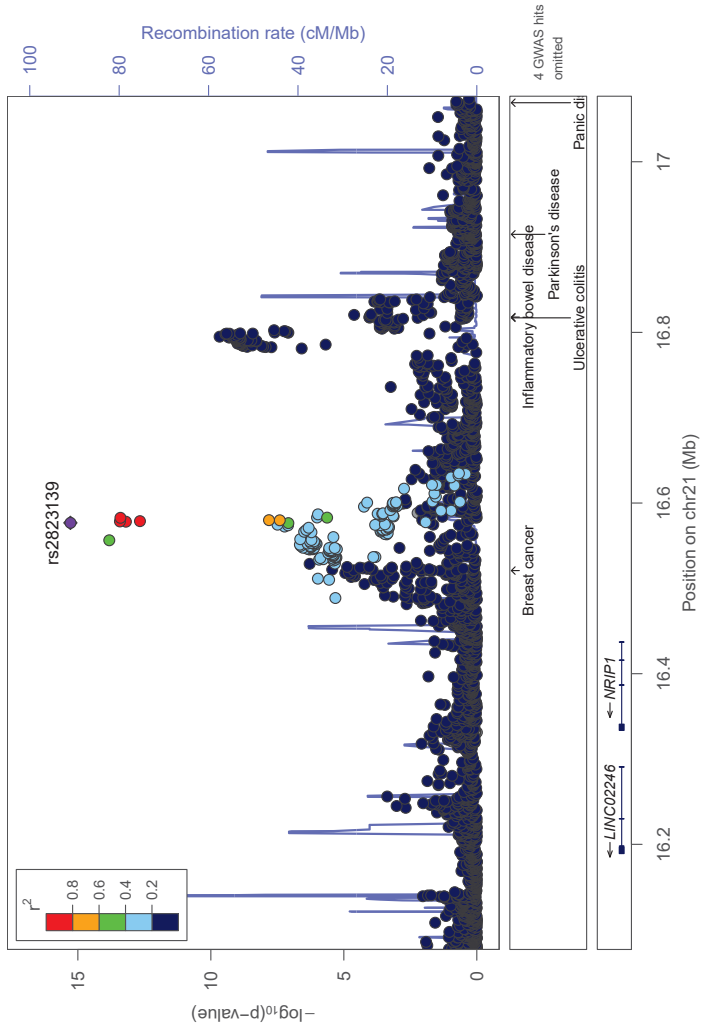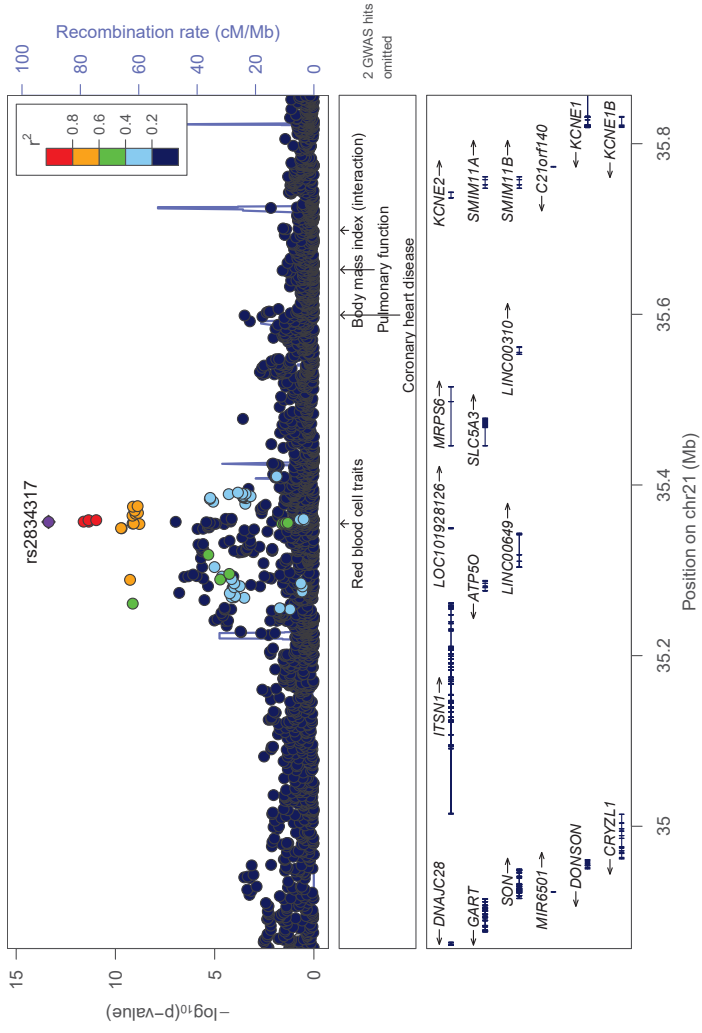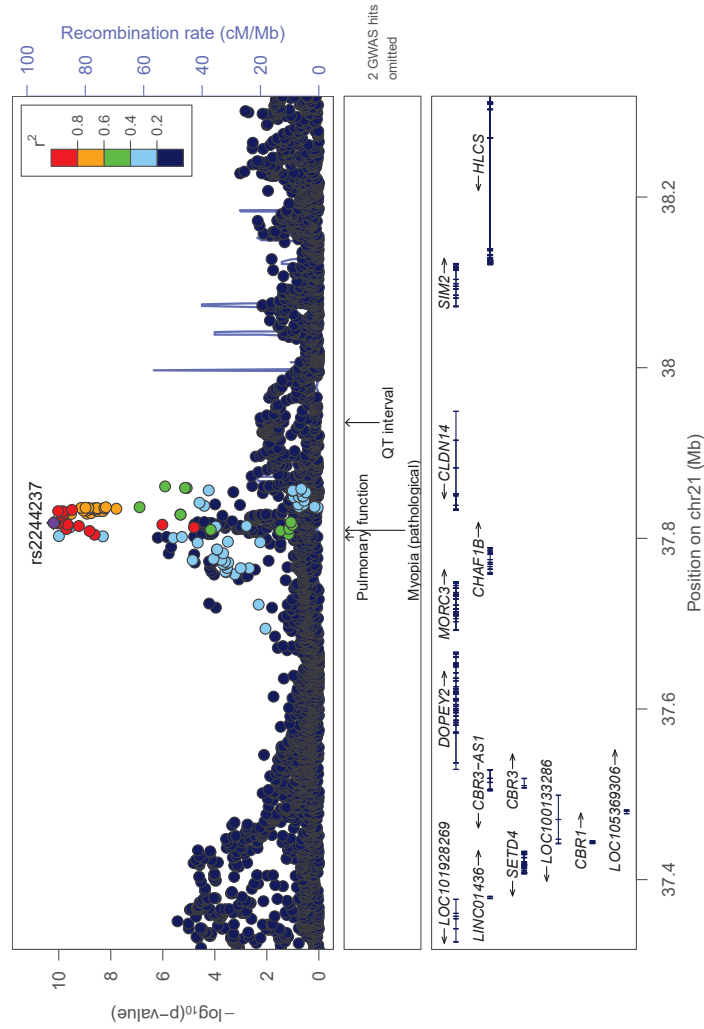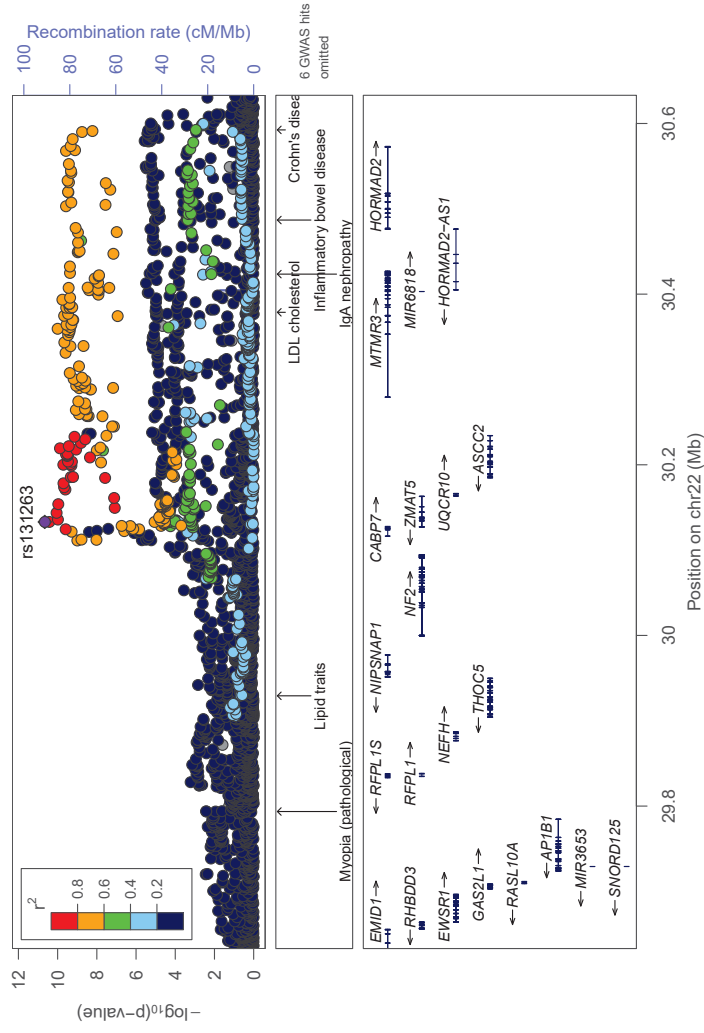

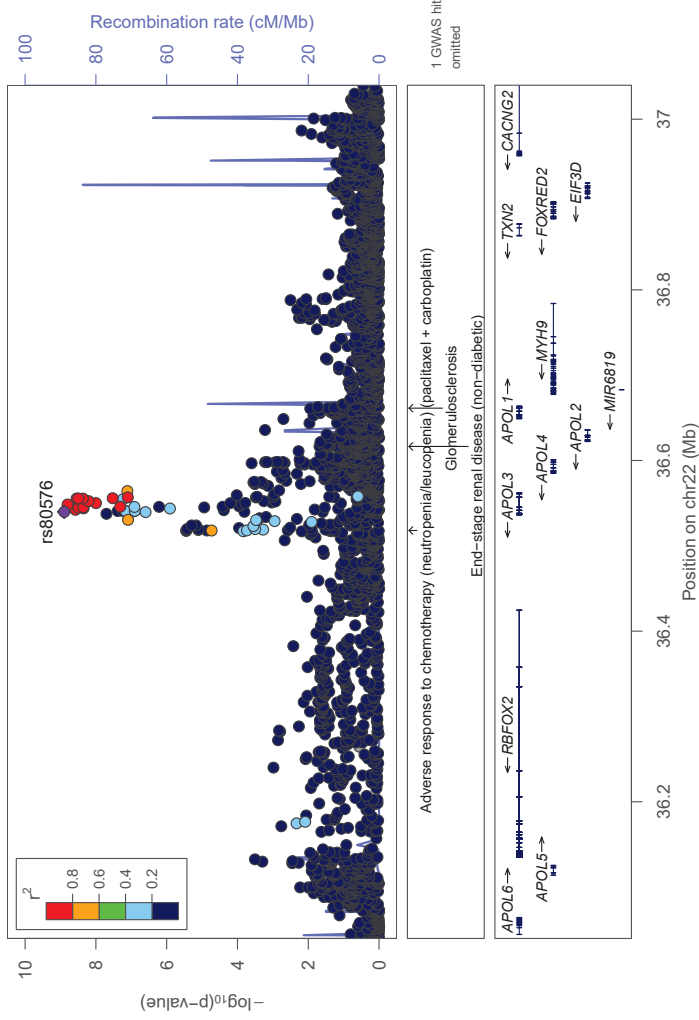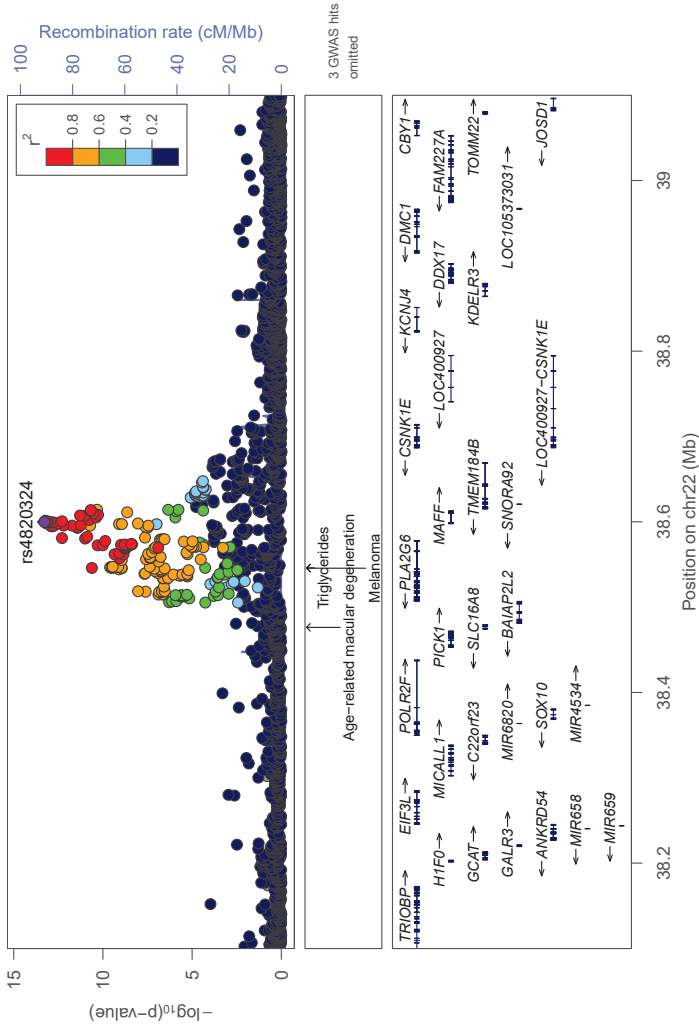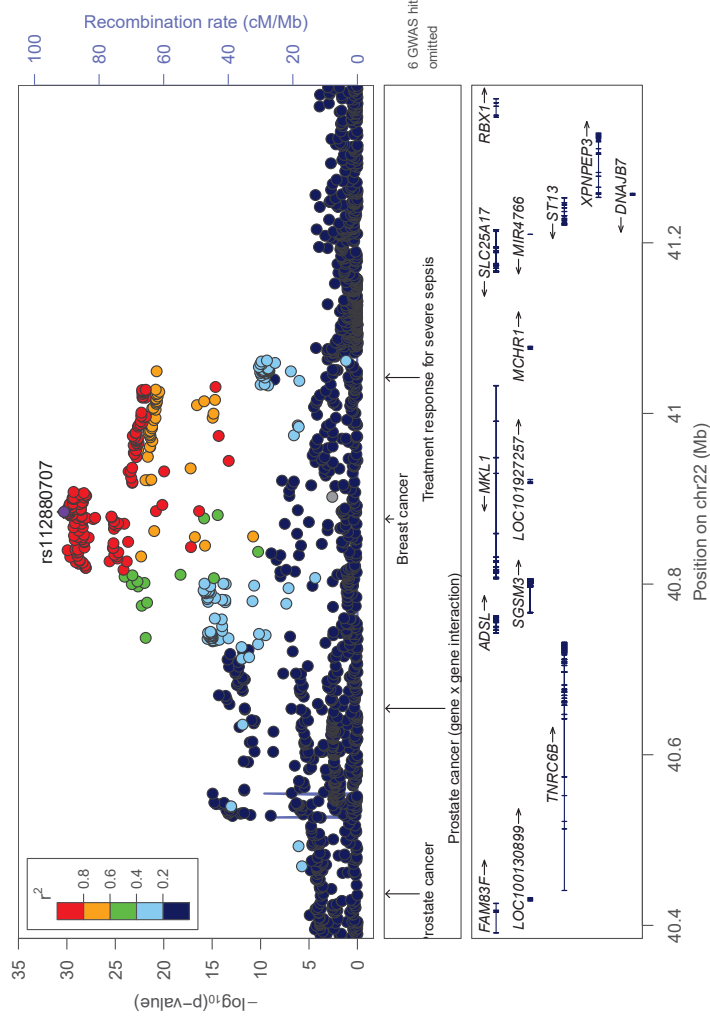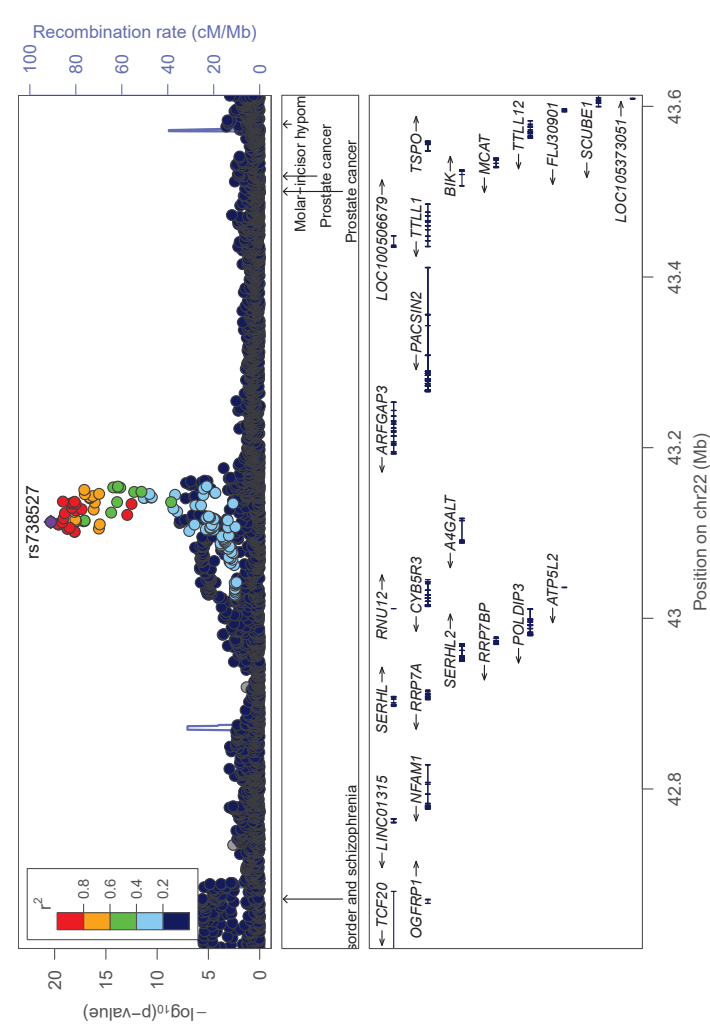

Supplement: NIHMS1038587-supplement-Supplementary_Figure_2.pdf [file NIHMS1038587-supplement-Supplementary_Figure_2.pdf]
